# Supplementary material for: Quantum mechanics/molecular mechanics studies on the mechanistic photophysics of sunscreen oxybenzone in methanol solution
Source: Royal Society of Chemistry journal article supplement (doi:10.1039/d2cp01263d), 2022-01-01
Supplement: d2cp01263d1.pdf [file d2cp01263d1.pdf]

## **Supplementary Materials for “Quantum Mechanics/Molecular Mechanics Studies on Mechanistic Photophysics of Sunscreen Oxybenzone in Methanol Solution”**

Xue-Ping Chang,<sup>\*a</sup> Li Yu,<sup>a</sup> Teng-Shuo Zhang<sup>c</sup> and Ganglong Cui<sup>b</sup>

a College of Chemistry and Chemical Engineering, Xinyang Normal University, Xinyang 464000, P. R. China

b Key Laboratory of Theoretical and Computational Photochemistry, Ministry of Education, Chemistry College, Beijing Normal University, Beijing 100875, P. R. China

c China College of Chemical Engineering, Zhejiang University of Technology, Hangzhou 310014, P. R. China

E-mail: [xuepingchang@xynu.edu.cn](mailto:xuepingchang@xynu.edu.cn)

### **Contents**

1. Active Orbitals
2. Electron Density Differences
3. Bond-Length Difference of Minima
4. QM(CASPT2)/MM Computed LIICs
5. QM(CASPT2)/MM Computed Vertical Excitation Energies and Dipole Moments at the Enol Franck-Condon Point
6. Isomerization Path
7. Cartesian Coordinates of All Computed Structures

## 1. Active Orbitals

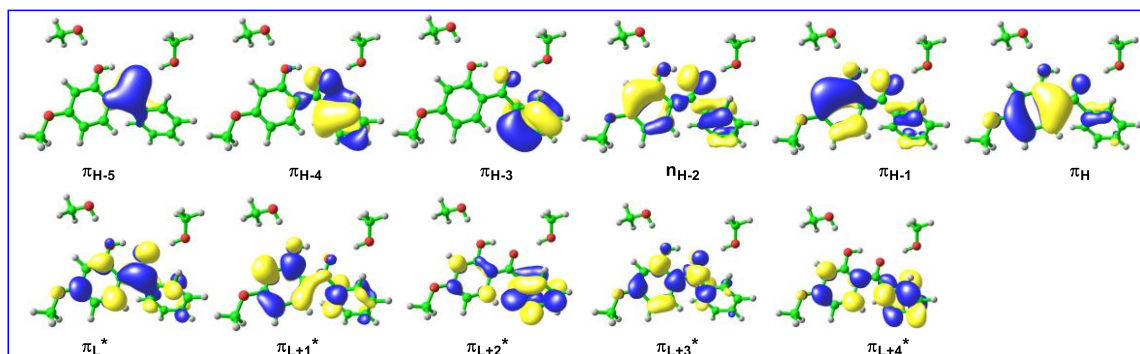

Figure S1. Molecular orbitals (MOs) included in the active space used for QM/MM calculations.

## 2. Electron Density Differences

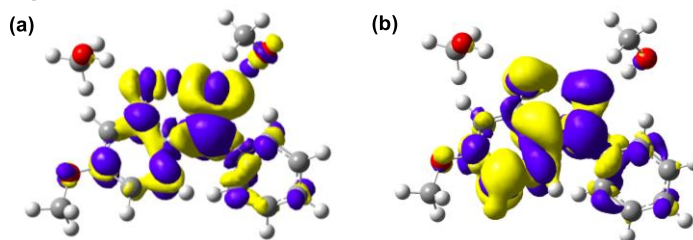

Figure S2. Isosurfaces of electron density differences between (a) the  $1n\pi^*$  and  $S_0$  states and (b) the  $1\pi\pi^*$  and  $S_0$  states of S0-ENOL computed at TD-CAM-B3LYP/PCM level of theory. Purple (yellow) indicates electron acceptor (donor) regions.

## 3. Bond-Length Difference of Minima

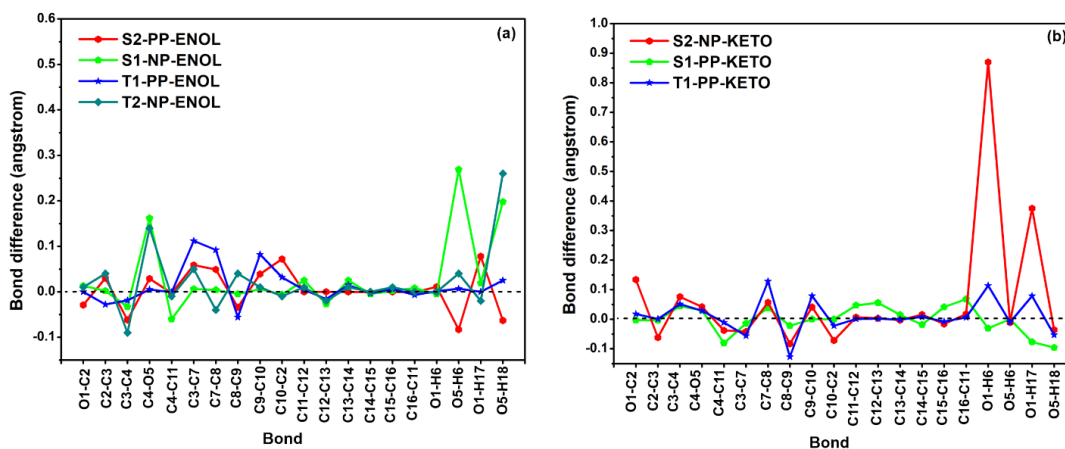

Figure S3. Bond-length difference of (a) the S2-PP-ENOL, S1-NP-ENOL, T2-NP-ENOL, and T1-PP-ENOL minima compared with the counterparts of the S0-ENOL and (b) the S2-NP-KETO, S1-PP-KETO, and T1-PP-KETO minima compared with the counterparts of the S0-KETO. The positive and negative values mean they are longer and shorter than those of the S0-ENOL or S0-KETO, respectively.

#### 4. QM(CASPT2)/MM Computed LIICs

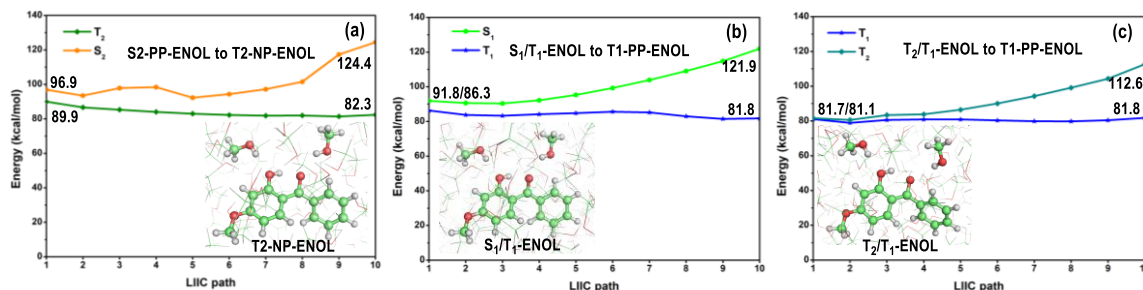

**Figure S4.** QM(CASPT2)/MM computed linearly interpolated initial coordinate paths (LIICs, in kcal/mol) connecting (a) S<sub>2</sub>-PP-ENOL and T<sub>2</sub>-NP-ENOL, (b) S<sub>1</sub>/T<sub>1</sub>-ENOL and T<sub>1</sub>-PP-ENOL, and (c) T<sub>2</sub>/T<sub>1</sub>-ENOL and T<sub>1</sub>-PP-ENOL, in methanol solution, respectively.

#### 5. QM(CASPT2)/MM Computed Vertical Excitation Energies and Dipole Moments at the Enol Franck-Condon Point

**Table S1:** QM(CASPT2)/MM computed vertical excitation energies (in kcal/mol [eV]) and dipole moments ( $\mu$ , in D) to the lowest four excited-states, i.e., S<sub>1</sub>, S<sub>2</sub>, T<sub>1</sub>, and T<sub>2</sub> at the enol Franck-Condon point, i.e., S<sub>0</sub>-ENOL of OB in methanol solution.

|        | S <sub>1</sub> ( <sup>1</sup> nπ*) | S <sub>2</sub> ( <sup>1</sup> ππ*) | T <sub>1</sub> ( <sup>3</sup> ππ*) | T <sub>2</sub> ( <sup>3</sup> nπ*) |
|--------|------------------------------------|------------------------------------|------------------------------------|------------------------------------|
| Energy | 93.6 [4.06]                        | 98.9 [4.29]                        | 81.9 [3.55]                        | 82.6 [3.58]                        |
| $\mu$  | 4.97                               | 7.59                               | 6.08                               | 6.06                               |

#### 6. Isomerization Path

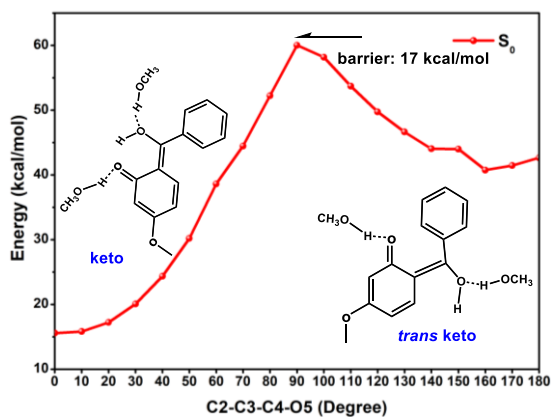

**Figure S5.** QM(CASPT2//CASSCF)/MM computed S<sub>0</sub> state isomerization path of the solvated OB molecule along the rotation of the central C2-C3-C4-O5 dihedral angle.

## 7. Cartesian coordinates of All Computed Structures

In xyz format (unit: Ångstrom)

### CASSCF/6-31G\*

S0-ENOL

|   |              |              |              |
|---|--------------|--------------|--------------|
| C | -2.637431189 | -0.695595048 | 0.436158033  |
| C | -3.736978267 | -1.523800110 | 0.243698019  |
| C | -4.750410342 | -1.147863083 | -0.635095044 |
| C | -4.675607339 | 0.053070006  | -1.303631095 |
| C | -3.587005259 | 0.897287067  | -1.110708078 |
| C | -2.550899183 | 0.522000039  | -0.253248017 |
| C | -0.005549000 | 1.052874074  | -0.040131003 |
| C | 0.369371027  | -0.227380018 | -0.454634034 |
| C | 1.038664077  | 1.944421139  | 0.317609020  |
| C | 1.693231124  | -0.646326048 | -0.487964036 |
| C | 2.357777168  | 1.530150110  | 0.286557021  |
| C | 2.689447195  | 0.231993015  | -0.111990009 |
| H | -1.867100136 | -0.984384070 | 1.127377082  |
| H | -3.807979275 | -2.453741176 | 0.776626055  |
| H | -5.595569402 | -1.795063131 | -0.779434055 |
| H | -5.461169393 | 0.349656026  | -1.973727140 |
| H | -3.548627256 | 1.843053131  | -1.616089115 |
| C | -1.427195105 | 1.488841106  | -0.036476003 |
| O | -1.709663126 | 2.665927193  | 0.120122008  |
| H | 1.916141140  | -1.642602117 | -0.814793060 |
| H | 3.137568227  | 2.211928161  | 0.564997040  |
| O | 4.000131287  | -0.051352006 | -0.099748006 |
| C | 4.445979322  | -1.319964093 | -0.493115037 |
| H | 5.520039399  | -1.300779094 | -0.392400028 |
| H | 4.186598299  | -1.527752112 | -1.525463108 |
| H | 4.041023289  | -2.096791151 | 0.146030013  |
| H | -0.383459028 | -0.916571064 | -0.778715057 |
| O | 0.819464060  | 3.219030233  | 0.705953052  |
| H | -0.100960008 | 3.438381246  | 0.605170044  |
| C | 3.567884255  | 5.470021396  | 1.689361124  |
| O | 2.387378174  | 5.792071415  | 1.022001074  |
| H | 1.924343139  | 4.991646359  | 0.810230059  |
| H | 3.390906242  | 4.822152346  | 2.545209183  |
| H | 4.005295289  | 6.392334462  | 2.047926146  |
| H | 4.290869311  | 4.984147356  | 1.035644073  |
| C | -4.311069308 | 5.532672400  | -0.254039016 |
| O | -4.462977321 | 4.143584296  | -0.278974022 |
| H | -3.659670265 | 3.729799269  | 0.007872999  |

|   |              |             |              |
|---|--------------|-------------|--------------|
| H | -5.254252378 | 5.967519428 | -0.556090040 |
| H | -3.540258255 | 5.873784420 | -0.941803066 |
| H | -4.071159293 | 5.899610424 | 0.741088051  |

S2-PP-ENOL

|   |              |              |              |
|---|--------------|--------------|--------------|
| C | -2.667068194 | -0.714328050 | 0.410641032  |
| C | -3.757864269 | -1.547831113 | 0.192596012  |
| C | -4.769697345 | -1.159181084 | -0.680955047 |
| C | -4.696870337 | 0.058379003  | -1.319676093 |
| C | -3.613924257 | 0.904241065  | -1.101527080 |
| C | -2.579547188 | 0.520368035  | -0.245603020 |
| C | -0.094308006 | 1.050139074  | -0.028311004 |
| C | 0.375477029  | -0.266072019 | -0.436306033 |
| C | 0.984178072  | 1.973821143  | 0.259740017  |
| C | 1.761616129  | -0.649401049 | -0.432109033 |
| C | 2.381596172  | 1.569829112  | 0.227910016  |
| C | 2.738523199  | 0.220639015  | -0.116264009 |
| H | -1.900786136 | -1.013529073 | 1.102945079  |
| H | -3.824953276 | -2.489420180 | 0.706164051  |
| H | -5.610683403 | -1.807244130 | -0.843998061 |
| H | -5.480053395 | 0.365837028  | -1.988014142 |
| H | -3.579336259 | 1.861877135  | -1.584113114 |
| C | -1.454820104 | 1.473895108  | 0.000166998  |
| O | -1.739661125 | 2.673231194  | 0.204435015  |
| H | 1.985899142  | -1.660755120 | -0.710380049 |
| H | 3.136601225  | 2.291159166  | 0.463017033  |
| O | 4.059871292  | -0.012688004 | -0.078477007 |
| C | 4.534631328  | -1.286536093 | -0.417397033 |
| H | 5.607935401  | -1.242371092 | -0.318830023 |
| H | 4.275798306  | -1.541329112 | -1.439392106 |
| H | 4.142147299  | -2.041921148 | 0.254583020  |
| H | -0.335112024 | -0.979014069 | -0.795700059 |
| O | 0.773445054  | 3.239391233  | 0.575941039  |
| H | -0.173157014 | 3.413760243  | 0.544947038  |
| C | 3.514717255  | 5.477356396  | 1.705438121  |
| O | 2.377722171  | 5.864048421  | 0.996966074  |
| H | 1.889982136  | 5.091735367  | 0.744862053  |
| H | 3.273620238  | 4.830331347  | 2.546140181  |
| H | 3.980506288  | 6.373894460  | 2.091349150  |
| H | 4.239245302  | 4.965677356  | 1.073222077  |
| C | -4.264641307 | 5.493194396  | -0.229305017 |
| O | -4.444301322 | 4.109109298  | -0.233131016 |
| H | -3.645494263 | 3.680550266  | 0.049402004  |
| H | -5.194283372 | 5.943687428  | -0.551544042 |
| H | -3.477735248 | 5.808620417  | -0.911813067 |
| H | -4.030641292 | 5.873551423  | 0.762688056  |

## S1-NP-ENOL

|   |              |              |              |
|---|--------------|--------------|--------------|
| C | -2.545250184 | -0.782042057 | 0.261420017  |
| C | -3.680641263 | -1.576236115 | 0.124998011  |
| C | -4.793766347 | -1.102078080 | -0.555625041 |
| C | -4.771452345 | 0.194031014  | -1.090514081 |
| C | -3.669317262 | 0.986644070  | -0.961577070 |
| C | -2.504846178 | 0.510357039  | -0.301424023 |
| C | 0.064005004  | 0.980752073  | -0.116557009 |
| C | 0.518421039  | -0.285990018 | -0.513839036 |
| C | 1.054626074  | 1.885308135  | 0.352621028  |
| C | 1.859994132  | -0.654852046 | -0.456712034 |
| C | 2.384662172  | 1.529515108  | 0.391039026  |
| C | 2.796089201  | 0.250946017  | -0.017485001 |
| H | -1.705765121 | -1.151708085 | 0.818526061  |
| H | -3.696498266 | -2.558752184 | 0.560308043  |
| H | -5.667693409 | -1.716907123 | -0.662223046 |
| H | -5.630975403 | 0.566026041  | -1.616744114 |
| H | -3.682103264 | 1.975556140  | -1.378782102 |
| C | -1.339641099 | 1.348153095  | -0.208036013 |
| O | -1.578431115 | 2.689718192  | -0.442020031 |
| H | 2.138669153  | -1.637289120 | -0.783881054 |
| H | 3.114399223  | 2.227306163  | 0.753184053  |
| O | 4.118146296  | 0.023148001  | 0.071238005  |
| C | 4.629837332  | -1.227782088 | -0.292166019 |
| H | 5.694462412  | -1.175303083 | -0.123305009 |
| H | 4.444196318  | -1.442855105 | -1.339113096 |
| H | 4.210285305  | -2.019571146 | 0.319160023  |
| H | -0.183955014 | -0.988200073 | -0.915301065 |
| O | 0.761654054  | 3.150103224  | 0.768008054  |
| H | -0.147436010 | 3.247820233  | 1.015736071  |
| C | 3.378310241  | 5.632120405  | 1.623142116  |
| O | 2.127133153  | 5.852770421  | 1.047896077  |
| H | 1.741305126  | 5.018526362  | 0.813450061  |
| H | 3.323218238  | 4.963406360  | 2.479633179  |
| H | 3.755633268  | 6.587486474  | 1.963152141  |
| H | 4.091381294  | 5.219862377  | 0.911312063  |
| C | -4.420860321 | 5.961699431  | -0.604660044 |
| O | -4.138316299 | 4.610204333  | -0.375253028 |
| H | -3.201185228 | 4.484727321  | -0.331363025 |
| H | -5.496695395 | 6.068141439  | -0.608186042 |
| H | -4.037447289 | 6.301702454  | -1.563657111 |
| H | -4.017269290 | 6.600492476  | 0.176879014  |

## T2-NP-ENOL

|   |              |              |              |
|---|--------------|--------------|--------------|
| C | -2.681157195 | -0.782588057 | 0.402199030  |
| C | -3.810428276 | -1.561298113 | 0.145473011  |
| C | -4.796031343 | -1.096028076 | -0.716977053 |

|   |              |              |              |
|---|--------------|--------------|--------------|
| C | -4.653830335 | 0.150588012  | -1.317709094 |
| C | -3.540105254 | 0.918656065  | -1.073146076 |
| C | -2.525517180 | 0.459548032  | -0.218119014 |
| C | 0.000629001  | 1.019296073  | -0.006519998 |
| C | 0.435151030  | -0.320303025 | -0.350518024 |
| C | 1.077250079  | 1.966075141  | 0.239616020  |
| C | 1.733753126  | -0.682882052 | -0.409203030 |
| C | 2.394200174  | 1.579338115  | 0.179370010  |
| C | 2.755256197  | 0.258267020  | -0.129515010 |
| H | -1.938832139 | -1.133594083 | 1.095291081  |
| H | -3.922086284 | -2.515419182 | 0.627458043  |
| H | -5.668583406 | -1.691918124 | -0.908322064 |
| H | -5.416328389 | 0.518859039  | -1.979137141 |
| H | -3.453206248 | 1.884642134  | -1.535648109 |
| C | -1.362595099 | 1.338241097  | 0.054113004  |
| O | -1.716114124 | 2.603779188  | 0.414091029  |
| H | 1.978754144  | -1.690383124 | -0.685161049 |
| H | 3.164370229  | 2.303532166  | 0.363089027  |
| O | 4.073254295  | -0.008716999 | -0.146101012 |
| C | 4.525313327  | -1.297450093 | -0.454264034 |
| H | 5.601710404  | -1.258297089 | -0.388351028 |
| H | 4.241243306  | -1.589323113 | -1.459809103 |
| H | 4.153067300  | -2.029785145 | 0.254147021  |
| H | -0.311593021 | -1.045286074 | -0.599393043 |
| O | 0.851550061  | 3.273152233  | 0.538261037  |
| H | -0.056050004 | 3.509995253  | 0.403730030  |
| C | 3.476136249  | 5.635564407  | 1.706892121  |
| O | 2.323109168  | 5.869112420  | 0.958807071  |
| H | 1.929676139  | 5.037074363  | 0.728756052  |
| H | 3.283376234  | 4.998744361  | 2.567500182  |
| H | 3.834549275  | 6.591427474  | 2.065821147  |
| H | 4.266514309  | 5.178814373  | 1.113109082  |
| C | -4.217479306 | 5.544240400  | -0.278316022 |
| O | -4.529164324 | 4.182285298  | -0.196332014 |
| H | -3.921287284 | 3.752046272  | 0.388764030  |
| H | -4.956558356 | 6.005292433  | -0.918524067 |
| H | -3.234045230 | 5.713035411  | -0.711356053 |
| H | -4.255782308 | 6.030295434  | 0.693171051  |

T1-PP-ENOL

|   |              |              |              |
|---|--------------|--------------|--------------|
| C | -2.578486188 | -0.735807053 | 0.390876029  |
| C | -3.664826262 | -1.583054114 | 0.168210011  |
| C | -4.704628340 | -1.179017087 | -0.660382049 |
| C | -4.668483337 | 0.078489004  | -1.256158091 |
| C | -3.611395261 | 0.926666067  | -1.023365076 |
| C | -2.547440184 | 0.524556039  | -0.206564016 |
| C | -0.033370002 | 1.089458076  | -0.026326002 |

|   |              |              |              |
|---|--------------|--------------|--------------|
| C | 0.351649024  | -0.275816019 | -0.541001037 |
| C | 1.005283074  | 1.986073141  | 0.199334016  |
| C | 1.743178127  | -0.749114056 | -0.360360028 |
| C | 2.353191170  | 1.565669112  | 0.104642007  |
| C | 2.690949196  | 0.139226010  | -0.102580010 |
| H | -1.777685130 | -1.052686078 | 1.033468075  |
| H | -3.698261268 | -2.548139185 | 0.638848048  |
| H | -5.537050399 | -1.835154134 | -0.834141060 |
| H | -5.472475392 | 0.393670026  | -1.895383136 |
| H | -3.605607258 | 1.906053138  | -1.462526105 |
| C | -1.440857101 | 1.499104107  | 0.050867004  |
| O | -1.738941127 | 2.665981190  | 0.277831021  |
| H | 1.945814140  | -1.792959128 | -0.502702035 |
| H | 3.148413228  | 2.270417164  | 0.237104015  |
| O | 4.006073291  | -0.072519006 | 0.031629004  |
| C | 4.503075325  | -1.369144101 | -0.158121009 |
| H | 5.571480402  | -1.306192096 | -0.020529003 |
| H | 4.285357311  | -1.725813123 | -1.158858085 |
| H | 4.085593296  | -2.056856149 | 0.568679039  |
| H | -0.150002012 | -0.594185044 | -1.437738104 |
| O | 0.831180060  | 3.276348236  | 0.555861038  |
| H | -0.098118008 | 3.486479251  | 0.556524039  |
| C | 3.471170249  | 5.543593401  | 1.720880122  |
| O | 2.359988171  | 5.859396424  | 0.940463068  |
| H | 1.917111138  | 5.057327363  | 0.695296052  |
| H | 3.209706231  | 4.916922356  | 2.570750182  |
| H | 3.883127281  | 6.470683466  | 2.096949152  |
| H | 4.246486305  | 5.037338364  | 1.147316083  |
| C | -4.298659308 | 5.563532403  | -0.249057018 |
| O | -4.477743324 | 4.178010303  | -0.207614015 |
| H | -3.695704267 | 3.764223270  | 0.133435012  |
| H | -5.220090378 | 5.998552430  | -0.611517044 |
| H | -3.494331252 | 5.853720421  | -0.921711068 |
| H | -4.091298292 | 5.978250428  | 0.734430054  |

#### S0-KETO

|   |              |              |              |
|---|--------------|--------------|--------------|
| C | -2.611519188 | -0.702909050 | 0.416026030  |
| C | -3.722309267 | -1.494049109 | 0.177638013  |
| C | -4.717291340 | -1.066234074 | -0.680956047 |
| C | -4.610116330 | 0.174598012  | -1.303421096 |
| C | -3.500459252 | 0.977342070  | -1.068714079 |
| C | -2.479381179 | 0.536197039  | -0.217655016 |
| C | 0.011367002  | 1.067394078  | -0.025149001 |
| C | 0.430194031  | -0.263202021 | -0.412811029 |
| C | 1.069974077  | 2.056642150  | 0.269899019  |
| C | 1.707696121  | -0.627418047 | -0.452347031 |
| C | 2.449073177  | 1.602946114  | 0.237246015  |



|   |              |              |              |
|---|--------------|--------------|--------------|
| C | 2.762397200  | 0.326607023  | -0.102378007 |
| H | -1.861971133 | -1.034032072 | 1.111184078  |
| H | -3.815631273 | -2.442894175 | 0.673873047  |
| H | -5.578295400 | -1.684541124 | -0.855018061 |
| H | -5.384957386 | 0.519255038  | -1.962581143 |
| H | -3.432964249 | 1.941186141  | -1.534327113 |
| C | -1.317771092 | 1.427928105  | 0.023350999  |
| O | -1.702131123 | 2.677761194  | 0.278511019  |
| H | 1.967895141  | -1.619117115 | -0.764833054 |
| H | 3.219111229  | 2.310687166  | 0.475157036  |
| O | 4.064676295  | -0.010627001 | -0.116938007 |
| C | 4.478374320  | -1.315829096 | -0.418769030 |
| H | 5.552343400  | -1.312456094 | -0.314319025 |
| H | 4.224321303  | -1.592607112 | -1.435949104 |
| H | 4.060354293  | -2.039750145 | 0.271593021  |
| H | -0.319766021 | -0.969083069 | -0.706132052 |
| O | 0.813908058  | 3.230410232  | 0.539201041  |
| H | -0.932742065 | 3.234980234  | 0.413852032  |
| C | 3.407998244  | 5.554712399  | 1.730660122  |
| O | 2.266502163  | 5.865824420  | 0.994396072  |
| H | 1.813629130  | 5.062804363  | 0.770384055  |
| H | 3.183386230  | 4.924698356  | 2.588815188  |
| H | 3.828472278  | 6.483168467  | 2.094007149  |
| H | 4.164198300  | 5.054511362  | 1.127197082  |
| C | -4.269606307 | 5.545711401  | -0.280331018 |
| O | -4.454673318 | 4.160483302  | -0.263649017 |
| H | -3.685316264 | 3.738294267  | 0.095327006  |
| H | -5.171266374 | 5.988058432  | -0.681470048 |
| H | -3.433295245 | 5.840904420  | -0.910528066 |
| H | -4.108574294 | 5.948627430  | 0.716704050  |

#### S2-NP-KETO

|   |              |              |              |
|---|--------------|--------------|--------------|
| C | -2.556504186 | -0.709253049 | 0.285683021  |
| C | -3.654823261 | -1.515992111 | 0.170116013  |
| C | -4.773118343 | -1.104817081 | -0.561980042 |
| C | -4.770060344 | 0.149798009  | -1.158740084 |
| C | -3.660625261 | 0.984370073  | -1.042254074 |
| C | -2.516737182 | 0.561836042  | -0.337552023 |
| C | 0.032354003  | 1.008480071  | -0.135956007 |
| C | 0.483778037  | -0.263156020 | -0.529840038 |
| C | 1.044043074  | 1.890452135  | 0.318581024  |
| C | 1.812619131  | -0.649261045 | -0.458950030 |
| C | 2.375269170  | 1.529763112  | 0.377839028  |
| C | 2.765403197  | 0.245331018  | -0.010814002 |
| H | -1.723718126 | -1.035983075 | 0.879973065  |
| H | -3.665804266 | -2.474259177 | 0.657295046  |
| H | -5.627765403 | -1.749497128 | -0.647594047 |

|   |              |              |              |
|---|--------------|--------------|--------------|
| H | -5.622884405 | 0.482591035  | -1.721080125 |
| H | -3.678552262 | 1.951851143  | -1.502692108 |
| C | -1.356914095 | 1.422165100  | -0.255724017 |
| O | -1.590419113 | 2.766000199  | -0.419165030 |
| H | 2.081637149  | -1.635935119 | -0.781162057 |
| H | 3.117712227  | 2.222343157  | 0.725030051  |
| O | 4.084247297  | -0.004940002 | 0.080436005  |
| C | 4.579869331  | -1.259516091 | -0.294417023 |
| H | 5.645303406  | -1.221381086 | -0.126693008 |
| H | 4.390487314  | -1.463888107 | -1.342871096 |
| H | 4.152065298  | -2.051125149 | 0.311024023  |
| H | -0.226300015 | -0.958368071 | -0.930864067 |
| O | 0.735429051  | 3.154083225  | 0.733991054  |
| H | -1.090065080 | 3.114565226  | -1.146707085 |
| C | 3.291122235  | 5.625018407  | 1.543939109  |
| O | 2.052108149  | 6.195105444  | 1.241245087  |
| H | 1.427526105  | 5.508461398  | 1.053291076  |
| H | 3.226947233  | 4.922317355  | 2.371761169  |
| H | 3.954340283  | 6.428646462  | 1.833258134  |
| H | 3.727517266  | 5.115268366  | 0.687152052  |
| C | -4.318231309 | 5.722307411  | -0.255362017 |
| O | -4.209594305 | 4.390597314  | -0.660715049 |
| H | -3.434083248 | 3.994525289  | -0.284704022 |
| H | -5.252948380 | 6.105300440  | -0.641119044 |
| H | -3.509587252 | 6.337775457  | -0.645169044 |
| H | -4.332387314 | 5.819461417  | 0.827200059  |

#### S1-PP-KETO

|   |              |              |              |
|---|--------------|--------------|--------------|
| C | -2.635786188 | -0.672508050 | 0.206697014  |
| C | -3.774533273 | -1.510265111 | 0.024553004  |
| C | -4.920704354 | -1.053976075 | -0.558274039 |
| C | -4.997388361 | 0.296223020  | -0.945500068 |
| C | -3.877278280 | 1.194591086  | -0.770671054 |
| C | -2.598325186 | 0.699614049  | -0.306705022 |
| C | -0.117274008 | 1.148232084  | -0.142768011 |
| C | 0.331478026  | -0.191503013 | -0.389666028 |
| C | 0.924319066  | 2.154810155  | 0.134237012  |
| C | 1.644304121  | -0.562960041 | -0.305476023 |
| C | 2.298672165  | 1.703757121  | 0.264803021  |
| C | 2.648913192  | 0.410289029  | 0.047887001  |
| H | -1.836832134 | -1.028998073 | 0.823261060  |
| H | -3.720110266 | -2.520688184 | 0.384840027  |
| H | -5.765215415 | -1.701971121 | -0.691515049 |
| H | -5.896692424 | 0.685371047  | -1.380154099 |
| H | -4.007025286 | 2.229213159  | -1.000284074 |
| C | -1.479189108 | 1.544761112  | -0.260761017 |
| O | -1.784070130 | 2.865855205  | -0.394693027 |

|   |              |              |              |
|---|--------------|--------------|--------------|
| H | 1.919123138  | -1.571076113 | -0.542699040 |
| H | 3.038310218  | 2.443452177  | 0.503044037  |
| O | 3.955194285  | 0.093156008  | 0.164223010  |
| C | 4.399741317  | -1.216021087 | -0.054307006 |
| H | 5.462319396  | -1.201911089 | 0.135099010  |
| H | 4.228593303  | -1.533498109 | -1.077625075 |
| H | 3.932161284  | -1.920182139 | 0.625678044  |
| H | -0.372779024 | -0.925755067 | -0.720476052 |
| O | 0.658249046  | 3.346554240  | 0.262067021  |
| H | -0.987026072 | 3.376814241  | -0.237622016 |
| C | 2.656111193  | 6.005083435  | 1.829757129  |
| O | 2.923659210  | 5.194923375  | 0.727122053  |
| H | 2.142245153  | 4.699605336  | 0.505378037  |
| H | 1.914941135  | 6.770430490  | 1.605878116  |
| H | 3.577790257  | 6.499892468  | 2.107922151  |
| H | 2.305170166  | 5.431832388  | 2.685268193  |
| C | -4.244869303 | 5.779828417  | -0.693238050 |
| O | -4.353598315 | 4.523321324  | -0.089960005 |
| H | -3.493088252 | 4.129923300  | -0.009919999 |
| H | -5.244085375 | 6.184853445  | -0.781812056 |
| H | -3.808767273 | 5.720562412  | -1.687925122 |
| H | -3.651505261 | 6.468444464  | -0.096766008 |

#### T1-PP-KETO

|   |              |              |              |
|---|--------------|--------------|--------------|
| C | -2.644569192 | -0.728275051 | 0.387187028  |
| C | -3.731929270 | -1.539068112 | 0.153002013  |
| C | -4.757312343 | -1.121638080 | -0.687622051 |
| C | -4.685233337 | 0.131623009  | -1.286621095 |
| C | -3.588897259 | 0.956337067  | -1.053740078 |
| C | -2.542022182 | 0.531436037  | -0.223420016 |
| C | -0.024544003 | 1.053438076  | -0.028619001 |
| C | 0.407289027  | -0.223071018 | -0.378902028 |
| C | 1.053265078  | 2.024341144  | 0.263039019  |
| C | 1.806889131  | -0.627978044 | -0.403566027 |
| C | 2.415889175  | 1.594235116  | 0.219114016  |
| C | 2.778613202  | 0.245426016  | -0.114776011 |
| H | -1.879779133 | -1.054533076 | 1.068138075  |
| H | -3.796532272 | -2.497316182 | 0.636248047  |
| H | -5.604355401 | -1.758799128 | -0.859599063 |
| H | -5.475024396 | 0.469498036  | -1.931817138 |
| H | -3.549549258 | 1.926971139  | -1.507620109 |
| C | -1.401666102 | 1.430838104  | 0.021825000  |
| O | -1.782582126 | 2.731372194  | 0.146876008  |
| H | 2.019257148  | -1.646301119 | -0.664962046 |
| H | 3.181782230  | 2.311863168  | 0.437956029  |
| O | 4.103368296  | 0.022504003  | -0.090893008 |
| C | 4.578089327  | -1.258793092 | -0.399694027 |

|   |              |              |              |
|---|--------------|--------------|--------------|
| H | 5.652243407  | -1.209961086 | -0.312042023 |
| H | 4.310949312  | -1.542177113 | -1.412130100 |
| H | 4.193362301  | -1.996792145 | 0.295919024  |
| H | -0.309556022 | -0.960684068 | -0.673054050 |
| O | 0.821174059  | 3.221138232  | 0.535095038  |
| H | -1.028187071 | 3.287926238  | 0.300659023  |
| C | 3.429554247  | 5.558772401  | 1.737109126  |
| O | 2.278880164  | 5.929631427  | 1.042281072  |
| H | 1.801987130  | 5.150099368  | 0.792734057  |
| H | 3.208504231  | 4.900366353  | 2.574527185  |
| H | 3.881163277  | 6.460897465  | 2.126710155  |
| H | 4.157675297  | 5.066121362  | 1.094222079  |
| C | -4.298487309 | 5.548618399  | -0.269717019 |
| O | -4.535530327 | 4.174030303  | -0.213512013 |
| H | -3.747636267 | 3.723205270  | 0.062874004  |
| H | -5.213506376 | 6.023369435  | -0.597957041 |
| H | -3.509881253 | 5.802358419  | -0.975643073 |
| H | -4.034928289 | 5.959594427  | 0.702422048  |

S<sub>1</sub>/T<sub>1</sub>-ENOL

|   |              |              |              |
|---|--------------|--------------|--------------|
| C | -2.469552178 | -0.786661055 | 0.212133014  |
| C | -3.585748257 | -1.587487116 | 0.103219007  |
| C | -4.770590342 | -1.103014079 | -0.489884034 |
| C | -4.825860350 | 0.271153021  | -0.904117063 |
| C | -3.769465273 | 1.083573080  | -0.784134054 |
| C | -2.486341178 | 0.581915043  | -0.280710020 |
| C | 0.068000007  | 0.956758070  | -0.161327013 |
| C | 0.552811040  | -0.272376018 | -0.598701043 |
| C | 1.014688072  | 1.851853132  | 0.391392030  |
| C | 1.897346135  | -0.633466046 | -0.491354035 |
| C | 2.345777169  | 1.511574110  | 0.489077033  |
| C | 2.795050199  | 0.260839017  | 0.040509005  |
| H | -1.588874116 | -1.163384085 | 0.693201050  |
| H | -3.557207257 | -2.593452188 | 0.479232034  |
| H | -5.633900404 | -1.732291126 | -0.579618043 |
| H | -5.748039412 | 0.653934045  | -1.299760095 |
| H | -3.851235276 | 2.115423153  | -1.059855075 |
| C | -1.342683096 | 1.376446102  | -0.387819030 |
| O | -1.492456106 | 2.583363186  | -0.921179065 |
| H | 2.205914156  | -1.595344112 | -0.851445061 |
| H | 3.048457218  | 2.203529160  | 0.911781068  |
| O | 4.114647296  | 0.044318002  | 0.181438014  |
| C | 4.661612336  | -1.177021083 | -0.228686017 |
| H | 5.718691411  | -1.117220080 | -0.018394000 |
| H | 4.517371323  | -1.338533097 | -1.291800094 |
| H | 4.233993303  | -2.007052146 | 0.323815026  |
| H | -0.119393008 | -0.965811071 | -1.064656078 |

|   |              |             |              |
|---|--------------|-------------|--------------|
| O | 0.675202049  | 3.094318221 | 0.833918060  |
| H | -0.256870019 | 3.184900227 | 0.974107072  |
| C | 3.308343240  | 5.634694408 | 1.597541113  |
| O | 2.047976148  | 5.830402422 | 1.032983074  |
| H | 1.659228120  | 4.987066361 | 0.838821062  |
| H | 3.269335236  | 4.989260357 | 2.472645176  |
| H | 3.682194266  | 6.602018475 | 1.906717139  |
| H | 4.015083290  | 5.208555372 | 0.887559064  |
| C | -4.360151313 | 5.942669428 | -0.684713047 |
| O | -4.092620293 | 4.600604332 | -0.387243026 |
| H | -3.180290231 | 4.407835316 | -0.560427039 |
| H | -5.417771392 | 6.101358440 | -0.516746039 |
| H | -4.134837298 | 6.185255445 | -1.722292126 |
| H | -3.803863276 | 6.620969477 | -0.040054003 |

$T_2/T_1$ -ENOL

|   |              |              |              |
|---|--------------|--------------|--------------|
| C | -2.683791195 | -0.781605058 | 0.403071030  |
| C | -3.813570276 | -1.559124110 | 0.145827010  |
| C | -4.799407345 | -1.092733080 | -0.716119050 |
| C | -4.656507337 | 0.153805013  | -1.316550095 |
| C | -3.541633253 | 0.920594065  | -1.072640077 |
| C | -2.526750184 | 0.460127032  | -0.218244017 |
| C | 0.006216002  | 1.014620073  | -0.006567000 |
| C | 0.439881033  | -0.321357024 | -0.350373024 |
| C | 1.077987080  | 1.961067140  | 0.239376017  |
| C | 1.740970125  | -0.683515048 | -0.409317030 |
| C | 2.396794174  | 1.576610116  | 0.179299011  |
| C | 2.759468199  | 0.257549017  | -0.129850011 |
| H | -1.941982140 | -1.132823083 | 1.096505077  |
| H | -3.925580282 | -2.513477181 | 0.627143045  |
| H | -5.672494406 | -1.687855123 | -0.907175067 |
| H | -5.419065389 | 0.523036036  | -1.977303145 |
| H | -3.453813251 | 1.886357134  | -1.535305112 |
| C | -1.359963098 | 1.332242095  | 0.054079004  |
| O | -1.716509123 | 2.597789187  | 0.416860029  |
| H | 1.986957142  | -1.690733122 | -0.685388050 |
| H | 3.165684229  | 2.302097165  | 0.363591025  |
| O | 4.078188291  | -0.007246003 | -0.146634010 |
| C | 4.531317324  | -1.295421095 | -0.455058032 |
| H | 5.607715401  | -1.255300088 | -0.389331027 |
| H | 4.246685307  | -1.587366115 | -1.460483105 |
| H | 4.159207302  | -2.028082147 | 0.253178018  |
| H | -0.306044021 | -1.047181074 | -0.599667045 |
| O | 0.851085062  | 3.268732233  | 0.538732036  |
| H | -0.054729003 | 3.509170250  | 0.401868030  |
| C | 3.473057253  | 5.636176406  | 1.707037120  |
| O | 2.319832170  | 5.866365424  | 0.958157067  |

|   |              |             |              |
|---|--------------|-------------|--------------|
| H | 1.929108136  | 5.033091362 | 0.727859054  |
| H | 3.281224234  | 4.999150362 | 2.567700185  |
| H | 3.828409274  | 6.593256475 | 2.065742147  |
| H | 4.264870309  | 5.181371373 | 1.113714080  |
| C | -4.220039301 | 5.553875400 | -0.283279022 |
| O | -4.535386327 | 4.192818302 | -0.198099017 |
| H | -3.934820283 | 3.764874269 | 0.395989029  |
| H | -4.953225355 | 6.013264430 | -0.931204069 |
| H | -3.233064231 | 5.718484413 | -0.709478050 |
| H | -4.264957305 | 6.043962436 | 0.685794050  |

T<sub>1</sub>/S<sub>0</sub>-ENOL

|   |              |              |              |
|---|--------------|--------------|--------------|
| C | -2.495403179 | -0.784348058 | 0.383046026  |
| C | -3.555586255 | -1.662881121 | 0.156119010  |
| C | -4.655586335 | -1.247907090 | -0.586536041 |
| C | -4.704632340 | 0.051733003  | -1.090059079 |
| C | -3.677123267 | 0.930044065  | -0.846250059 |
| C | -2.555387183 | 0.517088036  | -0.114793008 |
| C | -0.063991002 | 1.152610084  | -0.117662011 |
| C | 0.399085028  | -0.036183002 | -0.915823067 |
| C | 1.004707075  | 2.031166144  | 0.085667007  |
| C | 1.599824116  | -0.760871057 | -0.391817028 |
| C | 2.314765165  | 1.533206109  | -0.030784003 |
| C | 2.589171186  | 0.081224003  | -0.105440006 |
| H | -1.642773116 | -1.107157081 | 0.954657067  |
| H | -3.525374255 | -2.659514189 | 0.555286040  |
| H | -5.467262393 | -1.927478138 | -0.767370057 |
| H | -5.553908399 | 0.371533029  | -1.665260122 |
| H | -3.736418271 | 1.937859140  | -1.211194085 |
| C | -1.462696103 | 1.502445110  | 0.146326008  |
| O | -1.746886125 | 2.646054190  | 0.471765037  |
| H | 1.682192122  | -1.828356133 | -0.409442027 |
| H | 3.147376226  | 2.193654157  | 0.121930011  |
| O | 3.871148280  | -0.190908011 | 0.179007011  |
| C | 4.321430313  | -1.510325109 | 0.040256000  |
| H | 5.377397385  | -1.494890110 | 0.263361018  |
| H | 4.164680302  | -1.867262133 | -0.972053071 |
| H | 3.818590274  | -2.172976159 | 0.735294052  |
| H | 0.553923038  | 0.260413019  | -1.948816142 |
| O | 0.871722064  | 3.316845240  | 0.476744033  |
| H | -0.054130006 | 3.523860253  | 0.569829042  |
| C | 3.292251235  | 5.700649409  | 1.798847129  |
| O | 2.360778169  | 5.916639427  | 0.783921055  |
| H | 1.958977139  | 5.089335368  | 0.551586037  |
| H | 2.853114204  | 5.195245374  | 2.656301189  |
| H | 3.654536262  | 6.667422481  | 2.123015154  |
| H | 4.145453297  | 5.116762366  | 1.456597103  |

|   |              |             |              |
|---|--------------|-------------|--------------|
| C | -4.257737306 | 5.583869404 | -0.214528018 |
| O | -4.457376319 | 4.208210300 | -0.064509003 |
| H | -3.689251263 | 3.811854276 | 0.325671025  |
| H | -5.160731370 | 5.996285429 | -0.643507047 |
| H | -3.427552248 | 5.807939419 | -0.880968061 |
| H | -4.078156292 | 6.076420438 | 0.737935054  |

S<sub>1</sub>/S<sub>0</sub>-KETO

|   |              |              |              |
|---|--------------|--------------|--------------|
| C | -2.361268172 | -0.412923029 | 0.274232017  |
| C | -3.525952255 | -1.149798083 | 0.446358030  |
| C | -4.719454341 | -0.717282049 | -0.123326007 |
| C | -4.745104340 | 0.473842036  | -0.850902062 |
| C | -3.607147259 | 1.214351088  | -1.024448074 |
| C | -2.375631169 | 0.773464057  | -0.487865037 |
| C | 0.183669015  | 0.880614063  | -0.566764042 |
| C | 0.735520053  | -0.264527018 | -1.090559077 |
| C | 0.940522065  | 1.690681120  | 0.295938021  |
| C | 2.089636150  | -0.590853043 | -0.775326057 |
| C | 2.254332160  | 1.358531097  | 0.643119049  |
| C | 2.820380204  | 0.213160015  | 0.058832006  |
| H | -1.444344104 | -0.759299056 | 0.712433050  |
| H | -3.501715254 | -2.064002148 | 1.009193074  |
| H | -5.615637401 | -1.296207093 | -0.001730002 |
| H | -5.666343409 | 0.809073056  | -1.289450092 |
| H | -3.643936265 | 2.125836155  | -1.585730115 |
| C | -1.161100082 | 1.483672107  | -0.760630054 |
| O | -1.277463090 | 2.511836181  | -1.635604119 |
| H | 2.507892180  | -1.485787107 | -1.194535088 |
| H | 2.823368204  | 1.948036140  | 1.334578095  |
| O | 4.101608295  | -0.016888999 | 0.416629032  |
| C | 4.741155339  | -1.181164086 | -0.019295004 |
| H | 5.732596411  | -1.156883084 | 0.406567029  |
| H | 4.820733347  | -1.210210085 | -1.100972079 |
| H | 4.225577305  | -2.070395149 | 0.327959024  |
| H | 0.164512010  | -0.921835065 | -1.717998122 |
| O | 0.288168022  | 2.751130196  | 0.701835048  |
| H | -0.485222035 | 3.029184217  | -1.634029118 |
| C | 3.067683222  | 5.352814387  | 1.372228099  |
| O | 1.739038125  | 5.627416405  | 1.040245074  |
| H | 1.216120085  | 4.843053350  | 1.143235084  |
| H | 3.166642225  | 4.977625358  | 2.388343171  |
| H | 3.618180261  | 6.280996452  | 1.299226091  |
| H | 3.520353252  | 4.633827334  | 0.692455048  |
| C | -4.325777313 | 6.012000432  | -0.719186050 |
| O | -4.156506302 | 4.641234334  | -0.498944035 |
| H | -3.236468232 | 4.419956317  | -0.541970040 |
| H | -5.383221388 | 6.221117448  | -0.633618047 |

|   |              |             |              |
|---|--------------|-------------|--------------|
| H | -3.995207287 | 6.310935454 | -1.711337125 |
| H | -3.799327275 | 6.612594474 | 0.017817001  |

T<sub>1</sub>/S<sub>0</sub>-KETO

|   |              |              |              |
|---|--------------|--------------|--------------|
| C | -2.587998186 | -0.590960042 | 0.332717026  |
| C | -3.639730263 | -1.452526105 | 0.343815026  |
| C | -4.823980347 | -1.156304085 | -0.355040024 |
| C | -4.921975353 | 0.045266002  | -1.041327077 |
| C | -3.857878277 | 0.947642066  | -1.048952077 |
| C | -2.653758191 | 0.641994044  | -0.379545026 |
| C | -0.107633007 | 1.098730077  | -0.285974021 |
| C | 0.386298026  | -0.031917003 | -0.837489059 |
| C | 0.837778059  | 1.985693144  | 0.388810026  |
| C | 1.784094128  | -0.454196034 | -0.688140052 |
| C | 2.192360160  | 1.573430115  | 0.527966036  |
| C | 2.650684189  | 0.323067023  | -0.030117001 |
| H | -1.697698121 | -0.839067060 | 0.879797066  |
| H | -3.570290259 | -2.374280169 | 0.892125065  |
| H | -5.641459404 | -1.852586132 | -0.347591023 |
| H | -5.820845417 | 0.283978023  | -1.579468112 |
| H | -3.950017286 | 1.871328135  | -1.582938113 |
| C | -1.541429111 | 1.540555111  | -0.414681030 |
| O | -1.721796123 | 2.715771197  | -1.097087076 |
| H | 2.070795149  | -1.397205101 | -1.109886080 |
| H | 2.885694208  | 2.204798159  | 1.047951074  |
| O | 3.950085285  | 0.084116005  | 0.195062015  |
| C | 4.510251323  | -1.113295082 | -0.273703020 |
| H | 5.546573399  | -1.097543079 | 0.025960002  |
| H | 4.447123319  | -1.176253083 | -1.354439096 |
| H | 4.019093290  | -1.972554144 | 0.169211014  |
| H | -0.267275019 | -0.692901049 | -1.373826097 |
| O | 0.482637036  | 3.123937225  | 0.770030057  |
| H | -1.109442079 | 3.355967240  | -0.751548054 |
| C | 3.295239234  | 5.489293396  | 1.362540096  |
| O | 1.943695140  | 5.831201421  | 1.368208098  |
| H | 1.419580101  | 5.042773364  | 1.310497096  |
| H | 3.562500257  | 4.850640350  | 2.202868159  |
| H | 3.862678279  | 6.406412460  | 1.443278103  |
| H | 3.589487260  | 4.988850361  | 0.441203034  |
| C | -4.275253306 | 5.761686417  | -0.811152061 |
| O | -4.370696313 | 4.443316317  | -0.359280025 |
| H | -3.573729255 | 3.971995287  | -0.564273041 |
| H | -5.204299374 | 6.256419450  | -0.560900039 |
| H | -4.137820296 | 5.818736418  | -1.889043137 |
| H | -3.463238247 | 6.303387455  | -0.331540024 |

S<sub>2</sub> state minimum-energy proton transfer path



## 1.8 angstrom

|   |              |              |              |
|---|--------------|--------------|--------------|
| C | -2.667068194 | -0.714328050 | 0.410641032  |
| C | -3.757864269 | -1.547831113 | 0.192596012  |
| C | -4.769697345 | -1.159181084 | -0.680955047 |
| C | -4.696870337 | 0.058379003  | -1.319676093 |
| C | -3.613924257 | 0.904241065  | -1.101527080 |
| C | -2.579547188 | 0.520368035  | -0.245603020 |
| C | -0.094308006 | 1.050139074  | -0.028311004 |
| C | 0.375477029  | -0.266072019 | -0.436306033 |
| C | 0.984178072  | 1.973821143  | 0.259740017  |
| C | 1.761616129  | -0.649401049 | -0.432109033 |
| C | 2.381596172  | 1.569829112  | 0.227910016  |
| C | 2.738523199  | 0.220639015  | -0.116264009 |
| H | -1.900786136 | -1.013529073 | 1.102945079  |
| H | -3.824953276 | -2.489420180 | 0.706164051  |
| H | -5.610683403 | -1.807244130 | -0.843998061 |
| H | -5.480053395 | 0.365837028  | -1.988014142 |
| H | -3.579336259 | 1.861877135  | -1.584113114 |
| C | -1.454820104 | 1.473895108  | 0.000166998  |
| O | -1.739661125 | 2.673231194  | 0.204435015  |
| H | 1.985899142  | -1.660755120 | -0.710380049 |
| H | 3.136601225  | 2.291159166  | 0.463017033  |
| O | 4.059871292  | -0.012688004 | -0.078477007 |
| C | 4.534631328  | -1.286536093 | -0.417397033 |
| H | 5.607935401  | -1.242371092 | -0.318830023 |
| H | 4.275798306  | -1.541329112 | -1.439392106 |
| H | 4.142147299  | -2.041921148 | 0.254583020  |
| H | -0.335112024 | -0.979014069 | -0.795700059 |
| O | 0.773445054  | 3.239391233  | 0.575941039  |
| H | -0.173157014 | 3.413760243  | 0.544947038  |
| C | 3.514717255  | 5.477356396  | 1.705438121  |
| O | 2.377722171  | 5.864048421  | 0.996966074  |
| H | 1.889982136  | 5.091735367  | 0.744862053  |
| H | 3.273620238  | 4.830331347  | 2.546140181  |
| H | 3.980506288  | 6.373894460  | 2.091349150  |
| H | 4.239245302  | 4.965677356  | 1.073222077  |
| C | -4.264641307 | 5.493194396  | -0.229305017 |
| O | -4.444301322 | 4.109109298  | -0.233131016 |
| H | -3.645494263 | 3.680550266  | 0.049402004  |
| H | -5.194283372 | 5.943687428  | -0.551544042 |
| H | -3.477735248 | 5.808620417  | -0.911813067 |
| H | -4.030641292 | 5.873551423  | 0.762688056  |

## 1.7 angstrom

|   |              |              |              |
|---|--------------|--------------|--------------|
| C | -2.668599194 | -0.712227052 | 0.411737032  |
| C | -3.761588269 | -1.542676112 | 0.193462016  |
| C | -4.773056345 | -1.150059084 | -0.678839047 |

|   |              |              |              |
|---|--------------|--------------|--------------|
| C | -4.697405340 | 0.068216006  | -1.315907097 |
| C | -3.612115260 | 0.911080067  | -1.097505079 |
| C | -2.578218186 | 0.523089038  | -0.242996018 |
| C | -0.091406009 | 1.039915073  | -0.028831000 |
| C | 0.382305030  | -0.272213021 | -0.435656029 |
| C | 0.980775071  | 1.969747139  | 0.258188019  |
| C | 1.771991130  | -0.649281048 | -0.428610029 |
| C | 2.379981170  | 1.574523115  | 0.231060018  |
| C | 2.743908197  | 0.225368018  | -0.111451010 |
| H | -1.902627138 | -1.013601073 | 1.103464080  |
| H | -3.830639275 | -2.484956178 | 0.705568050  |
| H | -5.615801404 | -1.795709130 | -0.842490059 |
| H | -5.480225394 | 0.378754028  | -1.983226141 |
| H | -3.575319258 | 1.869219136  | -1.578917112 |
| C | -1.448537104 | 1.469125104  | 0.002341001  |
| O | -1.722933123 | 2.672674192  | 0.209104014  |
| H | 2.001645145  | -1.659807120 | -0.705588052 |
| H | 3.131042223  | 2.300605165  | 0.464955033  |
| O | 4.066216291  | -0.001433001 | -0.070954006 |
| C | 4.547622328  | -1.274345093 | -0.404712029 |
| H | 5.620587405  | -1.225367087 | -0.303262020 |
| H | 4.292886307  | -1.533319109 | -1.426776102 |
| H | 4.156421300  | -2.029455145 | 0.268408020  |
| H | -0.324619021 | -0.989628074 | -0.794313059 |
| O | 0.749029054  | 3.231316232  | 0.561006038  |
| H | -0.207625017 | 3.378143243  | 0.519226039  |
| C | 3.490464252  | 5.466201392  | 1.706749121  |
| O | 2.363622169  | 5.856312421  | 0.984283071  |
| H | 1.863524136  | 5.087477369  | 0.745417054  |
| H | 3.234808235  | 4.840153348  | 2.559079184  |
| H | 3.968604287  | 6.362931458  | 2.077036149  |
| H | 4.210450302  | 4.930499356  | 1.089159080  |
| C | -4.257081306 | 5.493524396  | -0.231041015 |
| O | -4.431274317 | 4.108648294  | -0.235622018 |
| H | -3.632064263 | 3.683120263  | 0.050396005  |
| H | -5.186690372 | 5.940188428  | -0.558475042 |
| H | -3.467676250 | 5.811856421  | -0.909251066 |
| H | -4.030004290 | 5.874813421  | 0.762157053  |

1.6 angstrom

|   |              |              |              |
|---|--------------|--------------|--------------|
| C | -2.669489191 | -0.711044050 | 0.408761029  |
| C | -3.764748272 | -1.537557110 | 0.188108013  |
| C | -4.775945346 | -1.138317080 | -0.681699049 |
| C | -4.697289339 | 0.082572008  | -1.313365094 |
| C | -3.609609261 | 0.921650065  | -1.092267076 |
| C | -2.575875185 | 0.526782039  | -0.240788015 |
| C | -0.086829006 | 1.023440071  | -0.030530003 |

|   |              |              |              |
|---|--------------|--------------|--------------|
| C | 0.392268030  | -0.282350020 | -0.432024031 |
| C | 0.976121068  | 1.962959139  | 0.253053016  |
| C | 1.786350127  | -0.650567049 | -0.421685030 |
| C | 2.377055169  | 1.580704112  | 0.230089014  |
| C | 2.751229200  | 0.231681018  | -0.106758007 |
| H | -1.904009138 | -1.016937075 | 1.099049080  |
| H | -3.835881278 | -2.481766181 | 0.696470048  |
| H | -5.620642402 | -1.780832126 | -0.847609061 |
| H | -5.479549396 | 0.398015027  | -1.979006143 |
| H | -3.570287259 | 1.881565138  | -1.569822111 |
| C | -1.438854102 | 1.461532104  | 0.003267998  |
| O | -1.696998120 | 2.671921194  | 0.212711013  |
| H | 2.023206144  | -1.660641119 | -0.693946052 |
| H | 3.122520226  | 2.313800168  | 0.460048031  |
| O | 4.074851294  | 0.014768003  | -0.062941003 |
| C | 4.565563326  | -1.256812090 | -0.388822027 |
| H | 5.637962405  | -1.200183087 | -0.285616022 |
| H | 4.314496313  | -1.522871108 | -1.409941101 |
| H | 4.177950300  | -2.010693144 | 0.287715020  |
| H | -0.309359020 | -1.006414074 | -0.788370054 |
| O | 0.713593049  | 3.215723230  | 0.540699041  |
| H | -0.260511017 | 3.320654237  | 0.487783036  |
| C | 3.463875249  | 5.445913393  | 1.705525123  |
| O | 2.346340171  | 5.843801422  | 0.973182070  |
| H | 1.830363132  | 5.081242364  | 0.747641054  |
| H | 3.194933232  | 4.839895347  | 2.568204184  |
| H | 3.957734283  | 6.340144456  | 2.061071147  |
| H | 4.175791299  | 4.886425353  | 1.099596080  |
| C | -4.247246304 | 5.498348397  | -0.229915016 |
| O | -4.408169317 | 4.111838297  | -0.233634015 |
| H | -3.605463258 | 3.693740268  | 0.053862005  |
| H | -5.180244374 | 5.935743429  | -0.560272043 |
| H | -3.459082248 | 5.823577422  | -0.906252065 |
| H | -4.026510291 | 5.882654426  | 0.763522055  |

1.5 angstrom

|   |              |              |              |
|---|--------------|--------------|--------------|
| C | -2.669432193 | -0.712091053 | 0.404403027  |
| C | -3.766740270 | -1.534522109 | 0.180657012  |
| C | -4.778376344 | -1.127639083 | -0.685481047 |
| C | -4.697175338 | 0.096862006  | -1.309716094 |
| C | -3.607258259 | 0.931801066  | -1.085010077 |
| C | -2.572988184 | 0.529249037  | -0.237730016 |
| C | -0.081935006 | 1.006974070  | -0.031645001 |
| C | 0.402340030  | -0.291043021 | -0.425825032 |
| C | 0.971808072  | 1.957305140  | 0.247152017  |
| C | 1.800958129  | -0.651924045 | -0.413716028 |
| C | 2.373705171  | 1.586514113  | 0.228829017  |

|   |              |              |              |
|---|--------------|--------------|--------------|
| C | 2.758769198  | 0.237742018  | -0.102204008 |
| H | -1.904450138 | -1.023440071 | 1.092777081  |
| H | -3.839524277 | -2.481392180 | 0.683948047  |
| H | -5.624986402 | -1.766926126 | -0.854097059 |
| H | -5.479106396 | 0.418076030  | -1.972956144 |
| H | -3.565765254 | 1.894147136  | -1.557270111 |
| C | -1.429109102 | 1.452561105  | 0.004165001  |
| O | -1.671955119 | 2.671524195  | 0.213890015  |
| H | 2.043850147  | -1.661928120 | -0.680496050 |
| H | 3.113548226  | 2.326606168  | 0.454667034  |
| O | 4.083536294  | 0.031361002  | -0.055317004 |
| C | 4.583726330  | -1.238822091 | -0.373289029 |
| H | 5.655530407  | -1.174158086 | -0.269062019 |
| H | 4.335744314  | -1.512182109 | -1.393186100 |
| H | 4.200270303  | -1.991274144 | 0.307142021  |
| H | -0.294288020 | -1.022805074 | -0.776861058 |
| O | 0.681576047  | 3.199260230  | 0.517113040  |
| H | -0.315395022 | 3.264291234  | 0.455520031  |
| C | 3.440574247  | 5.425402393  | 1.705334122  |
| O | 2.331790168  | 5.829649418  | 0.963528068  |
| H | 1.802596128  | 5.073033365  | 0.748168056  |
| H | 3.159987229  | 4.835403347  | 2.575365185  |
| H | 3.946550286  | 6.317036455  | 2.050308147  |
| H | 4.146612296  | 4.847428350  | 1.109845079  |
| C | -4.233857304 | 5.502410399  | -0.231285018 |
| O | -4.381868313 | 4.114529295  | -0.232493019 |
| H | -3.575088257 | 3.703767267  | 0.054804004  |
| H | -5.170453372 | 5.930465426  | -0.563824039 |
| H | -3.447770248 | 5.833671419  | -0.907099066 |
| H | -4.018161287 | 5.890727421  | 0.761692054  |

1.4 angstrom

|   |              |              |              |
|---|--------------|--------------|--------------|
| C | -2.660478191 | -0.735390050 | 0.390295029  |
| C | -3.760390270 | -1.548644109 | 0.152848012  |
| C | -4.775321345 | -1.119604082 | -0.701041049 |
| C | -4.691538336 | 0.118412009  | -1.297777093 |
| C | -3.598708258 | 0.942625069  | -1.058971074 |
| C | -2.561664183 | 0.518952036  | -0.224254015 |
| C | -0.064349007 | 0.987880069  | -0.022991000 |
| C | 0.428835029  | -0.301853022 | -0.389484028 |
| C | 0.974366073  | 1.961552142  | 0.233110018  |
| C | 1.831937133  | -0.647353049 | -0.382309025 |
| C | 2.374313169  | 1.608351115  | 0.219809016  |
| C | 2.778523200  | 0.260859020  | -0.089987004 |
| H | -1.897232134 | -1.062811075 | 1.072933077  |
| H | -3.835289277 | -2.505526181 | 0.636650047  |
| H | -5.624607406 | -1.752352124 | -0.880372065 |

|   |              |              |              |
|---|--------------|--------------|--------------|
| H | -5.473793393 | 0.456898035  | -1.951984141 |
| H | -3.554325257 | 1.913616139  | -1.512347111 |
| C | -1.411916101 | 1.428016102  | 0.018434001  |
| O | -1.647234117 | 2.663061190  | 0.220511017  |
| H | 2.085144150  | -1.659328119 | -0.630984046 |
| H | 3.105567223  | 2.363856171  | 0.422003028  |
| O | 4.105364295  | 0.073019004  | -0.043049003 |
| C | 4.621338333  | -1.198621088 | -0.329793025 |
| H | 5.692096407  | -1.118287081 | -0.227034016 |
| H | 4.377092314  | -1.499768108 | -1.342674094 |
| H | 4.246501307  | -1.938568137 | 0.368854027  |
| H | -0.261168017 | -1.054815075 | -0.707772052 |
| O | 0.653798047  | 3.194339230  | 0.464524034  |
| H | -0.375387027 | 3.216762233  | 0.409777028  |
| C | 3.356522241  | 5.433495391  | 1.743363128  |
| O | 2.301107164  | 5.823813419  | 0.921086068  |
| H | 1.766430128  | 5.069136366  | 0.712199053  |
| H | 3.013521217  | 4.891594351  | 2.622082191  |
| H | 3.862803276  | 6.330239454  | 2.074605151  |
| H | 4.081648295  | 4.813304344  | 1.217434085  |
| C | -4.187626300 | 5.525272396  | -0.269813017 |
| O | -4.323308310 | 4.136238300  | -0.265578017 |
| H | -3.519443253 | 3.732719269  | 0.040033005  |
| H | -5.116444367 | 5.942325426  | -0.636257043 |
| H | -3.382742243 | 5.858835422  | -0.921911066 |
| H | -4.008799289 | 5.922636429  | 0.726925051  |

1.3 angstrom

|   |              |              |              |
|---|--------------|--------------|--------------|
| C | -2.668616191 | -0.649298045 | 0.276233022  |
| C | -3.837182276 | -1.432457106 | 0.080259006  |
| C | -4.930759357 | -0.938144070 | -0.664586050 |
| C | -4.866104348 | 0.371951026  | -1.190726086 |
| C | -3.717358269 | 1.174059082  | -0.980210068 |
| C | -2.578053183 | 0.664061048  | -0.278043020 |
| C | -0.059623004 | 1.089916079  | -0.063609005 |
| C | 0.386646029  | -0.217652015 | -0.329245025 |
| C | 0.953624071  | 2.094054151  | 0.195396016  |
| C | 1.754783127  | -0.557174038 | -0.284440021 |
| C | 2.292945166  | 1.756801129  | 0.261257020  |
| C | 2.701729193  | 0.432199030  | 0.023621001  |
| H | -1.887925134 | -1.027602077 | 0.904799066  |
| H | -3.887475282 | -2.411157172 | 0.518767036  |
| H | -5.804478420 | -1.542843109 | -0.808015056 |
| H | -5.687314407 | 0.775816054  | -1.749924127 |
| H | -3.696774264 | 2.174315157  | -1.359336097 |
| C | -1.425306101 | 1.549686112  | -0.120602009 |
| O | -1.640691121 | 2.784153201  | -0.055576004 |

|   |              |              |              |
|---|--------------|--------------|--------------|
| H | 2.045856147  | -1.565237113 | -0.500099039 |
| H | 3.020246218  | 2.517104183  | 0.469822035  |
| O | 4.027192289  | 0.216468013  | 0.103856009  |
| C | 4.545723328  | -1.056176076 | -0.161887010 |
| H | 5.614425406  | -0.975135068 | -0.034775005 |
| H | 4.331735309  | -1.368587100 | -1.178537086 |
| H | 4.162226300  | -1.796543129 | 0.532035039  |
| H | -0.309626022 | -0.977561070 | -0.615850042 |
| O | 0.570385043  | 3.325343239  | 0.359566024  |
| H | -0.473791034 | 3.302677239  | 0.188300014  |
| C | 2.604592189  | 6.073086437  | 1.860258133  |
| O | 2.831708201  | 5.271928380  | 0.740478053  |
| H | 2.038472145  | 4.793931345  | 0.531129040  |
| H | 1.869664132  | 6.851482494  | 1.663761121  |
| H | 3.540920255  | 6.550011470  | 2.118443152  |
| H | 2.267980165  | 5.493473394  | 2.716856196  |
| C | -3.962119284 | 5.772214414  | -0.844731061 |
| O | -4.192426303 | 4.463730319  | -0.412292028 |
| H | -3.378357243 | 4.069506292  | -0.122916011 |
| H | -4.898123350 | 6.157496441  | -1.226613088 |
| H | -3.222918231 | 5.817632417  | -1.641505117 |
| H | -3.635063264 | 6.418937461  | -0.033927003 |

1.2 angstrom

|   |              |              |              |
|---|--------------|--------------|--------------|
| C | -2.651767193 | -0.647523047 | 0.273840019  |
| C | -3.830862275 | -1.427471102 | 0.076859005  |
| C | -4.927138356 | -0.922714066 | -0.665452048 |
| C | -4.857360350 | 0.396468030  | -1.180413083 |
| C | -3.699604267 | 1.198745085  | -0.966191067 |
| C | -2.552537182 | 0.672113046  | -0.279548021 |
| C | -0.036853004 | 1.084562081  | -0.058736002 |
| C | 0.405952029  | -0.233302015 | -0.329632023 |
| C | 0.963657070  | 2.095135149  | 0.199771016  |
| C | 1.760256127  | -0.570749043 | -0.285920019 |
| C | 2.307600169  | 1.747218126  | 0.269116022  |
| C | 2.705696197  | 0.424037032  | 0.026948002  |
| H | -1.875259134 | -1.027833073 | 0.905760063  |
| H | -3.883556280 | -2.406516171 | 0.513288035  |
| H | -5.803997419 | -1.521680110 | -0.810752056 |
| H | -5.677518410 | 0.809470060  | -1.733751126 |
| H | -3.682158266 | 2.204949159  | -1.328855096 |
| C | -1.391110101 | 1.540331110  | -0.113884008 |
| O | -1.610347118 | 2.779201203  | -0.032178004 |
| H | 2.057897147  | -1.575011112 | -0.509975036 |
| H | 3.040424217  | 2.501847182  | 0.477514034  |
| O | 4.030184289  | 0.202406017  | 0.103429006  |
| C | 4.547076328  | -1.070993076 | -0.161679012 |

|   |              |              |              |
|---|--------------|--------------|--------------|
| H | 5.615629406  | -0.990924071 | -0.032091002 |
| H | 4.335703313  | -1.383094097 | -1.178843083 |
| H | 4.161915298  | -1.811446131 | 0.530998037  |
| H | -0.294659021 | -0.986749069 | -0.623959043 |
| O | 0.578482043  | 3.317348239  | 0.357399027  |
| H | -0.533339038 | 3.265200234  | 0.177247015  |
| C | 2.584725187  | 6.059107436  | 1.854658131  |
| O | 2.812554202  | 5.258536380  | 0.735841052  |
| H | 2.028817148  | 4.756747340  | 0.542674036  |
| H | 1.833262130  | 6.823736493  | 1.665178121  |
| H | 3.514932255  | 6.554901470  | 2.100288150  |
| H | 2.269324164  | 5.477292392  | 2.718045193  |
| C | -3.951723284 | 5.803675420  | -0.866144060 |
| O | -4.172949299 | 4.494588322  | -0.427837033 |
| H | -3.363066243 | 4.121479298  | -0.102920006 |
| H | -4.882793350 | 6.168804446  | -1.278179093 |
| H | -3.190614230 | 5.853305419  | -1.641545118 |
| H | -3.659017266 | 6.462051463  | -0.051853004 |

1.1 angstrom

|   |              |              |              |
|---|--------------|--------------|--------------|
| C | -2.630567188 | -0.659274047 | 0.256284018  |
| C | -3.801668275 | -1.463082106 | 0.053284006  |
| C | -4.918128356 | -0.962551069 | -0.664998046 |
| C | -4.877117352 | 0.374097025  | -1.143053084 |
| C | -3.724309266 | 1.197175084  | -0.931424069 |
| C | -2.544236185 | 0.674823047  | -0.283600021 |
| C | -0.051631004 | 1.124988079  | -0.057556006 |
| C | 0.401182031  | -0.214194017 | -0.328521026 |
| C | 0.955004070  | 2.131621153  | 0.193259013  |
| C | 1.715498125  | -0.553004042 | -0.284556022 |
| C | 2.321402170  | 1.739285124  | 0.272838022  |
| C | 2.696481194  | 0.460712032  | 0.041419005  |
| H | -1.856801135 | -1.029894076 | 0.897123065  |
| H | -3.830070277 | -2.450042174 | 0.473159032  |
| H | -5.786836418 | -1.572264116 | -0.812358061 |
| H | -5.713915412 | 0.787736058  | -1.670189122 |
| H | -3.739675267 | 2.213762157  | -1.261367089 |
| C | -1.391192102 | 1.538945110  | -0.123947007 |
| O | -1.663780119 | 2.815331203  | -0.060838005 |
| H | 2.019176147  | -1.551852114 | -0.523680039 |
| H | 3.056354220  | 2.490119180  | 0.489887034  |
| O | 3.998507289  | 0.180621012  | 0.114194011  |
| C | 4.491382323  | -1.108957078 | -0.141128011 |
| H | 5.558424398  | -1.045930078 | 0.004092001  |
| H | 4.289368310  | -1.417201100 | -1.160433086 |
| H | 4.082600296  | -1.836960131 | 0.549703040  |
| H | -0.305393022 | -0.961164069 | -0.625187047 |

|   |              |             |              |
|---|--------------|-------------|--------------|
| O | 0.626520044  | 3.343306240 | 0.340718027  |
| H | -0.696398048 | 3.306942238 | 0.119415011  |
| C | 2.597508189  | 6.040041434 | 1.837371133  |
| O | 2.854308208  | 5.226474378 | 0.735319051  |
| H | 2.077279147  | 4.714155340 | 0.535738036  |
| H | 1.842226133  | 6.794481490 | 1.623160119  |
| H | 3.517547253  | 6.549212470 | 2.095006151  |
| H | 2.270333163  | 5.467907391 | 2.703061196  |
| C | -4.070594291 | 5.781378415 | -0.744223056 |
| O | -4.264253309 | 4.478655324 | -0.275763022 |
| H | -3.432000247 | 4.100899293 | -0.018603999 |
| H | -5.030658364 | 6.152092441 | -1.077694080 |
| H | -3.379027244 | 5.817246419 | -1.582972112 |
| H | -3.702871264 | 6.444899464 | 0.034740005  |

1.0 angstrom

|   |              |              |              |
|---|--------------|--------------|--------------|
| C | -2.614957189 | -0.660074046 | 0.246321018  |
| C | -3.783385270 | -1.471100105 | 0.048551002  |
| C | -4.906789353 | -0.973206069 | -0.653264049 |
| C | -4.882613350 | 0.362075028  | -1.125613080 |
| C | -3.733571270 | 1.194027088  | -0.922460066 |
| C | -2.542511184 | 0.678889049  | -0.286258020 |
| C | -0.061194004 | 1.148612081  | -0.062277002 |
| C | 0.387213027  | -0.200440012 | -0.341440026 |
| C | 0.979177072  | 2.161767158  | 0.199158017  |
| C | 1.692329120  | -0.552388037 | -0.296781022 |
| C | 2.347275169  | 1.728020126  | 0.281111020  |
| C | 2.695605194  | 0.453308033  | 0.043803001  |
| H | -1.834696131 | -1.027208072 | 0.880528066  |
| H | -3.802713273 | -2.460455176 | 0.462909033  |
| H | -5.771706415 | -1.589450115 | -0.798089056 |
| H | -5.726892409 | 0.769127058  | -1.645823119 |
| H | -3.759001269 | 2.208530160  | -1.256820092 |
| C | -1.398018102 | 1.541444113  | -0.137688010 |
| O | -1.724134123 | 2.837631203  | -0.106740010 |
| H | 1.986997143  | -1.552048111 | -0.542955040 |
| H | 3.093025224  | 2.465593175  | 0.505997036  |
| O | 3.989714290  | 0.138212011  | 0.120321010  |
| C | 4.458834318  | -1.157561082 | -0.147365010 |
| H | 5.526120397  | -1.115532079 | 0.004236000  |
| H | 4.257704307  | -1.451149107 | -1.171112084 |
| H | 4.034288292  | -1.886127138 | 0.533207040  |
| H | -0.324031026 | -0.937563065 | -0.649966047 |
| O | 0.688810049  | 3.354811242  | 0.349502025  |
| H | -0.882235065 | 3.356972243  | 0.039860001  |
| C | 2.611255187  | 6.054658437  | 1.841676132  |
| O | 2.906569208  | 5.253955378  | 0.740241055  |



|   |              |             |              |
|---|--------------|-------------|--------------|
| H | 2.150399156  | 4.712675337 | 0.536601040  |
| H | 1.837193133  | 6.788058490 | 1.620533119  |
| H | 3.512281251  | 6.589441472 | 2.114607152  |
| H | 2.288801163  | 5.469505395 | 2.700455193  |
| C | -4.124755296 | 5.787877415 | -0.730590053 |
| O | -4.348197315 | 4.488754323 | -0.263772019 |
| H | -3.525485256 | 4.098115297 | 0.002888001  |
| H | -5.076558368 | 6.181663443 | -1.060770076 |
| H | -3.434733247 | 5.808311420 | -1.571143112 |
| H | -3.739281268 | 6.440796461 | 0.048730001  |

S<sub>1</sub> state minimum-energy proton transfer path

2.1 angstrom

|    |   |              |              |              |
|----|---|--------------|--------------|--------------|
| 3  | C | -2.545250184 | -0.782042057 | 0.261420017  |
| 4  | C | -3.680641263 | -1.576236115 | 0.124998011  |
| 5  | C | -4.793766347 | -1.102078080 | -0.555625041 |
| 6  | C | -4.771452345 | 0.194031014  | -1.090514081 |
| 7  | C | -3.669317262 | 0.986644070  | -0.961577070 |
| 8  | C | -2.504846178 | 0.510357039  | -0.301424023 |
| 9  | C | 0.064005004  | 0.980752073  | -0.116557009 |
| 10 | C | 0.518421039  | -0.285990018 | -0.513839036 |
| 11 | C | 1.054626074  | 1.885308135  | 0.352621028  |
| 12 | C | 1.859994132  | -0.654852046 | -0.456712034 |
| 13 | C | 2.384662172  | 1.529515108  | 0.391039026  |
| 14 | C | 2.796089201  | 0.250946017  | -0.017485001 |
| 15 | H | -1.705765121 | -1.151708085 | 0.818526061  |
| 16 | H | -3.696498266 | -2.558752184 | 0.560308043  |
| 17 | H | -5.667693409 | -1.716907123 | -0.662223046 |
| 18 | H | -5.630975403 | 0.566026041  | -1.616744114 |
| 19 | H | -3.682103264 | 1.975556140  | -1.378782102 |
| 20 | C | -1.339641099 | 1.348153095  | -0.208036013 |
| 21 | O | -1.578431115 | 2.689718192  | -0.442020031 |
| 22 | H | 2.138669153  | -1.637289120 | -0.783881054 |
| 23 | H | 3.114399223  | 2.227306163  | 0.753184053  |
| 24 | O | 4.118146296  | 0.023148001  | 0.071238005  |
| 25 | C | 4.629837332  | -1.227782088 | -0.292166019 |
| 26 | H | 5.694462412  | -1.175303083 | -0.123305009 |
| 27 | H | 4.444196318  | -1.442855105 | -1.339113096 |
| 28 | H | 4.210285305  | -2.019571146 | 0.319160023  |
| 29 | H | -0.183955014 | -0.988200073 | -0.915301065 |
| 30 | O | 0.761654054  | 3.150103224  | 0.768008054  |
| 31 | H | -0.147436010 | 3.247820233  | 1.015736071  |
| 32 | C | 3.378310241  | 5.632120405  | 1.623142116  |
| 33 | O | 2.127133153  | 5.852770421  | 1.047896077  |
| 34 | H | 1.741305126  | 5.018526362  | 0.813450061  |
| 35 | H | 3.323218238  | 4.963406360  | 2.479633179  |
| 36 | H | 3.755633268  | 6.587486474  | 1.963152141  |

|    |   |              |             |              |
|----|---|--------------|-------------|--------------|
| 37 | H | 4.091381294  | 5.219862377 | 0.911312063  |
| 38 | C | -4.420860321 | 5.961699431 | -0.604660044 |
| 39 | O | -4.138316299 | 4.610204333 | -0.375253028 |
| 40 | H | -3.201185228 | 4.484727321 | -0.331363025 |
| 41 | H | -5.496695395 | 6.068141439 | -0.608186042 |
| 42 | H | -4.037447289 | 6.301702454 | -1.563657111 |
| 43 | H | -4.017269290 | 6.600492476 | 0.176879014  |

2.0 angstrom

|   |              |              |              |
|---|--------------|--------------|--------------|
| C | -2.543083182 | -0.789418058 | 0.256100018  |
| C | -3.681833267 | -1.579048115 | 0.118541006  |
| C | -4.795367347 | -1.096959079 | -0.556403037 |
| C | -4.770098345 | 0.203405013  | -1.083579076 |
| C | -3.665903264 | 0.991396071  | -0.953023068 |
| C | -2.500175178 | 0.506415039  | -0.298798023 |
| C | 0.072623005  | 0.973026069  | -0.120649010 |
| C | 0.530395039  | -0.294087023 | -0.510014037 |
| C | 1.059359078  | 1.884377138  | 0.343665025  |
| C | 1.872595134  | -0.659259050 | -0.448649034 |
| C | 2.390354172  | 1.531897110  | 0.386591027  |
| C | 2.805013204  | 0.251899018  | -0.011653002 |
| H | -1.703502121 | -1.164824082 | 0.809096059  |
| H | -3.699858266 | -2.563714184 | 0.548887038  |
| H | -5.672033408 | -1.707635123 | -0.663731048 |
| H | -5.629672405 | 0.580705042  | -1.605806116 |
| H | -3.676245266 | 1.983113141  | -1.363794098 |
| C | -1.331875095 | 1.337692097  | -0.206705016 |
| O | -1.562423112 | 2.684918195  | -0.425762028 |
| H | 2.154594155  | -1.642895117 | -0.769186056 |
| H | 3.118488223  | 2.234658160  | 0.742376053  |
| O | 4.127704295  | 0.027564002  | 0.080441006  |
| C | 4.642680332  | -1.224058088 | -0.275452020 |
| H | 5.706898410  | -1.168609086 | -0.104837009 |
| H | 4.459612320  | -1.445088106 | -1.321628096 |
| H | 4.223743304  | -2.013702147 | 0.339090024  |
| H | -0.170336013 | -1.000645073 | -0.906780068 |
| O | 0.761229056  | 3.147155226  | 0.757094054  |
| H | -0.170027010 | 3.277302237  | 0.882039063  |
| C | 3.379052243  | 5.651740408  | 1.631267119  |
| O | 2.128879152  | 5.850843422  | 1.045789073  |
| H | 1.753431127  | 5.008965362  | 0.822098060  |
| H | 3.326933237  | 4.989017359  | 2.492478179  |
| H | 3.741304270  | 6.614741473  | 1.966189142  |
| H | 4.102391297  | 5.243493379  | 0.927418065  |
| C | -4.428774320 | 5.966577429  | -0.606240046 |
| O | -4.122689298 | 4.617248333  | -0.393464028 |
| H | -3.183857229 | 4.509251326  | -0.342725027 |

|   |              |             |              |
|---|--------------|-------------|--------------|
| H | -5.506267397 | 6.053577434 | -0.612515046 |
| H | -4.047943292 | 6.325780453 | -1.559220113 |
| H | -4.039583292 | 6.601884477 | 0.185301013  |

1.9 angstrom

|   |              |              |              |
|---|--------------|--------------|--------------|
| C | -2.536483183 | -0.795151058 | 0.250650016  |
| C | -3.678359266 | -1.580371116 | 0.114206007  |
| C | -4.793393346 | -1.091133081 | -0.552660040 |
| C | -4.766871342 | 0.213246017  | -1.072006075 |
| C | -3.660759264 | 0.997504073  | -0.941299067 |
| C | -2.492705180 | 0.504325037  | -0.296250019 |
| C | 0.083964004  | 0.962658068  | -0.125583011 |
| C | 0.545732041  | -0.303065023 | -0.512302035 |
| C | 1.064727078  | 1.880610137  | 0.336596022  |
| C | 1.889165134  | -0.662475045 | -0.445249034 |
| C | 2.397111172  | 1.533851113  | 0.385286028  |
| C | 2.816527201  | 0.253599021  | -0.006687001 |
| H | -1.695191123 | -1.176293083 | 0.797011058  |
| H | -3.697122267 | -2.567530187 | 0.538797040  |
| H | -5.672259409 | -1.698612121 | -0.660284045 |
| H | -5.627635405 | 0.595590042  | -1.588427115 |
| H | -3.670414262 | 1.991955142  | -1.345615097 |
| C | -1.320325097 | 1.327970095  | -0.209711018 |
| O | -1.538972109 | 2.679693194  | -0.421135030 |
| H | 2.176360157  | -1.645812117 | -0.761967057 |
| H | 3.122227225  | 2.240823159  | 0.739028054  |
| O | 4.139665299  | 0.033750004  | 0.090008007  |
| C | 4.659637335  | -1.217258086 | -0.260710020 |
| H | 5.723125414  | -1.158100081 | -0.086920004 |
| H | 4.480625324  | -1.441789104 | -1.306847096 |
| H | 4.241236305  | -2.006464145 | 0.354749024  |
| H | -0.151725013 | -1.013086073 | -0.908908064 |
| O | 0.753568056  | 3.139014225  | 0.751087056  |
| H | -0.183536011 | 3.289794239  | 0.762324056  |
| C | 3.378158245  | 5.666608410  | 1.626182118  |
| O | 2.126092155  | 5.841075419  | 1.036966074  |
| H | 1.754690124  | 4.991048357  | 0.838749062  |
| H | 3.331842240  | 5.024748359  | 2.503248179  |
| H | 3.732730270  | 6.640385477  | 1.937221138  |
| H | 4.104390296  | 5.247125377  | 0.932022066  |
| C | -4.440011319 | 5.969456428  | -0.598164044 |
| O | -4.096765297 | 4.624175332  | -0.417763027 |
| H | -3.155911225 | 4.542810329  | -0.356940024 |
| H | -5.519397396 | 6.025083435  | -0.615552047 |
| H | -4.058735291 | 6.364923456  | -1.536421109 |
| H | -4.078680294 | 6.593871474  | 0.214886017  |

## 1.8 angstrom

|   |              |              |              |
|---|--------------|--------------|--------------|
| C | -2.495826177 | -0.776370055 | 0.228548018  |
| C | -3.652177264 | -1.538666112 | 0.086709005  |
| C | -4.767815342 | -1.014886074 | -0.552457042 |
| C | -4.726632339 | 0.302938020  | -1.037250073 |
| C | -3.606934260 | 1.065987075  | -0.900610067 |
| C | -2.437589173 | 0.536499041  | -0.285213022 |
| C | 0.148612011  | 0.958934068  | -0.118355011 |
| C | 0.607082046  | -0.306913020 | -0.505087037 |
| C | 1.129616083  | 1.878461137  | 0.340640026  |
| C | 1.950560141  | -0.667744047 | -0.432747030 |
| C | 2.460885175  | 1.530713113  | 0.394138031  |
| C | 2.877905206  | 0.247290016  | 0.008066000  |
| H | -1.655058119 | -1.185088083 | 0.755300053  |
| H | -3.681741264 | -2.535684183 | 0.486593033  |
| H | -5.657749406 | -1.605259116 | -0.664733050 |
| H | -5.587918404 | 0.711939053  | -1.532203112 |
| H | -3.606053259 | 2.071844148  | -1.276075089 |
| C | -1.251848090 | 1.337390095  | -0.197334017 |
| O | -1.444516103 | 2.698269194  | -0.373724029 |
| H | 2.236957160  | -1.652268117 | -0.746444055 |
| H | 3.186518229  | 2.237486162  | 0.747242054  |
| O | 4.200191302  | 0.023800001  | 0.111092006  |
| C | 4.716314341  | -1.231949089 | -0.227258017 |
| H | 5.778919418  | -1.177173084 | -0.047413001 |
| H | 4.542829327  | -1.463055108 | -1.272854093 |
| H | 4.290204310  | -2.014444143 | 0.391395030  |
| H | -0.090414008 | -1.015875075 | -0.903864063 |
| O | 0.808370060  | 3.134578228  | 0.753453055  |
| H | -0.128248011 | 3.289614239  | 0.702268053  |
| C | 3.327915242  | 5.769763413  | 1.622514115  |
| O | 2.086792151  | 5.872027425  | 0.994360072  |
| H | 1.754728125  | 5.000665359  | 0.819357060  |
| H | 3.281404234  | 5.160402370  | 2.522139183  |
| H | 3.636005263  | 6.767626485  | 1.905553139  |
| H | 4.088923292  | 5.353864386  | 0.964436067  |
| C | -4.415372319 | 5.992305429  | -0.649637047 |
| O | -3.861623280 | 4.706789341  | -0.686154050 |
| H | -2.916688209 | 4.766737344  | -0.685888048 |
| H | -5.490392397 | 5.879300421  | -0.620688045 |
| H | -4.150701296 | 6.572650472  | -1.530013112 |
| H | -4.107749296 | 6.541228472  | 0.236142019  |

## 4.7 angstrom

|   |              |              |              |
|---|--------------|--------------|--------------|
| C | -2.491961178 | -0.783117055 | 0.220939016  |
| C | -3.652492262 | -1.537292109 | 0.076862006  |
| C | -4.766983343 | -1.001190073 | -0.555778042 |

|   |              |              |              |
|---|--------------|--------------|--------------|
| C | -4.719078339 | 0.320235025  | -1.030409076 |
| C | -3.595225261 | 1.076557079  | -0.890459067 |
| C | -2.427614177 | 0.535005041  | -0.281950020 |
| C | 0.161616013  | 0.941970069  | -0.117466009 |
| C | 0.623614046  | -0.323446025 | -0.496567034 |
| C | 1.137842080  | 1.871424133  | 0.332095025  |
| C | 1.970089141  | -0.675379048 | -0.422084030 |
| C | 2.469787180  | 1.532527111  | 0.390393028  |
| C | 2.891657210  | 0.246982019  | 0.013881002  |
| H | -1.651417120 | -1.199777086 | 0.741744051  |
| H | -3.687098263 | -2.537973182 | 0.467970031  |
| H | -5.660611409 | -1.585680113 | -0.670849048 |
| H | -5.578444401 | 0.738112054  | -1.520868109 |
| H | -3.588638258 | 2.085719149  | -1.257502090 |
| C | -1.236884090 | 1.325006094  | -0.192713014 |
| O | -1.415746101 | 2.693854194  | -0.342040023 |
| H | 2.263321162  | -1.659777121 | -0.729496053 |
| H | 3.193089229  | 2.245267163  | 0.735923054  |
| O | 4.214546304  | 0.030241003  | 0.120197008  |
| C | 4.736881338  | -1.224731090 | -0.210933015 |
| H | 5.799100418  | -1.163689082 | -0.030613004 |
| H | 4.565152330  | -1.462543108 | -1.255305089 |
| H | 4.313951308  | -2.005918145 | 0.411530029  |
| H | -0.069637006 | -1.038921077 | -0.891045062 |
| O | 0.796336056  | 3.126654227  | 0.729505054  |
| H | -0.139293009 | 3.273672235  | 0.619463042  |
| C | 3.318630239  | 5.765547416  | 1.619676116  |
| O | 2.079224149  | 5.861796423  | 0.987359073  |
| H | 1.742360125  | 4.989023359  | 0.828431058  |
| H | 3.268214237  | 5.172573373  | 2.530206183  |
| H | 3.631150263  | 6.767335485  | 1.884121138  |
| H | 4.079002293  | 5.333356381  | 0.971123068  |
| C | -4.419018318 | 5.981081431  | -0.643203045 |
| O | -3.786477274 | 4.739906343  | -0.783924055 |
| H | -2.847732207 | 4.858776349  | -0.788384056 |
| H | -5.483590395 | 5.797008416  | -0.612809046 |
| H | -4.207754303 | 6.640001479  | -1.480659105 |
| H | -4.130577299 | 6.483075469  | 0.276534018  |

1.6 angstrom

|   |              |              |              |
|---|--------------|--------------|--------------|
| C | -2.463243178 | -0.711932052 | 0.188224014  |
| C | -3.649001264 | -1.424253101 | 0.027186000  |
| C | -4.747440340 | -0.833663060 | -0.588925043 |
| C | -4.655256335 | 0.498199038  | -1.030022073 |
| C | -3.507322252 | 1.212725085  | -0.873263060 |
| C | -2.357513172 | 0.616298044  | -0.279118022 |
| C | 0.244368016  | 0.956812067  | -0.098601009 |

|   |              |              |              |
|---|--------------|--------------|--------------|
| C | 0.690453049  | -0.315087025 | -0.470212034 |
| C | 1.230757091  | 1.880315136  | 0.343490027  |
| C | 2.035007146  | -0.678163050 | -0.395904028 |
| C | 2.558418183  | 1.529708110  | 0.403327030  |
| C | 2.965736215  | 0.237513017  | 0.033634003  |
| H | -1.637503119 | -1.169084086 | 0.698168051  |
| H | -3.715113266 | -2.432901176 | 0.393232026  |
| H | -5.660597407 | -1.384241099 | -0.717586051 |
| H | -5.499427395 | 0.956720070  | -1.510638107 |
| H | -3.462833252 | 2.227805161  | -1.223098086 |
| C | -1.144726084 | 1.368801099  | -0.169126012 |
| O | -1.286733095 | 2.747943200  | -0.269558017 |
| H | 2.318983168  | -1.667016122 | -0.697912051 |
| H | 3.289845236  | 2.237460159  | 0.742473051  |
| O | 4.287124307  | 0.008056999  | 0.139848011  |
| C | 4.795533344  | -1.254672092 | -0.181687013 |
| H | 5.858455420  | -1.203229089 | -0.002133002 |
| H | 4.621190333  | -1.499330108 | -1.224162087 |
| H | 4.364775317  | -2.026686146 | 0.447023031  |
| H | -0.009922999 | -1.027056071 | -0.858505064 |
| O | 0.889045063  | 3.139251228  | 0.725916053  |
| H | -0.049072003 | 3.281132237  | 0.592942044  |
| C | 3.292486237  | 5.849651419  | 1.646813119  |
| O | 2.076049149  | 5.897646425  | 0.966223072  |
| H | 1.778894126  | 5.011610359  | 0.802277060  |
| H | 3.227465234  | 5.259218379  | 2.557748186  |
| H | 3.558471255  | 6.863226493  | 1.917431137  |
| H | 4.092400293  | 5.442356390  | 1.030648074  |
| C | -4.232413307 | 5.901906423  | -0.756829053 |
| O | -3.428273247 | 4.922416354  | -1.354246100 |
| H | -2.515757183 | 5.114797367  | -1.193197084 |
| H | -5.261178377 | 5.632532406  | -0.951700067 |
| H | -4.048388293 | 6.887535494  | -1.176633085 |
| H | -4.088403296 | 5.947779428  | 0.319979025  |

1.5 angstrom

|   |              |              |              |
|---|--------------|--------------|--------------|
| C | -2.468687179 | -0.714477050 | 0.177250015  |
| C | -3.659565266 | -1.417108103 | 0.012166002  |
| C | -4.754881340 | -0.813136057 | -0.598157043 |
| C | -4.653227337 | 0.522869038  | -1.028138075 |
| C | -3.501271253 | 1.228010089  | -0.866202063 |
| C | -2.354278169 | 0.617367045  | -0.278568022 |
| C | 0.252099020  | 0.937604066  | -0.098511007 |
| C | 0.702552051  | -0.333556025 | -0.459805033 |
| C | 1.230810088  | 1.873374135  | 0.334563023  |
| C | 2.051074147  | -0.685106051 | -0.382187028 |
| C | 2.560013187  | 1.534613112  | 0.398669026  |

|   |              |              |              |
|---|--------------|--------------|--------------|
| C | 2.974405212  | 0.241096017  | 0.040166003  |
| H | -1.645531119 | -1.181285088 | 0.682597047  |
| H | -3.731912268 | -2.428349172 | 0.369951027  |
| H | -5.672116410 | -1.355785096 | -0.730897055 |
| H | -5.494258397 | 0.990865073  | -1.504798107 |
| H | -3.448680248 | 2.245436161  | -1.208364088 |
| C | -1.134509084 | 1.355571096  | -0.167515011 |
| O | -1.259028089 | 2.740730196  | -0.249604018 |
| H | 2.342718170  | -1.674184119 | -0.675899050 |
| H | 3.287616235  | 2.250781164  | 0.728394052  |
| O | 4.297655310  | 0.020805000  | 0.146951009  |
| C | 4.813657348  | -1.240907091 | -0.165962013 |
| H | 5.876473424  | -1.181899087 | 0.011396001  |
| H | 4.639289332  | -1.494386105 | -1.206315087 |
| H | 4.388772314  | -2.011032146 | 0.469012034  |
| H | 0.007008000  | -1.053891078 | -0.841788058 |
| O | 0.862499061  | 3.129705225  | 0.697106050  |
| H | -0.079568007 | 3.247986236  | 0.526006038  |
| C | 3.275288236  | 5.832300422  | 1.644307116  |
| O | 2.063035151  | 5.886431423  | 0.957238071  |
| H | 1.756313127  | 5.002272360  | 0.799931058  |
| H | 3.199681232  | 5.251532376  | 2.560735186  |
| H | 3.550779256  | 6.845516492  | 1.906407136  |
| H | 4.074152293  | 5.410767387  | 1.036333073  |
| C | -4.219534302 | 5.892636423  | -0.768025057 |
| O | -3.392386245 | 4.931850356  | -1.364156098 |
| H | -2.484747179 | 5.142355373  | -1.197162088 |
| H | -5.241249377 | 5.611005402  | -0.980820072 |
| H | -4.043890292 | 6.884868493  | -1.174328084 |
| H | -4.091499295 | 5.928758427  | 0.310479024  |

1.4 angstrom

|   |              |              |              |
|---|--------------|--------------|--------------|
| C | -2.479356181 | -0.709131053 | 0.146709011  |
| C | -3.683647265 | -1.385545098 | -0.027416001 |
| C | -4.772147345 | -0.747108056 | -0.617059043 |
| C | -4.647839334 | 0.596881044  | -1.017632076 |
| C | -3.482560249 | 1.276221089  | -0.847469061 |
| C | -2.343143168 | 0.631486045  | -0.278868017 |
| C | 0.271261020  | 0.917404068  | -0.095331006 |
| C | 0.720423050  | -0.356806026 | -0.441894034 |
| C | 1.249146090  | 1.862035132  | 0.322285021  |
| C | 2.071297148  | -0.703082049 | -0.363568027 |
| C | 2.577902188  | 1.527623109  | 0.390455026  |
| C | 2.992857215  | 0.229874015  | 0.046335003  |
| H | -1.662835119 | -1.201803089 | 0.637696046  |
| H | -3.773227274 | -2.402925174 | 0.308430023  |
| H | -5.700046412 | -1.269442091 | -0.756284053 |

|   |              |              |              |
|---|--------------|--------------|--------------|
| H | -5.482301393 | 1.091440078  | -1.478719109 |
| H | -3.412064246 | 2.299080166  | -1.169687083 |
| C | -1.111541082 | 1.345521094  | -0.158691012 |
| O | -1.218528090 | 2.738180197  | -0.197927013 |
| H | 2.365088170  | -1.694886121 | -0.645671048 |
| H | 3.305602240  | 2.249023163  | 0.708389051  |
| O | 4.317072311  | 0.013409002  | 0.153051009  |
| C | 4.835713350  | -1.249486092 | -0.150005012 |
| H | 5.899035425  | -1.185775088 | 0.022962001  |
| H | 4.658372337  | -1.513236108 | -1.187326085 |
| H | 4.415454320  | -2.015011146 | 0.493580035  |
| H | 0.026330002  | -1.083945076 | -0.813263060 |
| O | 0.865111064  | 3.119619223  | 0.659209048  |
| H | -0.087638007 | 3.213770233  | 0.476544036  |
| C | 3.244371235  | 5.822952421  | 1.640006117  |
| O | 2.042054146  | 5.878747425  | 0.935867068  |
| H | 1.735334122  | 4.994705358  | 0.776476055  |
| H | 3.152375226  | 5.251115379  | 2.560651184  |
| H | 3.523303251  | 6.836782490  | 1.896650134  |
| H | 4.048835289  | 5.390583387  | 1.047011076  |
| C | -4.239669306 | 5.851675421  | -0.775505057 |
| O | -3.367282240 | 4.933071353  | -1.374336097 |
| H | -2.470865177 | 5.197399374  | -1.222829089 |
| H | -5.246493375 | 5.509261397  | -0.969821070 |
| H | -4.127440299 | 6.847629491  | -1.195034086 |
| H | -4.097826297 | 5.907379423  | 0.300411019  |

### 1.3 angstrom

|   |              |              |              |
|---|--------------|--------------|--------------|
| C | -2.482255178 | -0.709259050 | 0.134873009  |
| C | -3.692816267 | -1.372573101 | -0.044779005 |
| C | -4.776926345 | -0.717056054 | -0.626547043 |
| C | -4.640432334 | 0.631845044  | -1.012233071 |
| C | -3.470124251 | 1.298387091  | -0.836054063 |
| C | -2.334632167 | 0.635412048  | -0.276293020 |
| C | 0.284993022  | 0.898563067  | -0.094605007 |
| C | 0.736518055  | -0.375301025 | -0.429632029 |
| C | 1.256730089  | 1.855975131  | 0.310365023  |
| C | 2.091487149  | -0.710787050 | -0.350543023 |
| C | 2.586013184  | 1.531665108  | 0.381757030  |
| C | 3.006541215  | 0.231982019  | 0.049748006  |
| H | -1.669533122 | -1.213668089 | 0.620047042  |
| H | -3.791180273 | -2.392641170 | 0.280180023  |
| H | -5.709732408 | -1.228963090 | -0.770900056 |
| H | -5.470951393 | 1.138700083  | -1.466923108 |
| H | -3.389486242 | 2.323742165  | -1.148026081 |
| C | -1.095771081 | 1.332240095  | -0.152769011 |
| O | -1.187537084 | 2.732095199  | -0.167735011 |



|   |              |              |              |
|---|--------------|--------------|--------------|
| H | 2.392013174  | -1.703169121 | -0.623211046 |
| H | 3.311461237  | 2.259919161  | 0.688980052  |
| O | 4.332512311  | 0.023539000  | 0.156862012  |
| C | 4.857021349  | -1.238879088 | -0.136477009 |
| H | 5.920390426  | -1.168565085 | 0.033785004  |
| H | 4.679116339  | -1.512482110 | -1.171170087 |
| H | 4.442012319  | -2.001354145 | 0.514162035  |
| H | 0.046047004  | -1.110341077 | -0.792456059 |
| O | 0.847900060  | 3.110266221  | 0.624559046  |
| H | -0.119757008 | 3.178164229  | 0.424609031  |
| C | 3.222916231  | 5.807147420  | 1.638879117  |
| O | 2.027249148  | 5.868182423  | 0.924322066  |
| H | 1.714803125  | 4.985787361  | 0.765843053  |
| H | 3.118969224  | 5.241053375  | 2.561822184  |
| H | 3.507382250  | 6.820194493  | 1.892464136  |
| H | 4.029223287  | 5.365608385  | 1.055241078  |
| C | -4.244047306 | 5.845788419  | -0.780292058 |
| O | -3.337277239 | 4.946685354  | -1.357608095 |
| H | -2.452228174 | 5.253797376  | -1.221398088 |
| H | -5.237085376 | 5.459609394  | -0.963221071 |
| H | -4.171453299 | 6.834006490  | -1.225679090 |
| H | -4.102480294 | 5.934650430  | 0.293328019  |

1.2 angstrom

|   |              |              |              |
|---|--------------|--------------|--------------|
| C | -2.488103179 | -0.712171049 | 0.113010008  |
| C | -3.707488267 | -1.355881099 | -0.072017007 |
| C | -4.790105346 | -0.672479046 | -0.629160046 |
| C | -4.639862336 | 0.686615048  | -0.981842072 |
| C | -3.462066252 | 1.333987094  | -0.800206056 |
| C | -2.326993165 | 0.642230047  | -0.266704021 |
| C | 0.298942023  | 0.874210065  | -0.088732007 |
| C | 0.753804053  | -0.397277031 | -0.417000028 |
| C | 1.264147090  | 1.843446135  | 0.306379022  |
| C | 2.114090151  | -0.720916053 | -0.338859022 |
| C | 2.595218185  | 1.529622108  | 0.378255030  |
| C | 3.021793220  | 0.230231019  | 0.053468006  |
| H | -1.677749123 | -1.237031090 | 0.579585044  |
| H | -3.815627273 | -2.382332173 | 0.228714016  |
| H | -5.730151411 | -1.169262085 | -0.778451055 |
| H | -5.468792392 | 1.214648089  | -1.414766102 |
| H | -3.371245243 | 2.365470172  | -1.088340078 |
| C | -1.079171077 | 1.315211097  | -0.141617008 |
| O | -1.153729082 | 2.723363197  | -0.138924009 |
| H | 2.421813172  | -1.712495123 | -0.606273045 |
| H | 3.317179241  | 2.265264163  | 0.675910046  |
| O | 4.350820315  | 0.030878000  | 0.157771011  |
| C | 4.881756353  | -1.228732088 | -0.133349010 |

|   |              |              |              |
|---|--------------|--------------|--------------|
| H | 5.945617427  | -1.151444084 | 0.031156004  |
| H | 4.700704337  | -1.507821106 | -1.166157085 |
| H | 4.475158320  | -1.991875141 | 0.522003040  |
| H | 0.068945006  | -1.140834080 | -0.773063057 |
| O | 0.832374058  | 3.093261222  | 0.602384042  |
| H | -0.159361009 | 3.138595228  | 0.389105026  |
| C | 3.205120233  | 5.784649418  | 1.632146120  |
| O | 2.012079144  | 5.847764420  | 0.913520066  |
| H | 1.694001119  | 4.966181360  | 0.760401052  |
| H | 3.093909220  | 5.230272378  | 2.561448183  |
| H | 3.497686252  | 6.798134490  | 1.874815133  |
| H | 4.009359291  | 5.329544384  | 1.056066076  |
| C | -4.240729306 | 5.851680422  | -0.788754057 |
| O | -3.294916235 | 4.970318357  | -1.330070098 |
| H | -2.424694177 | 5.323946382  | -1.211061087 |
| H | -5.215788373 | 5.414999387  | -0.953983070 |
| H | -4.211762302 | 6.822752493  | -1.274706092 |
| H | -4.103020293 | 5.991076430  | 0.279931018  |

1.1 angstrom

|   |              |              |              |
|---|--------------|--------------|--------------|
| C | -2.508816182 | -0.654271046 | 0.264712018  |
| C | -3.627069258 | -1.431067105 | 0.142273008  |
| C | -4.738689341 | -0.980821072 | -0.578834041 |
| C | -4.707055337 | 0.284597023  | -1.153023085 |
| C | -3.578650260 | 1.091580077  | -1.024629074 |
| C | -2.439786174 | 0.627570043  | -0.335824026 |
| C | 0.120275009  | 1.014889075  | -0.121263009 |
| C | 0.555519042  | -0.260034017 | -0.519864036 |
| C | 1.139670081  | 1.885518134  | 0.335411025  |
| C | 1.878187135  | -0.662137049 | -0.446983031 |
| C | 2.465728179  | 1.507981108  | 0.399420029  |
| C | 2.840384205  | 0.220417014  | 0.008959003  |
| H | -1.681160120 | -1.012285073 | 0.847834061  |
| H | -3.658268263 | -2.397011174 | 0.613617047  |
| H | -5.609107402 | -1.603185117 | -0.673950048 |
| H | -5.552436397 | 0.644634046  | -1.709963121 |
| H | -3.575109260 | 2.069853150  | -1.463616105 |
| C | -1.260693092 | 1.457768103  | -0.245723016 |
| O | -1.451096104 | 2.805979201  | -0.410037029 |
| H | 2.137481156  | -1.650202119 | -0.773089056 |
| H | 3.215957232  | 2.190745158  | 0.749331056  |
| O | 4.155359299  | -0.046801002 | 0.105267008  |
| C | 4.634974331  | -1.310881093 | -0.257544021 |
| H | 5.698746408  | -1.288174092 | -0.077572003 |
| H | 4.454414323  | -1.517749111 | -1.306999097 |
| H | 4.187918300  | -2.092329149 | 0.347213027  |
| H | -0.161957010 | -0.944196069 | -0.927360067 |

|   |              |             |              |
|---|--------------|-------------|--------------|
| O | 0.847887059  | 3.152257225 | 0.751457052  |
| H | -0.966086068 | 3.150333226 | -1.335341095 |
| C | 3.271171237  | 5.654298409 | 1.531211111  |
| O | 2.020888146  | 6.215055448 | 1.264668092  |
| H | 1.407214102  | 5.527184398 | 1.047312077  |
| H | 3.229338230  | 4.922086353 | 2.334705167  |
| H | 3.925314281  | 6.457816463 | 1.839771131  |
| H | 3.703972265  | 5.181119373 | 0.651903047  |
| C | -4.583702332 | 5.295345384 | -0.206274017 |
| O | -3.574127255 | 4.783457345 | -1.027028073 |
| H | -3.004258217 | 4.220751304 | -0.518641039 |
| H | -5.236789376 | 5.893365423 | -0.826697061 |
| H | -4.186326302 | 5.931663425 | 0.580634043  |
| H | -5.175444371 | 4.506646324 | 0.253104018  |

1.0 angstrom

|   |              |              |              |
|---|--------------|--------------|--------------|
| C | -2.554791186 | -0.704498053 | 0.285262019  |
| C | -3.654166261 | -1.509880108 | 0.172769011  |
| C | -4.772250344 | -1.099545078 | -0.560186041 |
| C | -4.767576344 | 0.153159009  | -1.161296084 |
| C | -3.656921264 | 0.986390070  | -1.047741076 |
| C | -2.513334181 | 0.564626039  | -0.341890022 |
| C | 0.035938004  | 1.009016075  | -0.139583009 |
| C | 0.486790035  | -0.263986019 | -0.528655036 |
| C | 1.046983077  | 1.891450137  | 0.314805021  |
| C | 1.814767131  | -0.651502047 | -0.452642031 |
| C | 2.377313170  | 1.529225109  | 0.380051026  |
| C | 2.767111201  | 0.243377020  | -0.003490998 |
| H | -1.722212125 | -1.030485077 | 0.880246062  |
| H | -3.666375264 | -2.466527178 | 0.663064046  |
| H | -5.628038406 | -1.743157124 | -0.643130045 |
| H | -5.620249403 | 0.484919034  | -1.724405125 |
| H | -3.674079264 | 1.952182143  | -1.511354110 |
| C | -1.352998099 | 1.424310104  | -0.262306018 |
| O | -1.584009115 | 2.768228199  | -0.428085032 |
| H | 2.083813147  | -1.639367119 | -0.771384057 |
| H | 3.119351226  | 2.221703160  | 0.728262054  |
| O | 4.085283293  | -0.008306003 | 0.093488009  |
| C | 4.580840329  | -1.264775091 | -0.275669019 |
| H | 5.645608408  | -1.227557087 | -0.103402007 |
| H | 4.395554319  | -1.471545106 | -1.324314094 |
| H | 4.149379300  | -2.054095146 | 0.330202026  |
| H | -0.223011015 | -0.959563069 | -0.929646065 |
| O | 0.739413052  | 3.156772228  | 0.725027051  |
| H | -1.089107078 | 3.116462226  | -1.224217090 |
| C | 3.275316235  | 5.631075407  | 1.538681109  |
| O | 2.032582149  | 6.192720448  | 1.237777087  |

|   |              |             |              |
|---|--------------|-------------|--------------|
| H | 1.413122101  | 5.502459395 | 1.046348075  |
| H | 3.216613232  | 4.924405356 | 2.363496172  |
| H | 3.931574284  | 6.438815465 | 1.831141134  |
| H | 3.715873265  | 5.128010367 | 0.680071051  |
| C | -4.329429314 | 5.715090413 | -0.256749017 |
| O | -4.202219305 | 4.388143318 | -0.673853049 |
| H | -3.426061249 | 3.996987286 | -0.294018023 |
| H | -5.264261380 | 6.091465440 | -0.649015046 |
| H | -3.523697256 | 6.342908455 | -0.632103044 |
| H | -4.356425312 | 5.801302420 | 0.826415062  |

T<sub>1</sub> state minimum-energy proton transfer path  
1.9 angstrom

|   |              |              |              |
|---|--------------|--------------|--------------|
| C | -2.578486188 | -0.735807053 | 0.390876029  |
| C | -3.664826262 | -1.583054114 | 0.168210011  |
| C | -4.704628340 | -1.179017087 | -0.660382049 |
| C | -4.668483337 | 0.078489004  | -1.256158091 |
| C | -3.611395261 | 0.926666067  | -1.023365076 |
| C | -2.547440184 | 0.524556039  | -0.206564016 |
| C | -0.033370002 | 1.089458076  | -0.026326002 |
| C | 0.351649024  | -0.275816019 | -0.541001037 |
| C | 1.005283074  | 1.986073141  | 0.199334016  |
| C | 1.743178127  | -0.749114056 | -0.360360028 |
| C | 2.353191170  | 1.565669112  | 0.104642007  |
| C | 2.690949196  | 0.139226010  | -0.102580010 |
| H | -1.777685130 | -1.052686078 | 1.033468075  |
| H | -3.698261268 | -2.548139185 | 0.638848048  |
| H | -5.537050399 | -1.835154134 | -0.834141060 |
| H | -5.472475392 | 0.393670026  | -1.895383136 |
| H | -3.605607258 | 1.906053138  | -1.462526105 |
| C | -1.440857101 | 1.499104107  | 0.050867004  |
| O | -1.738941127 | 2.665981190  | 0.277831021  |
| H | 1.945814140  | -1.792959128 | -0.502702035 |
| H | 3.148413228  | 2.270417164  | 0.237104015  |
| O | 4.006073291  | -0.072519006 | 0.031629004  |
| C | 4.503075325  | -1.369144101 | -0.158121009 |
| H | 5.571480402  | -1.306192096 | -0.020529003 |
| H | 4.285357311  | -1.725813123 | -1.158858085 |
| H | 4.085593296  | -2.056856149 | 0.568679039  |
| H | -0.150002012 | -0.594185044 | -1.437738104 |
| O | 0.831180060  | 3.276348236  | 0.555861038  |
| H | -0.098118008 | 3.486479251  | 0.556524039  |
| C | 3.471170249  | 5.543593401  | 1.720880122  |
| O | 2.359988171  | 5.859396424  | 0.940463068  |
| H | 1.917111138  | 5.057327363  | 0.695296052  |
| H | 3.209706231  | 4.916922356  | 2.570750182  |
| H | 3.883127281  | 6.470683466  | 2.096949152  |

|   |              |             |              |
|---|--------------|-------------|--------------|
| H | 4.246486305  | 5.037338364 | 1.147316083  |
| C | -4.298659308 | 5.563532403 | -0.249057018 |
| O | -4.477743324 | 4.178010303 | -0.207614015 |
| H | -3.695704267 | 3.764223270 | 0.133435012  |
| H | -5.220090378 | 5.998552430 | -0.611517044 |
| H | -3.494331252 | 5.853720421 | -0.921711068 |
| H | -4.091298292 | 5.978250428 | 0.734430054  |

4.8 angstrom

|   |              |              |              |
|---|--------------|--------------|--------------|
| C | -2.579617188 | -0.732651050 | 0.391769026  |
| C | -3.668819264 | -1.576774113 | 0.169698010  |
| C | -4.707523341 | -1.169092082 | -0.658489049 |
| C | -4.667750337 | 0.088577006  | -1.253891090 |
| C | -3.607982258 | 0.933574069  | -1.021513072 |
| C | -2.544964185 | 0.527299040  | -0.205827015 |
| C | -0.028688000 | 1.077633076  | -0.026056000 |
| C | 0.358513025  | -0.286562022 | -0.538686040 |
| C | 1.005040070  | 1.979105141  | 0.199787013  |
| C | 1.753076129  | -0.752222052 | -0.357582027 |
| C | 2.355718171  | 1.566062111  | 0.105266007  |
| C | 2.697510195  | 0.140301013  | -0.100651005 |
| H | -1.779571128 | -1.051781074 | 1.034206076  |
| H | -3.704725268 | -2.541888183 | 0.640175045  |
| H | -5.542101396 | -1.822458129 | -0.832415059 |
| H | -5.471094393 | 0.406445027  | -1.892575136 |
| H | -3.599364258 | 1.913075140  | -1.460393103 |
| C | -1.432765103 | 1.494511107  | 0.050909005  |
| O | -1.719776126 | 2.664746191  | 0.278406019  |
| H | 1.960942143  | -1.795229129 | -0.498078037 |
| H | 3.148060225  | 2.273476163  | 0.240693017  |
| O | 4.013003290  | -0.067787002 | 0.035277003  |
| C | 4.514065326  | -1.363130097 | -0.152108010 |
| H | 5.582073403  | -1.296922091 | -0.012837999 |
| H | 4.299051312  | -1.721511124 | -1.152731085 |
| H | 4.097431293  | -2.051168150 | 0.574755042  |
| H | -0.141814010 | -0.607563042 | -1.435470103 |
| O | 0.812866061  | 3.266187234  | 0.553462040  |
| H | -0.123918008 | 3.452284246  | 0.548630038  |
| C | 3.448436249  | 5.543425398  | 1.722648124  |
| O | 2.345712170  | 5.853067422  | 0.928179064  |
| H | 1.896374137  | 5.050601361  | 0.695875052  |
| H | 3.175644229  | 4.936080356  | 2.582970187  |
| H | 3.865883278  | 6.474306468  | 2.083166149  |
| H | 4.223604305  | 5.019216361  | 1.165074081  |
| C | -4.294251309 | 5.569107402  | -0.247717020 |
| O | -4.463795323 | 4.182187300  | -0.207989017 |
| H | -3.679846264 | 3.773383270  | 0.134607007  |

|   |              |             |              |
|---|--------------|-------------|--------------|
| H | -5.217800374 | 5.997971430 | -0.612159042 |
| H | -3.490202251 | 5.865464420 | -0.917972066 |
| H | -4.092349297 | 5.984260432 | 0.736721053  |

1.7 angstrom

|   |              |              |              |
|---|--------------|--------------|--------------|
| C | -2.578294186 | -0.733719052 | 0.386064030  |
| C | -3.672532262 | -1.570560112 | 0.161798013  |
| C | -4.710339337 | -1.152146085 | -0.662147045 |
| C | -4.664784336 | 0.108884008  | -1.250352090 |
| C | -3.600542259 | 0.947370069  | -1.014782075 |
| C | -2.538609184 | 0.529935036  | -0.203613017 |
| C | -0.017713002 | 1.057059077  | -0.025661001 |
| C | 0.375162026  | -0.308255024 | -0.528353040 |
| C | 1.006741073  | 1.969721141  | 0.195789015  |
| C | 1.776527126  | -0.755955053 | -0.352568025 |
| C | 2.361440170  | 1.570898113  | 0.103201010  |
| C | 2.713142197  | 0.146258009  | -0.099736005 |
| H | -1.777978130 | -1.061092075 | 1.023944075  |
| H | -3.712341267 | -2.538286185 | 0.626685047  |
| H | -5.548928397 | -1.799692130 | -0.838549059 |
| H | -5.467219392 | 0.434063031  | -1.886414137 |
| H | -3.587319257 | 1.929223137  | -1.448123102 |
| C | -1.416395100 | 1.484012109  | 0.051668004  |
| O | -1.685342123 | 2.659671191  | 0.282153023  |
| H | 1.995547144  | -1.796929132 | -0.490791033 |
| H | 3.148134225  | 2.284324165  | 0.239735016  |
| O | 4.030428288  | -0.051319001 | 0.034749001  |
| C | 4.541214325  | -1.343620099 | -0.147162013 |
| H | 5.608717404  | -1.268634090 | -0.008578000 |
| H | 4.328773314  | -1.708014125 | -1.146171081 |
| H | 4.129997300  | -2.031737148 | 0.582763044  |
| H | -0.127714008 | -0.640924048 | -1.419722101 |
| O | 0.779692055  | 3.251957235  | 0.537536038  |
| H | -0.170943011 | 3.392983247  | 0.524742040  |
| C | 3.414315244  | 5.522148398  | 1.726384126  |
| O | 2.328440169  | 5.838056420  | 0.911876066  |
| H | 1.862965134  | 5.041230362  | 0.691705050  |
| H | 3.117451226  | 4.944453358  | 2.598976185  |
| H | 3.851272277  | 6.451420462  | 2.067302150  |
| H | 4.182232301  | 4.964738357  | 1.191591084  |
| C | -4.285697307 | 5.578925402  | -0.248687018 |
| O | -4.435634320 | 4.189675301  | -0.205905016 |
| H | -3.647739260 | 3.792179275  | 0.140873011  |
| H | -5.214102378 | 5.993272431  | -0.617461043 |
| H | -3.483646248 | 5.884874425  | -0.916931069 |
| H | -4.093237293 | 5.999344433  | 0.735348055  |

## 1.6 angstrom

|   |              |              |              |
|---|--------------|--------------|--------------|
| C | -2.578087188 | -0.732773052 | 0.382271030  |
| C | -3.677273267 | -1.562581114 | 0.156877014  |
| C | -4.713461340 | -1.134987079 | -0.664481045 |
| C | -4.661408333 | 0.128082008  | -1.248088090 |
| C | -3.592587259 | 0.960250069  | -1.010647073 |
| C | -2.532396183 | 0.533026040  | -0.202798015 |
| C | -0.007515000 | 1.037188075  | -0.026937001 |
| C | 0.391022029  | -0.327977026 | -0.521462035 |
| C | 1.007168072  | 1.961019144  | 0.191904013  |
| C | 1.798335129  | -0.759303057 | -0.349237024 |
| C | 2.365953168  | 1.575154111  | 0.102318009  |
| C | 2.727184196  | 0.151750011  | -0.098641005 |
| H | -1.778190129 | -1.066716075 | 1.017241072  |
| H | -3.721769268 | -2.531791180 | 0.618332042  |
| H | -5.555947398 | -1.776965126 | -0.842685061 |
| H | -5.462382394 | 0.459768033  | -1.882522134 |
| H | -3.574331258 | 1.943609138  | -1.440355103 |
| C | -1.400413100 | 1.473647104  | 0.051208006  |
| O | -1.651587118 | 2.654750191  | 0.284257021  |
| H | 2.027943148  | -1.798154130 | -0.486007033 |
| H | 3.147462228  | 2.294421163  | 0.237652016  |
| O | 4.046024289  | -0.035854002 | 0.034975002  |
| C | 4.566453328  | -1.324763095 | -0.143404013 |
| H | 5.633409407  | -1.241375090 | -0.005394999 |
| H | 4.356576313  | -1.693586123 | -1.141316081 |
| H | 4.160594302  | -2.013947145 | 0.588519043  |
| H | -0.113767007 | -0.671943048 | -1.407557099 |
| O | 0.746180054  | 3.236218233  | 0.523430040  |
| H | -0.218448014 | 3.331930242  | 0.502307036  |
| C | 3.386043246  | 5.493954395  | 1.729233127  |
| O | 2.312407167  | 5.816944418  | 0.901795065  |
| H | 1.829331131  | 5.026791364  | 0.694938048  |
| H | 3.071638219  | 4.941048356  | 2.611767187  |
| H | 3.841865278  | 6.420067461  | 2.053787149  |
| H | 4.144785301  | 4.908847355  | 1.211079090  |
| C | -4.276267310 | 5.591024405  | -0.253691018 |
| O | -4.407931319 | 4.199737305  | -0.208300014 |
| H | -3.617144259 | 3.813478273  | 0.144322008  |
| H | -5.208556372 | 5.991919431  | -0.627387043 |
| H | -3.475463252 | 5.905914428  | -0.919148067 |
| H | -4.093760295 | 6.015989434  | 0.730217052  |

## 1.5 angstrom

|   |              |              |              |
|---|--------------|--------------|--------------|
| C | -2.574454185 | -0.734170053 | 0.373867028  |
| C | -3.680352264 | -1.554425111 | 0.146905013  |
| C | -4.715787338 | -1.113876082 | -0.668580047 |

|   |              |              |              |
|---|--------------|--------------|--------------|
| C | -4.656388335 | 0.152659011  | -1.244242088 |
| C | -3.581532260 | 0.976218071  | -1.004012074 |
| C | -2.522328183 | 0.535630036  | -0.202275014 |
| C | 0.007300000  | 1.015407070  | -0.026336003 |
| C | 0.4111113032 | -0.351405026 | -0.506927039 |
| C | 1.011559073  | 1.950813140  | 0.187271013  |
| C | 1.825411129  | -0.764490052 | -0.343560026 |
| C | 2.375482169  | 1.578169114  | 0.099095007  |
| C | 2.746628200  | 0.156000014  | -0.098873007 |
| H | -1.774486127 | -1.078415078 | 1.003084072  |
| H | -3.729780266 | -2.526364181 | 0.602188046  |
| H | -5.563504399 | -1.748434127 | -0.848646063 |
| H | -5.456342392 | 0.493402036  | -1.875057136 |
| H | -3.557769254 | 1.962140142  | -1.427252102 |
| C | -1.379860099 | 1.461250105  | 0.051163005  |
| O | -1.613357115 | 2.647847191  | 0.286412021  |
| H | 2.065294150  | -1.801337131 | -0.477630035 |
| H | 3.151280226  | 2.304632167  | 0.228415015  |
| O | 4.067367294  | -0.020423003 | 0.030787003  |
| C | 4.597166331  | -1.306184095 | -0.142225011 |
| H | 5.663706408  | -1.213907087 | -0.007066998 |
| H | 4.388025317  | -1.681669120 | -1.137826083 |
| H | 4.198156303  | -1.994726142 | 0.594096042  |
| H | -0.100744008 | -0.714490052 | -1.381396100 |
| O | 0.718571051  | 3.219180234  | 0.505437035  |
| H | -0.262303018 | 3.270466236  | 0.478768036  |
| C | 3.354346243  | 5.461951395  | 1.737430125  |
| O | 2.298972166  | 5.788519418  | 0.888542064  |
| H | 1.802064130  | 5.004085358  | 0.691026047  |
| H | 3.016725215  | 4.937904356  | 2.629045190  |
| H | 3.827345273  | 6.385310459  | 2.045379147  |
| H | 4.106449293  | 4.847495349  | 1.243823091  |
| C | -4.263426306 | 5.606298402  | -0.261878020 |
| O | -4.373020316 | 4.212995301  | -0.214594017 |
| H | -3.579434257 | 3.839658275  | 0.145586012  |
| H | -5.199523375 | 5.990989434  | -0.642921046 |
| H | -3.463105249 | 5.932580426  | -0.922318066 |
| H | -4.094811294 | 6.035894436  | 0.722443052  |

1.4 angstrom

|   |              |              |              |
|---|--------------|--------------|--------------|
| C | -2.549956184 | -0.746106054 | 0.352671024  |
| C | -3.659465262 | -1.560795114 | 0.122721009  |
| C | -4.716575342 | -1.093814078 | -0.648721046 |
| C | -4.675004336 | 0.193694013  | -1.178132086 |
| C | -3.596291257 | 1.010744072  | -0.935530067 |
| C | -2.515014181 | 0.544168041  | -0.177983010 |
| C | 0.018766001  | 1.027568072  | -0.013970999 |



|   |              |              |              |
|---|--------------|--------------|--------------|
| C | 0.449154034  | -0.331520021 | -0.486778033 |
| C | 0.999483074  | 1.987562145  | 0.190569015  |
| C | 1.875676136  | -0.707389049 | -0.331021023 |
| C | 2.376305172  | 1.652975119  | 0.083501005  |
| C | 2.777505200  | 0.235775019  | -0.098777008 |
| H | -1.734676122 | -1.110144081 | 0.949954068  |
| H | -3.697096268 | -2.548128183 | 0.544554039  |
| H | -5.567312401 | -1.723834122 | -0.830099062 |
| H | -5.490966396 | 0.554936042  | -1.775981127 |
| H | -3.585592256 | 2.010756143  | -1.324417093 |
| C | -1.368268101 | 1.461737107  | 0.075894003  |
| O | -1.599654113 | 2.648899190  | 0.326159022  |
| H | 2.137260155  | -1.741192125 | -0.448291030 |
| H | 3.129560225  | 2.408786172  | 0.177168014  |
| O | 4.101004297  | 0.085718004  | 0.032824002  |
| C | 4.653677334  | -1.193036088 | -0.117705007 |
| H | 5.718240409  | -1.080267077 | 0.018270003  |
| H | 4.453876319  | -1.588637114 | -1.107479080 |
| H | 4.264624305  | -1.876490137 | 0.628765047  |
| H | -0.065448007 | -0.722501049 | -1.347300098 |
| O | 0.663988048  | 3.241798233  | 0.503200038  |
| H | -0.338612023 | 3.237010232  | 0.480751032  |
| C | 3.017526215  | 5.560778400  | 2.041643145  |
| O | 2.704450196  | 5.393230390  | 0.692816047  |
| H | 1.982106143  | 4.780698342  | 0.612048047  |
| H | 2.153671154  | 5.864084421  | 2.634299189  |
| H | 3.764021272  | 6.342571459  | 2.109709150  |
| H | 3.432238245  | 4.653886332  | 2.485284178  |
| C | -4.162753297 | 5.685669407  | -0.314958022 |
| O | -4.303356312 | 4.296725308  | -0.221086016 |
| H | -3.526856253 | 3.920623283  | 0.171680012  |
| H | -5.072437363 | 6.073677438  | -0.752564054 |
| H | -3.327030240 | 5.970555429  | -0.950079070 |
| H | -4.030140288 | 6.148410442  | 0.659927046  |

### 1.3 angstrom

|   |              |              |              |
|---|--------------|--------------|--------------|
| C | -2.554610186 | -0.743177052 | 0.336204023  |
| C | -3.670404266 | -1.549674110 | 0.108596009  |
| C | -4.731739339 | -1.069305075 | -0.648701048 |
| C | -4.688493339 | 0.223591014  | -1.165648085 |
| C | -3.603546261 | 1.032561076  | -0.925198066 |
| C | -2.517787181 | 0.551861040  | -0.182920012 |
| C | 0.019070003  | 1.022143073  | -0.015846001 |
| C | 0.461208035  | -0.336815022 | -0.464028031 |
| C | 0.982774069  | 1.997985143  | 0.182947016  |
| C | 1.896627136  | -0.688591049 | -0.321813021 |
| C | 2.370574172  | 1.679702120  | 0.077698005  |

|   |              |              |              |
|---|--------------|--------------|--------------|
| C | 2.787680199  | 0.266721018  | -0.100460009 |
| H | -1.735288126 | -1.117430079 | 0.921228067  |
| H | -3.707384268 | -2.541991182 | 0.518865040  |
| H | -5.587475403 | -1.692770121 | -0.829173060 |
| H | -5.508857397 | 0.595904045  | -1.750775128 |
| H | -3.591651261 | 2.036784144  | -1.303067093 |
| C | -1.363538098 | 1.457810104  | 0.068340003  |
| O | -1.586743114 | 2.652176189  | 0.311696020  |
| H | 2.172196157  | -1.719104124 | -0.433754034 |
| H | 3.113031225  | 2.447037178  | 0.162449012  |
| O | 4.113856298  | 0.133008008  | 0.023260002  |
| C | 4.681386335  | -1.138672084 | -0.128909007 |
| H | 5.746005413  | -1.012492071 | -0.006641000 |
| H | 4.474287321  | -1.540563112 | -1.114531082 |
| H | 4.310365312  | -1.824151131 | 0.624800044  |
| H | -0.066689007 | -0.766237057 | -1.297071091 |
| O | 0.621780045  | 3.241854235  | 0.478400035  |
| H | -0.413173029 | 3.194370230  | 0.448666032  |
| C | 3.032087220  | 5.447561394  | 2.053407147  |
| O | 2.804952200  | 5.213436376  | 0.697174050  |
| H | 2.015113145  | 4.696157339  | 0.596161045  |
| H | 2.198450159  | 5.947191428  | 2.532573182  |
| H | 3.893800278  | 6.090278437  | 2.135885152  |
| H | 3.237456233  | 4.530419326  | 2.594312186  |
| C | -4.152366299 | 5.708981411  | -0.322095025 |
| O | -4.293600310 | 4.322232313  | -0.206878014 |
| H | -3.514309254 | 3.949921282  | 0.184138014  |
| H | -5.066763366 | 6.090761438  | -0.755243056 |
| H | -3.323417240 | 5.984527433  | -0.970379071 |
| H | -4.008272287 | 6.187577443  | 0.643742044  |

1.2 angstrom

|   |              |              |              |
|---|--------------|--------------|--------------|
| C | -2.553248185 | -0.758430052 | 0.328324024  |
| C | -3.676752266 | -1.552591110 | 0.096261009  |
| C | -4.734524341 | -1.056169075 | -0.655610045 |
| C | -4.680301337 | 0.240643015  | -1.161607081 |
| C | -3.588574259 | 1.038641074  | -0.915063068 |
| C | -2.505783182 | 0.541259038  | -0.179517010 |
| C | 0.029527000  | 0.991596073  | -0.002588000 |
| C | 0.473319034  | -0.364199024 | -0.443909030 |
| C | 0.985560071  | 1.977554144  | 0.192467015  |
| C | 1.912811139  | -0.711213053 | -0.316158022 |
| C | 2.380857170  | 1.660424119  | 0.058994003  |
| C | 2.802867200  | 0.247229018  | -0.110797010 |
| H | -1.737134124 | -1.143696082 | 0.910370064  |
| H | -3.722372266 | -2.547811185 | 0.498398035  |
| H | -5.595734405 | -1.670529119 | -0.841031059 |

|   |              |              |              |
|---|--------------|--------------|--------------|
| H | -5.497369398 | 0.624117045  | -1.743777124 |
| H | -3.568681259 | 2.045393149  | -1.285073092 |
| C | -1.342219097 | 1.429455104  | 0.076070007  |
| O | -1.560992111 | 2.631205191  | 0.325353021  |
| H | 2.188502156  | -1.742542125 | -0.420450031 |
| H | 3.119170227  | 2.434115177  | 0.119420007  |
| O | 4.130805295  | 0.119864007  | 0.004224999  |
| C | 4.700463339  | -1.151967080 | -0.139366009 |
| H | 5.765477416  | -1.021522073 | -0.024547003 |
| H | 4.488804325  | -1.563935114 | -1.120004081 |
| H | 4.335681310  | -1.831273132 | 0.623074047  |
| H | -0.069893006 | -0.817167060 | -1.254230092 |
| O | 0.621156044  | 3.205118232  | 0.489650037  |
| H | -0.476598033 | 3.129117224  | 0.452520035  |
| C | 3.004686216  | 5.439647389  | 2.046201149  |
| O | 2.675589192  | 5.300230383  | 0.697823048  |
| H | 1.946335142  | 4.695493338  | 0.611550043  |
| H | 2.152816157  | 5.737241413  | 2.653931189  |
| H | 3.757525272  | 6.211666448  | 2.125898154  |
| H | 3.417023245  | 4.523581324  | 2.466925178  |
| C | -4.166937301 | 5.709715411  | -0.336921027 |
| O | -4.273187308 | 4.319690309  | -0.219586015 |
| H | -3.490487250 | 3.968784287  | 0.183885014  |
| H | -5.085234366 | 6.066018438  | -0.782843057 |
| H | -3.337232238 | 6.004488433  | -0.975211068 |
| H | -4.048398290 | 6.192295444  | 0.630145046  |

1.1 angstrom

|   |              |              |              |
|---|--------------|--------------|--------------|
| C | -2.603848187 | -0.772234053 | 0.346748023  |
| C | -3.710376267 | -1.587976113 | 0.110351009  |
| C | -4.757616345 | -1.132252079 | -0.680236049 |
| C | -4.698368337 | 0.151416010  | -1.223305090 |
| C | -3.615164263 | 0.961893069  | -0.986405072 |
| C | -2.532665185 | 0.512787037  | -0.210368018 |
| C | -0.014260999 | 1.032781076  | -0.031181002 |
| C | 0.443357034  | -0.223953014 | -0.405450031 |
| C | 1.053582076  | 2.039582148  | 0.263717017  |
| C | 1.849092134  | -0.614543043 | -0.415385032 |
| C | 2.445458176  | 1.619544118  | 0.225201015  |
| C | 2.829135204  | 0.294952021  | -0.099274006 |
| H | -1.819509130 | -1.123270079 | 0.992146074  |
| H | -3.758192269 | -2.565741186 | 0.554560040  |
| H | -5.610998406 | -1.758661129 | -0.861067059 |
| H | -5.505590394 | 0.513148036  | -1.833432133 |
| H | -3.594406258 | 1.951447142  | -1.398576098 |
| C | -1.397168101 | 1.412708100  | 0.028592002  |
| O | -1.756516125 | 2.716081194  | 0.155997013  |

|   |              |              |              |
|---|--------------|--------------|--------------|
| H | 2.080500149  | -1.626867116 | -0.679131047 |
| H | 3.184954230  | 2.364608169  | 0.444901031  |
| O | 4.156671299  | 0.064340005  | -0.059652003 |
| C | 4.630736336  | -1.233130091 | -0.294879021 |
| H | 5.701412409  | -1.186667085 | -0.171168012 |
| H | 4.402394316  | -1.563204114 | -1.302625092 |
| H | 4.220282305  | -1.939390140 | 0.419063031  |
| H | -0.259101019 | -0.968537069 | -0.716956050 |
| O | 0.799656055  | 3.199503228  | 0.520264036  |
| H | -0.845375059 | 3.295464235  | 0.369414028  |
| C | 3.170761230  | 5.576983401  | 2.067023147  |
| O | 2.745307199  | 5.520003399  | 0.738773054  |
| H | 2.085567148  | 4.845711349  | 0.647569048  |
| H | 2.344443166  | 5.704520409  | 2.759805200  |
| H | 3.829987275  | 6.426811460  | 2.166854155  |
| H | 3.725113266  | 4.687708336  | 2.358732169  |
| C | -4.105835294 | 5.626901405  | -0.287095020 |
| O | -4.390559314 | 4.262184305  | -0.224507015 |
| H | -3.616580262 | 3.783989273  | 0.048628002  |
| H | -4.999952362 | 6.130889441  | -0.631057046 |
| H | -3.299884236 | 5.848443423  | -0.984348070 |
| H | -3.839781277 | 6.036082437  | 0.686076049  |

1.0 angstrom

|   |              |              |              |
|---|--------------|--------------|--------------|
| C | -2.629430187 | -0.753108053 | 0.362235025  |
| C | -3.721717266 | -1.586884113 | 0.124012011  |
| C | -4.769130342 | -1.152817082 | -0.677911050 |
| C | -4.725631342 | 0.127052007  | -1.229534088 |
| C | -3.655653265 | 0.955503068  | -0.991506071 |
| C | -2.572140183 | 0.527437039  | -0.206397013 |
| C | -0.058310004 | 1.078043077  | -0.038358000 |
| C | 0.402301029  | -0.177954011 | -0.401820028 |
| C | 1.000033074  | 2.096288152  | 0.249730021  |
| C | 1.809536129  | -0.560438040 | -0.416798030 |
| C | 2.395212172  | 1.678805123  | 0.224609019  |
| C | 2.783788201  | 0.355940027  | -0.104872009 |
| H | -1.844347133 | -1.086969080 | 1.015499073  |
| H | -3.758436272 | -2.561905186 | 0.574950044  |
| H | -5.611339403 | -1.793480129 | -0.860647062 |
| H | -5.534212401 | 0.471793035  | -1.847676135 |
| H | -3.646382265 | 1.942277141  | -1.411198103 |
| C | -1.447638105 | 1.442007104  | 0.026718001  |
| O | -1.826141129 | 2.743740199  | 0.124190010  |
| H | 2.046135145  | -1.571352116 | -0.681997050 |
| H | 3.131637225  | 2.425282172  | 0.451930034  |
| O | 4.113045297  | 0.131655008  | -0.072377006 |
| C | 4.598362330  | -1.142672082 | -0.390517030 |

|   |              |              |              |
|---|--------------|--------------|--------------|
| H | 5.671735408  | -1.086521079 | -0.295744020 |
| H | 4.344014312  | -1.420883105 | -1.408082101 |
| H | 4.219142303  | -1.893498138 | 0.295021021  |
| H | -0.297503021 | -0.927450065 | -0.707372052 |
| O | 0.733810054  | 3.257101234  | 0.485659035  |
| H | -1.016753075 | 3.310528239  | 0.277957018  |
| C | 3.083286220  | 5.740632412  | 1.997304145  |
| O | 3.127315228  | 5.003435359  | 0.810719056  |
| H | 2.261786162  | 4.661141336  | 0.624291044  |
| H | 2.488987180  | 6.646277479  | 1.892121134  |
| H | 4.097534297  | 6.025653433  | 2.243653162  |
| H | 2.680591192  | 5.158946370  | 2.824298201  |
| C | -4.185405301 | 5.583093403  | -0.235393016 |
| O | -4.519306324 | 4.239955305  | -0.058301003 |
| H | -3.739340271 | 3.742912270  | 0.155861009  |
| H | -5.091385364 | 6.112646442  | -0.499787036 |
| H | -3.461336252 | 5.725924412  | -1.035463073 |
| H | -3.786071273 | 6.030374435  | 0.672866049  |

S<sub>0</sub> state minimum-energy proton transfer path

1.9 angstrom

|   |              |              |              |
|---|--------------|--------------|--------------|
| C | -2.637431189 | -0.695595048 | 0.436158033  |
| C | -3.736978267 | -1.523800110 | 0.243698019  |
| C | -4.750410342 | -1.147863083 | -0.635095044 |
| C | -4.675607339 | 0.053070006  | -1.303631095 |
| C | -3.587005259 | 0.897287067  | -1.110708078 |
| C | -2.550899183 | 0.522000039  | -0.253248017 |
| C | -0.005549000 | 1.052874074  | -0.040131003 |
| C | 0.369371027  | -0.227380018 | -0.454634034 |
| C | 1.038664077  | 1.944421139  | 0.317609020  |
| C | 1.693231124  | -0.646326048 | -0.487964036 |
| C | 2.357777168  | 1.530150110  | 0.286557021  |
| C | 2.689447195  | 0.231993015  | -0.111990009 |
| H | -1.867100136 | -0.984384070 | 1.127377082  |
| H | -3.807979275 | -2.453741176 | 0.776626055  |
| H | -5.595569402 | -1.795063131 | -0.779434055 |
| H | -5.461169393 | 0.349656026  | -1.973727140 |
| H | -3.548627256 | 1.843053131  | -1.616089115 |
| C | -1.427195105 | 1.488841106  | -0.036476003 |
| O | -1.709663126 | 2.665927193  | 0.120122008  |
| H | 1.916141140  | -1.642602117 | -0.814793060 |
| H | 3.137568227  | 2.211928161  | 0.564997040  |
| O | 4.000131287  | -0.051352006 | -0.099748006 |
| C | 4.445979322  | -1.319964093 | -0.493115037 |
| H | 5.520039399  | -1.300779094 | -0.392400028 |
| H | 4.186598299  | -1.527752112 | -1.525463108 |
| H | 4.041023289  | -2.096791151 | 0.146030013  |

|   |              |              |              |
|---|--------------|--------------|--------------|
| H | -0.383459028 | -0.916571064 | -0.778715057 |
| O | 0.819464060  | 3.219030233  | 0.705953052  |
| H | -0.100960008 | 3.438381246  | 0.605170044  |
| C | 3.567884255  | 5.470021396  | 1.689361124  |
| O | 2.387378174  | 5.792071415  | 1.022001074  |
| H | 1.924343139  | 4.991646359  | 0.810230059  |
| H | 3.390906242  | 4.822152346  | 2.545209183  |
| H | 4.005295289  | 6.392334462  | 2.047926146  |
| H | 4.290869311  | 4.984147356  | 1.035644073  |
| C | -4.311069308 | 5.532672400  | -0.254039016 |
| O | -4.462977321 | 4.143584296  | -0.278974022 |
| H | -3.659670265 | 3.729799269  | 0.007872999  |
| H | -5.254252378 | 5.967519428  | -0.556090040 |
| H | -3.540258255 | 5.873784420  | -0.941803066 |
| H | -4.071159293 | 5.899610424  | 0.741088051  |

1.8 angstrom

|   |              |              |              |
|---|--------------|--------------|--------------|
| C | -2.638423189 | -0.693906052 | 0.435445030  |
| C | -3.740188267 | -1.519150108 | 0.242605019  |
| C | -4.752729340 | -1.139797083 | -0.635713044 |
| C | -4.675302337 | 0.061698003  | -1.303092096 |
| C | -3.584865256 | 0.903284064  | -1.109489081 |
| C | -2.549363182 | 0.524066037  | -0.253012020 |
| C | -0.002705001 | 1.043923078  | -0.041251002 |
| C | 0.374123029  | -0.235928020 | -0.454355031 |
| C | 1.037185074  | 1.939771137  | 0.315886025  |
| C | 1.699562121  | -0.649491047 | -0.485710037 |
| C | 2.357929169  | 1.531090109  | 0.287264023  |
| C | 2.692766195  | 0.233000018  | -0.109752007 |
| H | -1.868539133 | -0.984954073 | 1.126236080  |
| H | -3.813271275 | -2.449401177 | 0.774775057  |
| H | -5.599384405 | -1.784879131 | -0.780834057 |
| H | -5.460222393 | 0.360617028  | -1.972902142 |
| H | -3.544456255 | 1.849762135  | -1.613408118 |
| C | -1.421440101 | 1.484743109  | -0.035797005 |
| O | -1.695457124 | 2.664026192  | 0.123917008  |
| H | 1.926835140  | -1.645206119 | -0.811217060 |
| H | 3.135710228  | 2.215490159  | 0.564962040  |
| O | 4.004064291  | -0.047031004 | -0.096307005 |
| C | 4.453813320  | -1.314589097 | -0.488812037 |
| H | 5.527768398  | -1.292176090 | -0.387627029 |
| H | 4.195525303  | -1.523616110 | -1.521173110 |
| H | 4.050864293  | -2.092227150 | 0.150587012  |
| H | -0.376768026 | -0.927414065 | -0.778435058 |
| O | 0.801576059  | 3.212128233  | 0.698759052  |
| H | -0.125036011 | 3.409782243  | 0.590431045  |
| C | 3.551017254  | 5.468734395  | 1.686983123  |

|   |              |             |              |
|---|--------------|-------------|--------------|
| O | 2.373652173  | 5.787218415 | 1.012581073  |
| H | 1.905919139  | 4.986650359 | 0.811114061  |
| H | 3.368913244  | 4.834756348 | 2.552201181  |
| H | 3.992883289  | 6.394025458 | 2.032539148  |
| H | 4.272785308  | 4.969270358 | 1.042073074  |
| C | -4.306445310 | 5.539796401 | -0.252032016 |
| O | -4.452288322 | 4.149927300 | -0.278954019 |
| H | -3.648453263 | 3.739527272 | 0.011243000  |
| H | -5.250635378 | 5.970907432 | -0.556276040 |
| H | -3.535080255 | 5.884958421 | -0.937198065 |
| H | -4.070935292 | 5.906533427 | 0.744228051  |

1.7 angstrom

|   |              |              |              |
|---|--------------|--------------|--------------|
| C | -2.641232189 | -0.691243052 | 0.432645032  |
| C | -3.747943269 | -1.508648109 | 0.234867019  |
| C | -4.754765344 | -1.119984079 | -0.645929049 |
| C | -4.667592335 | 0.082887006  | -1.309827094 |
| C | -3.573244259 | 0.917833067  | -1.109879079 |
| C | -2.543501184 | 0.528725041  | -0.251057017 |
| C | 0.006625003  | 1.026316075  | -0.042243003 |
| C | 0.388417027  | -0.254339017 | -0.447361033 |
| C | 1.038645074  | 1.934319140  | 0.304471020  |
| C | 1.716876124  | -0.656015045 | -0.480088037 |
| C | 2.363237171  | 1.537465113  | 0.274889017  |
| C | 2.704541193  | 0.238315016  | -0.113526009 |
| H | -1.874455133 | -0.988979070 | 1.124047080  |
| H | -3.828740274 | -2.439980176 | 0.764067055  |
| H | -5.605068404 | -1.759079126 | -0.795908057 |
| H | -5.448244392 | 0.387930030  | -1.981802141 |
| H | -3.525260255 | 1.865826136  | -1.610285115 |
| C | -1.406582100 | 1.475419107  | -0.029545003 |
| O | -1.663217122 | 2.657779191  | 0.144988010  |
| H | 1.952619143  | -1.651854120 | -0.799118057 |
| H | 3.137439224  | 2.229989160  | 0.542275037  |
| O | 4.017833287  | -0.033045002 | -0.102493008 |
| C | 4.475770324  | -1.300170096 | -0.486711034 |
| H | 5.549843397  | -1.269036090 | -0.388675027 |
| H | 4.216404303  | -1.518982110 | -1.516799111 |
| H | 4.080419292  | -2.076090149 | 0.159543014  |
| H | -0.359437026 | -0.953028069 | -0.763542053 |
| O | 0.771413056  | 3.202911230  | 0.670298047  |
| H | -0.168113013 | 3.355909242  | 0.554002039  |
| C | 3.503101254  | 5.471436395  | 1.679003120  |
| O | 2.320295168  | 5.793101416  | 1.016073072  |
| H | 1.851425133  | 4.993315357  | 0.814015058  |
| H | 3.327489238  | 4.840390350  | 2.547661184  |
| H | 3.952678285  | 6.395538461  | 2.017643147  |

|   |              |             |              |
|---|--------------|-------------|--------------|
| H | 4.216160305  | 4.967536355 | 1.028126073  |
| C | -4.313078308 | 5.540141398 | -0.254606018 |
| O | -4.431373321 | 4.147451301 | -0.280759022 |
| H | -3.625640263 | 3.752352268 | 0.024730003  |
| H | -5.260806376 | 5.951580429 | -0.574359043 |
| H | -3.538128253 | 5.898937427 | -0.928508064 |
| H | -4.100426293 | 5.913107428 | 0.744338051  |

1.6 angstrom

|   |              |              |              |
|---|--------------|--------------|--------------|
| C | -2.641898191 | -0.688497051 | 0.429537031  |
| C | -3.752655270 | -1.499541107 | 0.229164018  |
| C | -4.757336341 | -1.102213079 | -0.650544046 |
| C | -4.664405334 | 0.102864008  | -1.309550096 |
| C | -3.566507256 | 0.932475068  | -1.106115078 |
| C | -2.538903184 | 0.533963038  | -0.249418018 |
| C | 0.014176002  | 1.009990073  | -0.043392005 |
| C | 0.399716030  | -0.270286022 | -0.444775034 |
| C | 1.037692074  | 1.928530137  | 0.299011022  |
| C | 1.731205127  | -0.660330047 | -0.474988033 |
| C | 2.365406168  | 1.542770109  | 0.272594018  |
| C | 2.712741197  | 0.243182018  | -0.110929008 |
| H | -1.876119137 | -0.992177073 | 1.119403079  |
| H | -3.837948276 | -2.432317176 | 0.755191053  |
| H | -5.610733405 | -1.736459127 | -0.803529056 |
| H | -5.443208392 | 0.414193028  | -1.980703140 |
| H | -3.514448253 | 1.882484133  | -1.602275117 |
| C | -1.393315103 | 1.467305105  | -0.024838003 |
| O | -1.633383119 | 2.653204190  | 0.161017011  |
| H | 1.975942143  | -1.655108121 | -0.790413059 |
| H | 3.136125224  | 2.240416164  | 0.536409038  |
| O | 4.027220288  | -0.021561999 | -0.098798006 |
| C | 4.492558324  | -1.287492094 | -0.478239033 |
| H | 5.566466400  | -1.249982090 | -0.380253028 |
| H | 4.234594305  | -1.511526109 | -1.507496106 |
| H | 4.101598294  | -2.063183146 | 0.170867010  |
| H | -0.343777026 | -0.974877073 | -0.758788056 |
| O | 0.738223054  | 3.190702232  | 0.651386046  |
| H | -0.215546017 | 3.297563238  | 0.527856036  |
| C | 3.478550250  | 5.455573391  | 1.670022119  |
| O | 2.299615164  | 5.780517417  | 1.002136072  |
| H | 1.818621129  | 4.984308358  | 0.812727056  |
| H | 3.296191235  | 4.841209347  | 2.549381185  |
| H | 3.939232283  | 6.380009458  | 1.992979142  |
| H | 4.185773301  | 4.932582357  | 1.027469073  |
| C | -4.309177309 | 5.550321398  | -0.254793019 |
| O | -4.409862319 | 4.155881301  | -0.279450022 |
| H | -3.602792257 | 3.771947273  | 0.036402002  |



|   |              |             |              |
|---|--------------|-------------|--------------|
| H | -5.259401379 | 5.949318429 | -0.582752043 |
| H | -3.533326255 | 5.917391425 | -0.923067064 |
| H | -4.109090295 | 5.927222427 | 0.745196054  |

1.5 angstrom

|   |              |              |              |
|---|--------------|--------------|--------------|
| C | -2.640358190 | -0.695429051 | 0.419278030  |
| C | -3.758574271 | -1.493941109 | 0.210102016  |
| C | -4.759605342 | -1.076981077 | -0.664905048 |
| C | -4.655619335 | 0.134548009  | -1.310472092 |
| C | -3.551083258 | 0.952672070  | -1.096978076 |
| C | -2.527842184 | 0.534596040  | -0.244403015 |
| C | 0.029615003  | 0.990863073  | -0.037486001 |
| C | 0.421849033  | -0.292243020 | -0.424499030 |
| C | 1.044127076  | 1.925333139  | 0.287941021  |
| C | 1.755649126  | -0.668434047 | -0.455692034 |
| C | 2.376351173  | 1.552256114  | 0.260319021  |
| C | 2.731290198  | 0.250585018  | -0.107648009 |
| H | -1.877543137 | -1.013553071 | 1.105823078  |
| H | -3.851822277 | -2.431966173 | 0.725458050  |
| H | -5.619200405 | -1.701133122 | -0.824686060 |
| H | -5.431213389 | 0.459661033  | -1.978779142 |
| H | -3.491129254 | 1.908054137  | -1.581521114 |
| C | -1.372969100 | 1.452188104  | -0.011916003 |
| O | -1.597979114 | 2.640345188  | 0.190936015  |
| H | 2.009825146  | -1.664517120 | -0.759361055 |
| H | 3.142833229  | 2.260067161  | 0.509008039  |
| O | 4.047748291  | -0.003969999 | -0.098685006 |
| C | 4.522253328  | -1.271109089 | -0.462157035 |
| H | 5.596089403  | -1.222910085 | -0.368468029 |
| H | 4.262942304  | -1.511746109 | -1.487371109 |
| H | 4.140366300  | -2.041139146 | 0.199067014  |
| H | -0.317108022 | -1.007249073 | -0.725514052 |
| O | 0.712914051  | 3.182653229  | 0.616791046  |
| H | -0.258404019 | 3.240121233  | 0.500509034  |
| C | 3.433760248  | 5.447940390  | 1.655922117  |
| O | 2.244380162  | 5.774978418  | 1.008484072  |
| H | 1.765348125  | 4.978418356  | 0.814728061  |
| H | 3.266104233  | 4.829212349  | 2.535141184  |
| H | 3.899544280  | 6.370837456  | 1.976058144  |
| H | 4.131210296  | 4.928573352  | 1.000070074  |
| C | -4.304882311 | 5.560907398  | -0.272051019 |
| O | -4.370646316 | 4.164113299  | -0.293476019 |
| H | -3.565591255 | 3.799705271  | 0.049301005  |
| H | -5.256265379 | 5.934338427  | -0.625277044 |
| H | -3.521793255 | 5.944469430  | -0.922229064 |
| H | -4.139547298 | 5.945965430  | 0.731022052  |

1.4 angstrom

|   |              |              |              |
|---|--------------|--------------|--------------|
| C | -2.637008191 | -0.696785051 | 0.414959028  |
| C | -3.762973269 | -1.481955107 | 0.197107016  |
| C | -4.758847343 | -1.046200074 | -0.674765049 |
| C | -4.643015333 | 0.170780014  | -1.307851093 |
| C | -3.531461254 | 0.976806072  | -1.084836078 |
| C | -2.513262181 | 0.539267040  | -0.235945017 |
| C | 0.048655001  | 0.972078069  | -0.031403003 |
| C | 0.444411034  | -0.313158021 | -0.409743029 |
| C | 1.055525077  | 1.920421136  | 0.277905021  |
| C | 1.779495128  | -0.677152046 | -0.445703031 |
| C | 2.391588171  | 1.557680112  | 0.244690020  |
| C | 2.751246197  | 0.254510020  | -0.112556006 |
| H | -1.877945137 | -1.028581076 | 1.099082080  |
| H | -3.865848279 | -2.424035176 | 0.703128050  |
| H | -5.624219402 | -1.660313119 | -0.842009058 |
| H | -5.414811392 | 0.509790036  | -1.973587140 |
| H | -3.462850249 | 1.936834140  | -1.558716114 |
| C | -1.347699098 | 1.438457102  | 0.005076000  |
| O | -1.556444113 | 2.628976190  | 0.224170019  |
| H | 2.041081148  | -1.673722121 | -0.741258055 |
| H | 3.155309228  | 2.272818163  | 0.480386032  |
| O | 4.068931293  | 0.007126001  | -0.109483010 |
| C | 4.548894328  | -1.262135090 | -0.458146036 |
| H | 5.622837403  | -1.206611087 | -0.370004024 |
| H | 4.286549309  | -1.518017108 | -1.478874105 |
| H | 4.174422301  | -2.025321143 | 0.215124014  |
| H | -0.291636022 | -1.036290077 | -0.698582053 |
| O | 0.696823052  | 3.170305227  | 0.590672043  |
| H | -0.296201022 | 3.181347230  | 0.482406034  |
| C | 3.383500242  | 5.456905394  | 1.636677115  |
| O | 2.175800156  | 5.770606414  | 1.018045072  |
| H | 1.707672123  | 4.968035359  | 0.820404058  |
| H | 3.245009233  | 4.827085347  | 2.513064179  |
| H | 3.841280278  | 6.384179459  | 1.956157143  |
| H | 4.075417291  | 4.955428357  | 0.961336067  |
| C | -4.308581312 | 5.578373401  | -0.295614022 |
| O | -4.333238310 | 4.179920299  | -0.311598022 |
| H | -3.530939253 | 3.839738276  | 0.060923002  |
| H | -5.258149377 | 5.921740426  | -0.682061049 |
| H | -3.515722253 | 5.981321429  | -0.921576065 |
| H | -4.188107301 | 5.972293432  | 0.710199049  |

1.3 angstrom

|   |              |              |              |
|---|--------------|--------------|--------------|
| C | -2.634276191 | -0.693781050 | 0.413539029  |
| C | -3.763747270 | -1.473471105 | 0.194000015  |
| C | -4.757605343 | -1.030251074 | -0.676575047 |

|   |              |              |              |
|---|--------------|--------------|--------------|
| C | -4.637406335 | 0.188477013  | -1.305516093 |
| C | -3.523139254 | 0.990367070  | -1.080488077 |
| C | -2.506497179 | 0.544392037  | -0.234014017 |
| C | 0.056747005  | 0.958115071  | -0.031361002 |
| C | 0.455580034  | -0.328004025 | -0.408772031 |
| C | 1.055681073  | 1.916778137  | 0.277221022  |
| C | 1.791032129  | -0.682859048 | -0.443382033 |
| C | 2.394995173  | 1.558475111  | 0.244914015  |
| C | 2.758491200  | 0.256184020  | -0.110303008 |
| H | -1.875446134 | -1.030067074 | 1.095587081  |
| H | -3.870688277 | -2.416617175 | 0.697092048  |
| H | -5.625434404 | -1.640243119 | -0.846213059 |
| H | -5.408019391 | 0.532515040  | -1.969954143 |
| H | -3.451201248 | 1.951816143  | -1.551124114 |
| C | -1.332052094 | 1.428730105  | 0.007934002  |
| O | -1.525724109 | 2.623211190  | 0.234833020  |
| H | 2.059503147  | -1.677881121 | -0.737758055 |
| H | 3.156412229  | 2.276276162  | 0.479438033  |
| O | 4.076729291  | 0.012581999  | -0.106790006 |
| C | 4.561570329  | -1.255565090 | -0.452603031 |
| H | 5.635317408  | -1.195930084 | -0.364057024 |
| H | 4.300923308  | -1.514535111 | -1.472917104 |
| H | 4.189791302  | -2.018780148 | 0.222034016  |
| H | -0.277462020 | -1.054763078 | -0.696886050 |
| O | 0.673019050  | 3.155550226  | 0.582633041  |
| H | -0.349528024 | 3.126677225  | 0.465244033  |
| C | 3.364010242  | 5.444108390  | 1.625486117  |
| O | 2.155608154  | 5.754716412  | 1.007094072  |
| H | 1.684554120  | 4.951457358  | 0.816444061  |
| H | 3.227102234  | 4.820393345  | 2.506818178  |
| H | 3.823502277  | 6.373242461  | 1.937565140  |
| H | 4.054635294  | 4.937165354  | 0.952399068  |
| C | -4.307972309 | 5.598735401  | -0.300659023 |
| O | -4.316628310 | 4.199474304  | -0.309029020 |
| H | -3.514874252 | 3.871986280  | 0.075462004  |
| H | -5.257778376 | 5.929044426  | -0.697749048 |
| H | -3.513781252 | 6.006773431  | -0.921410067 |
| H | -4.201232305 | 5.999075431  | 0.704129053  |

1.2 angstrom

|   |              |              |              |
|---|--------------|--------------|--------------|
| C | -2.617470189 | -0.699280048 | 0.398341026  |
| C | -3.761700269 | -1.460721103 | 0.178613012  |
| C | -4.753193344 | -0.994164070 | -0.679339051 |
| C | -4.621736333 | 0.230491014  | -1.295115093 |
| C | -3.496013253 | 1.019441073  | -1.068193078 |
| C | -2.478556176 | 0.547588040  | -0.235110017 |
| C | 0.085728006  | 0.943945070  | -0.024270000 |

|   |              |              |              |
|---|--------------|--------------|--------------|
| C | 0.487915034  | -0.345240026 | -0.396912031 |
| C | 1.076214077  | 1.915865137  | 0.276077020  |
| C | 1.823073134  | -0.689425048 | -0.434630034 |
| C | 2.420750176  | 1.561080113  | 0.238449015  |
| C | 2.787112201  | 0.260616017  | -0.109619009 |
| H | -1.858386132 | -1.054333074 | 1.070036075  |
| H | -3.876580279 | -2.407996174 | 0.672003046  |
| H | -5.630869403 | -1.589664114 | -0.850532061 |
| H | -5.392398386 | 0.591076043  | -1.950445140 |
| H | -3.417806248 | 1.986691141  | -1.525464108 |
| C | -1.292971095 | 1.411391099  | 0.015828999  |
| O | -1.480109104 | 2.606882188  | 0.257578021  |
| H | 2.098966149  | -1.683568120 | -0.724866054 |
| H | 3.180004231  | 2.283709165  | 0.464649031  |
| O | 4.106230293  | 0.020160002  | -0.109638006 |
| C | 4.594245331  | -1.249680088 | -0.443284034 |
| H | 5.667841409  | -1.185754085 | -0.356263027 |
| H | 4.333994314  | -1.519934111 | -1.460828108 |
| H | 4.225790304  | -2.007609147 | 0.239178020  |
| H | -0.242120018 | -1.077552075 | -0.678596049 |
| O | 0.676685047  | 3.143278224  | 0.571431042  |
| H | -0.393381027 | 3.075665221  | 0.455732035  |
| C | 3.349699241  | 5.417357390  | 1.619863117  |
| O | 2.140813152  | 5.706299408  | 0.993561073  |
| H | 1.678255122  | 4.895085354  | 0.810982057  |
| H | 3.216652233  | 4.807940344  | 2.511958183  |
| H | 3.801504273  | 6.355511456  | 1.916698136  |
| H | 4.046954292  | 4.904461354  | 0.957928070  |
| C | -4.299183310 | 5.645275407  | -0.315960025 |
| O | -4.288534311 | 4.245349304  | -0.311772021 |
| H | -3.493716253 | 3.933341281  | 0.098414009  |
| H | -5.250623376 | 5.957977431  | -0.722574049 |
| H | -3.506048253 | 6.058024438  | -0.934648066 |
| H | -4.205424304 | 6.055504438  | 0.685919047  |

1.1 angstrom

|   |              |              |              |
|---|--------------|--------------|--------------|
| C | -2.608264187 | -0.689907049 | 0.409843027  |
| C | -3.753989268 | -1.439435101 | 0.170440012  |
| C | -4.740870340 | -0.952088070 | -0.680900050 |
| C | -4.597308331 | 0.283330019  | -1.274137094 |
| C | -3.465772249 | 1.053349074  | -1.030290075 |
| C | -2.455200176 | 0.558989042  | -0.202975015 |
| C | 0.090787009  | 0.957648067  | -0.026360002 |
| C | 0.493807036  | -0.346482026 | -0.403005031 |
| C | 1.090589076  | 1.945658139  | 0.262586017  |
| C | 1.811236132  | -0.685636049 | -0.451176030 |
| C | 2.441156177  | 1.573025115  | 0.212577015  |

|   |              |              |              |
|---|--------------|--------------|--------------|
| C | 2.793993199  | 0.277795021  | -0.132953011 |
| H | -1.858108134 | -1.058618076 | 1.084405079  |
| H | -3.878432278 | -2.394031170 | 0.647376047  |
| H | -5.622382406 | -1.538212110 | -0.864194063 |
| H | -5.362386384 | 0.664040050  | -1.924648141 |
| H | -3.376786242 | 2.026483148  | -1.472211107 |
| C | -1.255974091 | 1.406083102  | 0.041359002  |
| O | -1.462086105 | 2.612659190  | 0.308560021  |
| H | 2.090460148  | -1.677478121 | -0.745784055 |
| H | 3.205443232  | 2.292690166  | 0.430886031  |
| O | 4.106858294  | 0.018549001  | -0.149884011 |
| C | 4.585208328  | -1.259019093 | -0.472947033 |
| H | 5.659326407  | -1.199131088 | -0.390932026 |
| H | 4.320325311  | -1.538066110 | -1.486649105 |
| H | 4.216539302  | -2.007559145 | 0.219288015  |
| H | -0.241616019 | -1.076624078 | -0.675930049 |
| O | 0.702395050  | 3.147843225  | 0.555255040  |
| H | -0.469352036 | 3.060000220  | 0.464658033  |
| C | 3.324132238  | 5.428214393  | 1.592881115  |
| O | 2.076138151  | 5.700285409  | 1.042431073  |
| H | 1.638823120  | 4.879528353  | 0.836990061  |
| H | 3.260152232  | 4.764443345  | 2.453834179  |
| H | 3.754300270  | 6.365775458  | 1.922579137  |
| H | 4.008003290  | 4.981929357  | 0.870749061  |
| C | -4.273287307 | 5.675099408  | -0.387662028 |
| O | -4.208112302 | 4.276566306  | -0.363946024 |
| H | -3.426798244 | 4.000164286  | 0.095083007  |
| H | -5.200356374 | 5.944825429  | -0.873517065 |
| H | -3.449880247 | 6.112734439  | -0.946506071 |
| H | -4.277069310 | 6.098718438  | 0.613124044  |

1.0 angstrom

|   |              |              |              |
|---|--------------|--------------|--------------|
| C | -2.606720186 | -0.692861049 | 0.434950032  |
| C | -3.730512266 | -1.477287108 | 0.190384014  |
| C | -4.718702338 | -1.028313074 | -0.679600047 |
| C | -4.589352331 | 0.204864013  | -1.293868092 |
| C | -3.479792250 | 0.993171069  | -1.054313076 |
| C | -2.464652176 | 0.544802038  | -0.200539016 |
| C | 0.029878004  | 1.055384078  | -0.024110003 |
| C | 0.435770030  | -0.273240022 | -0.428969033 |
| C | 1.095451077  | 2.034102147  | 0.271680018  |
| C | 1.711300125  | -0.643688046 | -0.487821036 |
| C | 2.470807180  | 1.576551113  | 0.215186018  |
| C | 2.773171201  | 0.301555021  | -0.142105010 |
| H | -1.861090132 | -1.030199072 | 1.131436083  |
| H | -3.839935278 | -2.425583173 | 0.683606051  |
| H | -5.586712404 | -1.634266115 | -0.861632062 |

|   |              |              |              |
|---|--------------|--------------|--------------|
| H | -5.354937383 | 0.560021038  | -1.958737141 |
| H | -3.402455244 | 1.956190142  | -1.520155111 |
| C | -1.295752096 | 1.427793101  | 0.039858001  |
| O | -1.664579118 | 2.674808195  | 0.311061023  |
| H | 1.962926140  | -1.633869116 | -0.811785057 |
| H | 3.247617235  | 2.277178166  | 0.452275031  |
| O | 4.073220296  | -0.041077003 | -0.175447013 |
| C | 4.478478320  | -1.342312095 | -0.505173039 |
| H | 5.554022400  | -1.343367094 | -0.418573028 |
| H | 4.206779305  | -1.601873117 | -1.522285108 |
| H | 4.069602295  | -2.076142152 | 0.180178011  |
| H | -0.321990021 | -0.972507068 | -0.718621053 |
| O | 0.846011062  | 3.206158230  | 0.560407041  |
| H | -0.848345062 | 3.234252234  | 0.455241032  |
| C | 3.424824244  | 5.592616403  | 1.639091116  |
| O | 2.147386153  | 5.879883421  | 1.161860086  |
| H | 1.727392124  | 5.070402364  | 0.900895066  |
| H | 3.408534247  | 4.852464350  | 2.436624176  |
| H | 3.840021275  | 6.508864467  | 2.037494146  |
| H | 4.087264295  | 5.233692376  | 0.852928059  |
| C | -4.228666303 | 5.607933401  | -0.391505030 |
| O | -4.347940315 | 4.215851302  | -0.418052032 |
| H | -3.604574262 | 3.818659273  | 0.016376004  |
| H | -5.096661367 | 6.016637432  | -0.890315062 |
| H | -3.339034240 | 5.954176430  | -0.913234067 |
| H | -4.206409304 | 5.996943429  | 0.623689047  |

LIIC path connecting Franck-Condon point and S2-PP-ENOL  
Coord\_1

|   |              |              |              |
|---|--------------|--------------|--------------|
| C | -2.637431189 | -0.695595048 | 0.436158033  |
| C | -3.736978267 | -1.523800110 | 0.243698019  |
| C | -4.750410342 | -1.147863083 | -0.635095044 |
| C | -4.675607339 | 0.053070006  | -1.303631095 |
| C | -3.587005259 | 0.897287067  | -1.110708078 |
| C | -2.550899183 | 0.522000039  | -0.253248017 |
| C | -0.005549000 | 1.052874074  | -0.040131003 |
| C | 0.369371027  | -0.227380018 | -0.454634034 |
| C | 1.038664077  | 1.944421139  | 0.317609020  |
| C | 1.693231124  | -0.646326048 | -0.487964036 |
| C | 2.357777168  | 1.530150110  | 0.286557021  |
| C | 2.689447195  | 0.231993015  | -0.111990009 |
| H | -1.867100136 | -0.984384070 | 1.127377082  |
| H | -3.807979275 | -2.453741176 | 0.776626055  |
| H | -5.595569402 | -1.795063131 | -0.779434055 |
| H | -5.461169393 | 0.349656026  | -1.973727140 |
| H | -3.548627256 | 1.843053131  | -1.616089115 |
| C | -1.427195105 | 1.488841106  | -0.036476003 |

|   |              |              |              |
|---|--------------|--------------|--------------|
| O | -1.709663126 | 2.665927193  | 0.120122008  |
| H | 1.916141140  | -1.642602117 | -0.814793060 |
| H | 3.137568227  | 2.211928161  | 0.564997040  |
| O | 4.000131287  | -0.051352006 | -0.099748006 |
| C | 4.445979322  | -1.319964093 | -0.493115037 |
| H | 5.520039399  | -1.300779094 | -0.392400028 |
| H | 4.186598299  | -1.527752112 | -1.525463108 |
| H | 4.041023289  | -2.096791151 | 0.146030013  |
| H | -0.383459028 | -0.916571064 | -0.778715057 |
| O | 0.819464060  | 3.219030233  | 0.705953052  |
| H | -0.100960008 | 3.438381246  | 0.605170044  |
| C | 3.567884255  | 5.470021396  | 1.689361124  |
| O | 2.387378174  | 5.792071415  | 1.022001074  |
| H | 1.924343139  | 4.991646359  | 0.810230059  |
| H | 3.390906242  | 4.822152346  | 2.545209183  |
| H | 4.005295289  | 6.392334462  | 2.047926146  |
| H | 4.290869311  | 4.984147356  | 1.035644073  |
| C | -4.311069308 | 5.532672400  | -0.254039016 |
| O | -4.462977321 | 4.143584296  | -0.278974022 |
| H | -3.659670265 | 3.729799269  | 0.007872999  |
| H | -5.254252378 | 5.967519428  | -0.556090040 |
| H | -3.540258255 | 5.873784420  | -0.941803066 |
| H | -4.071159293 | 5.899610424  | 0.741088051  |

Coord\_2

|   |              |              |              |
|---|--------------|--------------|--------------|
| C | -2.642037190 | -0.696405049 | 0.433993031  |
| C | -3.740956267 | -1.524929110 | 0.239285019  |
| C | -4.754547344 | -1.147315083 | -0.638434047 |
| C | -4.679952339 | 0.055460004  | -1.303756092 |
| C | -3.591635259 | 0.899591063  | -1.108611080 |
| C | -2.555389183 | 0.523086038  | -0.251834019 |
| C | -0.016450999 | 1.053092074  | -0.039620003 |
| C | 0.368100028  | -0.231650018 | -0.453528033 |
| C | 1.032212073  | 1.947847139  | 0.309953022  |
| C | 1.698780124  | -0.647399045 | -0.483354034 |
| C | 2.359805171  | 1.533939109  | 0.278141018  |
| C | 2.693423195  | 0.229839015  | -0.114801009 |
| H | -1.871884136 | -0.986540071 | 1.124961081  |
| H | -3.811520275 | -2.456149176 | 0.770139057  |
| H | -5.599505401 | -1.794399130 | -0.784400055 |
| H | -5.465505392 | 0.353453027  | -1.973278143 |
| H | -3.553659256 | 1.846678133  | -1.611522114 |
| C | -1.431183101 | 1.488179105  | -0.032420002 |
| O | -1.713495126 | 2.667918191  | 0.129493012  |
| H | 1.921330136  | -1.645565118 | -0.804879056 |
| H | 3.137403225  | 2.219902158  | 0.551429041  |
| O | 4.005295289  | -0.048546001 | -0.100282010 |

|   |              |              |              |
|---|--------------|--------------|--------------|
| C | 4.453666320  | -1.318061097 | -0.487834033 |
| H | 5.527729397  | -1.296495092 | -0.387887029 |
| H | 4.193664303  | -1.531007108 | -1.518986111 |
| H | 4.050175293  | -2.092427153 | 0.155235009  |
| H | -0.380559025 | -0.923379067 | -0.781073054 |
| O | 0.815693058  | 3.221940232  | 0.690464050  |
| H | -0.107770005 | 3.437662248  | 0.597928042  |
| C | 3.567807259  | 5.467010393  | 1.689573123  |
| O | 2.392066171  | 5.798235419  | 1.018159073  |
| H | 1.925126141  | 5.001540359  | 0.801525057  |
| H | 3.383179243  | 4.818668349  | 2.543446182  |
| H | 4.009712289  | 6.385742458  | 2.051667148  |
| H | 4.290252311  | 4.977894360  | 1.037652073  |
| C | -4.305737308 | 5.530018396  | -0.249903019 |
| O | -4.461376322 | 4.141513297  | -0.272445017 |
| H | -3.658615266 | 3.725729266  | 0.013578000  |
| H | -5.247367380 | 5.967081428  | -0.553798041 |
| H | -3.533232252 | 5.867951421  | -0.937417065 |
| H | -4.065925291 | 5.898306425  | 0.744804055  |

Coord\_3

|   |              |              |              |
|---|--------------|--------------|--------------|
| C | -2.646618192 | -0.697218051 | 0.431818033  |
| C | -3.744964271 | -1.525977109 | 0.234848016  |
| C | -4.758697343 | -1.146599080 | -0.641775044 |
| C | -4.684237336 | 0.058020004  | -1.303845094 |
| C | -3.596148257 | 0.901983065  | -1.106467082 |
| C | -2.559780185 | 0.524171036  | -0.250393016 |
| C | -0.027223000 | 1.053151077  | -0.039071003 |
| C | 0.366953026  | -0.236007015 | -0.452440034 |
| C | 1.025893072  | 1.951053138  | 0.302311019  |
| C | 1.704424123  | -0.648558049 | -0.478788034 |
| C | 2.361960171  | 1.537513109  | 0.269713018  |
| C | 2.697510195  | 0.227496014  | -0.117586011 |
| H | -1.876657135 | -0.988767071 | 1.122517081  |
| H | -3.815148272 | -2.458480175 | 0.763601056  |
| H | -5.603496403 | -1.793504127 | -0.789377057 |
| H | -5.469767396 | 0.357488024  | -1.972776145 |
| H | -3.558517256 | 1.850394132  | -1.606879118 |
| C | -1.435007105 | 1.487428107  | -0.028327001 |
| O | -1.717082122 | 2.669808195  | 0.138954008  |
| H | 1.926565138  | -1.648583117 | -0.795033057 |
| H | 3.137354228  | 2.227605158  | 0.537845040  |
| O | 4.010540288  | -0.045961002 | -0.100831005 |
| C | 4.461386323  | -1.316354093 | -0.482597036 |
| H | 5.535448400  | -1.292458094 | -0.383429029 |
| H | 4.200765300  | -1.534419110 | -1.512531106 |
| H | 4.059327292  | -2.088235148 | 0.164366010  |



|   |              |              |              |
|---|--------------|--------------|--------------|
| H | -0.377550028 | -0.930195066 | -0.783483055 |
| O | 0.811841060  | 3.224530232  | 0.674990050  |
| H | -0.114608007 | 3.436426249  | 0.590700042  |
| C | 3.567001259  | 5.464332391  | 1.689639122  |
| O | 2.396031175  | 5.804425417  | 1.014197075  |
| H | 1.925334139  | 5.011399360  | 0.792833056  |
| H | 3.374856243  | 4.815680345  | 2.541618181  |
| H | 4.013242288  | 6.379571458  | 2.055108150  |
| H | 4.288930310  | 4.971974359  | 1.039560075  |
| C | -4.300003307 | 5.527473397  | -0.245628018 |
| O | -4.459399321 | 4.139568296  | -0.265789021 |
| H | -3.657191266 | 3.721763268  | 0.019379000  |
| H | -5.240075376 | 5.966763429  | -0.551330037 |
| H | -3.525833253 | 5.862214420  | -0.932910068 |
| H | -4.060241292 | 5.897097424  | 0.748652052  |

Coord\_4

|   |              |              |              |
|---|--------------|--------------|--------------|
| C | -2.651178192 | -0.698036053 | 0.429631028  |
| C | -3.749007270 | -1.526945111 | 0.230382014  |
| C | -4.762864344 | -1.145714084 | -0.645122048 |
| C | -4.688464335 | 0.060754004  | -1.303903092 |
| C | -3.600544259 | 0.904463065  | -1.104277082 |
| C | -2.564073183 | 0.525253040  | -0.248927021 |
| C | -0.037863003 | 1.053049078  | -0.038484003 |
| C | 0.365928026  | -0.240458015 | -0.451369032 |
| C | 1.019710075  | 1.954033141  | 0.294687020  |
| C | 1.710162124  | -0.649809045 | -0.474265034 |
| C | 2.364246170  | 1.540865108  | 0.261276017  |
| C | 2.701711196  | 0.224959017  | -0.120344008 |
| H | -1.881424133 | -0.991070071 | 1.120044082  |
| H | -3.818870277 | -2.460735180 | 0.757006052  |
| H | -5.607549403 | -1.792376128 | -0.794372057 |
| H | -5.473956395 | 0.361767026  | -1.972224144 |
| H | -3.563198258 | 1.854204134  | -1.602161117 |
| C | -1.438668101 | 1.486583106  | -0.024198000 |
| O | -1.720420124 | 2.671596195  | 0.148509012  |
| H | 1.931847137  | -1.651665119 | -0.785258058 |
| H | 3.137425228  | 2.235030161  | 0.524248037  |
| O | 4.015870288  | -0.043602004 | -0.101395007 |
| C | 4.469143321  | -1.314851092 | -0.477404034 |
| H | 5.543200397  | -1.288675091 | -0.379027025 |
| H | 4.207899303  | -1.537996110 | -1.506102111 |
| H | 4.068481291  | -2.084226149 | 0.173422010  |
| H | -0.374433026 | -0.937022066 | -0.785943057 |
| O | 0.807911057  | 3.226795232  | 0.659540048  |
| H | -0.121473008 | 3.434663247  | 0.583497040  |
| C | 3.565465258  | 5.462007393  | 1.689557121  |

|   |              |             |              |
|---|--------------|-------------|--------------|
| O | 2.399257171  | 5.810655416 | 1.010115070  |
| H | 1.924953137  | 5.021229362 | 0.784158057  |
| H | 3.365942242  | 4.813205346 | 2.539725182  |
| H | 4.015881290  | 6.373851459 | 2.058241149  |
| H | 4.286898306  | 4.966412356 | 1.041361077  |
| C | -4.293862311 | 5.525039399 | -0.241209018 |
| O | -4.457040323 | 4.137751297 | -0.259004021 |
| H | -3.655395265 | 3.717900268 | 0.025277003  |
| H | -5.232370375 | 5.966568427 | -0.548683040 |
| H | -3.518054252 | 5.856575423 | -0.928277068 |
| H | -4.054102291 | 5.895982427 | 0.752635053  |

Coord\_5

|   |              |              |              |
|---|--------------|--------------|--------------|
| C | -2.655719189 | -0.698861051 | 0.427429032  |
| C | -3.753089269 | -1.527832108 | 0.225883018  |
| C | -4.767050342 | -1.144658084 | -0.648481048 |
| C | -4.692630336 | 0.063664002  | -1.303932096 |
| C | -3.604821260 | 0.907034068  | -1.102043081 |
| C | -2.568269183 | 0.526331037  | -0.247435016 |
| C | -0.048371002 | 1.052782076  | -0.037854001 |
| C | 0.365027027  | -0.245007018 | -0.450313032 |
| C | 1.013663072  | 1.956784138  | 0.287084018  |
| C | 1.715995123  | -0.651158045 | -0.469786035 |
| C | 2.366664171  | 1.543991112  | 0.252833021  |
| C | 2.706026197  | 0.222220016  | -0.123075007 |
| H | -1.886188136 | -0.993453073 | 1.117541079  |
| H | -3.822691276 | -2.462915178 | 0.750348055  |
| H | -5.611666402 | -1.791010131 | -0.799391059 |
| H | -5.478069393 | 0.366295026  | -1.971627142 |
| H | -3.567699254 | 1.858108134  | -1.597367115 |
| C | -1.442163105 | 1.485641107  | -0.020030999 |
| O | -1.723505122 | 2.673276195  | 0.158161009  |
| H | 1.937174142  | -1.654815121 | -0.775555053 |
| H | 3.137618224  | 2.242171159  | 0.510641038  |
| O | 4.021284290  | -0.041477003 | -0.101974006 |
| C | 4.476934323  | -1.313560095 | -0.472257034 |
| H | 5.550983398  | -1.285156094 | -0.374682025 |
| H | 4.215067305  | -1.541742108 | -1.499701109 |
| H | 4.077636296  | -2.080408151 | 0.182399016  |
| H | -0.371208029 | -0.943867069 | -0.788453056 |
| O | 0.803902057  | 3.228730232  | 0.644120046  |
| H | -0.128366007 | 3.432361247  | 0.576331043  |
| C | 3.563191257  | 5.460055396  | 1.689320123  |
| O | 2.401726175  | 5.816938417  | 1.005911075  |
| H | 1.923963136  | 5.031036361  | 0.775504057  |
| H | 3.356443240  | 4.811262344  | 2.537767184  |
| H | 4.017624288  | 6.368607456  | 2.061056150  |

|   |              |             |              |
|---|--------------|-------------|--------------|
| H | 4.284150310  | 4.961231357 | 1.043049073  |
| C | -4.287304307 | 5.522715395 | -0.236643017 |
| O | -4.454295322 | 4.136063296 | -0.252086018 |
| H | -3.653221262 | 3.714139268 | 0.031277000  |
| H | -5.224242377 | 5.966499428 | -0.545852037 |
| H | -3.509883253 | 5.851035424 | -0.923513065 |
| H | -4.047500292 | 5.894959427 | 0.756760053  |

Coord\_6

|   |              |              |              |
|---|--------------|--------------|--------------|
| C | -2.660245189 | -0.699695050 | 0.425210033  |
| C | -3.757214270 | -1.528639108 | 0.221346017  |
| C | -4.771256343 | -1.143427080 | -0.651856046 |
| C | -4.696737338 | 0.066755006  | -1.303937092 |
| C | -3.608977260 | 0.909696067  | -1.099764078 |
| C | -2.572365184 | 0.527403039  | -0.245918018 |
| C | -0.058746004 | 1.052346077  | -0.037179004 |
| C | 0.364249026  | -0.249658015 | -0.449272035 |
| C | 1.007757072  | 1.959299143  | 0.279507020  |
| C | 1.721923125  | -0.652613049 | -0.465350032 |
| C | 2.369215170  | 1.546883113  | 0.244387018  |
| C | 2.710455193  | 0.219276018  | -0.125777008 |
| H | -1.890954134 | -0.995919070 | 1.115003081  |
| H | -3.826619274 | -2.465021177 | 0.743621053  |
| H | -5.615849406 | -1.789400130 | -0.804440056 |
| H | -5.482102396 | 0.371076026  | -1.970988139 |
| H | -3.572013255 | 1.862109132  | -1.592499113 |
| C | -1.445492107 | 1.484597109  | -0.015825003 |
| O | -1.726333124 | 2.674844195  | 0.167911010  |
| H | 1.942546137  | -1.658042118 | -0.765925054 |
| H | 3.137936228  | 2.249020163  | 0.497031038  |
| O | 4.026785288  | -0.039593005 | -0.102568008 |
| C | 4.484761321  | -1.312488094 | -0.467157035 |
| H | 5.558800399  | -1.281908094 | -0.370395028 |
| H | 4.222268301  | -1.545665111 | -1.493329105 |
| H | 4.086793295  | -2.076789150 | 0.191296014  |
| H | -0.367876028 | -0.950733070 | -0.791013056 |
| O | 0.799814057  | 3.230330231  | 0.628737043  |
| H | -0.135284010 | 3.429509246  | 0.569213043  |
| C | 3.560174258  | 5.458499392  | 1.688923124  |
| O | 2.403420172  | 5.823285422  | 1.001583072  |
| H | 1.922349141  | 5.040826362  | 0.766874054  |
| H | 3.346363239  | 4.809868349  | 2.535744181  |
| H | 4.018464288  | 6.363868456  | 2.063542150  |
| H | 4.280678309  | 4.956453357  | 1.044616078  |
| C | -4.280322305 | 5.520500397  | -0.231923016 |
| O | -4.451156322 | 4.134505297  | -0.245034017 |
| H | -3.650665261 | 3.710479267  | 0.037382002  |

|   |              |             |              |
|---|--------------|-------------|--------------|
| H | -5.215681374 | 5.966557431 | -0.542834038 |
| H | -3.501313254 | 5.845592423 | -0.918611069 |
| H | -4.040428293 | 5.894026424 | 0.761032054  |

Coord\_7

|   |              |              |              |
|---|--------------|--------------|--------------|
| C | -2.664758193 | -0.700540051 | 0.422970031  |
| C | -3.761386271 | -1.529365108 | 0.216765014  |
| C | -4.775484342 | -1.142018083 | -0.655254046 |
| C | -4.700780337 | 0.070029005  | -1.303921095 |
| C | -3.613009262 | 0.912451065  | -1.097444081 |
| C | -2.576363187 | 0.528467040  | -0.244378017 |
| C | -0.068985007 | 1.051736078  | -0.036457005 |
| C | 0.363593026  | -0.254417018 | -0.448245034 |
| C | 1.001992073  | 1.961573139  | 0.271961021  |
| C | 1.727944125  | -0.654179049 | -0.460959031 |
| C | 2.371901168  | 1.549535111  | 0.235941016  |
| C | 2.714999196  | 0.216118015  | -0.128450009 |
| H | -1.895726138 | -0.998475071 | 1.112428078  |
| H | -3.830658277 | -2.467052180 | 0.736818051  |
| H | -5.620102403 | -1.787543131 | -0.809528058 |
| H | -5.486055393 | 0.376119027  | -1.970311142 |
| H | -3.576137255 | 1.866208134  | -1.587554115 |
| C | -1.448653104 | 1.483448107  | -0.011579001 |
| O | -1.728899126 | 2.676296194  | 0.177763015  |
| H | 1.947962140  | -1.661353122 | -0.756370055 |
| H | 3.138381223  | 2.255571160  | 0.483420033  |
| O | 4.032372289  | -0.037959001 | -0.103176006 |
| C | 4.492623323  | -1.311643093 | -0.462106033 |
| H | 5.566649400  | -1.278941092 | -0.366168029 |
| H | 4.229501302  | -1.549772114 | -1.486989107 |
| H | 4.095953295  | -2.073380148 | 0.200111012  |
| H | -0.364440027 | -0.957625069 | -0.793620059 |
| O | 0.795649057  | 3.231588234  | 0.613399047  |
| H | -0.142227012 | 3.426096248  | 0.562155041  |
| C | 3.556406257  | 5.457357391  | 1.688362122  |
| O | 2.404320175  | 5.829709422  | 0.997128071  |
| H | 1.920090136  | 5.050601361  | 0.758271056  |
| H | 3.335703239  | 4.809043345  | 2.533655180  |
| H | 4.018395289  | 6.359663455  | 2.065689149  |
| H | 4.276477309  | 4.952102356  | 1.046054074  |
| C | -4.272906310 | 5.518396399  | -0.227045017 |
| O | -4.447617322 | 4.133076296  | -0.237843017 |
| H | -3.647720263 | 3.706918269  | 0.043596003  |
| H | -5.206677375 | 5.966745432  | -0.539624039 |
| H | -3.492330253 | 5.840245420  | -0.913563067 |
| H | -4.032877288 | 5.893182423  | 0.765459055  |

## Coord\_8

|   |              |              |              |
|---|--------------|--------------|--------------|
| C | -2.669260195 | -0.701398048 | 0.420707031  |
| C | -3.765609270 | -1.530010111 | 0.212135015  |
| C | -4.779737345 | -1.140427085 | -0.658679045 |
| C | -4.704761338 | 0.073491004  | -1.303888095 |
| C | -3.616914262 | 0.915300065  | -1.095082077 |
| C | -2.580260186 | 0.529522040  | -0.242816018 |
| C | -0.079088006 | 1.050948075  | -0.035684004 |
| C | 0.363060028  | -0.259289020 | -0.447232030 |
| C | 0.996372073  | 1.963601142  | 0.264449017  |
| C | 1.734061123  | -0.655865045 | -0.456611035 |
| C | 2.374725170  | 1.551940111  | 0.227499014  |
| C | 2.719658194  | 0.212740018  | -0.131092011 |
| H | -1.900508138 | -1.001122073 | 1.109814080  |
| H | -3.834817277 | -2.469008178 | 0.729931053  |
| H | -5.624428406 | -1.785432126 | -0.814662056 |
| H | -5.489923392 | 0.381427029  | -1.969599144 |
| H | -3.580065259 | 1.870408134  | -1.582534112 |
| C | -1.451644104 | 1.482188109  | -0.007291999 |
| O | -1.731199126 | 2.677626191  | 0.187722015  |
| H | 1.953422143  | -1.664755117 | -0.746892051 |
| H | 3.138957228  | 2.261816161  | 0.469813034  |
| O | 4.038046291  | -0.036582002 | -0.103796006 |
| C | 4.500521325  | -1.311035094 | -0.457105033 |
| H | 5.574532400  | -1.276264090 | -0.362002028 |
| H | 4.236765303  | -1.554070113 | -1.480683108 |
| H | 4.105113295  | -2.070191151 | 0.208843013  |
| H | -0.360897026 | -0.964548067 | -0.796275057 |
| O | 0.791405055  | 3.232499234  | 0.598113042  |
| H | -0.149191011 | 3.422108247  | 0.555168038  |
| C | 3.551879257  | 5.456655395  | 1.687630122  |
| O | 2.404405172  | 5.836222419  | 0.992544073  |
| H | 1.917166140  | 5.060366364  | 0.749696056  |
| H | 3.324466239  | 4.808806348  | 2.531502180  |
| H | 4.017405288  | 6.356023457  | 2.067483150  |
| H | 4.271538307  | 4.948204357  | 1.047356073  |
| C | -4.265045307 | 5.516401395  | -0.222002016 |
| O | -4.443670321 | 4.131777299  | -0.230510017 |
| H | -3.644382261 | 3.703456264  | 0.049923005  |
| H | -5.197217374 | 5.967065431  | -0.536216037 |
| H | -3.482924249 | 5.834994421  | -0.908362064 |
| H | -4.024839292 | 5.892423424  | 0.770048054  |

## Coord\_9

|   |              |              |              |
|---|--------------|--------------|--------------|
| C | -2.673755190 | -0.702270053 | 0.418417032  |
| C | -3.769886271 | -1.530572108 | 0.207450013  |
| C | -4.784016347 | -1.138651081 | -0.662139050 |

|   |              |              |              |
|---|--------------|--------------|--------------|
| C | -4.708676339 | 0.077146005  | -1.303840094 |
| C | -3.620690260 | 0.918244068  | -1.092680078 |
| C | -2.584056186 | 0.530567038  | -0.241232016 |
| C | -0.089054006 | 1.049978077  | -0.034858001 |
| C | 0.362650027  | -0.264279019 | -0.446230033 |
| C | 0.990900073  | 1.965378141  | 0.256976018  |
| C | 1.740272124  | -0.657676048 | -0.452308030 |
| C | 2.377689171  | 1.554090110  | 0.219065014  |
| C | 2.724434194  | 0.209135013  | -0.133703009 |
| H | -1.905305135 | -1.003867075 | 1.107157081  |
| H | -3.839100274 | -2.470890176 | 0.722954052  |
| H | -5.628829404 | -1.783062127 | -0.819849057 |
| H | -5.493703395 | 0.387010029  | -1.968855142 |
| H | -3.583791259 | 1.874710133  | -1.577436114 |
| C | -1.454464106 | 1.480815106  | -0.002961001 |
| O | -1.733228124 | 2.678829190  | 0.197789014  |
| H | 1.958925142  | -1.668255122 | -0.737491053 |
| H | 3.139667225  | 2.267747163  | 0.456217031  |
| O | 4.043810291  | -0.035471005 | -0.104428008 |
| C | 4.508455322  | -1.310673095 | -0.452154035 |
| H | 5.582449399  | -1.273888090 | -0.357897025 |
| H | 4.244059307  | -1.558566114 | -1.474411109 |
| H | 4.114276296  | -2.067232151 | 0.217488018  |
| H | -0.357251027 | -0.971508071 | -0.798978058 |
| O | 0.787084058  | 3.233056235  | 0.582887041  |
| H | -0.156175013 | 3.417533245  | 0.548262037  |
| C | 3.546584256  | 5.456413391  | 1.686721122  |
| O | 2.403653174  | 5.842835420  | 0.987825072  |
| H | 1.913558136  | 5.070126366  | 0.741152055  |
| H | 3.312653241  | 4.809178344  | 2.529282181  |
| H | 4.015485290  | 6.352978460  | 2.068911151  |
| H | 4.265852308  | 4.944785353  | 1.048514077  |
| C | -4.256730308 | 5.514516397  | -0.216788017 |
| O | -4.439307318 | 4.130608298  | -0.223030017 |
| H | -3.640644264 | 3.700089268  | 0.056367003  |
| H | -5.187290374 | 5.967518428  | -0.532605037 |
| H | -3.473083251 | 5.829839419  | -0.903000065 |
| H | -4.016303287 | 5.891747426  | 0.774806056  |

Coord\_10

|   |              |              |              |
|---|--------------|--------------|--------------|
| C | -2.667068194 | -0.714328050 | 0.410641032  |
| C | -3.757864269 | -1.547831113 | 0.192596012  |
| C | -4.769697345 | -1.159181084 | -0.680955047 |
| C | -4.696870337 | 0.058379003  | -1.319676093 |
| C | -3.613924257 | 0.904241065  | -1.101527080 |
| C | -2.579547188 | 0.520368035  | -0.245603020 |
| C | -0.094308006 | 1.050139074  | -0.028311004 |

|   |              |              |              |
|---|--------------|--------------|--------------|
| C | 0.375477029  | -0.266072019 | -0.436306033 |
| C | 0.984178072  | 1.973821143  | 0.259740017  |
| C | 1.761616129  | -0.649401049 | -0.432109033 |
| C | 2.381596172  | 1.569829112  | 0.227910016  |
| C | 2.738523199  | 0.220639015  | -0.116264009 |
| H | -1.900786136 | -1.013529073 | 1.102945079  |
| H | -3.824953276 | -2.489420180 | 0.706164051  |
| H | -5.610683403 | -1.807244130 | -0.843998061 |
| H | -5.480053395 | 0.365837028  | -1.988014142 |
| H | -3.579336259 | 1.861877135  | -1.584113114 |
| C | -1.454820104 | 1.473895108  | 0.000166998  |
| O | -1.739661125 | 2.673231194  | 0.204435015  |
| H | 1.985899142  | -1.660755120 | -0.710380049 |
| H | 3.136601225  | 2.291159166  | 0.463017033  |
| O | 4.059871292  | -0.012688004 | -0.078477007 |
| C | 4.534631328  | -1.286536093 | -0.417397033 |
| H | 5.607935401  | -1.242371092 | -0.318830023 |
| H | 4.275798306  | -1.541329112 | -1.439392106 |
| H | 4.142147299  | -2.041921148 | 0.254583020  |
| H | -0.335112024 | -0.979014069 | -0.795700059 |
| O | 0.773445054  | 3.239391233  | 0.575941039  |
| H | -0.173157014 | 3.413760243  | 0.544947038  |
| C | 3.514717255  | 5.477356396  | 1.705438121  |
| O | 2.377722171  | 5.864048421  | 0.996966074  |
| H | 1.889982136  | 5.091735367  | 0.744862053  |
| H | 3.273620238  | 4.830331347  | 2.546140181  |
| H | 3.980506288  | 6.373894460  | 2.091349150  |
| H | 4.239245302  | 4.965677356  | 1.073222077  |
| C | -4.264641307 | 5.493194396  | -0.229305017 |
| O | -4.444301322 | 4.109109298  | -0.233131016 |
| H | -3.645494263 | 3.680550266  | 0.049402004  |
| H | -5.194283372 | 5.943687428  | -0.551544042 |
| H | -3.477735248 | 5.808620417  | -0.911813067 |
| H | -4.030641292 | 5.873551423  | 0.762688056  |

LIIC path connecting S2-PP-ENOL and S1-NP-ENOL

Coord\_1

|   |              |              |              |
|---|--------------|--------------|--------------|
| C | -2.667068194 | -0.714328050 | 0.410641032  |
| C | -3.757864269 | -1.547831113 | 0.192596012  |
| C | -4.769697345 | -1.159181084 | -0.680955047 |
| C | -4.696870337 | 0.058379003  | -1.319676093 |
| C | -3.613924257 | 0.904241065  | -1.101527080 |
| C | -2.579547188 | 0.520368035  | -0.245603020 |
| C | -0.094308006 | 1.050139074  | -0.028311004 |
| C | 0.375477029  | -0.266072019 | -0.436306033 |
| C | 0.984178072  | 1.973821143  | 0.259740017  |
| C | 1.761616129  | -0.649401049 | -0.432109033 |

|   |              |              |              |
|---|--------------|--------------|--------------|
| C | 2.381596172  | 1.569829112  | 0.227910016  |
| C | 2.738523199  | 0.220639015  | -0.116264009 |
| H | -1.900786136 | -1.013529073 | 1.102945079  |
| H | -3.824953276 | -2.489420180 | 0.706164051  |
| H | -5.610683403 | -1.807244130 | -0.843998061 |
| H | -5.480053395 | 0.365837028  | -1.988014142 |
| H | -3.579336259 | 1.861877135  | -1.584113114 |
| C | -1.454820104 | 1.473895108  | 0.000166998  |
| O | -1.739661125 | 2.673231194  | 0.204435015  |
| H | 1.985899142  | -1.660755120 | -0.710380049 |
| H | 3.136601225  | 2.291159166  | 0.463017033  |
| O | 4.059871292  | -0.012688004 | -0.078477007 |
| C | 4.534631328  | -1.286536093 | -0.417397033 |
| H | 5.607935401  | -1.242371092 | -0.318830023 |
| H | 4.275798306  | -1.541329112 | -1.439392106 |
| H | 4.142147299  | -2.041921148 | 0.254583020  |
| H | -0.335112024 | -0.979014069 | -0.795700059 |
| O | 0.773445054  | 3.239391233  | 0.575941039  |
| H | -0.173157014 | 3.413760243  | 0.544947038  |
| C | 3.514717255  | 5.477356396  | 1.705438121  |
| O | 2.377722171  | 5.864048421  | 0.996966074  |
| H | 1.889982136  | 5.091735367  | 0.744862053  |
| H | 3.273620238  | 4.830331347  | 2.546140181  |
| H | 3.980506288  | 6.373894460  | 2.091349150  |
| H | 4.239245302  | 4.965677356  | 1.073222077  |
| C | -4.264641307 | 5.493194396  | -0.229305017 |
| O | -4.444301322 | 4.109109298  | -0.233131016 |
| H | -3.645494263 | 3.680550266  | 0.049402004  |
| H | -5.194283372 | 5.943687428  | -0.551544042 |
| H | -3.477735248 | 5.808620417  | -0.911813067 |
| H | -4.030641292 | 5.873551423  | 0.762688056  |

Coord\_2

|   |              |              |              |
|---|--------------|--------------|--------------|
| C | -2.653220192 | -0.736787052 | 0.394519028  |
| C | -3.750213271 | -1.564467112 | 0.183846014  |
| C | -4.779252344 | -1.159140083 | -0.660840046 |
| C | -4.716503342 | 0.072641008  | -1.279100094 |
| C | -3.629919259 | 0.910820066  | -1.069159075 |
| C | -2.575382187 | 0.509562035  | -0.241843020 |
| C | -0.078955008 | 1.035877075  | -0.035784003 |
| C | 0.390301030  | -0.272222022 | -0.449394031 |
| C | 0.989946072  | 1.958355138  | 0.274370021  |
| C | 1.772277129  | -0.651568046 | -0.444595034 |
| C | 2.380721172  | 1.562305111  | 0.245109017  |
| C | 2.744728199  | 0.222886018  | -0.113895010 |
| H | -1.874263137 | -1.049431077 | 1.066086079  |
| H | -3.808019276 | -2.515003180 | 0.681853051  |



|   |              |              |              |
|---|--------------|--------------|--------------|
| H | -5.624758406 | -1.802464130 | -0.818962061 |
| H | -5.512587398 | 0.392771028  | -1.925855141 |
| H | -3.603627262 | 1.875966136  | -1.537205112 |
| C | -1.445355103 | 1.451987106  | -0.013811002 |
| O | -1.730990122 | 2.671579192  | 0.157868009  |
| H | 2.003319144  | -1.658307119 | -0.733721052 |
| H | 3.133016223  | 2.281595166  | 0.495807035  |
| O | 4.066742293  | -0.007857002 | -0.075064004 |
| C | 4.546616325  | -1.276924091 | -0.423883031 |
| H | 5.619394406  | -1.230456089 | -0.320189024 |
| H | 4.293482309  | -1.523190112 | -1.449413104 |
| H | 4.153903300  | -2.040088147 | 0.239153016  |
| H | -0.319168024 | -0.983766070 | -0.814495059 |
| O | 0.772900055  | 3.223296233  | 0.608782044  |
| H | -0.173602010 | 3.391116246  | 0.613930044  |
| C | 3.519704254  | 5.464311394  | 1.709929122  |
| O | 2.368629170  | 5.846111419  | 1.021763071  |
| H | 1.885514134  | 5.071105365  | 0.768595055  |
| H | 3.297068235  | 4.809551345  | 2.549748185  |
| H | 3.983904289  | 6.362178460  | 2.094811149  |
| H | 4.238495305  | 4.962949357  | 1.063185077  |
| C | -4.291214308 | 5.523832399  | -0.278447020 |
| O | -4.448730319 | 4.138271298  | -0.218289018 |
| H | -3.645303262 | 3.733370268  | 0.085955007  |
| H | -5.228183377 | 5.943479429  | -0.620135044 |
| H | -3.509750255 | 5.819549420  | -0.975669071 |
| H | -4.063102294 | 5.952927429  | 0.694744052  |

Coord\_3

|   |              |              |              |
|---|--------------|--------------|--------------|
| C | -2.639286188 | -0.756785057 | 0.378455027  |
| C | -3.742828269 | -1.578077112 | 0.175407012  |
| C | -4.787716343 | -1.156364083 | -0.640588047 |
| C | -4.733404342 | 0.088845008  | -1.238710090 |
| C | -3.642911264 | 0.918880065  | -1.037203077 |
| C | -2.569508182 | 0.500503034  | -0.238524015 |
| C | -0.061987003 | 1.021248076  | -0.043039002 |
| C | 0.405605027  | -0.279036021 | -0.462497031 |
| C | 0.997990074  | 1.941253140  | 0.289188022  |
| C | 1.783088130  | -0.655590047 | -0.457196035 |
| C | 2.381746172  | 1.551914112  | 0.262409017  |
| C | 2.751715197  | 0.222218016  | -0.111435008 |
| H | -1.848658134 | -1.082674077 | 1.029420076  |
| H | -3.792637273 | -2.536933184 | 0.658119049  |
| H | -5.638039406 | -1.794494128 | -0.793595055 |
| H | -5.541384398 | 0.421436031  | -1.864028135 |
| H | -3.623747258 | 1.891001135  | -1.491066105 |
| C | -1.433870104 | 1.430712101  | -0.027753002 |

|   |              |              |              |
|---|--------------|--------------|--------------|
| O | -1.718585123 | 2.670148191  | 0.109471009  |
| H | 2.020053147  | -1.657699121 | -0.757275054 |
| H | 3.131854224  | 2.268256163  | 0.528713039  |
| O | 4.074200295  | -0.007043000 | -0.071632004 |
| C | 4.558142330  | -1.271565092 | -0.430515030 |
| H | 5.630409406  | -1.223761087 | -0.321710022 |
| H | 4.310456309  | -1.508870110 | -1.459505106 |
| H | 4.164643301  | -2.042202146 | 0.223387016  |
| H | -0.303368019 | -0.988439071 | -0.833444060 |
| O | 0.774667057  | 3.205203229  | 0.641862046  |
| H | -0.170435011 | 3.365850244  | 0.682771051  |
| C | 3.523485251  | 5.453865392  | 1.714822122  |
| O | 2.358117170  | 5.828363417  | 1.046929074  |
| H | 1.880912133  | 5.049888364  | 0.792784059  |
| H | 3.320394241  | 4.791458346  | 2.553611184  |
| H | 3.984537285  | 6.353946457  | 2.098466150  |
| H | 4.237105304  | 4.963850355  | 1.053925078  |
| C | -4.326623309 | 5.553084401  | -0.326016022 |
| O | -4.445176322 | 4.167603302  | -0.203513013 |
| H | -3.630562262 | 3.796827272  | 0.114544009  |
| H | -5.277504379 | 5.930730427  | -0.677760050 |
| H | -3.558915256 | 5.838510423  | -1.042348077 |
| H | -4.103408297 | 6.030658433  | 0.625374047  |

Coord\_4

|   |              |              |              |
|---|--------------|--------------|--------------|
| C | -2.625435190 | -0.774559057 | 0.362234024  |
| C | -3.735656271 | -1.589184114 | 0.167117012  |
| C | -4.794935348 | -1.151845084 | -0.620870045 |
| C | -4.747535343 | 0.105809007  | -1.199753088 |
| C | -3.653080262 | 0.927524065  | -1.006969075 |
| C | -2.562210182 | 0.492767034  | -0.236429018 |
| C | -0.043803001 | 1.006152073  | -0.050510005 |
| C | 0.421198028  | -0.286730020 | -0.475470034 |
| C | 1.007759073  | 1.922638140  | 0.303636021  |
| C | 1.793890130  | -0.661566046 | -0.469338034 |
| C | 2.384172170  | 1.538895108  | 0.279685020  |
| C | 2.759191201  | 0.218748016  | -0.108434006 |
| H | -1.824224131 | -1.113122078 | 0.993121072  |
| H | -3.778668274 | -2.555586185 | 0.635242044  |
| H | -5.650201407 | -1.784547130 | -0.768521055 |
| H | -5.566329401 | 0.450290034  | -1.804174129 |
| H | -3.639975262 | 1.905940137  | -1.447450105 |
| C | -1.420816100 | 1.409854104  | -0.042560001 |
| O | -1.702967123 | 2.668623192  | 0.057681003  |
| H | 2.036098145  | -1.659134117 | -0.780042058 |
| H | 3.132495227  | 2.251544163  | 0.561498041  |
| O | 4.081967294  | -0.010014002 | -0.067368005 |

|   |              |              |              |
|---|--------------|--------------|--------------|
| C | 4.569117328  | -1.270334093 | -0.435906033 |
| H | 5.640865408  | -1.222037086 | -0.321798025 |
| H | 4.326887310  | -1.498660106 | -1.468244104 |
| H | 4.174182298  | -2.047923145 | 0.208876013  |
| H | -0.287768022 | -0.993442071 | -0.852286061 |
| O | 0.778057056  | 3.185370232  | 0.674094047  |
| H | -0.164390013 | 3.338244242  | 0.750056055  |
| C | 3.525122256  | 5.446521391  | 1.719057122  |
| O | 2.345476168  | 5.811086420  | 1.070960077  |
| H | 1.875520134  | 5.028326364  | 0.816055057  |
| H | 3.342436241  | 4.776930346  | 2.556850183  |
| H | 3.981381288  | 6.349790458  | 2.101083149  |
| H | 4.234253304  | 4.968595355  | 1.044725078  |
| C | -4.368434313 | 5.582071403  | -0.368723029 |
| O | -4.433307321 | 4.198993303  | -0.189474015 |
| H | -3.601856259 | 3.870090280  | 0.131059011  |
| H | -5.338655382 | 5.909761424  | -0.717370052 |
| H | -3.624251263 | 5.865902420  | -1.109897082 |
| H | -4.147003300 | 6.104943441  | 0.558859039  |

Coord\_5

|   |              |              |              |
|---|--------------|--------------|--------------|
| C | -2.611816189 | -0.790674055 | 0.345734024  |
| C | -3.728584267 | -1.598710114 | 0.158908012  |
| C | -4.800811348 | -1.146991084 | -0.602229041 |
| C | -4.759064343 | 0.121996010  | -1.163309085 |
| C | -3.660855263 | 0.935564066  | -0.979594069 |
| C | -2.553909185 | 0.485654034  | -0.236208018 |
| C | -0.024967001 | 0.990384072  | -0.058558003 |
| C | 0.436810032  | -0.295575022 | -0.488182036 |
| C | 1.018466075  | 1.902630139  | 0.317217022  |
| C | 1.804478131  | -0.669537048 | -0.480542034 |
| C | 2.387286171  | 1.523594112  | 0.296784022  |
| C | 2.766745201  | 0.212724015  | -0.104551010 |
| H | -1.801113130 | -1.140951081 | 0.957434068  |
| H | -3.765792270 | -2.571776183 | 0.613562044  |
| H | -5.660944409 | -1.774302126 | -0.744239053 |
| H | -5.587603401 | 0.477418036  | -1.747737127 |
| H | -3.652951265 | 1.919483138  | -1.407901101 |
| C | -1.406824104 | 1.388976098  | -0.058978006 |
| O | -1.684892122 | 2.666362192  | 0.001145002  |
| H | 2.051472146  | -1.662742122 | -0.801176059 |
| H | 3.134051225  | 2.232036161  | 0.593898045  |
| O | 4.089659293  | -0.016299003 | -0.061633004 |
| C | 4.579435332  | -1.272819094 | -0.438922032 |
| H | 5.650626405  | -1.224657090 | -0.319156022 |
| H | 4.342897314  | -1.492543108 | -1.474465106 |
| H | 4.182421302  | -2.056695147 | 0.196951014  |

|   |              |              |              |
|---|--------------|--------------|--------------|
| H | -0.272451018 | -0.999283071 | -0.870778065 |
| O | 0.782039057  | 3.164039229  | 0.704509049  |
| H | -0.156583014 | 3.308535236  | 0.814555057  |
| C | 3.523184255  | 5.442920393  | 1.721621124  |
| O | 2.329432170  | 5.794650418  | 1.092463078  |
| H | 1.868186135  | 5.006724360  | 0.837156058  |
| H | 3.361639242  | 4.766943342  | 2.558644184  |
| H | 3.972854284  | 6.350461454  | 2.101479153  |
| H | 4.228649306  | 4.977615356  | 1.034842073  |
| C | -4.412820319 | 5.612443404  | -0.403484031 |
| O | -4.412587317 | 4.234401304  | -0.177407011 |
| H | -3.560205258 | 3.951720284  | 0.131637011  |
| H | -5.406015392 | 5.886201421  | -0.733082054 |
| H | -3.703289266 | 5.901826422  | -1.175669083 |
| H | -4.187685303 | 6.174975446  | 0.499569036  |

Coord\_6

|   |              |              |              |
|---|--------------|--------------|--------------|
| C | -2.598550186 | -0.806033059 | 0.328952025  |
| C | -3.721428267 | -1.607988115 | 0.150824009  |
| C | -4.805304348 | -1.143625083 | -0.584997040 |
| C | -4.768392341 | 0.135509011  | -1.130153082 |
| C | -3.666934266 | 0.941520067  | -0.955908069 |
| C | -2.545163182 | 0.478193032  | -0.238295019 |
| C | -0.006195999 | 0.973656070  | -0.067440005 |
| C | 0.452095031  | -0.305859021 | -0.500536038 |
| C | 1.029100072  | 1.881344137  | 0.329543026  |
| C | 1.814591132  | -0.679449051 | -0.490489037 |
| C | 2.390177172  | 1.506468111  | 0.313534022  |
| C | 2.773850199  | 0.204560017  | -0.099600006 |
| H | -1.779341127 | -1.166676086 | 0.922647067  |
| H | -3.753490269 | -2.586774188 | 0.593460045  |
| H | -5.669991409 | -1.765917128 | -0.721039054 |
| H | -5.605718403 | 0.500540034  | -1.695786124 |
| H | -3.663715264 | 1.930081140  | -1.373586100 |
| C | -1.392702099 | 1.367426101  | -0.077525007 |
| O | -1.665373122 | 2.662402190  | -0.061147003 |
| H | 2.066205150  | -1.668515118 | -0.820080059 |
| H | 3.135386223  | 2.210478157  | 0.625637043  |
| O | 4.096799296  | -0.025150001 | -0.054050005 |
| C | 4.588974329  | -1.278272091 | -0.438820033 |
| H | 5.659540407  | -1.230574091 | -0.312948022 |
| H | 4.358540312  | -1.490104109 | -1.477403109 |
| H | 4.189366304  | -2.067715147 | 0.188522014  |
| H | -0.257546016 | -1.006527074 | -0.888725064 |
| O | 0.785268054  | 3.141407228  | 0.732356055  |
| H | -0.148468012 | 3.276871238  | 0.875349061  |
| C | 3.515775255  | 5.443799393  | 1.721640126  |

|   |              |             |              |
|---|--------------|-------------|--------------|
| O | 2.308175167  | 5.779464418 | 1.110312078  |
| H | 1.857279135  | 4.985411360 | 0.855092061  |
| H | 3.376104244  | 4.762500344 | 2.558299182  |
| H | 3.956847286  | 6.356804459 | 2.098628152  |
| H | 4.218533305  | 4.991538359 | 1.023572074  |
| C | -4.454590322 | 5.646405407 | -0.427705030 |
| O | -4.382447318 | 4.275592307 | -0.169037010 |
| H | -3.507095251 | 4.039608290 | 0.112929007  |
| H | -5.472123394 | 5.866753422 | -0.720685051 |
| H | -3.791832273 | 5.946491427 | -1.236341091 |
| H | -4.217639302 | 6.241078448 | 0.451305033  |

Coord\_7

|   |              |              |              |
|---|--------------|--------------|--------------|
| C | -2.585721184 | -0.821857057 | 0.312028021  |
| C | -3.713932270 | -1.618733117 | 0.143056010  |
| C | -4.808431347 | -1.143955083 | -0.569205042 |
| C | -4.776152344 | 0.144145009  | -1.100611079 |
| C | -3.672280263 | 0.943667066  | -0.936294066 |
| C | -2.536665183 | 0.469169036  | -0.242835016 |
| C | 0.011645000  | 0.955628070  | -0.077271007 |
| C | 0.466616036  | -0.317839022 | -0.512492036 |
| C | 1.038467075  | 1.858890136  | 0.340380025  |
| C | 1.823912134  | -0.691106048 | -0.499076038 |
| C | 2.391766170  | 1.488086107  | 0.329748024  |
| C | 2.779877200  | 0.194853012  | -0.093600009 |
| H | -1.758784125 | -1.191130086 | 0.889075062  |
| H | -3.741036268 | -2.602294190 | 0.575349043  |
| H | -5.677098407 | -1.761979128 | -0.698913048 |
| H | -5.621519402 | 0.517073039  | -1.648813118 |
| H | -3.673701262 | 1.935992140  | -1.345099097 |
| C | -1.379428100 | 1.344374097  | -0.098403007 |
| O | -1.645678119 | 2.655507190  | -0.129701010 |
| H | 2.080319149  | -1.676247122 | -0.836518061 |
| H | 3.135169223  | 2.187761160  | 0.656447050  |
| O | 4.102828297  | -0.035528003 | -0.044586004 |
| C | 4.597601331  | -1.285566095 | -0.435397034 |
| H | 5.667447410  | -1.238279091 | -0.302961024 |
| H | 4.373772314  | -1.490446105 | -1.476838106 |
| H | 4.195136304  | -2.079922149 | 0.183908012  |
| H | -0.243246017 | -1.015724074 | -0.906009067 |
| O | 0.786137058  | 3.117609223  | 0.757202054  |
| H | -0.141762008 | 3.243271235  | 0.931957067  |
| C | 3.500588249  | 5.449914391  | 1.718508122  |
| O | 2.279418162  | 5.765924418  | 1.123814078  |
| H | 1.840749130  | 4.964707358  | 0.869274064  |
| H | 3.383657244  | 4.764538343  | 2.555341181  |
| H | 3.930786281  | 6.369658460  | 2.091816149  |

|   |              |             |              |
|---|--------------|-------------|--------------|
| H | 4.201706305  | 5.011151361 | 1.010354073  |
| C | -4.487297323 | 5.686621407 | -0.439622033 |
| O | -4.342453313 | 4.323889310 | -0.166412010 |
| H | -3.444485248 | 4.130984295 | 0.072403005  |
| H | -5.527968400 | 5.858811424 | -0.678091050 |
| H | -3.883711281 | 6.000597430 | -1.288181093 |
| H | -4.227685304 | 6.304507453 | 0.416574030  |

Coord\_8

|   |              |              |              |
|---|--------------|--------------|--------------|
| C | -2.573365186 | -0.839600058 | 0.295261024  |
| C | -3.705768266 | -1.632951115 | 0.135959008  |
| C | -4.810270349 | -1.150451083 | -0.554507038 |
| C | -4.783198344 | 0.145512012  | -1.074417075 |
| C | -3.678107266 | 0.940139068  | -0.920547064 |
| C | -2.529226184 | 0.457213033  | -0.249602018 |
| C | 0.027568002  | 0.935970067  | -0.087999007 |
| C | 0.479849034  | -0.331662026 | -0.524090035 |
| C | 1.045237078  | 1.835392131  | 0.349699027  |
| C | 1.832061130  | -0.704114050 | -0.506491034 |
| C | 2.390863171  | 1.469116108  | 0.345233025  |
| C | 2.784114201  | 0.184407016  | -0.086823006 |
| H | -1.739169123 | -1.215408088 | 0.857028061  |
| H | -3.727509270 | -2.620399190 | 0.559640041  |
| H | -5.682059407 | -1.765388125 | -0.677467050 |
| H | -5.636173405 | 0.524260039  | -1.606559114 |
| H | -3.684710266 | 1.935383141  | -1.322281095 |
| C | -1.368122096 | 1.318890096  | -0.121433007 |
| O | -1.627314118 | 2.644281192  | -0.204376017 |
| H | 2.093799151  | -1.685456124 | -0.850726063 |
| H | 3.131946227  | 2.164883155  | 0.686087051  |
| O | 4.107125296  | -0.046098001 | -0.033644005 |
| C | 4.605157331  | -1.293179093 | -0.429130030 |
| H | 5.674176407  | -1.245813088 | -0.289777022 |
| H | 4.388418316  | -1.492122105 | -1.473241108 |
| H | 4.199961300  | -2.091988153 | 0.182663012  |
| H | -0.229830019 | -1.027307076 | -0.922624069 |
| O | 0.782861054  | 3.092695224  | 0.779041056  |
| H | -0.138334008 | 3.207595232  | 0.984458070  |
| C | 3.475008250  | 5.461949395  | 1.712041121  |
| O | 2.240514162  | 5.754339415  | 1.132903084  |
| H | 1.816225130  | 4.944874356  | 0.879678064  |
| H | 3.381956246  | 4.773818344  | 2.549627184  |
| H | 3.891748282  | 6.389741461  | 2.080826148  |
| H | 4.175591301  | 5.037332363  | 0.994893070  |
| C | -4.503445326 | 5.735960412  | -0.438665031 |
| O | -4.292459308 | 4.380018315  | -0.171626015 |
| H | -3.374802240 | 4.222513305  | 0.008671998  |

|   |              |             |              |
|---|--------------|-------------|--------------|
| H | -5.563357399 | 5.869904424 | -0.605727046 |
| H | -3.970614288 | 6.065556435 | -1.327581096 |
| H | -4.207778301 | 6.366916459 | 0.395932026  |

Coord\_9

|   |              |              |              |
|---|--------------|--------------|--------------|
| C | -2.561485183 | -0.860813060 | 0.279113021  |
| C | -3.696553263 | -1.652775121 | 0.130056009  |
| C | -4.810948346 | -1.165662082 | -0.540123037 |
| C | -4.790571345 | 0.137219010  | -1.050616074 |
| C | -3.685827264 | 0.929096065  | -0.907771063 |
| C | -2.523751183 | 0.440946034  | -0.257954017 |
| C | 0.040496003  | 0.914441067  | -0.099386007 |
| C | 0.491179036  | -0.347282026 | -0.535474040 |
| C | 1.048018074  | 1.811008131  | 0.357698028  |
| C | 1.838586134  | -0.717825054 | -0.513259036 |
| C | 2.386226171  | 1.450321103  | 0.359802026  |
| C | 2.785787200  | 0.174232011  | -0.079831008 |
| H | -1.720094125 | -1.240747089 | 0.826779062  |
| H | -3.711830267 | -2.643340188 | 0.546715040  |
| H | -5.684705410 | -1.779139129 | -0.655876046 |
| H | -5.651117408 | 0.519383035  | -1.567865113 |
| H | -3.698844267 | 1.926505140  | -1.304084092 |
| C | -1.360005099 | 1.290065091  | -0.145997013 |
| O | -1.611987118 | 2.627346187  | -0.284269023 |
| H | 2.106554153  | -1.695316120 | -0.863493062 |
| H | 3.124235225  | 2.142898153  | 0.714352053  |
| O | 4.109026296  | -0.055261006 | -0.022121001 |
| C | 4.611448333  | -1.299216095 | -0.421291031 |
| H | 5.679532411  | -1.250818089 | -0.274891018 |
| H | 4.402136315  | -1.493109105 | -1.467887105 |
| H | 4.204148304  | -2.102346152 | 0.183449014  |
| H | -0.217691016 | -1.041473077 | -0.938709067 |
| O | 0.773595055  | 3.066632218  | 0.798366059  |
| H | -0.140062010 | 3.169537227  | 1.033570074  |
| C | 3.436240248  | 5.480417395  | 1.702634122  |
| O | 2.188613156  | 5.744867412  | 1.138320081  |
| H | 1.781169127  | 4.926083356  | 0.886993061  |
| H | 3.368619243  | 4.790811342  | 2.541462185  |
| H | 3.836608278  | 6.417518462  | 2.066139151  |
| H | 4.137339295  | 5.070975363  | 0.977314072  |
| C | -4.494802321 | 5.797057418  | -0.425767029 |
| O | -4.232712302 | 4.444071321  | -0.186532012 |
| H | -3.300889239 | 4.310523308  | -0.078216006 |
| H | -5.567351401 | 5.906987424  | -0.506800037 |
| H | -4.042034293 | 6.143423443  | -1.351794099 |
| H | -4.147729299 | 6.429482461  | 0.387551028  |

## Coord\_10

|   |              |              |              |
|---|--------------|--------------|--------------|
| C | -2.545250184 | -0.782042057 | 0.261420017  |
| C | -3.680641263 | -1.576236115 | 0.124998011  |
| C | -4.793766347 | -1.102078080 | -0.555625041 |
| C | -4.771452345 | 0.194031014  | -1.090514081 |
| C | -3.669317262 | 0.986644070  | -0.961577070 |
| C | -2.504846178 | 0.510357039  | -0.301424023 |
| C | 0.064005004  | 0.980752073  | -0.116557009 |
| C | 0.518421039  | -0.285990018 | -0.513839036 |
| C | 1.054626074  | 1.885308135  | 0.352621028  |
| C | 1.859994132  | -0.654852046 | -0.456712034 |
| C | 2.384662172  | 1.529515108  | 0.391039026  |
| C | 2.796089201  | 0.250946017  | -0.017485001 |
| H | -1.705765121 | -1.151708085 | 0.818526061  |
| H | -3.696498266 | -2.558752184 | 0.560308043  |
| H | -5.667693409 | -1.716907123 | -0.662223046 |
| H | -5.630975403 | 0.566026041  | -1.616744114 |
| H | -3.682103264 | 1.975556140  | -1.378782102 |
| C | -1.339641099 | 1.348153095  | -0.208036013 |
| O | -1.578431115 | 2.689718192  | -0.442020031 |
| H | 2.138669153  | -1.637289120 | -0.783881054 |
| H | 3.114399223  | 2.227306163  | 0.753184053  |
| O | 4.118146296  | 0.023148001  | 0.071238005  |
| C | 4.629837332  | -1.227782088 | -0.292166019 |
| H | 5.694462412  | -1.175303083 | -0.123305009 |
| H | 4.444196318  | -1.442855105 | -1.339113096 |
| H | 4.210285305  | -2.019571146 | 0.319160023  |
| H | -0.183955014 | -0.988200073 | -0.915301065 |
| O | 0.761654054  | 3.150103224  | 0.768008054  |
| H | -0.147436010 | 3.247820233  | 1.015736071  |
| C | 3.378310241  | 5.632120405  | 1.623142116  |
| O | 2.127133153  | 5.852770421  | 1.047896077  |
| H | 1.741305126  | 5.018526362  | 0.813450061  |
| H | 3.323218238  | 4.963406360  | 2.479633179  |
| H | 3.755633268  | 6.587486474  | 1.963152141  |
| H | 4.091381294  | 5.219862377  | 0.911312063  |
| C | -4.420860321 | 5.961699431  | -0.604660044 |
| O | -4.138316299 | 4.610204333  | -0.375253028 |
| H | -3.201185228 | 4.484727321  | -0.331363025 |
| H | -5.496695395 | 6.068141439  | -0.608186042 |
| H | -4.037447289 | 6.301702454  | -1.563657111 |
| H | -4.017269290 | 6.600492476  | 0.176879014  |

LIIC path connecting S1-NP-ENOL and S<sub>1</sub>/T<sub>1</sub>-ENOL

## Coord\_1

|   |              |              |             |
|---|--------------|--------------|-------------|
| C | -2.545250184 | -0.782042057 | 0.261420017 |
| C | -3.680641263 | -1.576236115 | 0.124998011 |



|   |              |              |              |
|---|--------------|--------------|--------------|
| C | -4.793766347 | -1.102078080 | -0.555625041 |
| C | -4.771452345 | 0.194031014  | -1.090514081 |
| C | -3.669317262 | 0.986644070  | -0.961577070 |
| C | -2.504846178 | 0.510357039  | -0.301424023 |
| C | 0.064005004  | 0.980752073  | -0.116557009 |
| C | 0.518421039  | -0.285990018 | -0.513839036 |
| C | 1.054626074  | 1.885308135  | 0.352621028  |
| C | 1.859994132  | -0.654852046 | -0.456712034 |
| C | 2.384662172  | 1.529515108  | 0.391039026  |
| C | 2.796089201  | 0.250946017  | -0.017485001 |
| H | -1.705765121 | -1.151708085 | 0.818526061  |
| H | -3.696498266 | -2.558752184 | 0.560308043  |
| H | -5.667693409 | -1.716907123 | -0.662223046 |
| H | -5.630975403 | 0.566026041  | -1.616744114 |
| H | -3.682103264 | 1.975556140  | -1.378782102 |
| C | -1.339641099 | 1.348153095  | -0.208036013 |
| O | -1.578431115 | 2.689718192  | -0.442020031 |
| H | 2.138669153  | -1.637289120 | -0.783881054 |
| H | 3.114399223  | 2.227306163  | 0.753184053  |
| O | 4.118146296  | 0.023148001  | 0.071238005  |
| C | 4.629837332  | -1.227782088 | -0.292166019 |
| H | 5.694462412  | -1.175303083 | -0.123305009 |
| H | 4.444196318  | -1.442855105 | -1.339113096 |
| H | 4.210285305  | -2.019571146 | 0.319160023  |
| H | -0.183955014 | -0.988200073 | -0.915301065 |
| O | 0.761654054  | 3.150103224  | 0.768008054  |
| H | -0.147436010 | 3.247820233  | 1.015736071  |
| C | 3.378310241  | 5.632120405  | 1.623142116  |
| O | 2.127133153  | 5.852770421  | 1.047896077  |
| H | 1.741305126  | 5.018526362  | 0.813450061  |
| H | 3.323218238  | 4.963406360  | 2.479633179  |
| H | 3.755633268  | 6.587486474  | 1.963152141  |
| H | 4.091381294  | 5.219862377  | 0.911312063  |
| C | -4.420860321 | 5.961699431  | -0.604660044 |
| O | -4.138316299 | 4.610204333  | -0.375253028 |
| H | -3.201185228 | 4.484727321  | -0.331363025 |
| H | -5.496695395 | 6.068141439  | -0.608186042 |
| H | -4.037447289 | 6.301702454  | -1.563657111 |
| H | -4.017269290 | 6.600492476  | 0.176879014  |

Coord\_2

|   |              |              |              |
|---|--------------|--------------|--------------|
| C | -2.536504180 | -0.784015058 | 0.256981019  |
| C | -3.668773262 | -1.580288115 | 0.121863006  |
| C | -4.791233345 | -1.104879079 | -0.547723038 |
| C | -4.780122343 | 0.201863012  | -1.066671079 |
| C | -3.683504266 | 0.998057074  | -0.936865070 |
| C | -2.504430181 | 0.518629037  | -0.294711023 |

|   |              |              |              |
|---|--------------|--------------|--------------|
| C | 0.064244007  | 0.978185071  | -0.119258010 |
| C | 0.520531038  | -0.283905023 | -0.524225039 |
| C | 1.051352075  | 1.880250138  | 0.360039024  |
| C | 1.862381134  | -0.652864049 | -0.463963032 |
| C | 2.381493173  | 1.525337111  | 0.402693028  |
| C | 2.795643200  | 0.250312020  | -0.013595003 |
| H | -1.691458121 | -1.154966081 | 0.804464059  |
| H | -3.677900263 | -2.566818184 | 0.548075042  |
| H | -5.662993410 | -1.722557122 | -0.653633049 |
| H | -5.647984409 | 0.575766040  | -1.577574113 |
| H | -3.711005269 | 1.992006144  | -1.337395096 |
| C | -1.340728098 | 1.353281098  | -0.222715014 |
| O | -1.564551114 | 2.685607194  | -0.489023036 |
| H | 2.143195153  | -1.632638117 | -0.797270059 |
| H | 3.109263224  | 2.221368159  | 0.772210055  |
| O | 4.117508299  | 0.022743001  | 0.078810008  |
| C | 4.631641335  | -1.224673087 | -0.293173023 |
| H | 5.695763410  | -1.172445086 | -0.120920007 |
| H | 4.449157323  | -1.431540105 | -1.342342099 |
| H | 4.211191304  | -2.021800146 | 0.310589024  |
| H | -0.179644013 | -0.983987071 | -0.933481066 |
| O | 0.754544055  | 3.141971225  | 0.781559056  |
| H | -0.157428009 | 3.238647231  | 1.018710073  |
| C | 3.376011241  | 5.626803407  | 1.628902115  |
| O | 2.123197154  | 5.846855421  | 1.056948077  |
| H | 1.736123126  | 5.012318361  | 0.825562060  |
| H | 3.323363238  | 4.958723358  | 2.486050178  |
| H | 3.754085271  | 6.582506472  | 1.967188144  |
| H | 4.087149294  | 5.214131376  | 0.915378066  |
| C | -4.417634319 | 5.964255431  | -0.620108046 |
| O | -4.135617300 | 4.614616332  | -0.379296027 |
| H | -3.198110232 | 4.483426323  | -0.359480027 |
| H | -5.493153395 | 6.074436436  | -0.604730044 |
| H | -4.051191292 | 6.291125455  | -1.590453112 |
| H | -3.996995287 | 6.611138475  | 0.145861009  |

Coord\_3

|   |              |              |              |
|---|--------------|--------------|--------------|
| C | -2.527988184 | -0.785377054 | 0.251925016  |
| C | -3.657535263 | -1.583161113 | 0.118420010  |
| C | -4.788925344 | -1.106267079 | -0.540334041 |
| C | -4.788187343 | 0.210629013  | -1.043682075 |
| C | -3.696825266 | 1.009816075  | -0.913330065 |
| C | -2.503588181 | 0.527104038  | -0.289176020 |
| C | 0.064567006  | 0.975532072  | -0.122594006 |
| C | 0.522875039  | -0.282006023 | -0.534689038 |
| C | 1.047997076  | 1.875165136  | 0.366791024  |
| C | 1.864961133  | -0.651085045 | -0.470763034 |

|   |              |              |              |
|---|--------------|--------------|--------------|
| C | 2.378199171  | 1.521081108  | 0.414189028  |
| C | 2.795210201  | 0.249518016  | -0.009288003 |
| H | -1.677687119 | -1.157692085 | 0.789979055  |
| H | -3.660553261 | -2.573383183 | 0.535953041  |
| H | -5.658869405 | -1.726309126 | -0.645369047 |
| H | -5.663997407 | 0.586415045  | -1.539350111 |
| H | -3.737071270 | 2.008699146  | -1.297119093 |
| C | -1.341562097 | 1.358137098  | -0.238675016 |
| O | -1.551643110 | 2.679875194  | -0.537427038 |
| H | 2.148030156  | -1.628256117 | -0.809786059 |
| H | 3.103880221  | 2.215405157  | 0.791053057  |
| O | 4.116836296  | 0.022168002  | 0.087275008  |
| C | 4.633554332  | -1.221785086 | -0.292689021 |
| H | 5.697108409  | -1.169775086 | -0.116737009 |
| H | 4.454549321  | -1.420763103 | -1.343996095 |
| H | 4.212051302  | -2.023998147 | 0.303592020  |
| H | -0.174949015 | -0.980019072 | -0.951723070 |
| O | 0.747249055  | 3.133914227  | 0.793923055  |
| H | -0.167528013 | 3.229769235  | 1.020180075  |
| C | 3.373202241  | 5.621886403  | 1.633387120  |
| O | 2.118942150  | 5.841123420  | 1.064243077  |
| H | 1.730715125  | 5.006212359  | 0.836101059  |
| H | 3.322728241  | 4.954755354  | 2.491411177  |
| H | 3.751904272  | 6.578051472  | 1.969717140  |
| H | 4.082636296  | 5.208544376  | 0.918554066  |
| C | -4.414274318 | 5.965568431  | -0.633052044 |
| O | -4.132682297 | 4.617659334  | -0.382078028 |
| H | -3.195529228 | 4.480398323  | -0.386405026 |
| H | -5.489096394 | 6.079794436  | -0.598672044 |
| H | -4.065064293 | 6.280077451  | -1.613993118 |
| H | -3.976761285 | 6.619558479  | 0.117510010  |

Coord\_4

|   |              |              |              |
|---|--------------|--------------|--------------|
| C | -2.519744179 | -0.786234057 | 0.246252019  |
| C | -3.646931265 | -1.585022113 | 0.114682008  |
| C | -4.786863347 | -1.106434077 | -0.533448037 |
| C | -4.795706343 | 0.220170015  | -1.021566074 |
| C | -3.709375265 | 1.021825075  | -0.891009062 |
| C | -2.502390182 | 0.535701036  | -0.284839021 |
| C | 0.064912004  | 0.972736069  | -0.126576007 |
| C | 0.525435040  | -0.280342020 | -0.545234037 |
| C | 1.044465077  | 1.870041134  | 0.372859025  |
| C | 1.867726137  | -0.649519045 | -0.477115034 |
| C | 2.374690170  | 1.516783109  | 0.425511029  |
| C | 2.794748203  | 0.248601016  | -0.004577002 |
| H | -1.664476119 | -1.159971082 | 0.775080053  |
| H | -3.644416260 | -2.578628187 | 0.523971039  |

|   |              |              |              |
|---|--------------|--------------|--------------|
| H | -5.655322409 | -1.728396122 | -0.637413047 |
| H | -5.679081409 | 0.597808046  | -1.502102107 |
| H | -3.760457269 | 2.025593146  | -1.258050090 |
| C | -1.342201094 | 1.362621097  | -0.255932020 |
| O | -1.539730113 | 2.672445191  | -0.587194041 |
| H | 2.153203155  | -1.624150119 | -0.821424058 |
| H | 3.098131224  | 2.209486161  | 0.809691061  |
| O | 4.116091294  | 0.021507002  | 0.096623008  |
| C | 4.635580334  | -1.219026088 | -0.290720021 |
| H | 5.698498409  | -1.167164083 | -0.110762011 |
| H | 4.460384321  | -1.410450100 | -1.344084098 |
| H | 4.212903304  | -2.026091144 | 0.298173023  |
| H | -0.169859012 | -0.976379068 | -0.970021072 |
| O | 0.739626051  | 3.125922227  | 0.805071057  |
| H | -0.177873010 | 3.221134232  | 1.020118071  |
| C | 3.369672243  | 5.617439403  | 1.636542117  |
| O | 2.114147154  | 5.835604419  | 1.069729078  |
| H | 1.724882126  | 5.000229360  | 0.845024062  |
| H | 3.321123241  | 4.951577354  | 2.495671181  |
| H | 3.748853269  | 6.574205475  | 1.970680142  |
| H | 4.077645292  | 5.203185377  | 0.920788067  |
| C | -4.410321317 | 5.965833427  | -0.643392046 |
| O | -4.129261299 | 4.619455330  | -0.383517025 |
| H | -3.193216232 | 4.475704320  | -0.412062032 |
| H | -5.484042397 | 6.084526439  | -0.589905043 |
| H | -4.078560292 | 6.268755450  | -1.634201116 |
| H | -3.956010287 | 6.625902478  | 0.091957009  |

Coord\_5

|   |              |              |              |
|---|--------------|--------------|--------------|
| C | -2.511817183 | -0.786702056 | 0.239970018  |
| C | -3.636972260 | -1.586030117 | 0.110656006  |
| C | -4.785074347 | -1.105561077 | -0.527061037 |
| C | -4.802735346 | 0.230334018  | -1.000330070 |
| C | -3.721245267 | 1.033990077  | -0.869914062 |
| C | -2.500904178 | 0.544331039  | -0.281707022 |
| C | 0.065219006  | 0.969740069  | -0.131204011 |
| C | 0.528196038  | -0.278965021 | -0.555859038 |
| C | 1.040658075  | 1.864866135  | 0.378229026  |
| C | 1.870669135  | -0.648166045 | -0.483023034 |
| C | 2.370876173  | 1.512481110  | 0.436638034  |
| C | 2.794211199  | 0.247605019  | 0.000524002  |
| H | -1.651854120 | -1.161902082 | 0.759773056  |
| H | -3.629462261 | -2.582738185 | 0.512147039  |
| H | -5.652358408 | -1.729035125 | -0.629751047 |
| H | -5.693304408 | 0.609796043  | -1.465845105 |
| H | -3.781307271 | 2.042638146  | -1.220249086 |
| C | -1.342705099 | 1.366634097  | -0.274489018 |

|   |              |              |              |
|---|--------------|--------------|--------------|
| O | -1.528843111 | 2.663231194  | -0.638270044 |
| H | 2.158741153  | -1.620315119 | -0.832188058 |
| H | 3.091899220  | 2.203681161  | 0.828097057  |
| O | 4.115231296  | 0.020850002  | 0.106831007  |
| C | 4.637724333  | -1.216298090 | -0.287284021 |
| H | 5.699933411  | -1.164474084 | -0.103021010 |
| H | 4.466667322  | -1.400514099 | -1.342628098 |
| H | 4.213787305  | -2.027999145 | 0.294324020  |
| H | -0.164362014 | -0.973150071 | -0.988367071 |
| O | 0.731534052  | 3.117979223  | 0.814984061  |
| H | -0.188596015 | 3.212689229  | 1.018508076  |
| C | 3.365211241  | 5.613530403  | 1.638322116  |
| O | 2.108588152  | 5.830323421  | 1.073366076  |
| H | 1.718423126  | 4.994382359  | 0.852296063  |
| H | 3.318366238  | 4.949262357  | 2.498785178  |
| H | 3.744694269  | 6.571045472  | 1.970023142  |
| H | 4.071975295  | 5.198141376  | 0.922030067  |
| C | -4.405307315 | 5.965232430  | -0.651050045 |
| O | -4.125099299 | 4.620109335  | -0.383539029 |
| H | -3.190947231 | 4.469393320  | -0.436380033 |
| H | -5.477498395 | 6.088930437  | -0.578350039 |
| H | -4.091162294 | 6.257334450  | -1.651023121 |
| H | -3.934173285 | 6.630302475  | 0.069306006  |

Coord\_6

|   |              |              |              |
|---|--------------|--------------|--------------|
| C | -2.504259178 | -0.786899058 | 0.233089015  |
| C | -3.627681262 | -1.586348115 | 0.106349006  |
| C | -4.783591343 | -1.103818079 | -0.521164040 |
| C | -4.809334345 | 0.240985017  | -0.979969070 |
| C | -3.732525267 | 1.046221078  | -0.850041059 |
| C | -2.499201180 | 0.552899037  | -0.279771021 |
| C | 0.065428004  | 0.966487068  | -0.136471008 |
| C | 0.531140036  | -0.277918023 | -0.566561039 |
| C | 1.036483073  | 1.859629132  | 0.382895025  |
| C | 1.873782136  | -0.647022048 | -0.488496034 |
| C | 2.366672172  | 1.508213110  | 0.447555034  |
| C | 2.793557199  | 0.246577018  | 0.005996002  |
| H | -1.639858116 | -1.163595084 | 0.744072055  |
| H | -3.615679258 | -2.585891187 | 0.500486036  |
| H | -5.649992409 | -1.728424126 | -0.622375046 |
| H | -5.706734413 | 0.622251044  | -1.430578103 |
| H | -3.799758274 | 2.059779150  | -1.183746085 |
| C | -1.343134097 | 1.370071098  | -0.294334022 |
| O | -1.519020111 | 2.652141189  | -0.690593048 |
| H | 2.164669156  | -1.616743114 | -0.842085059 |
| H | 3.085072220  | 2.198063156  | 0.846244058  |
| O | 4.114219298  | 0.020296001  | 0.117868009  |

|   |              |              |              |
|---|--------------|--------------|--------------|
| C | 4.639990334  | -1.213492085 | -0.282418019 |
| H | 5.701413409  | -1.161555084 | -0.093559009 |
| H | 4.473400324  | -1.390853100 | -1.339663097 |
| H | 4.214750301  | -2.029633144 | 0.292019019  |
| H | -0.158451009 | -0.970407070 | -1.006744074 |
| O | 0.722838051  | 3.110067224  | 0.823656059  |
| H | -0.199825013 | 3.204373230  | 1.015353073  |
| C | 3.359612239  | 5.610225405  | 1.638683115  |
| O | 2.102044150  | 5.825304418  | 1.075126078  |
| H | 1.711141123  | 4.988686358  | 0.857895060  |
| H | 3.314281239  | 4.947876357  | 2.500714182  |
| H | 3.739194271  | 6.568649474  | 1.967695143  |
| H | 4.065428293  | 5.193500375  | 0.922230064  |
| C | -4.398759318 | 5.963928431  | -0.655969049 |
| O | -4.119942297 | 4.619719331  | -0.382072028 |
| H | -3.188502231 | 4.461506319  | -0.459287032 |
| H | -5.468962396 | 6.093289440  | -0.563955042 |
| H | -4.102351297 | 6.245973449  | -1.664425117 |
| H | -3.910677281 | 6.632868477  | 0.049629005  |

Coord\_7

|   |              |              |              |
|---|--------------|--------------|--------------|
| C | -2.497131181 | -0.786950055 | 0.225623018  |
| C | -3.619089260 | -1.586132116 | 0.101765008  |
| C | -4.782458343 | -1.101364077 | -0.515749038 |
| C | -4.815563349 | 0.251994021  | -0.960467068 |
| C | -3.743300268 | 1.058426075  | -0.831366060 |
| C | -2.497348181 | 0.561306039  | -0.279004021 |
| C | 0.065479006  | 0.962924070  | -0.142362010 |
| C | 0.534249037  | -0.277245020 | -0.577330040 |
| C | 1.031847073  | 1.854317134  | 0.386860029  |
| C | 1.877056135  | -0.646075049 | -0.493544035 |
| C | 2.361992171  | 1.504023111  | 0.458244034  |
| C | 2.792743203  | 0.245572016  | 0.011814999  |
| H | -1.628535115 | -1.165174085 | 0.727986051  |
| H | -3.603070261 | -2.588268188 | 0.488985036  |
| H | -5.648251405 | -1.726746126 | -0.615281044 |
| H | -5.719439414 | 0.635061044  | -1.396288100 |
| H | -3.815935275 | 2.076958148  | -1.148546082 |
| C | -1.343548099 | 1.372825100  | -0.315437023 |
| O | -1.510310107 | 2.639078189  | -0.744081051 |
| H | 2.171012155  | -1.613413118 | -0.851129063 |
| H | 3.077541223  | 2.192706157  | 0.864108061  |
| O | 4.113016298  | 0.019952004  | 0.129690009  |
| C | 4.642384337  | -1.210488089 | -0.276170018 |
| H | 5.702941408  | -1.158246081 | -0.082441005 |
| H | 4.480579323  | -1.381355099 | -1.335241096 |
| H | 4.215841301  | -2.030897148 | 0.291216019  |

|   |              |              |              |
|---|--------------|--------------|--------------|
| H | -0.152121012 | -0.968225071 | -1.025135073 |
| O | 0.713404053  | 3.102167222  | 0.831092058  |
| H | -0.211685013 | 3.196123230  | 1.010669071  |
| C | 3.352673244  | 5.607589404  | 1.637590116  |
| O | 2.094296149  | 5.820570419  | 1.074993080  |
| H | 1.702838120  | 4.983153360  | 0.861809061  |
| H | 3.308698239  | 4.947487353  | 2.501421179  |
| H | 3.732123267  | 6.567092470  | 1.963656140  |
| H | 4.057805294  | 5.189352371  | 0.921343068  |
| C | -4.390196314 | 5.962068431  | -0.658116048 |
| O | -4.113536294 | 4.618373332  | -0.379054029 |
| H | -3.185667227 | 4.452074322  | -0.480715032 |
| H | -5.457920393 | 6.097872437  | -0.546697038 |
| H | -4.111597293 | 6.234804448  | -1.674398119 |
| H | -3.884938279 | 6.633690480  | 0.032965001  |

Coord\_8

|   |              |              |              |
|---|--------------|--------------|--------------|
| C | -2.490498177 | -0.786984054 | 0.217590017  |
| C | -3.611243260 | -1.585535114 | 0.096905007  |
| C | -4.781726343 | -1.098346079 | -0.510806035 |
| C | -4.821485345 | 0.263246017  | -0.941798065 |
| C | -3.753654272 | 1.070522077  | -0.813847060 |
| C | -2.495415181 | 0.569451040  | -0.279370021 |
| C | 0.065315004  | 0.958998067  | -0.148853009 |
| C | 0.537504038  | -0.276982019 | -0.588156043 |
| C | 1.026663073  | 1.848921135  | 0.390133027  |
| C | 1.880484134  | -0.645306048 | -0.498180035 |
| C | 2.356757168  | 1.499953108  | 0.468690035  |
| C | 2.791730199  | 0.244647019  | 0.017951999  |
| H | -1.617942119 | -1.166773084 | 0.711529051  |
| H | -3.591655256 | -2.590043186 | 0.477629035  |
| H | -5.647176408 | -1.724162122 | -0.608467046 |
| H | -5.731487414 | 0.648131045  | -1.362946097 |
| H | -3.829954276 | 2.094114149  | -1.114626080 |
| C | -1.344010097 | 1.374788099  | -0.337757026 |
| O | -1.502768109 | 2.623943191  | -0.798642057 |
| H | 2.177793159  | -1.610299117 | -0.859343063 |
| H | 3.069201220  | 2.187683159  | 0.881661061  |
| O | 4.111588297  | 0.019927000  | 0.142246009  |
| C | 4.644911333  | -1.207158087 | -0.268607022 |
| H | 5.704520409  | -1.154375086 | -0.069752007 |
| H | 4.488196321  | -1.371893098 | -1.329428094 |
| H | 4.217112305  | -2.031687146 | 0.291857022  |
| H | -0.145366012 | -0.966669068 | -1.043518077 |
| O | 0.703105052  | 3.094256223  | 0.837309059  |
| H | -0.224294015 | 3.187870229  | 1.004489075  |
| C | 3.344192242  | 5.605684403  | 1.635016118  |

|   |              |             |              |
|---|--------------|-------------|--------------|
| O | 2.085125152  | 5.816138417 | 1.072966077  |
| H | 1.693321121  | 4.977792361 | 0.864043062  |
| H | 3.301454236  | 4.948153355 | 2.500876179  |
| H | 3.723252266  | 6.566447472 | 1.957874143  |
| H | 4.048908289  | 5.185787373 | 0.919330067  |
| C | -4.379132313 | 5.959779427 | -0.657481046 |
| O | -4.105628296 | 4.616145332 | -0.374427025 |
| H | -3.182234227 | 4.441116321 | -0.500600037 |
| H | -5.443847390 | 6.102931441 | -0.526580036 |
| H | -4.118365296 | 6.223939450 | -1.680954122 |
| H | -3.856372275 | 6.632830477 | 0.019324003  |

Coord\_9

|   |              |              |              |
|---|--------------|--------------|--------------|
| C | -2.484435177 | -0.787134055 | 0.209015017  |
| C | -3.604198260 | -1.584705115 | 0.091769008  |
| C | -4.781457346 | -1.094898076 | -0.506323036 |
| C | -4.827168349 | 0.274641018  | -0.923925067 |
| C | -3.763670269 | 1.082424078  | -0.797429055 |
| C | -2.493472180 | 0.577226040  | -0.280815019 |
| C | 0.064879004  | 0.954659067  | -0.155911011 |
| C | 0.540886036  | -0.277161019 | -0.599026042 |
| C | 1.020844076  | 1.843429133  | 0.392728027  |
| C | 1.884058134  | -0.644691044 | -0.502424037 |
| C | 2.350890170  | 1.496051109  | 0.478878036  |
| C | 2.790480203  | 0.243866017  | 0.024377000  |
| H | -1.608145116 | -1.168535086 | 0.694715048  |
| H | -3.581473256 | -2.591385185 | 0.466399031  |
| H | -5.646817409 | -1.720819124 | -0.601934046 |
| H | -5.742947414 | 0.661385046  | -1.330513098 |
| H | -3.841921275 | 2.111180152  | -1.081941076 |
| C | -1.344582096 | 1.375851100  | -0.361235028 |
| O | -1.496459109 | 2.606634189  | -0.854167059 |
| H | 2.185036156  | -1.607364114 | -0.866757064 |
| H | 3.059953218  | 2.183071157  | 0.898879065  |
| O | 4.109903297  | 0.020342002  | 0.155473011  |
| C | 4.647579333  | -1.203362087 | -0.259810016 |
| H | 5.706155408  | -1.149762084 | -0.055596002 |
| H | 4.496242324  | -1.362325097 | -1.322307094 |
| H | 4.218623302  | -2.031893144 | 0.293866023  |
| H | -0.138184007 | -0.965799069 | -1.061866076 |
| O | 0.691817051  | 3.086309224  | 0.842336058  |
| H | -0.237768016 | 3.179538227  | 0.996862070  |
| C | 3.333974242  | 5.604570405  | 1.630944115  |
| O | 2.074313151  | 5.812026419  | 1.069059076  |
| H | 1.682395119  | 4.972613356  | 0.864616061  |
| H | 3.292395235  | 4.949930358  | 2.499056180  |
| H | 3.712359269  | 6.566781473  | 1.950327139  |



|   |              |             |              |
|---|--------------|-------------|--------------|
| H | 4.038541289  | 5.182897372 | 0.916154067  |
| C | -4.365075312 | 5.957166429 | -0.654080045 |
| O | -4.095965297 | 4.613099334 | -0.368142024 |
| H | -3.178001227 | 4.428641317 | -0.518878036 |
| H | -5.426209388 | 6.108701441 | -0.503641039 |
| H | -4.122109299 | 6.213460449 | -1.684132122 |
| H | -3.824386273 | 6.630323478 | 0.008679999  |

Coord\_10

|   |              |              |              |
|---|--------------|--------------|--------------|
| C | -2.469552178 | -0.786661055 | 0.212133014  |
| C | -3.585748257 | -1.587487116 | 0.103219007  |
| C | -4.770590342 | -1.103014079 | -0.489884034 |
| C | -4.825860350 | 0.271153021  | -0.904117063 |
| C | -3.769465273 | 1.083573080  | -0.784134054 |
| C | -2.486341178 | 0.581915043  | -0.280710020 |
| C | 0.068000007  | 0.956758070  | -0.161327013 |
| C | 0.552811040  | -0.272376018 | -0.598701043 |
| C | 1.014688072  | 1.851853132  | 0.391392030  |
| C | 1.897346135  | -0.633466046 | -0.491354035 |
| C | 2.345777169  | 1.511574110  | 0.489077033  |
| C | 2.795050199  | 0.260839017  | 0.040509005  |
| H | -1.588874116 | -1.163384085 | 0.693201050  |
| H | -3.557207257 | -2.593452188 | 0.479232034  |
| H | -5.633900404 | -1.732291126 | -0.579618043 |
| H | -5.748039412 | 0.653934045  | -1.299760095 |
| H | -3.851235276 | 2.115423153  | -1.059855075 |
| C | -1.342683096 | 1.376446102  | -0.387819030 |
| O | -1.492456106 | 2.583363186  | -0.921179065 |
| H | 2.205914156  | -1.595344112 | -0.851445061 |
| H | 3.048457218  | 2.203529160  | 0.911781068  |
| O | 4.114647296  | 0.044318002  | 0.181438014  |
| C | 4.661612336  | -1.177021083 | -0.228686017 |
| H | 5.718691411  | -1.117220080 | -0.018394000 |
| H | 4.517371323  | -1.338533097 | -1.291800094 |
| H | 4.233993303  | -2.007052146 | 0.323815026  |
| H | -0.119393008 | -0.965811071 | -1.064656078 |
| O | 0.675202049  | 3.094318221  | 0.833918060  |
| H | -0.256870019 | 3.184900227  | 0.974107072  |
| C | 3.308343240  | 5.634694408  | 1.597541113  |
| O | 2.047976148  | 5.830402422  | 1.032983074  |
| H | 1.659228120  | 4.987066361  | 0.838821062  |
| H | 3.269335236  | 4.989260357  | 2.472645176  |
| H | 3.682194266  | 6.602018475  | 1.906717139  |
| H | 4.015083290  | 5.208555372  | 0.887559064  |
| C | -4.360151313 | 5.942669428  | -0.684713047 |
| O | -4.092620293 | 4.600604332  | -0.387243026 |
| H | -3.180290231 | 4.407835316  | -0.560427039 |

|   |              |             |              |
|---|--------------|-------------|--------------|
| H | -5.417771392 | 6.101358440 | -0.516746039 |
| H | -4.134837298 | 6.185255445 | -1.722292126 |
| H | -3.803863276 | 6.620969477 | -0.040054003 |

LIIC path connecting S<sub>1</sub>/T<sub>1</sub>-ENOL and T1-PP-ENOL

Coord\_1

|   |              |              |              |
|---|--------------|--------------|--------------|
| C | -2.469552178 | -0.786661055 | 0.212133014  |
| C | -3.585748257 | -1.587487116 | 0.103219007  |
| C | -4.770590342 | -1.103014079 | -0.489884034 |
| C | -4.825860350 | 0.271153021  | -0.904117063 |
| C | -3.769465273 | 1.083573080  | -0.784134054 |
| C | -2.486341178 | 0.581915043  | -0.280710020 |
| C | 0.068000007  | 0.956758070  | -0.161327013 |
| C | 0.552811040  | -0.272376018 | -0.598701043 |
| C | 1.014688072  | 1.851853132  | 0.391392030  |
| C | 1.897346135  | -0.633466046 | -0.491354035 |
| C | 2.345777169  | 1.511574110  | 0.489077033  |
| C | 2.795050199  | 0.260839017  | 0.040509005  |
| H | -1.588874116 | -1.163384085 | 0.693201050  |
| H | -3.557207257 | -2.593452188 | 0.479232034  |
| H | -5.633900404 | -1.732291126 | -0.579618043 |
| H | -5.748039412 | 0.653934045  | -1.299760095 |
| H | -3.851235276 | 2.115423153  | -1.059855075 |
| C | -1.342683096 | 1.376446102  | -0.387819030 |
| O | -1.492456106 | 2.583363186  | -0.921179065 |
| H | 2.205914156  | -1.595344112 | -0.851445061 |
| H | 3.048457218  | 2.203529160  | 0.911781068  |
| O | 4.114647296  | 0.044318002  | 0.181438014  |
| C | 4.661612336  | -1.177021083 | -0.228686017 |
| H | 5.718691411  | -1.117220080 | -0.018394000 |
| H | 4.517371323  | -1.338533097 | -1.291800094 |
| H | 4.233993303  | -2.007052146 | 0.323815026  |
| H | -0.119393008 | -0.965811071 | -1.064656078 |
| O | 0.675202049  | 3.094318221  | 0.833918060  |
| H | -0.256870019 | 3.184900227  | 0.974107072  |
| C | 3.308343240  | 5.634694408  | 1.597541113  |
| O | 2.047976148  | 5.830402422  | 1.032983074  |
| H | 1.659228120  | 4.987066361  | 0.838821062  |
| H | 3.269335236  | 4.989260357  | 2.472645176  |
| H | 3.682194266  | 6.602018475  | 1.906717139  |
| H | 4.015083290  | 5.208555372  | 0.887559064  |
| C | -4.360151313 | 5.942669428  | -0.684713047 |
| O | -4.092620293 | 4.600604332  | -0.387243026 |
| H | -3.180290231 | 4.407835316  | -0.560427039 |
| H | -5.417771392 | 6.101358440  | -0.516746039 |
| H | -4.134837298 | 6.185255445  | -1.722292126 |
| H | -3.803863276 | 6.620969477  | -0.040054003 |

## Coord\_2

|   |              |              |              |
|---|--------------|--------------|--------------|
| C | -2.474542176 | -0.775232054 | 0.234585015  |
| C | -3.586172260 | -1.584847114 | 0.111524010  |
| C | -4.763907341 | -1.110875081 | -0.502161036 |
| C | -4.822588346 | 0.254654020  | -0.928767065 |
| C | -3.764207273 | 1.071438077  | -0.791184055 |
| C | -2.497664179 | 0.584839044  | -0.260946017 |
| C | 0.058855004  | 0.982155070  | -0.145787009 |
| C | 0.536215037  | -0.259959017 | -0.594423042 |
| C | 1.017764074  | 1.879552137  | 0.373285029  |
| C | 1.887101136  | -0.632575044 | -0.483629037 |
| C | 2.353474169  | 1.534762112  | 0.448161032  |
| C | 2.791125201  | 0.263767019  | 0.018728001  |
| H | -1.597313117 | -1.146192085 | 0.726981053  |
| H | -3.557653258 | -2.589490185 | 0.491035037  |
| H | -5.620994406 | -1.747415128 | -0.602363045 |
| H | -5.739223414 | 0.628404048  | -1.345493095 |
| H | -3.852972280 | 2.094870153  | -1.074723077 |
| C | -1.354934099 | 1.404579101  | -0.334377023 |
| O | -1.504935111 | 2.636064191  | -0.783510059 |
| H | 2.184518155  | -1.605238113 | -0.823707061 |
| H | 3.068015223  | 2.231639161  | 0.841247059  |
| O | 4.110610293  | 0.048667003  | 0.156665010  |
| C | 4.652415336  | -1.181447085 | -0.234344017 |
| H | 5.711148413  | -1.119973082 | -0.033277004 |
| H | 4.498923326  | -1.362300098 | -1.292986092 |
| H | 4.226915303  | -1.999613146 | 0.337011024  |
| H | -0.133965009 | -0.916036066 | -1.114743081 |
| O | 0.700463050  | 3.128011223  | 0.812545056  |
| H | -0.232387014 | 3.234161231  | 0.940509069  |
| C | 3.359896243  | 5.614553403  | 1.622989115  |
| O | 2.113293152  | 5.836351422  | 1.038080077  |
| H | 1.711137122  | 5.001134359  | 0.836418062  |
| H | 3.293800238  | 4.966734356  | 2.494662178  |
| H | 3.747025269  | 6.573330475  | 1.942207141  |
| H | 4.070375291  | 5.177537373  | 0.923329065  |
| C | -4.396663315 | 5.915737423  | -0.714743052 |
| O | -4.168776298 | 4.575843330  | -0.377952028 |
| H | -3.245157233 | 4.377159313  | -0.459075033 |
| H | -5.463455391 | 6.085314437  | -0.644734045 |
| H | -4.076836291 | 6.143190441  | -1.730553122 |
| H | -3.894755279 | 6.598243473  | -0.031309005 |

## Coord\_3

|   |              |              |             |
|---|--------------|--------------|-------------|
| C | -2.482077179 | -0.765754056 | 0.256250019 |
| C | -3.589364258 | -1.583340113 | 0.119478010 |

|   |              |              |              |
|---|--------------|--------------|--------------|
| C | -4.758184342 | -1.119395083 | -0.516117038 |
| C | -4.817517346 | 0.236653019  | -0.957328068 |
| C | -3.757753268 | 1.057726074  | -0.803185059 |
| C | -2.509359182 | 0.585105040  | -0.244193017 |
| C | 0.047965002  | 1.005750072  | -0.131145008 |
| C | 0.518467035  | -0.249602018 | -0.589623044 |
| C | 1.017546074  | 1.906465139  | 0.353062023  |
| C | 1.875957134  | -0.632304047 | -0.474199035 |
| C | 2.357631168  | 1.557840114  | 0.405550029  |
| C | 2.785021200  | 0.266863018  | -0.002206002 |
| H | -1.609295114 | -1.130849082 | 0.761426053  |
| H | -3.562172257 | -2.586044188 | 0.504155034  |
| H | -5.609599404 | -1.762231128 | -0.626359047 |
| H | -5.727108414 | 0.601815045  | -1.396608099 |
| H | -3.849769276 | 2.073446147  | -1.097293080 |
| C | -1.368265101 | 1.428843105  | -0.282800021 |
| O | -1.522008110 | 2.677706192  | -0.647769046 |
| H | 2.163299158  | -1.615309118 | -0.792655056 |
| H | 3.082787222  | 2.260025160  | 0.767891053  |
| O | 4.104554294  | 0.054594005  | 0.133311010  |
| C | 4.642585334  | -1.183901086 | -0.236625015 |
| H | 5.702795408  | -1.119688078 | -0.044629005 |
| H | 4.480305320  | -1.385508098 | -1.290142092 |
| H | 4.219973302  | -1.989475142 | 0.354276024  |
| H | -0.145321010 | -0.867950063 | -1.162225086 |
| O | 0.720296053  | 3.160729225  | 0.786643058  |
| H | -0.213172017 | 3.281200236  | 0.901576065  |
| C | 3.397500245  | 5.601343403  | 1.641609116  |
| O | 2.165304158  | 5.844747422  | 1.035343072  |
| H | 1.752259126  | 5.016494363  | 0.827208061  |
| H | 3.305378239  | 4.953038354  | 2.510519180  |
| H | 3.794884271  | 6.552913473  | 1.969590143  |
| H | 4.112982298  | 5.153906370  | 0.953635067  |
| C | -4.409625316 | 5.889241423  | -0.730317050 |
| O | -4.231658303 | 4.548503329  | -0.368972028 |
| H | -3.307165239 | 4.337834310  | -0.363364024 |
| H | -5.475556394 | 6.075723438  | -0.751836054 |
| H | -4.001532289 | 6.105809440  | -1.716297124 |
| H | -3.957021285 | 6.568533473  | -0.010463999 |

Coord\_4

|   |              |              |              |
|---|--------------|--------------|--------------|
| C | -2.491840181 | -0.757239054 | 0.276914020  |
| C | -3.595043261 | -1.581992113 | 0.127011007  |
| C | -4.752939344 | -1.127829084 | -0.532093037 |
| C | -4.809885346 | 0.217692016  | -0.990481070 |
| C | -3.749308272 | 1.043021074  | -0.821057058 |
| C | -2.520774180 | 0.583501040  | -0.231136018 |

|   |              |              |              |
|---|--------------|--------------|--------------|
| C | 0.035951001  | 1.027755072  | -0.117738006 |
| C | 0.499849034  | -0.241343016 | -0.584399043 |
| C | 1.014866071  | 1.932456140  | 0.330438023  |
| C | 1.864052133  | -0.633120043 | -0.462762033 |
| C | 2.358958170  | 1.580118111  | 0.361303027  |
| C | 2.777116202  | 0.269308018  | -0.021900000 |
| H | -1.624673116 | -1.116190079 | 0.796592056  |
| H | -3.570675257 | -2.581968185 | 0.518888038  |
| H | -5.599286401 | -1.776004130 | -0.651850045 |
| H | -5.710764410 | 0.574558040  | -1.453976104 |
| H | -3.840671274 | 2.051680150  | -1.128725081 |
| C | -1.381949100 | 1.449943106  | -0.233796017 |
| O | -1.542840109 | 2.709204197  | -0.515048037 |
| H | 2.142127152  | -1.626094116 | -0.757804057 |
| H | 3.093662222  | 2.287690166  | 0.691823052  |
| O | 4.096749294  | 0.060827004  | 0.112073010  |
| C | 4.632042335  | -1.185813083 | -0.234525017 |
| H | 5.693535409  | -1.118173081 | -0.051231004 |
| H | 4.461640323  | -1.409672104 | -1.282197093 |
| H | 4.212625306  | -1.977759142 | 0.376578025  |
| H | -0.153247011 | -0.821627061 | -1.207438086 |
| O | 0.735755050  | 3.192510230  | 0.755752055  |
| H | -0.198200015 | 3.326220239  | 0.856602063  |
| C | 3.422787245  | 5.595068404  | 1.653368117  |
| O | 2.205677159  | 5.855746424  | 1.024421076  |
| H | 1.784101129  | 5.033238362  | 0.810810059  |
| H | 3.305442238  | 4.948096357  | 2.520192181  |
| H | 3.827571274  | 6.540866472  | 1.988839145  |
| H | 4.144617298  | 5.137538367  | 0.978692070  |
| C | -4.403622319 | 5.863147423  | -0.730474052 |
| O | -4.283027306 | 4.518815326  | -0.360352027 |
| H | -3.366689244 | 4.290127309  | -0.274848022 |
| H | -5.460103392 | 6.072822435  | -0.835715061 |
| H | -3.914340283 | 6.072525435  | -1.680245120 |
| H | -3.995279287 | 6.531847471  | 0.024664999  |

Coord\_5

|   |              |              |              |
|---|--------------|--------------|--------------|
| C | -2.503496178 | -0.748478054 | 0.296414022  |
| C | -3.602919260 | -1.579595115 | 0.134089012  |
| C | -4.747626341 | -1.135198083 | -0.550392039 |
| C | -4.798807343 | 0.198503012  | -1.028814072 |
| C | -3.737944270 | 1.028092074  | -0.845625059 |
| C | -2.531192183 | 0.581008044  | -0.222358015 |
| C | 0.023463000  | 1.048626077  | -0.105811007 |
| C | 0.480569032  | -0.234973019 | -0.578831040 |
| C | 1.010691075  | 1.957503142  | 0.305236020  |
| C | 1.851402135  | -0.635335047 | -0.449069032 |

|   |              |              |              |
|---|--------------|--------------|--------------|
| C | 2.358291169  | 1.600917116  | 0.315519024  |
| C | 2.767768201  | 0.270335018  | -0.040007001 |
| H | -1.643318121 | -1.100812077 | 0.832590058  |
| H | -3.583105260 | -2.575857187 | 0.535539039  |
| H | -5.589572400 | -1.787747129 | -0.679068049 |
| H | -5.689090410 | 0.547202037  | -1.518372112 |
| H | -3.824519276 | 2.030242148  | -1.170062085 |
| C | -1.395254098 | 1.468843106  | -0.187924012 |
| O | -1.566803112 | 2.731667195  | -0.386163028 |
| H | 2.120632152  | -1.637950120 | -0.718782050 |
| H | 3.101743224  | 2.313541168  | 0.613213046  |
| O | 4.087444294  | 0.066065007  | 0.093531005  |
| C | 4.620558331  | -1.188628083 | -0.227240014 |
| H | 5.683145411  | -1.117326079 | -0.052107004 |
| H | 4.442818319  | -1.436230102 | -1.268275091 |
| H | 4.204160300  | -1.965600141 | 0.404652031  |
| H | -0.157516011 | -0.776845055 | -1.250657092 |
| O | 0.748138052  | 3.223452234  | 0.719616049  |
| H | -0.186157015 | 3.369524242  | 0.805133056  |
| C | 3.437671249  | 5.595548404  | 1.658419119  |
| O | 2.236410160  | 5.869393424  | 1.005242073  |
| H | 1.808465132  | 5.051407362  | 0.787104056  |
| H | 3.295638239  | 4.951629356  | 2.523786183  |
| H | 3.847203279  | 6.537028471  | 2.000140144  |
| H | 4.167194301  | 5.128148371  | 0.998851072  |
| C | -4.383688318 | 5.836771419  | -0.714649054 |
| O | -4.324764309 | 4.486647324  | -0.352318026 |
| H | -3.424082247 | 4.234373305  | -0.195141016 |
| H | -5.423653388 | 6.075638436  | -0.894515062 |
| H | -3.820841277 | 6.042579437  | -1.623413118 |
| H | -4.015088291 | 6.487387465  | 0.075692006  |

Coord\_6

|   |              |              |              |
|---|--------------|--------------|--------------|
| C | -2.516652181 | -0.738063052 | 0.314644024  |
| C | -3.612633261 | -1.574741115 | 0.140703008  |
| C | -4.741588344 | -1.140347084 | -0.571255043 |
| C | -4.783260343 | 0.179954016  | -1.072767080 |
| C | -3.722593266 | 1.013849072  | -0.877557064 |
| C | -2.539808183 | 0.578780044  | -0.218293013 |
| C | 0.011168000  | 1.069101077  | -0.095479007 |
| C | 0.460722033  | -0.229998017 | -0.572963041 |
| C | 1.006128074  | 1.981723140  | 0.277430021  |
| C | 1.837863130  | -0.639083046 | -0.432936031 |
| C | 2.356581169  | 1.619591115  | 0.268360018  |
| C | 2.757287200  | 0.269247019  | -0.056235005 |
| H | -1.665072121 | -1.083085078 | 0.869562063  |
| H | -3.599354261 | -2.566087184 | 0.554386041  |

|   |              |              |              |
|---|--------------|--------------|--------------|
| H | -5.579863400 | -1.796291129 | -0.708223054 |
| H | -5.660815406 | 0.520412036  | -1.590403116 |
| H | -3.799968272 | 2.009884143  | -1.222154087 |
| C | -1.407457100 | 1.486768107  | -0.145539010 |
| O | -1.593536115 | 2.746339200  | -0.261651019 |
| H | 2.098146151  | -1.651033117 | -0.675360051 |
| H | 3.108349224  | 2.336415166  | 0.532305036  |
| O | 4.076833296  | 0.068979006  | 0.078119008  |
| C | 4.607715332  | -1.193810083 | -0.214226016 |
| H | 5.671238410  | -1.119156080 | -0.046595004 |
| H | 4.423412320  | -1.466542105 | -1.247759090 |
| H | 4.193669303  | -1.954162139 | 0.438931033  |
| H | -0.157943010 | -0.733050055 | -1.292062095 |
| O | 0.759012057  | 3.253739234  | 0.678235050  |
| H | -0.175416014 | 3.411552246  | 0.747036056  |
| C | 3.444416248  | 5.602420401  | 1.657109120  |
| O | 2.259889162  | 5.885640425  | 0.978056068  |
| H | 1.827497130  | 5.071014363  | 0.756265056  |
| H | 3.277971234  | 4.963156355  | 2.521540180  |
| H | 3.856307276  | 6.540986468  | 2.003903144  |
| H | 4.182895302  | 5.125289369  | 1.014593074  |
| C | -4.355363312 | 5.808857420  | -0.682748048 |
| O | -4.358931316 | 4.451464319  | -0.345284027 |
| H | -3.479703248 | 4.170928303  | -0.125902010 |
| H | -5.373397387 | 6.082097436  | -0.926931069 |
| H | -3.726876268 | 6.015134431  | -1.547135113 |
| H | -4.022902292 | 6.433626464  | 0.143454010  |

Coord\_7

|   |              |              |              |
|---|--------------|--------------|--------------|
| C | -2.530775181 | -0.724381052 | 0.331564022  |
| C | -3.623640259 | -1.565860113 | 0.146876008  |
| C | -4.733971340 | -1.142016082 | -0.594828042 |
| C | -4.762045341 | 0.162979010  | -1.122559081 |
| C | -3.702034264 | 1.001301073  | -0.917298064 |
| C | -2.545709182 | 0.578152042  | -0.219179015 |
| C | -0.000267002 | 1.090265077  | -0.086678006 |
| C | 0.440229031  | -0.225564014 | -0.566791041 |
| C | 1.002427072  | 2.005426143  | 0.247188017  |
| C | 1.823048130  | -0.644294044 | -0.414263028 |
| C | 2.354881172  | 1.635547116  | 0.220064016  |
| C | 2.745872196  | 0.265428021  | -0.070370006 |
| H | -1.689644123 | -1.061114078 | 0.907670065  |
| H | -3.619107263 | -2.550838185 | 0.575661041  |
| H | -5.569337403 | -1.800380129 | -0.739477056 |
| H | -5.624465406 | 0.494853035  | -1.670418118 |
| H | -3.765511271 | 1.991376143  | -1.285576091 |
| C | -1.417861101 | 1.505231106  | -0.106726007 |

|   |              |              |              |
|---|--------------|--------------|--------------|
| O | -1.622994116 | 2.754576199  | -0.141761013 |
| H | 2.073605149  | -1.665278119 | -0.627494043 |
| H | 3.115011227  | 2.355083169  | 0.449439033  |
| O | 4.065001295  | 0.068193003  | 0.066080004  |
| C | 4.592808329  | -1.202881086 | -0.195274014 |
| H | 5.657166406  | -1.125837081 | -0.034437003 |
| H | 4.402556318  | -1.501899110 | -1.220369087 |
| H | 4.179956299  | -1.944686141 | 0.479476033  |
| H | -0.154482010 | -0.689276047 | -1.331705097 |
| O | 0.770256058  | 3.283695238  | 0.631931046  |
| H | -0.163989013 | 3.452961249  | 0.682591052  |
| C | 3.445766248  | 5.615136403  | 1.650024119  |
| O | 2.278993164  | 5.904379427  | 0.943495068  |
| H | 1.843770134  | 5.092084365  | 0.718833052  |
| H | 3.254941233  | 4.981987361  | 2.513881181  |
| H | 3.857978275  | 6.552054470  | 2.000801144  |
| H | 4.194269300  | 5.128330371  | 1.026539076  |
| C | -4.324802310 | 5.777592416  | -0.635270048 |
| O | -4.387848318 | 4.412276320  | -0.339902025 |
| H | -3.533918256 | 4.100140294  | -0.068871006 |
| H | -5.317362385 | 6.089035437  | -0.932343065 |
| H | -3.638735262 | 5.989331431  | -1.453134103 |
| H | -4.026069290 | 6.368389456  | 0.227788014  |

Coord\_8

|   |              |              |              |
|---|--------------|--------------|--------------|
| C | -2.545045181 | -0.705577051 | 0.347224023  |
| C | -3.635003261 | -1.551256112 | 0.152707012  |
| C | -4.723544341 | -1.138949082 | -0.621091046 |
| C | -4.733714340 | 0.148466011  | -1.178098086 |
| C | -3.674873263 | 0.991514072  | -0.964987067 |
| C | -2.547823181 | 0.580682044  | -0.224998017 |
| C | -0.010204003 | 1.113699083  | -0.079100008 |
| C | 0.418718028  | -0.220313015 | -0.560249039 |
| C | 1.000994071  | 2.029216147  | 0.214939014  |
| C | 1.806193131  | -0.650630048 | -0.393077030 |
| C | 2.354310168  | 1.648292117  | 0.170971015  |
| C | 2.733512198  | 0.258361018  | -0.082305007 |
| H | -1.716435123 | -1.032637076 | 0.947095066  |
| H | -3.641550263 | -2.528142180 | 0.599578043  |
| H | -5.556722400 | -1.798842129 | -0.772869056 |
| H | -5.578321399 | 0.471026035  | -1.758400128 |
| H | -3.719551270 | 1.975455141  | -1.360541097 |
| C | -1.425820101 | 1.526121108  | -0.071218008 |
| O | -1.655535119 | 2.757872200  | -0.026465001 |
| H | 2.045351148  | -1.680343123 | -0.575404041 |
| H | 3.123464225  | 2.368259169  | 0.365076024  |
| O | 4.051803291  | 0.062232006  | 0.057410006  |



|   |              |              |              |
|---|--------------|--------------|--------------|
| C | 4.574672329  | -1.217497089 | -0.170621012 |
| H | 5.639850404  | -1.139846080 | -0.015910000 |
| H | 4.378710316  | -1.543573109 | -1.186292083 |
| H | 4.161373298  | -1.938569138 | 0.525849036  |
| H | -0.147363010 | -0.643969045 | -1.369492099 |
| O | 0.784142055  | 3.313887240  | 0.581448044  |
| H | -0.149441010 | 3.494780254  | 0.612620045  |
| C | 3.445174247  | 5.632943408  | 1.638073117  |
| O | 2.297302168  | 5.925486424  | 0.902695063  |
| H | 1.860446134  | 5.114714370  | 0.675823049  |
| H | 3.229774230  | 5.007195359  | 2.501510181  |
| H | 3.856153275  | 6.569240475  | 1.991873141  |
| H | 4.204433303  | 5.136405367  | 1.035508075  |
| C | -4.299001310 | 5.740592412  | -0.573512042 |
| O | -4.414199318 | 4.367549317  | -0.337188023 |
| H | -3.587120260 | 4.022347291  | -0.025926002 |
| H | -5.264755377 | 6.092083439  | -0.911066065 |
| H | -3.563495258 | 5.964306428  | -1.343658099 |
| H | -4.032893290 | 6.288916452  | 0.327244026  |

Coord\_9

|   |              |              |              |
|---|--------------|--------------|--------------|
| C | -2.558084182 | -0.679437049 | 0.361838025  |
| C | -3.644993264 | -1.529152109 | 0.158468012  |
| C | -4.708367337 | -1.130099079 | -0.649744046 |
| C | -4.696409339 | 0.137060008  | -1.238872087 |
| C | -3.639496261 | 0.985567072  | -1.020387073 |
| C | -2.544825181 | 0.588278045  | -0.235406018 |
| C | -0.018071001 | 1.141777085  | -0.072099003 |
| C | 0.395325028  | -0.212092014 | -0.553203039 |
| C | 1.003421073  | 2.054180148  | 0.181472013  |
| C | 1.785889129  | -0.657362045 | -0.369588027 |
| C | 2.356009171  | 1.657489117  | 0.121552009  |
| C | 2.719784197  | 0.247660017  | -0.092089007 |
| H | -1.744215124 | -0.994776074 | 0.988094074  |
| H | -3.664823266 | -2.495916180 | 0.626439043  |
| H | -5.539860399 | -1.790911127 | -0.808189060 |
| H | -5.520294399 | 0.448947030  | -1.853846135 |
| H | -3.660537264 | 1.962752141  | -1.446858104 |
| C | -1.430781101 | 1.551926114  | -0.038282005 |
| O | -1.692102119 | 2.757986201  | 0.084545009  |
| H | 2.010771145  | -1.695504120 | -0.519690038 |
| H | 3.135646224  | 2.374582171  | 0.279834020  |
| O | 4.036655291  | 0.049416006  | 0.051753006  |
| C | 4.551338327  | -1.239604088 | -0.141131011 |
| H | 5.617436403  | -1.164226085 | 0.007966001  |
| H | 4.349234312  | -1.592906113 | -1.146384081 |
| H | 4.135467299  | -1.937520139 | 0.576935041  |

|   |              |              |              |
|---|--------------|--------------|--------------|
| H | -0.137359009 | -0.594636041 | -1.405160100 |
| O | 0.803491056  | 3.345329243  | 0.528110036  |
| H | -0.128712010 | 3.538711253  | 0.538686040  |
| C | 3.447236250  | 5.654808409  | 1.622673117  |
| O | 2.319503170  | 5.948884430  | 0.857507062  |
| H | 1.881604133  | 5.139189369  | 0.628919043  |
| H | 3.206841233  | 5.037546363  | 2.485586179  |
| H | 3.856153275  | 6.591125473  | 1.978733140  |
| H | 4.217448301  | 5.148276369  | 1.042634076  |
| C | -4.286222309 | 5.694782410  | -0.499896036 |
| O | -4.441242318 | 4.315037312  | -0.338720023 |
| H | -3.639787261 | 3.937917283  | 0.000821003  |
| H | -5.226563375 | 6.085340435  | -0.864773062 |
| H | -3.509658252 | 5.939166428  | -1.221766089 |
| H | -4.052885289 | 6.191906446  | 0.438694030  |

Coord\_10

|   |              |              |              |
|---|--------------|--------------|--------------|
| C | -2.578486188 | -0.735807053 | 0.390876029  |
| C | -3.664826262 | -1.583054114 | 0.168210011  |
| C | -4.704628340 | -1.179017087 | -0.660382049 |
| C | -4.668483337 | 0.078489004  | -1.256158091 |
| C | -3.611395261 | 0.926666067  | -1.023365076 |
| C | -2.547440184 | 0.524556039  | -0.206564016 |
| C | -0.033370002 | 1.089458076  | -0.026326002 |
| C | 0.351649024  | -0.275816019 | -0.541001037 |
| C | 1.005283074  | 1.986073141  | 0.199334016  |
| C | 1.743178127  | -0.749114056 | -0.360360028 |
| C | 2.353191170  | 1.565669112  | 0.104642007  |
| C | 2.690949196  | 0.139226010  | -0.102580010 |
| H | -1.777685130 | -1.052686078 | 1.033468075  |
| H | -3.698261268 | -2.548139185 | 0.638848048  |
| H | -5.537050399 | -1.835154134 | -0.834141060 |
| H | -5.472475392 | 0.393670026  | -1.895383136 |
| H | -3.605607258 | 1.906053138  | -1.462526105 |
| C | -1.440857101 | 1.499104107  | 0.050867004  |
| O | -1.738941127 | 2.665981190  | 0.277831021  |
| H | 1.945814140  | -1.792959128 | -0.502702035 |
| H | 3.148413228  | 2.270417164  | 0.237104015  |
| O | 4.006073291  | -0.072519006 | 0.031629004  |
| C | 4.503075325  | -1.369144101 | -0.158121009 |
| H | 5.571480402  | -1.306192096 | -0.020529003 |
| H | 4.285357311  | -1.725813123 | -1.158858085 |
| H | 4.085593296  | -2.056856149 | 0.568679039  |
| H | -0.150002012 | -0.594185044 | -1.437738104 |
| O | 0.831180060  | 3.276348236  | 0.555861038  |
| H | -0.098118008 | 3.486479251  | 0.556524039  |
| C | 3.471170249  | 5.543593401  | 1.720880122  |

|   |              |             |              |
|---|--------------|-------------|--------------|
| O | 2.359988171  | 5.859396424 | 0.940463068  |
| H | 1.917111138  | 5.057327363 | 0.695296052  |
| H | 3.209706231  | 4.916922356 | 2.570750182  |
| H | 3.883127281  | 6.470683466 | 2.096949152  |
| H | 4.246486305  | 5.037338364 | 1.147316083  |
| C | -4.298659308 | 5.563532403 | -0.249057018 |
| O | -4.477743324 | 4.178010303 | -0.207614015 |
| H | -3.695704267 | 3.764223270 | 0.133435012  |
| H | -5.220090378 | 5.998552430 | -0.611517044 |
| H | -3.494331252 | 5.853720421 | -0.921711068 |
| H | -4.091298292 | 5.978250428 | 0.734430054  |

LIIC path connecting T2-NP-ENOL and T<sub>2</sub>/T<sub>1</sub>-ENOL and  
Coord\_1

|   |              |              |              |
|---|--------------|--------------|--------------|
| C | -2.681157195 | -0.782588057 | 0.402199030  |
| C | -3.810428276 | -1.561298113 | 0.145473011  |
| C | -4.796031343 | -1.096028076 | -0.716977053 |
| C | -4.653830335 | 0.150588012  | -1.317709094 |
| C | -3.540105254 | 0.918656065  | -1.073146076 |
| C | -2.525517180 | 0.459548032  | -0.218119014 |
| C | 0.000629001  | 1.019296073  | -0.006519998 |
| C | 0.435151030  | -0.320303025 | -0.350518024 |
| C | 1.077250079  | 1.966075141  | 0.239616020  |
| C | 1.733753126  | -0.682882052 | -0.409203030 |
| C | 2.394200174  | 1.579338115  | 0.179370010  |
| C | 2.755256197  | 0.258267020  | -0.129515010 |
| H | -1.938832139 | -1.133594083 | 1.095291081  |
| H | -3.922086284 | -2.515419182 | 0.627458043  |
| H | -5.668583406 | -1.691918124 | -0.908322064 |
| H | -5.416328389 | 0.518859039  | -1.979137141 |
| H | -3.453206248 | 1.884642134  | -1.535648109 |
| C | -1.362595099 | 1.338241097  | 0.054113004  |
| O | -1.716114124 | 2.603779188  | 0.414091029  |
| H | 1.978754144  | -1.690383124 | -0.685161049 |
| H | 3.164370229  | 2.303532166  | 0.363089027  |
| O | 4.073254295  | -0.008716999 | -0.146101012 |
| C | 4.525313327  | -1.297450093 | -0.454264034 |
| H | 5.601710404  | -1.258297089 | -0.388351028 |
| H | 4.241243306  | -1.589323113 | -1.459809103 |
| H | 4.153067300  | -2.029785145 | 0.254147021  |
| H | -0.311593021 | -1.045286074 | -0.599393043 |
| O | 0.851550061  | 3.273152233  | 0.538261037  |
| H | -0.056050004 | 3.509995253  | 0.403730030  |
| C | 3.476136249  | 5.635564407  | 1.706892121  |
| O | 2.323109168  | 5.869112420  | 0.958807071  |
| H | 1.929676139  | 5.037074363  | 0.728756052  |
| H | 3.283376234  | 4.998744361  | 2.567500182  |

|   |              |             |              |
|---|--------------|-------------|--------------|
| H | 3.834549275  | 6.591427474 | 2.065821147  |
| H | 4.266514309  | 5.178814373 | 1.113109082  |
| C | -4.217479306 | 5.544240400 | -0.278316022 |
| O | -4.529164324 | 4.182285298 | -0.196332014 |
| H | -3.921287284 | 3.752046272 | 0.388764030  |
| H | -4.956558356 | 6.005292433 | -0.918524067 |
| H | -3.234045230 | 5.713035411 | -0.711356053 |
| H | -4.255782308 | 6.030295434 | 0.693171051  |

Coord\_2

|   |              |              |              |
|---|--------------|--------------|--------------|
| C | -2.681417195 | -0.782671059 | 0.402328028  |
| C | -3.810741273 | -1.561255112 | 0.145550012  |
| C | -4.796392347 | -1.095854078 | -0.716816051 |
| C | -4.654138337 | 0.150768012  | -1.317492094 |
| C | -3.540288254 | 0.918701066  | -1.073007077 |
| C | -2.525646183 | 0.459435032  | -0.218078014 |
| C | 0.001259003  | 1.018623071  | -0.006507002 |
| C | 0.435694029  | -0.320562025 | -0.350521025 |
| C | 1.077335075  | 1.965373140  | 0.239606018  |
| C | 1.734575123  | -0.683079048 | -0.409268029 |
| C | 2.394495174  | 1.578904115  | 0.179344012  |
| C | 2.755740198  | 0.258067018  | -0.129605007 |
| H | -1.939132140 | -1.133707084 | 1.095438081  |
| H | -3.922419284 | -2.515414181 | 0.627444046  |
| H | -5.669001408 | -1.691664119 | -0.908125067 |
| H | -5.416659390 | 0.519151039  | -1.978823143 |
| H | -3.453306246 | 1.884673133  | -1.535509110 |
| C | -1.362297098 | 1.337405097  | 0.054161006  |
| O | -1.716158125 | 2.602934187  | 0.414484028  |
| H | 1.979691142  | -1.690540120 | -0.685265048 |
| H | 3.164519230  | 2.303247167  | 0.363127027  |
| O | 4.073821293  | -0.008660002 | -0.146245012 |
| C | 4.526007327  | -1.297319095 | -0.454474032 |
| H | 5.602406404  | -1.258048090 | -0.388602027 |
| H | 4.241858306  | -1.589182113 | -1.460006105 |
| H | 4.153798301  | -2.029710145 | 0.253910018  |
| H | -0.310957024 | -1.045642073 | -0.599443045 |
| O | 0.851493063  | 3.272507235  | 0.538362041  |
| H | -0.055915006 | 3.509742254  | 0.403595032  |
| C | 3.475783251  | 5.635482406  | 1.706960125  |
| O | 2.322717165  | 5.868662424  | 0.958813067  |
| H | 1.929590137  | 5.036487362  | 0.728722052  |
| H | 3.283149238  | 4.998617359  | 2.567563186  |
| H | 3.833853275  | 6.591477476  | 2.065880151  |
| H | 4.266315306  | 5.178970374  | 1.113203080  |
| C | -4.217803305 | 5.545124401  | -0.278678022 |
| O | -4.529890324 | 4.183265303  | -0.196366014 |

|   |              |             |              |
|---|--------------|-------------|--------------|
| H | -3.922810283 | 3.753264268 | 0.389713030  |
| H | -4.956241358 | 6.006008431 | -0.919723066 |
| H | -3.233979231 | 5.713466410 | -0.710972050 |
| H | -4.256828307 | 6.031603433 | 0.692557052  |

Coord\_3

|   |              |              |              |
|---|--------------|--------------|--------------|
| C | -2.681675196 | -0.782753055 | 0.402457031  |
| C | -3.811053276 | -1.561212111 | 0.145627012  |
| C | -4.796750346 | -1.095678078 | -0.716655054 |
| C | -4.654443334 | 0.150949012  | -1.317275094 |
| C | -3.540469253 | 0.918746067  | -1.072867078 |
| C | -2.525773180 | 0.459323032  | -0.218037018 |
| C | 0.001887999  | 1.017950074  | -0.006495000 |
| C | 0.436236034  | -0.320821026 | -0.350524025 |
| C | 1.077420077  | 1.964670144  | 0.239596017  |
| C | 1.735397126  | -0.683275050 | -0.409334028 |
| C | 2.394790175  | 1.578470116  | 0.179319013  |
| C | 2.756222199  | 0.257866020  | -0.129695009 |
| H | -1.939431141 | -1.133819079 | 1.095583081  |
| H | -3.922751280 | -2.515407180 | 0.627428044  |
| H | -5.669416410 | -1.691408119 | -0.907928065 |
| H | -5.416988390 | 0.519444039  | -1.978509140 |
| H | -3.453404250 | 1.884704138  | -1.535369110 |
| C | -1.361998097 | 1.336569098  | 0.054209002  |
| O | -1.716202121 | 2.602088186  | 0.414877032  |
| H | 1.980628140  | -1.690697122 | -0.685369047 |
| H | 3.164668230  | 2.302961168  | 0.363166027  |
| O | 4.074387296  | -0.008601998 | -0.146389012 |
| C | 4.526700327  | -1.297189092 | -0.454682031 |
| H | 5.603099404  | -1.257800091 | -0.388852026 |
| H | 4.242471305  | -1.589041114 | -1.460202107 |
| H | 4.154528301  | -2.029635145 | 0.253674016  |
| H | -0.310320022 | -1.045997077 | -0.599494041 |
| O | 0.851435060  | 3.271860237  | 0.538464040  |
| H | -0.055780002 | 3.509488254  | 0.403459028  |
| C | 3.475430253  | 5.635398404  | 1.707027124  |
| O | 2.322326166  | 5.868209421  | 0.958818067  |
| H | 1.929504141  | 5.035898362  | 0.728688052  |
| H | 3.282921237  | 4.998488361  | 2.567626185  |
| H | 3.833156274  | 6.591524472  | 2.065938148  |
| H | 4.266116309  | 5.179124375  | 1.113296082  |
| C | -4.218127304 | 5.546006402  | -0.279039021 |
| O | -4.530613328 | 4.184242302  | -0.196399014 |
| H | -3.924331281 | 3.754482270  | 0.390663030  |
| H | -4.955925355 | 6.006719434  | -0.920921065 |
| H | -3.233916233 | 5.713896409  | -0.710587052 |
| H | -4.257874305 | 6.032909432  | 0.691943048  |

## Coord\_4

|   |              |              |              |
|---|--------------|--------------|--------------|
| C | -2.681933191 | -0.782835056 | 0.402585028  |
| C | -3.811364274 | -1.561168110 | 0.145703013  |
| C | -4.797109345 | -1.095502079 | -0.716495052 |
| C | -4.654748336 | 0.151130011  | -1.317058095 |
| C | -3.540651253 | 0.918792069  | -1.072728079 |
| C | -2.525901183 | 0.459211031  | -0.217997018 |
| C | 0.002518000  | 1.017277072  | -0.006481998 |
| C | 0.436778033  | -0.321079021 | -0.350527026 |
| C | 1.077506079  | 1.963967143  | 0.239586016  |
| C | 1.736218124  | -0.683472047 | -0.409398032 |
| C | 2.395084175  | 1.578036111  | 0.179294015  |
| C | 2.756705200  | 0.257665018  | -0.129784012 |
| H | -1.939729142 | -1.133931079 | 1.095728080  |
| H | -3.923082280 | -2.515400179 | 0.627412047  |
| H | -5.669831407 | -1.691152124 | -0.907731063 |
| H | -5.417316390 | 0.519738039  | -1.978195142 |
| H | -3.453501248 | 1.884736137  | -1.535230111 |
| C | -1.361699096 | 1.335733098  | 0.054256004  |
| O | -1.716246122 | 2.601242185  | 0.415269031  |
| H | 1.981564143  | -1.690853123 | -0.685473052 |
| H | 3.164816225  | 2.302675164  | 0.363205028  |
| O | 4.074952293  | -0.008545001 | -0.146531011 |
| C | 4.527392327  | -1.297058095 | -0.454890034 |
| H | 5.603792404  | -1.257552092 | -0.389100031 |
| H | 4.243085304  | -1.588901115 | -1.460397103 |
| H | 4.155257301  | -2.029559144 | 0.253438018  |
| H | -0.309684025 | -1.046351075 | -0.599544043 |
| O | 0.851378062  | 3.271214233  | 0.538565039  |
| H | -0.055645004 | 3.509234254  | 0.403323029  |
| C | 3.475078249  | 5.635314408  | 1.707094123  |
| O | 2.321935168  | 5.867756424  | 0.958823068  |
| H | 1.929418139  | 5.035308361  | 0.728654053  |
| H | 3.282695236  | 4.998360359  | 2.567687183  |
| H | 3.832460274  | 6.591571474  | 2.065994146  |
| H | 4.265917307  | 5.179278371  | 1.113389080  |
| C | -4.218453304 | 5.546886397  | -0.279400021 |
| O | -4.531335327 | 4.185218300  | -0.196429013 |
| H | -3.925850285 | 3.755701273  | 0.391614030  |
| H | -4.955612357 | 6.007426430  | -0.922116069 |
| H | -3.233855235 | 5.714327413  | -0.710202049 |
| H | -4.258922309 | 6.034215436  | 0.691328049  |

## Coord\_5

|   |              |              |             |
|---|--------------|--------------|-------------|
| C | -2.682190191 | -0.782916057 | 0.402713031 |
| C | -3.811675276 | -1.561124114 | 0.145778008 |

|   |              |              |              |
|---|--------------|--------------|--------------|
| C | -4.797467344 | -1.095326080 | -0.716336050 |
| C | -4.655053337 | 0.151312011  | -1.316842095 |
| C | -3.540831253 | 0.918839065  | -1.072589075 |
| C | -2.526028180 | 0.459099031  | -0.217957017 |
| C | 0.003147001  | 1.016604075  | -0.006470002 |
| C | 0.437320032  | -0.321337021 | -0.350531026 |
| C | 1.077590075  | 1.963264141  | 0.239576019  |
| C | 1.737039126  | -0.683668049 | -0.409463030 |
| C | 2.395379170  | 1.577601111  | 0.179269012  |
| C | 2.757187196  | 0.257465020  | -0.129873009 |
| H | -1.940027137 | -1.134043080 | 1.095872080  |
| H | -3.923412280 | -2.515393183 | 0.627395044  |
| H | -5.670246409 | -1.690896124 | -0.907535066 |
| H | -5.417644390 | 0.520032040  | -1.977882144 |
| H | -3.453599246 | 1.884768137  | -1.535090112 |
| C | -1.361400100 | 1.334898094  | 0.054302005  |
| O | -1.716290123 | 2.600396190  | 0.415660029  |
| H | 1.982500142  | -1.691010120 | -0.685576051 |
| H | 3.164963225  | 2.302388164  | 0.363244028  |
| O | 4.075518296  | -0.008488003 | -0.146673011 |
| C | 4.528084326  | -1.296928092 | -0.455097033 |
| H | 5.604485404  | -1.257304093 | -0.389348030 |
| H | 4.243698308  | -1.588760116 | -1.460592105 |
| H | 4.155986300  | -2.029484144 | 0.253204016  |
| H | -0.309048023 | -1.046706074 | -0.599595045 |
| O | 0.851321059  | 3.270567234  | 0.538666037  |
| H | -0.055509005 | 3.508980254  | 0.403187031  |
| C | 3.474727251  | 5.635230406  | 1.707159122  |
| O | 2.321545169  | 5.867303422  | 0.958827069  |
| H | 1.929334137  | 5.034718360  | 0.728620053  |
| H | 3.282470235  | 4.998233361  | 2.567749187  |
| H | 3.831766274  | 6.591618476  | 2.066048149  |
| H | 4.265719305  | 5.179431372  | 1.113481078  |
| C | -4.218781304 | 5.547765397  | -0.279759020 |
| O | -4.532056325 | 4.186192299  | -0.196457017 |
| H | -3.927368282 | 3.756921269  | 0.392566030  |
| H | -4.955301354 | 6.008129432  | -0.923311068 |
| H | -3.233798232 | 5.714759412  | -0.709816052 |
| H | -4.259971307 | 6.035520435  | 0.690712049  |

Coord\_6

|   |              |              |              |
|---|--------------|--------------|--------------|
| C | -2.682448191 | -0.782997058 | 0.402840028  |
| C | -3.811985274 | -1.561079113 | 0.145852008  |
| C | -4.797824343 | -1.095149081 | -0.716176053 |
| C | -4.655358334 | 0.151494011  | -1.316626096 |
| C | -3.541012253 | 0.918886066  | -1.072451076 |
| C | -2.526154183 | 0.458988031  | -0.217918017 |

|   |              |              |              |
|---|--------------|--------------|--------------|
| C | 0.003776002  | 1.015931072  | -0.006459000 |
| C | 0.437862031  | -0.321596022 | -0.350534027 |
| C | 1.077676077  | 1.962560140  | 0.239566018  |
| C | 1.737860124  | -0.683865051 | -0.409528029 |
| C | 2.395673170  | 1.577167112  | 0.179245013  |
| C | 2.757670197  | 0.257264018  | -0.129962011 |
| H | -1.940325138 | -1.134154080 | 1.096016080  |
| H | -3.923742281 | -2.515385182 | 0.627377047  |
| H | -5.670661411 | -1.690639124 | -0.907340064 |
| H | -5.417972390 | 0.520327040  | -1.977569141 |
| H | -3.453696250 | 1.884801136  | -1.534951108 |
| C | -1.361101099 | 1.334062094  | 0.054348006  |
| O | -1.716334124 | 2.599550189  | 0.416051028  |
| H | 1.983436145  | -1.691167121 | -0.685679050 |
| H | 3.165111226  | 2.302102165  | 0.363284029  |
| O | 4.076082293  | -0.008431000 | -0.146814010 |
| C | 4.528776326  | -1.296798094 | -0.455303031 |
| H | 5.605178404  | -1.257056089 | -0.389594028 |
| H | 4.244311307  | -1.588620116 | -1.460785107 |
| H | 4.156714300  | -2.029409144 | 0.252970019  |
| H | -0.308413020 | -1.047060077 | -0.599646042 |
| O | 0.851264061  | 3.269921236  | 0.538766041  |
| H | -0.055372001 | 3.508726255  | 0.403051027  |
| C | 3.474377248  | 5.635146404  | 1.707224121  |
| O | 2.321156166  | 5.866849420  | 0.958830069  |
| H | 1.929251141  | 5.034128364  | 0.728585053  |
| H | 3.282246234  | 4.998105359  | 2.567810185  |
| H | 3.831072274  | 6.591666472  | 2.066102151  |
| H | 4.265522308  | 5.179584373  | 1.113572080  |
| C | -4.219110304 | 5.548644398  | -0.280118019 |
| O | -4.532776324 | 4.187165302  | -0.196483015 |
| H | -3.928885280 | 3.758143272  | 0.393518031  |
| H | -4.954993357 | 6.008828433  | -0.924503066 |
| H | -3.233744234 | 5.715192412  | -0.709430049 |
| H | -4.261023306 | 6.036826434  | 0.690097050  |

Coord\_7

|   |              |              |              |
|---|--------------|--------------|--------------|
| C | -2.682705191 | -0.783078054 | 0.402966030  |
| C | -3.812295276 | -1.561034112 | 0.145926008  |
| C | -4.798182347 | -1.094971076 | -0.716018051 |
| C | -4.655662336 | 0.151677011  | -1.316410096 |
| C | -3.541192252 | 0.918934068  | -1.072313077 |
| C | -2.526280180 | 0.458877030  | -0.217879017 |
| C | 0.004405999  | 1.015259075  | -0.006446998 |
| C | 0.438403030  | -0.321854022 | -0.350538027 |
| C | 1.077760079  | 1.961857144  | 0.239556016  |
| C | 1.738680126  | -0.684061048 | -0.409592028 |



|   |              |              |              |
|---|--------------|--------------|--------------|
| C | 2.395967171  | 1.576732112  | 0.179221015  |
| C | 2.758152199  | 0.257063020  | -0.130050008 |
| H | -1.940622139 | -1.134265080 | 1.096159079  |
| H | -3.924072281 | -2.515377181 | 0.627359044  |
| H | -5.671075407 | -1.690381124 | -0.907146063 |
| H | -5.418299389 | 0.520622035  | -1.977256143 |
| H | -3.453793248 | 1.884835136  | -1.534812109 |
| C | -1.360803098 | 1.333227095  | 0.054393002  |
| O | -1.716378126 | 2.598705188  | 0.416441032  |
| H | 1.984372143  | -1.691323123 | -0.685781049 |
| H | 3.165259226  | 2.301815166  | 0.363325024  |
| O | 4.076647295  | -0.008375003 | -0.146954009 |
| C | 4.529467326  | -1.296668091 | -0.455508034 |
| H | 5.605870403  | -1.256809090 | -0.389838026 |
| H | 4.244924306  | -1.588480112 | -1.460977103 |
| H | 4.157441300  | -2.029335143 | 0.252737017  |
| H | -0.307777024 | -1.047414076 | -0.599697044 |
| O | 0.851208064  | 3.269274237  | 0.538867040  |
| H | -0.055235003 | 3.508472255  | 0.402914028  |
| C | 3.474028250  | 5.635061408  | 1.707288125  |
| O | 2.320768168  | 5.866395423  | 0.958832069  |
| H | 1.929168140  | 5.033537363  | 0.728551054  |
| H | 3.282023234  | 4.997978361  | 2.567871183  |
| H | 3.830379274  | 6.591713473  | 2.066154148  |
| H | 4.265326306  | 5.179736374  | 1.113663083  |
| C | -4.219441304 | 5.549521398  | -0.280476018 |
| O | -4.533496328 | 4.188137300  | -0.196508013 |
| H | -3.930400283 | 3.759367270  | 0.394471026  |
| H | -4.954688355 | 6.009524433  | -0.925694069 |
| H | -3.233693232 | 5.715625411  | -0.709043051 |
| H | -4.262075305 | 6.038131432  | 0.689481051  |

Coord\_8

|   |              |              |              |
|---|--------------|--------------|--------------|
| C | -2.682961192 | -0.783158055 | 0.403092027  |
| C | -3.812604274 | -1.560988110 | 0.145999008  |
| C | -4.798539346 | -1.094793077 | -0.715860050 |
| C | -4.655966338 | 0.151861011  | -1.316195097 |
| C | -3.541372257 | 0.918982064  | -1.072175078 |
| C | -2.526406182 | 0.458767030  | -0.217840016 |
| C | 0.005035000  | 1.014587073  | -0.006436002 |
| C | 0.438945030  | -0.322112022 | -0.350541028 |
| C | 1.077845075  | 1.961154142  | 0.239546015  |
| C | 1.739501123  | -0.684257050 | -0.409656032 |
| C | 2.396261171  | 1.576297113  | 0.179197012  |
| C | 2.758634200  | 0.256862018  | -0.130137010 |
| H | -1.940919140 | -1.134376080 | 1.096301079  |
| H | -3.924402281 | -2.515369180 | 0.627339047  |

|   |              |              |              |
|---|--------------|--------------|--------------|
| H | -5.671488409 | -1.690123123 | -0.906952066 |
| H | -5.418626389 | 0.520919036  | -1.976943140 |
| H | -3.453890246 | 1.884869135  | -1.534674110 |
| C | -1.360504097 | 1.332392096  | 0.054438004  |
| O | -1.716423121 | 2.597859187  | 0.416830030  |
| H | 1.985307141  | -1.691479124 | -0.685884048 |
| H | 3.165407226  | 2.301528167  | 0.363365024  |
| O | 4.077211292  | -0.008319000 | -0.147094008 |
| C | 4.530158325  | -1.296539093 | -0.455712032 |
| H | 5.606562403  | -1.256562091 | -0.390082030 |
| H | 4.245538305  | -1.588340113 | -1.461169104 |
| H | 4.158168299  | -2.029260148 | 0.252505021  |
| H | -0.307142021 | -1.047768074 | -0.599749041 |
| O | 0.851151061  | 3.268627233  | 0.538967039  |
| H | -0.055098004 | 3.508218255  | 0.402778030  |
| C | 3.473679248  | 5.634977406  | 1.707351124  |
| O | 2.320381165  | 5.865940420  | 0.958834070  |
| H | 1.929087139  | 5.032945362  | 0.728516054  |
| H | 3.281801239  | 4.997852359  | 2.567931186  |
| H | 3.829687274  | 6.591760475  | 2.066204150  |
| H | 4.265130309  | 5.179888375  | 1.113753080  |
| C | -4.219774305 | 5.550398398  | -0.280832022 |
| O | -4.534214326 | 4.189107303  | -0.196530017 |
| H | -3.931914285 | 3.760591272  | 0.395425027  |
| H | -4.954384359 | 6.010216433  | -0.926883067 |
| H | -3.233645231 | 5.716060410  | -0.708656053 |
| H | -4.263130305 | 6.039437436  | 0.688864051  |

Coord\_9

|   |              |              |              |
|---|--------------|--------------|--------------|
| C | -2.683218192 | -0.783238056 | 0.403217030  |
| C | -3.812914276 | -1.560942114 | 0.146071008  |
| C | -4.798895345 | -1.094615078 | -0.715703053 |
| C | -4.656270334 | 0.152046012  | -1.315980097 |
| C | -3.541552257 | 0.919031066  | -1.072037080 |
| C | -2.526532179 | 0.458657036  | -0.217802016 |
| C | 0.005664001  | 1.013915071  | -0.006425000 |
| C | 0.439486034  | -0.322370023 | -0.350545023 |
| C | 1.077930077  | 1.960450141  | 0.239536019  |
| C | 1.740321126  | -0.684454047 | -0.409720031 |
| C | 2.396555171  | 1.575862113  | 0.179173013  |
| C | 2.759115201  | 0.256660020  | -0.130225007 |
| H | -1.941216140 | -1.134486080 | 1.096442078  |
| H | -3.924731281 | -2.515360179 | 0.627319044  |
| H | -5.671902411 | -1.689864123 | -0.906759065 |
| H | -5.418953389 | 0.521216037  | -1.976630142 |
| H | -3.453986250 | 1.884904135  | -1.534535111 |
| C | -1.360205096 | 1.331558096  | 0.054482005  |

|   |              |              |              |
|---|--------------|--------------|--------------|
| O | -1.716467123 | 2.597013186  | 0.417219028  |
| H | 1.986242144  | -1.691636120 | -0.685986052 |
| H | 3.165554226  | 2.301240167  | 0.363407025  |
| O | 4.077776295  | -0.008263002 | -0.147233012 |
| C | 4.530849325  | -1.296409096 | -0.455915035 |
| H | 5.607254403  | -1.256315092 | -0.390325028 |
| H | 4.246151304  | -1.588201114 | -1.461359105 |
| H | 4.158894299  | -2.029186148 | 0.252274019  |
| H | -0.306507025 | -1.048122078 | -0.599801044 |
| O | 0.851095063  | 3.267980235  | 0.539068037  |
| H | -0.054960005 | 3.507964250  | 0.402641031  |
| C | 3.473332250  | 5.634892405  | 1.707413122  |
| O | 2.319995167  | 5.865484423  | 0.958835070  |
| H | 1.929006137  | 5.032353361  | 0.728481054  |
| H | 3.281580238  | 4.997725362  | 2.567991185  |
| H | 3.828997275  | 6.591807476  | 2.066253147  |
| H | 4.264935307  | 5.180040370  | 1.113842082  |
| C | -4.220109306 | 5.551273398  | -0.281189021 |
| O | -4.534931324 | 4.190076301  | -0.196550014 |
| H | -3.933427283 | 3.761817270  | 0.396380028  |
| H | -4.954084358 | 6.010905432  | -0.928071065 |
| H | -3.233600235 | 5.716496410  | -0.708268049 |
| H | -4.264187305 | 6.040742435  | 0.688247052  |

Coord\_10

|   |              |              |              |
|---|--------------|--------------|--------------|
| C | -2.683791195 | -0.781605058 | 0.403071030  |
| C | -3.813570276 | -1.559124110 | 0.145827010  |
| C | -4.799407345 | -1.092733080 | -0.716119050 |
| C | -4.656507337 | 0.153805013  | -1.316550095 |
| C | -3.541633253 | 0.920594065  | -1.072640077 |
| C | -2.526750184 | 0.460127032  | -0.218244017 |
| C | 0.006216002  | 1.014620073  | -0.006567000 |
| C | 0.439881033  | -0.321357024 | -0.350373024 |
| C | 1.077987080  | 1.961067140  | 0.239376017  |
| C | 1.740970125  | -0.683515048 | -0.409317030 |
| C | 2.396794174  | 1.576610116  | 0.179299011  |
| C | 2.759468199  | 0.257549017  | -0.129850011 |
| H | -1.941982140 | -1.132823083 | 1.096505077  |
| H | -3.925580282 | -2.513477181 | 0.627143045  |
| H | -5.672494406 | -1.687855123 | -0.907175067 |
| H | -5.419065389 | 0.523036036  | -1.977303145 |
| H | -3.453813251 | 1.886357134  | -1.535305112 |
| C | -1.359963098 | 1.332242095  | 0.054079004  |
| O | -1.716509123 | 2.597789187  | 0.416860029  |
| H | 1.986957142  | -1.690733122 | -0.685388050 |
| H | 3.165684229  | 2.302097165  | 0.363591025  |
| O | 4.078188291  | -0.007246003 | -0.146634010 |

|   |              |              |              |
|---|--------------|--------------|--------------|
| C | 4.531317324  | -1.295421095 | -0.455058032 |
| H | 5.607715401  | -1.255300088 | -0.389331027 |
| H | 4.246685307  | -1.587366115 | -1.460483105 |
| H | 4.159207302  | -2.028082147 | 0.253178018  |
| H | -0.306044021 | -1.047181074 | -0.599667045 |
| O | 0.851085062  | 3.268732233  | 0.538732036  |
| H | -0.054729003 | 3.509170250  | 0.401868030  |
| C | 3.473057253  | 5.636176406  | 1.707037120  |
| O | 2.319832170  | 5.866365424  | 0.958157067  |
| H | 1.929108136  | 5.033091362  | 0.727859054  |
| H | 3.281224234  | 4.999150362  | 2.567700185  |
| H | 3.828409274  | 6.593256475  | 2.065742147  |
| H | 4.264870309  | 5.181371373  | 1.113714080  |
| C | -4.220039301 | 5.553875400  | -0.283279022 |
| O | -4.535386327 | 4.192818302  | -0.198099017 |
| H | -3.934820283 | 3.764874269  | 0.395989029  |
| H | -4.953225355 | 6.013264430  | -0.931204069 |
| H | -3.233064231 | 5.718484413  | -0.709478050 |
| H | -4.264957305 | 6.043962436  | 0.685794050  |

LIIC path connecting T<sub>2</sub>/T<sub>1</sub>-ENOL and T1-PP-ENOL

Coord\_1

|   |              |              |              |
|---|--------------|--------------|--------------|
| C | -2.683791195 | -0.781605058 | 0.403071030  |
| C | -3.813570276 | -1.559124110 | 0.145827010  |
| C | -4.799407345 | -1.092733080 | -0.716119050 |
| C | -4.656507337 | 0.153805013  | -1.316550095 |
| C | -3.541633253 | 0.920594065  | -1.072640077 |
| C | -2.526750184 | 0.460127032  | -0.218244017 |
| C | 0.006216002  | 1.014620073  | -0.006567000 |
| C | 0.439881033  | -0.321357024 | -0.350373024 |
| C | 1.077987080  | 1.961067140  | 0.239376017  |
| C | 1.740970125  | -0.683515048 | -0.409317030 |
| C | 2.396794174  | 1.576610116  | 0.179299011  |
| C | 2.759468199  | 0.257549017  | -0.129850011 |
| H | -1.941982140 | -1.132823083 | 1.096505077  |
| H | -3.925580282 | -2.513477181 | 0.627143045  |
| H | -5.672494406 | -1.687855123 | -0.907175067 |
| H | -5.419065389 | 0.523036036  | -1.977303145 |
| H | -3.453813251 | 1.886357134  | -1.535305112 |
| C | -1.359963098 | 1.332242095  | 0.054079004  |
| O | -1.716509123 | 2.597789187  | 0.416860029  |
| H | 1.986957142  | -1.690733122 | -0.685388050 |
| H | 3.165684229  | 2.302097165  | 0.363591025  |
| O | 4.078188291  | -0.007246003 | -0.146634010 |
| C | 4.531317324  | -1.295421095 | -0.455058032 |
| H | 5.607715401  | -1.255300088 | -0.389331027 |
| H | 4.246685307  | -1.587366115 | -1.460483105 |

|   |              |              |              |
|---|--------------|--------------|--------------|
| H | 4.159207302  | -2.028082147 | 0.253178018  |
| H | -0.306044021 | -1.047181074 | -0.599667045 |
| O | 0.851085062  | 3.268732233  | 0.538732036  |
| H | -0.054729003 | 3.509170250  | 0.401868030  |
| C | 3.473057253  | 5.636176406  | 1.707037120  |
| O | 2.319832170  | 5.866365424  | 0.958157067  |
| H | 1.929108136  | 5.033091362  | 0.727859054  |
| H | 3.281224234  | 4.999150362  | 2.567700185  |
| H | 3.828409274  | 6.593256475  | 2.065742147  |
| H | 4.264870309  | 5.181371373  | 1.113714080  |
| C | -4.220039301 | 5.553875400  | -0.283279022 |
| O | -4.535386327 | 4.192818302  | -0.198099017 |
| H | -3.934820283 | 3.764874269  | 0.395989029  |
| H | -4.953225355 | 6.013264430  | -0.931204069 |
| H | -3.233064231 | 5.718484413  | -0.709478050 |
| H | -4.264957305 | 6.043962436  | 0.685794050  |

Coord\_2

|   |              |              |              |
|---|--------------|--------------|--------------|
| C | -2.672117191 | -0.774895058 | 0.402589029  |
| C | -3.797891273 | -1.559549113 | 0.149385012  |
| C | -4.789903343 | -1.099155080 | -0.708607051 |
| C | -4.658226337 | 0.148991013  | -1.308522095 |
| C | -3.548939254 | 0.924360066  | -1.066122079 |
| C | -2.528445181 | 0.469473032  | -0.216158016 |
| C | 0.003598998  | 1.024125075  | -0.009402003 |
| C | 0.431095029  | -0.316665021 | -0.372405028 |
| C | 1.072345077  | 1.964342139  | 0.234199018  |
| C | 1.745023125  | -0.689456047 | -0.409222027 |
| C | 2.394529174  | 1.576792116  | 0.168823010  |
| C | 2.755138201  | 0.246264015  | -0.132144010 |
| H | -1.923595136 | -1.123173081 | 1.090279079  |
| H | -3.901656280 | -2.515385182 | 0.629492047  |
| H | -5.659120409 | -1.700646120 | -0.897551063 |
| H | -5.425555388 | 0.512921035  | -1.966682139 |
| H | -3.469738248 | 1.891975134  | -1.526181112 |
| C | -1.367245101 | 1.352353095  | 0.054307006  |
| O | -1.716122125 | 2.608108186  | 0.400716027  |
| H | 1.988593141  | -1.700852123 | -0.671774050 |
| H | 3.166243226  | 2.300317166  | 0.347465026  |
| O | 4.074510292  | -0.012151000 | -0.134686008 |
| C | 4.533459328  | -1.300731093 | -0.433455033 |
| H | 5.609327402  | -1.257564088 | -0.361424023 |
| H | 4.254736305  | -1.598184117 | -1.438864103 |
| H | 4.158236299  | -2.030126147 | 0.276401020  |
| H | -0.315015025 | -1.009236075 | -0.704045051 |
| O | 0.852576061  | 3.270296237  | 0.541023040  |
| H | -0.056745005 | 3.508547255  | 0.420192030  |

|   |              |             |              |
|---|--------------|-------------|--------------|
| C | 3.481160253  | 5.622762403 | 1.707696121  |
| O | 2.331679168  | 5.864357424 | 0.956645070  |
| H | 1.934307139  | 5.034887363 | 0.724207053  |
| H | 3.281926236  | 4.985730358 | 2.566673184  |
| H | 3.843977277  | 6.576011472 | 2.069072148  |
| H | 4.270430305  | 5.162346371 | 1.115261082  |
| C | -4.242711308 | 5.559447398 | -0.280137022 |
| O | -4.533761324 | 4.192455302 | -0.201027013 |
| H | -3.904485282 | 3.770141271 | 0.366010027  |
| H | -5.004733362 | 6.015010435 | -0.896849067 |
| H | -3.273564235 | 5.745053413 | -0.737612055 |
| H | -4.262000305 | 6.037393436 | 0.695890049  |

Coord\_3

|   |              |              |              |
|---|--------------|--------------|--------------|
| C | -2.660321190 | -0.768233055 | 0.401404031  |
| C | -3.781929271 | -1.560170113 | 0.152318009  |
| C | -4.780287346 | -1.105884082 | -0.701472048 |
| C | -4.660164338 | 0.143888009  | -1.300684091 |
| C | -3.556630258 | 0.927947068  | -1.059849074 |
| C | -2.530350182 | 0.478747033  | -0.214569013 |
| C | 0.000508000  | 1.033837076  | -0.012875999 |
| C | 0.421920032  | -0.311364025 | -0.395220029 |
| C | 1.066166075  | 1.967898141  | 0.228370019  |
| C | 1.748112128  | -0.695245050 | -0.409134030 |
| C | 2.391674173  | 1.577047116  | 0.157769011  |
| C | 2.750028195  | 0.234954016  | -0.134517010 |
| H | -1.904955137 | -1.113453079 | 1.083138081  |
| H | -3.877193278 | -2.517506183 | 0.631081044  |
| H | -5.645506404 | -1.713843123 | -0.888254064 |
| H | -5.432390390 | 0.502433038  | -1.956061139 |
| H | -3.486300252 | 1.897416134  | -1.517152110 |
| C | -1.374961098 | 1.372542096  | 0.053971005  |
| O | -1.716444124 | 2.618119188  | 0.384615026  |
| H | 1.988665141  | -1.710807122 | -0.657970048 |
| H | 3.166263229  | 2.298509163  | 0.330697024  |
| O | 4.069829291  | -0.017259000 | -0.122462008 |
| C | 4.534338328  | -1.306370095 | -0.410994030 |
| H | 5.609621402  | -1.260323091 | -0.332439022 |
| H | 4.261711306  | -1.609596115 | -1.416292101 |
| H | 4.155662301  | -2.032181149 | 0.300592024  |
| H | -0.317917023 | -0.967125071 | -0.807442057 |
| O | 0.853365059  | 3.272041236  | 0.542583039  |
| H | -0.059224004 | 3.507878253  | 0.437806034  |
| C | 3.487717251  | 5.610189405  | 1.707743122  |
| O | 2.342107166  | 5.862872420  | 0.954428071  |
| H | 1.938224141  | 5.037182363  | 0.719946049  |
| H | 3.281111234  | 4.973347357  | 2.565119186  |

|   |              |             |              |
|---|--------------|-------------|--------------|
| H | 3.857807277  | 6.559653471 | 2.071652152  |
| H | 4.274499308  | 5.144179372 | 1.116322082  |
| C | -4.261591304 | 5.563894402 | -0.275455020 |
| O | -4.530949324 | 4.192070304 | -0.202427014 |
| H | -3.875141277 | 3.774351273 | 0.336765025  |
| H | -5.050523366 | 6.015869432 | -0.860258064 |
| H | -3.311335240 | 5.768542416 | -0.763530056 |
| H | -4.253895305 | 6.030642436 | 0.706196051  |

Coord\_4

|   |              |              |              |
|---|--------------|--------------|--------------|
| C | -2.648370192 | -0.761663055 | 0.399550027  |
| C | -3.765656271 | -1.561010114 | 0.154649014  |
| C | -4.770525343 | -1.112927082 | -0.694680048 |
| C | -4.662275337 | 0.138487009  | -1.292986092 |
| C | -3.564650257 | 0.931330066  | -1.053758075 |
| C | -2.532418181 | 0.487907033  | -0.213424016 |
| C | -0.003003002 | 1.043683075  | -0.016941001 |
| C | 0.412397027  | -0.305493020 | -0.418843031 |
| C | 1.059479074  | 1.971695141  | 0.221905018  |
| C | 1.750243125  | -0.700922048 | -0.409100031 |
| C | 2.388256174  | 1.577331115  | 0.146111009  |
| C | 2.744146200  | 0.223579018  | -0.137008012 |
| H | -1.886033135 | -1.103714080 | 1.075105080  |
| H | -3.852171275 | -2.519864181 | 0.631917044  |
| H | -5.631622407 | -1.727439126 | -0.879257062 |
| H | -5.439517391 | 0.491578036  | -1.945381141 |
| H | -3.503436249 | 1.902653137  | -1.508139110 |
| C | -1.383059097 | 1.392745100  | 0.053135005  |
| O | -1.717406121 | 2.627779191  | 0.368630026  |
| H | 1.987162146  | -1.720616126 | -0.644077045 |
| H | 3.165776227  | 2.296625165  | 0.313252024  |
| O | 4.064150293  | -0.022594001 | -0.110031010 |
| C | 4.533950325  | -1.312350095 | -0.387763027 |
| H | 5.608590401  | -1.263583093 | -0.302481023 |
| H | 4.267589306  | -1.621603115 | -1.392848099 |
| H | 4.151493300  | -2.034268144 | 0.325650022  |
| H | -0.314695021 | -0.921035066 | -0.909568065 |
| O | 0.853441060  | 3.273916233  | 0.543461039  |
| H | -0.062189006 | 3.507077254  | 0.454783035  |
| C | 3.492684252  | 5.598474405  | 1.707211125  |
| O | 2.351034169  | 5.861907423  | 0.951575070  |
| H | 1.940793137  | 5.039961363  | 0.715139051  |
| H | 3.278780235  | 4.961990356  | 2.563063184  |
| H | 3.869841281  | 6.544207470  | 2.073525148  |
| H | 4.277027309  | 5.126920368  | 1.116895080  |
| C | -4.276791307 | 5.567427401  | -0.269371022 |
| O | -4.526918327 | 4.191712300  | -0.202348014 |

|   |              |             |              |
|---|--------------|-------------|--------------|
| H | -3.846704276 | 3.777519272 | 0.308340020  |
| H | -5.090703366 | 6.016096433 | -0.821705062 |
| H | -3.346350242 | 5.789295414 | -0.787283055 |
| H | -4.241019306 | 6.023874434 | 0.716550049  |

Coord\_5

|   |              |              |              |
|---|--------------|--------------|--------------|
| C | -2.636233189 | -0.755214057 | 0.397055030  |
| C | -3.749045270 | -1.562086111 | 0.156401014  |
| C | -4.760583341 | -1.120288080 | -0.688204051 |
| C | -4.664510338 | 0.132781007  | -1.285383095 |
| C | -3.572949259 | 0.934482068  | -1.047798073 |
| C | -2.534606180 | 0.496914037  | -0.212678014 |
| C | -0.006886998 | 1.053597078  | -0.021549002 |
| C | 0.402564030  | -0.299082022 | -0.443290030 |
| C | 1.052309077  | 1.975694144  | 0.214824013  |
| C | 1.751417126  | -0.706519050 | -0.409160029 |
| C | 2.384298172  | 1.577606112  | 0.133825010  |
| C | 2.737500199  | 0.212109016  | -0.139657009 |
| H | -1.866809136 | -1.093995078 | 1.066203075  |
| H | -3.826577273 | -2.522473183 | 0.632013047  |
| H | -5.617438403 | -1.741425127 | -0.870540062 |
| H | -5.446883391 | 0.480358034  | -1.934593138 |
| H | -3.521082252 | 1.907658138  | -1.499079108 |
| C | -1.391492098 | 1.412906102  | 0.051859005  |
| O | -1.718942122 | 2.637056192  | 0.352816024  |
| H | 1.984072142  | -1.730292127 | -0.630180046 |
| H | 3.164807229  | 2.294621165  | 0.295090020  |
| O | 4.057473293  | -0.028174000 | -0.097459008 |
| C | 4.532283327  | -1.318676096 | -0.363849026 |
| H | 5.606224402  | -1.267344094 | -0.271653019 |
| H | 4.272342307  | -1.634202116 | -1.368607097 |
| H | 4.145728300  | -2.036397146 | 0.351480026  |
| H | -0.305251022 | -0.871146060 | -1.010087072 |
| O | 0.852799062  | 3.275876237  | 0.543702037  |
| H | -0.065649005 | 3.506068250  | 0.471188032  |
| C | 3.496033250  | 5.587622403  | 1.706130121  |
| O | 2.358397168  | 5.861455421  | 0.948150071  |
| H | 1.941963138  | 5.043211364  | 0.709846051  |
| H | 3.274947234  | 4.951640358  | 2.560530182  |
| H | 3.880042278  | 6.529684470  | 2.074727148  |
| H | 4.277984310  | 5.110603367  | 1.116981082  |
| C | -4.288437307 | 5.570225400  | -0.262008018 |
| O | -4.521643324 | 4.191423300  | -0.200853014 |
| H | -3.819099273 | 3.779669271  | 0.280793021  |
| H | -5.125409371 | 6.015911433  | -0.781440055 |
| H | -3.378606242 | 5.807630416  | -0.808923060 |
| H | -4.223732302 | 6.017198434  | 0.726831053  |



## Coord\_6

|   |              |              |              |
|---|--------------|--------------|--------------|
| C | -2.623889188 | -0.748909053 | 0.393950030  |
| C | -3.732079271 | -1.563409112 | 0.157597012  |
| C | -4.750432340 | -1.127971083 | -0.682017048 |
| C | -4.666829336 | 0.126759007  | -1.277841092 |
| C | -3.581479257 | 0.937382065  | -1.041927074 |
| C | -2.536877182 | 0.505739036  | -0.212290016 |
| C | -0.011103001 | 1.063526078  | -0.026662003 |
| C | 0.392456030  | -0.292152023 | -0.468572034 |
| C | 1.044679076  | 1.979865141  | 0.207145016  |
| C | 1.751634126  | -0.712059049 | -0.409354031 |
| C | 2.379819173  | 1.577839114  | 0.120886007  |
| C | 2.730090199  | 0.200522013  | -0.142507010 |
| H | -1.847270134 | -1.084322078 | 1.056460075  |
| H | -3.800400271 | -2.525338181 | 0.631385046  |
| H | -5.602926405 | -1.755796126 | -0.862081064 |
| H | -5.454437391 | 0.468767036  | -1.923663141 |
| H | -3.539180257 | 1.912400137  | -1.489923109 |
| C | -1.400217098 | 1.432980102  | 0.050191002  |
| O | -1.720996123 | 2.645927193  | 0.337211026  |
| H | 1.979380144  | -1.739845126 | -0.616351046 |
| H | 3.163378228  | 2.292464165  | 0.276173018  |
| O | 4.049796291  | -0.034006004 | -0.084821006 |
| C | 4.529326327  | -1.325349096 | -0.339340023 |
| H | 5.602507403  | -1.271598091 | -0.240061016 |
| H | 4.275940310  | -1.647386118 | -1.343650098 |
| H | 4.138367296  | -2.038571149 | 0.377985028  |
| H | -0.289455023 | -0.817639059 | -1.108601079 |
| O | 0.851437060  | 3.277883237  | 0.543352040  |
| H | -0.069612002 | 3.504786255  | 0.487086036  |
| C | 3.497757252  | 5.577627399  | 1.704528122  |
| O | 2.364159168  | 5.861507423  | 0.944216067  |
| H | 1.941698142  | 5.046915361  | 0.704128052  |
| H | 3.269640237  | 4.942270354  | 2.557546184  |
| H | 3.888403279  | 6.516084466  | 2.075294150  |
| H | 4.277355309  | 5.095241367  | 1.116581083  |
| C | -4.296659309 | 5.572445399  | -0.253478019 |
| O | -4.515111324 | 4.191239300  | -0.198020016 |
| H | -3.792258271 | 3.780827270  | 0.254154016  |
| H | -5.154793372 | 6.015516434  | -0.739687054 |
| H | -3.408121246 | 5.823838417  | -0.828503058 |
| H | -4.202375301 | 6.010686432  | 0.736942053  |

## Coord\_7

|   |              |              |             |
|---|--------------|--------------|-------------|
| C | -2.611323186 | -0.742762056 | 0.390265030 |
| C | -3.714742266 | -1.564981113 | 0.158264014 |

|   |              |              |              |
|---|--------------|--------------|--------------|
| C | -4.740048343 | -1.135979080 | -0.676097047 |
| C | -4.669192334 | 0.120409007  | -1.270337094 |
| C | -3.590200257 | 0.940004070  | -1.036115073 |
| C | -2.539199185 | 0.514356037  | -0.212228017 |
| C | -0.015619000 | 1.073425080  | -0.032241002 |
| C | 0.382103027  | -0.284715019 | -0.494688037 |
| C | 1.036607075  | 1.984182142  | 0.198889015  |
| C | 1.750888123  | -0.717557052 | -0.409716030 |
| C | 2.374830170  | 1.578010113  | 0.107268007  |
| C | 2.721917194  | 0.188806013  | -0.145606009 |
| H | -1.827410133 | -1.074707075 | 1.045908074  |
| H | -3.773637270 | -2.528454183 | 0.630059044  |
| H | -5.588064404 | -1.770546127 | -0.853863063 |
| H | -5.462133395 | 0.456795035  | -1.912570135 |
| H | -3.557677256 | 1.916848137  | -1.480641107 |
| C | -1.409202099 | 1.452926105  | 0.048172005  |
| O | -1.723523124 | 2.654377190  | 0.321838025  |
| H | 1.973065144  | -1.749275128 | -0.602650044 |
| H | 3.161502226  | 2.290128165  | 0.256460017  |
| O | 4.041115292  | -0.040089003 | -0.072194006 |
| C | 4.525063328  | -1.332353095 | -0.314334022 |
| H | 5.597425401  | -1.276326094 | -0.207823014 |
| H | 4.278345310  | -1.661137122 | -1.318060097 |
| H | 4.129410299  | -2.040778146 | 0.405063027  |
| H | -0.267154018 | -0.760723057 | -1.204650089 |
| O | 0.849358060  | 3.279906234  | 0.542456037  |
| H | -0.074077004 | 3.503175254  | 0.502541038  |
| C | 3.497865251  | 5.568473400  | 1.702438120  |
| O | 2.368298170  | 5.862050423  | 0.939836067  |
| H | 1.939976141  | 5.051056364  | 0.698046049  |
| H | 3.262897233  | 4.933845354  | 2.554137181  |
| H | 3.894936279  | 6.503395468  | 2.075260151  |
| H | 4.275140305  | 5.080835363  | 1.115699082  |
| C | -4.301584309 | 5.574217402  | -0.243888020 |
| O | -4.507318326 | 4.191191304  | -0.193946012 |
| H | -3.766123270 | 3.781026272  | 0.228424016  |
| H | -5.179016370 | 6.015086435  | -0.696650048 |
| H | -3.434917247 | 5.838182423  | -0.846081061 |
| H | -4.177262300 | 6.004367431  | 0.746812056  |

Coord\_8

|   |              |              |              |
|---|--------------|--------------|--------------|
| C | -2.598527188 | -0.736780051 | 0.386033030  |
| C | -3.697030264 | -1.566804112 | 0.158431012  |
| C | -4.729410340 | -1.144315082 | -0.670423050 |
| C | -4.671567335 | 0.113715010  | -1.262853093 |
| C | -3.599076258 | 0.942323067  | -1.030341072 |
| C | -2.541551182 | 0.522744036  | -0.212461014 |

|   |              |              |              |
|---|--------------|--------------|--------------|
| C | -0.020408001 | 1.083256076  | -0.038254001 |
| C | 0.371532029  | -0.276779021 | -0.521633039 |
| C | 1.028104075  | 1.988623146  | 0.190081013  |
| C | 1.749174124  | -0.723018050 | -0.410282027 |
| C | 2.369341173  | 1.578102115  | 0.092946004  |
| C | 2.712978194  | 0.176960015  | -0.149005010 |
| H | -1.807234128 | -1.065151076 | 1.034583073  |
| H | -3.746294268 | -2.531813183 | 0.628067046  |
| H | -5.572834402 | -1.785672129 | -0.845867062 |
| H | -5.469929393 | 0.444423030  | -1.901303137 |
| H | -3.576527259 | 1.920968136  | -1.471214106 |
| C | -1.418424103 | 1.472714106  | 0.045838005  |
| O | -1.726486125 | 2.662398189  | 0.306705022  |
| H | 1.965108144  | -1.758578127 | -0.589125041 |
| H | 3.159185229  | 2.287600163  | 0.235912017  |
| O | 4.031425289  | -0.046408003 | -0.059667005 |
| C | 4.519481328  | -1.339665097 | -0.288931021 |
| H | 5.590963401  | -1.281492092 | -0.175065010 |
| H | 4.279522306  | -1.675427120 | -1.291929092 |
| H | 4.118862294  | -2.042994145 | 0.432606031  |
| H | -0.238178018 | -0.700638049 | -1.297701093 |
| O | 0.846561062  | 3.281919235  | 0.541062041  |
| H | -0.079040004 | 3.501189252  | 0.517617039  |
| C | 3.496379253  | 5.560138398  | 1.699890121  |
| O | 2.370806168  | 5.863067422  | 0.935072069  |
| H | 1.936783138  | 5.055617363  | 0.691664050  |
| H | 3.254763234  | 4.926325354  | 2.550336186  |
| H | 3.899672283  | 6.491592466  | 2.074658148  |
| H | 4.271350306  | 5.067369364  | 1.114341081  |
| C | -4.303333308 | 5.575652403  | -0.233338014 |
| O | -4.498267326 | 4.191305299  | -0.188738014 |
| H | -3.740645270 | 3.780299273  | 0.203580012  |
| H | -5.198231373 | 6.014781433  | -0.652510045 |
| H | -3.459014248 | 5.850899420  | -0.861717064 |
| H | -4.148665297 | 5.998242432  | 0.756390053  |

Coord\_9

|   |              |              |              |
|---|--------------|--------------|--------------|
| C | -2.585504184 | -0.730963054 | 0.381287025  |
| C | -3.678944266 | -1.568870116 | 0.158130010  |
| C | -4.718506341 | -1.152983085 | -0.664974048 |
| C | -4.673925338 | 0.106660008  | -1.255381089 |
| C | -3.608077262 | 0.944315070  | -1.024593074 |
| C | -2.543918181 | 0.530886036  | -0.212967013 |
| C | -0.025457003 | 1.092988080  | -0.044670005 |
| C | 0.360762028  | -0.268348021 | -0.549389042 |
| C | 1.019174072  | 1.993169143  | 0.180748014  |
| C | 1.746486125  | -0.728439053 | -0.411085028 |

|   |              |              |              |
|---|--------------|--------------|--------------|
| C | 2.363350172  | 1.578109111  | 0.077892007  |
| C | 2.703270194  | 0.164992010  | -0.152762010 |
| H | -1.786759128 | -1.055647074 | 1.022528071  |
| H | -3.718384270 | -2.535397184 | 0.625451043  |
| H | -5.557223398 | -1.801172128 | -0.838075059 |
| H | -5.477784394 | 0.431626032  | -1.889863134 |
| H | -3.595687259 | 1.924721141  | -1.461640104 |
| C | -1.427866101 | 1.492318107  | 0.043216001  |
| O | -1.729858122 | 2.669986194  | 0.291806020  |
| H | 1.955492141  | -1.767740128 | -0.575816042 |
| H | 3.156422225  | 2.284874165  | 0.214488017  |
| O | 4.020722288  | -0.052934002 | -0.047336006 |
| C | 4.512570326  | -1.347241095 | -0.263248017 |
| H | 5.583113400  | -1.287044092 | -0.141926010 |
| H | 4.279434309  | -1.690212120 | -1.265357091 |
| H | 4.106736298  | -2.045180150 | 0.460500033  |
| H | -0.202351014 | -0.637677048 | -1.387151098 |
| O | 0.843045060  | 3.283897236  | 0.539221038  |
| H | -0.084497007 | 3.498784252  | 0.532383037  |
| C | 3.493324249  | 5.552590399  | 1.696917124  |
| O | 2.371681168  | 5.864541424  | 0.929991068  |
| H | 1.932109138  | 5.060579363  | 0.685049048  |
| H | 3.245287236  | 4.919664351  | 2.546176181  |
| H | 3.902650281  | 6.480648467  | 2.073521147  |
| H | 4.265998308  | 5.054820364  | 1.112514080  |
| C | -4.302003311 | 5.576844402  | -0.221920015 |
| O | -4.487968325 | 4.191604300  | -0.182519012 |
| H | -3.715787269 | 3.778684271  | 0.179573013  |
| H | -5.212573373 | 6.014749434  | -0.607432044 |
| H | -3.480417251 | 5.862202424  | -0.875470063 |
| H | -4.116815299 | 5.992282431  | 0.765638055  |

Coord\_10

|   |              |              |              |
|---|--------------|--------------|--------------|
| C | -2.578486188 | -0.735807053 | 0.390876029  |
| C | -3.664826262 | -1.583054114 | 0.168210011  |
| C | -4.704628340 | -1.179017087 | -0.660382049 |
| C | -4.668483337 | 0.078489004  | -1.256158091 |
| C | -3.611395261 | 0.926666067  | -1.023365076 |
| C | -2.547440184 | 0.524556039  | -0.206564016 |
| C | -0.033370002 | 1.089458076  | -0.026326002 |
| C | 0.351649024  | -0.275816019 | -0.541001037 |
| C | 1.005283074  | 1.986073141  | 0.199334016  |
| C | 1.743178127  | -0.749114056 | -0.360360028 |
| C | 2.353191170  | 1.565669112  | 0.104642007  |
| C | 2.690949196  | 0.139226010  | -0.102580010 |
| H | -1.777685130 | -1.052686078 | 1.033468075  |
| H | -3.698261268 | -2.548139185 | 0.638848048  |

|   |              |              |              |
|---|--------------|--------------|--------------|
| H | -5.537050399 | -1.835154134 | -0.834141060 |
| H | -5.472475392 | 0.393670026  | -1.895383136 |
| H | -3.605607258 | 1.906053138  | -1.462526105 |
| C | -1.440857101 | 1.499104107  | 0.050867004  |
| O | -1.738941127 | 2.665981190  | 0.277831021  |
| H | 1.945814140  | -1.792959128 | -0.502702035 |
| H | 3.148413228  | 2.270417164  | 0.237104015  |
| O | 4.006073291  | -0.072519006 | 0.031629004  |
| C | 4.503075325  | -1.369144101 | -0.158121009 |
| H | 5.571480402  | -1.306192096 | -0.020529003 |
| H | 4.285357311  | -1.725813123 | -1.158858085 |
| H | 4.085593296  | -2.056856149 | 0.568679039  |
| H | -0.150002012 | -0.594185044 | -1.437738104 |
| O | 0.831180060  | 3.276348236  | 0.555861038  |
| H | -0.098118008 | 3.486479251  | 0.556524039  |
| C | 3.471170249  | 5.543593401  | 1.720880122  |
| O | 2.359988171  | 5.859396424  | 0.940463068  |
| H | 1.917111138  | 5.057327363  | 0.695296052  |
| H | 3.209706231  | 4.916922356  | 2.570750182  |
| H | 3.883127281  | 6.470683466  | 2.096949152  |
| H | 4.246486305  | 5.037338364  | 1.147316083  |
| C | -4.298659308 | 5.563532403  | -0.249057018 |
| O | -4.477743324 | 4.178010303  | -0.207614015 |
| H | -3.695704267 | 3.764223270  | 0.133435012  |
| H | -5.220090378 | 5.998552430  | -0.611517044 |
| H | -3.494331252 | 5.853720421  | -0.921711068 |
| H | -4.091298292 | 5.978250428  | 0.734430054  |

LIIC path connecting T1-PP-ENOL and S0-ENOL

Coord\_1

|   |              |              |              |
|---|--------------|--------------|--------------|
| C | -2.578486188 | -0.735807053 | 0.390876029  |
| C | -3.664826262 | -1.583054114 | 0.168210011  |
| C | -4.704628340 | -1.179017087 | -0.660382049 |
| C | -4.668483337 | 0.078489004  | -1.256158091 |
| C | -3.611395261 | 0.926666067  | -1.023365076 |
| C | -2.547440184 | 0.524556039  | -0.206564016 |
| C | -0.033370002 | 1.089458076  | -0.026326002 |
| C | 0.351649024  | -0.275816019 | -0.541001037 |
| C | 1.005283074  | 1.986073141  | 0.199334016  |
| C | 1.743178127  | -0.749114056 | -0.360360028 |
| C | 2.353191170  | 1.565669112  | 0.104642007  |
| C | 2.690949196  | 0.139226010  | -0.102580010 |
| H | -1.777685130 | -1.052686078 | 1.033468075  |
| H | -3.698261268 | -2.548139185 | 0.638848048  |
| H | -5.537050399 | -1.835154134 | -0.834141060 |
| H | -5.472475392 | 0.393670026  | -1.895383136 |
| H | -3.605607258 | 1.906053138  | -1.462526105 |

|   |              |              |              |
|---|--------------|--------------|--------------|
| C | -1.440857101 | 1.499104107  | 0.050867004  |
| O | -1.738941127 | 2.665981190  | 0.277831021  |
| H | 1.945814140  | -1.792959128 | -0.502702035 |
| H | 3.148413228  | 2.270417164  | 0.237104015  |
| O | 4.006073291  | -0.072519006 | 0.031629004  |
| C | 4.503075325  | -1.369144101 | -0.158121009 |
| H | 5.571480402  | -1.306192096 | -0.020529003 |
| H | 4.285357311  | -1.725813123 | -1.158858085 |
| H | 4.085593296  | -2.056856149 | 0.568679039  |
| H | -0.150002012 | -0.594185044 | -1.437738104 |
| O | 0.831180060  | 3.276348236  | 0.555861038  |
| H | -0.098118008 | 3.486479251  | 0.556524039  |
| C | 3.471170249  | 5.543593401  | 1.720880122  |
| O | 2.359988171  | 5.859396424  | 0.940463068  |
| H | 1.917111138  | 5.057327363  | 0.695296052  |
| H | 3.209706231  | 4.916922356  | 2.570750182  |
| H | 3.883127281  | 6.470683466  | 2.096949152  |
| H | 4.246486305  | 5.037338364  | 1.147316083  |
| C | -4.298659308 | 5.563532403  | -0.249057018 |
| O | -4.477743324 | 4.178010303  | -0.207614015 |
| H | -3.695704267 | 3.764223270  | 0.133435012  |
| H | -5.220090378 | 5.998552430  | -0.611517044 |
| H | -3.494331252 | 5.853720421  | -0.921711068 |
| H | -4.091298292 | 5.978250428  | 0.734430054  |

Coord\_2

|   |              |              |              |
|---|--------------|--------------|--------------|
| C | -2.577807184 | -0.745095055 | 0.388756028  |
| C | -3.664977262 | -1.591486114 | 0.166937012  |
| C | -4.710644339 | -1.181748086 | -0.651598045 |
| C | -4.679380335 | 0.080648004  | -1.237927088 |
| C | -3.621862260 | 0.928025069  | -1.005221070 |
| C | -2.552322183 | 0.520135039  | -0.198437013 |
| C | -0.037364004 | 1.082277077  | -0.040521002 |
| C | 0.358406025  | -0.269389019 | -0.588281040 |
| C | 1.002900072  | 1.979082143  | 0.182094014  |
| C | 1.742056123  | -0.760889054 | -0.367551028 |
| C | 2.348237171  | 1.557546114  | 0.085569004  |
| C | 2.686857196  | 0.130456009  | -0.106679006 |
| H | -1.771864128 | -1.066149078 | 1.023079072  |
| H | -3.694838263 | -2.560207183 | 0.630233043  |
| H | -5.543633402 | -1.837201134 | -0.825128061 |
| H | -5.487761396 | 0.399788030  | -1.869611135 |
| H | -3.619737259 | 1.910845139  | -1.436716104 |
| C | -1.443107105 | 1.491483108  | 0.058194003  |
| O | -1.734498123 | 2.657434189  | 0.296513020  |
| H | 1.942582137  | -1.806997131 | -0.493660036 |
| H | 3.143830225  | 2.261914164  | 0.220385015  |

|   |              |              |              |
|---|--------------|--------------|--------------|
| O | 4.001269288  | -0.076034008 | 0.044162006  |
| C | 4.505255323  | -1.370752096 | -0.139696010 |
| H | 5.572174402  | -1.303303095 | 0.007255999  |
| H | 4.297408312  | -1.729342127 | -1.141881084 |
| H | 4.084544292  | -2.059687147 | 0.584044040  |
| H | -0.084206007 | -0.525658040 | -1.532243112 |
| O | 0.831420057  | 3.268847234  | 0.541960039  |
| H | -0.098254007 | 3.477257248  | 0.553370042  |
| C | 3.447372248  | 5.550879399  | 1.723979122  |
| O | 2.353082170  | 5.855865420  | 0.915820066  |
| H | 1.915258139  | 5.050504363  | 0.672310048  |
| H | 3.167339226  | 4.937782354  | 2.577833183  |
| H | 3.852789280  | 6.483260464  | 2.094081149  |
| H | 4.233622302  | 5.034849363  | 1.174554085  |
| C | -4.277008306 | 5.570550399  | -0.246804020 |
| O | -4.464260322 | 4.186470302  | -0.193251012 |
| H | -3.685411267 | 3.771003269  | 0.153056010  |
| H | -5.194699374 | 6.007400432  | -0.616458046 |
| H | -3.468740251 | 5.849878420  | -0.919327067 |
| H | -4.070657294 | 5.993063433  | 0.733562055  |

Coord\_3

|   |              |              |              |
|---|--------------|--------------|--------------|
| C | -2.574515183 | -0.753817055 | 0.386303027  |
| C | -3.661670264 | -1.600385113 | 0.165145011  |
| C | -4.713417339 | -1.185991087 | -0.643381044 |
| C | -4.688097340 | 0.081270005  | -1.220126089 |
| C | -3.630988260 | 0.928841065  | -0.987318072 |
| C | -2.555646183 | 0.516238040  | -0.190498015 |
| C | -0.040594002 | 1.078102075  | -0.054664005 |
| C | 0.365007024  | -0.258479019 | -0.635360045 |
| C | 1.001804072  | 1.974460140  | 0.165073012  |
| C | 1.737790124  | -0.770767058 | -0.375100027 |
| C | 2.344203168  | 1.549786111  | 0.066448004  |
| C | 2.681660193  | 0.121467007  | -0.111171006 |
| H | -1.763268125 | -1.078231078 | 1.012392072  |
| H | -3.687143264 | -2.572728184 | 0.620997042  |
| H | -5.546324400 | -1.841545135 | -0.816827058 |
| H | -5.501038395 | 0.403567027  | -1.844316134 |
| H | -3.633354260 | 1.915050135  | -1.411050103 |
| C | -1.444759106 | 1.485426108  | 0.065482007  |
| O | -1.730637124 | 2.650044192  | 0.315002023  |
| H | 1.933448141  | -1.819327130 | -0.485618034 |
| H | 3.141209226  | 2.252585161  | 0.203636015  |
| O | 3.994661287  | -0.082951005 | 0.056101007  |
| C | 4.502434322  | -1.376918101 | -0.122116011 |
| H | 5.567955399  | -1.307564094 | 0.034073003  |
| H | 4.303498311  | -1.736717127 | -1.125712084 |

|   |              |              |              |
|---|--------------|--------------|--------------|
| H | 4.076949291  | -2.066209151 | 0.598453044  |
| H | -0.014881999 | -0.449403033 | -1.619909118 |
| O | 0.833510059  | 3.263688237  | 0.528581036  |
| H | -0.096328008 | 3.470759247  | 0.550714038  |
| C | 3.425466247  | 5.559801402  | 1.727893123  |
| O | 2.348804169  | 5.854031419  | 0.892467067  |
| H | 1.915878139  | 5.045553365  | 0.650473046  |
| H | 3.126553223  | 4.960147358  | 2.584897186  |
| H | 3.824634277  | 6.497180466  | 2.092171153  |
| H | 4.222087302  | 5.034353360  | 1.202916086  |
| C | -4.258665308 | 5.576028400  | -0.245055020 |
| O | -4.452694322 | 4.193355300  | -0.179290015 |
| H | -3.676618262 | 3.777097274  | 0.172293011  |
| H | -5.173047373 | 6.013644432  | -0.621911043 |
| H | -3.446824248 | 5.845245420  | -0.917394067 |
| H | -4.053672292 | 6.006620430  | 0.732064055  |

Coord\_4

|   |              |              |              |
|---|--------------|--------------|--------------|
| C | -2.568636183 | -0.761997056 | 0.383408025  |
| C | -3.654949263 | -1.609747116 | 0.162692010  |
| C | -4.713007337 | -1.191703085 | -0.635848047 |
| C | -4.694693338 | 0.080407007  | -1.202815087 |
| C | -3.638815263 | 0.929134065  | -0.969687072 |
| C | -2.557438184 | 0.512845035  | -0.182803011 |
| C | -0.043070001 | 1.076870077  | -0.068805007 |
| C | 0.371553026  | -0.243152019 | -0.682223051 |
| C | 1.001967074  | 1.972163140  | 0.148197009  |
| C | 1.730396126  | -0.778790057 | -0.382985028 |
| C | 2.341048166  | 1.542401109  | 0.047223005  |
| C | 2.675331191  | 0.112274008  | -0.116012010 |
| H | -1.751911124 | -1.088984076 | 1.001275075  |
| H | -3.675222266 | -2.585704186 | 0.610959042  |
| H | -5.545197401 | -1.848120135 | -0.809376057 |
| H | -5.512376399 | 0.405086031  | -1.819537129 |
| H | -3.646498260 | 1.918691139  | -1.385514099 |
| C | -1.445813105 | 1.480888106  | 0.072711007  |
| O | -1.727338122 | 2.643777188  | 0.333340026  |
| H | 1.918425138  | -1.829986131 | -0.478535034 |
| H | 3.140477226  | 2.242465159  | 0.186775015  |
| O | 3.986247284  | -0.093173006 | 0.067559006  |
| C | 4.494704323  | -1.387552098 | -0.105208010 |
| H | 5.558917400  | -1.318813095 | 0.060149006  |
| H | 4.303782310  | -1.747949126 | -1.110180080 |
| H | 4.062898291  | -2.076301148 | 0.612078046  |
| H | 0.058048003  | -0.366076026 | -1.700065120 |
| O | 0.837422060  | 3.260835236  | 0.515593036  |
| H | -0.092371006 | 3.466949251  | 0.548411038  |



|   |              |             |              |
|---|--------------|-------------|--------------|
| C | 3.405447244  | 5.570360403 | 1.732395125  |
| O | 2.347144166  | 5.853880423 | 0.870179063  |
| H | 1.918955141  | 5.042446364 | 0.629590045  |
| H | 3.087365224  | 4.984057359 | 2.591742189  |
| H | 3.798669274  | 6.512463471 | 2.090958152  |
| H | 4.211853305  | 5.035803364 | 1.232176090  |
| C | -4.243606305 | 5.580042400 | -0.243593020 |
| O | -4.443045320 | 4.198723301 | -0.165585012 |
| H | -3.669325263 | 3.782522272 | 0.191261015  |
| H | -5.155111370 | 6.017402432 | -0.627625046 |
| H | -3.428533247 | 5.839930422 | -0.915687068 |
| H | -4.040325289 | 6.018937433 | 0.730173051  |

Coord\_5

|   |              |              |              |
|---|--------------|--------------|--------------|
| C | -2.560157186 | -0.769648054 | 0.379965029  |
| C | -3.644801263 | -1.619566116 | 0.159441010  |
| C | -4.709416341 | -1.198861086 | -0.629116045 |
| C | -4.699186339 | 0.078083003  | -1.186059087 |
| C | -3.645356264 | 0.928909064  | -0.952359067 |
| C | -2.557698184 | 0.509944037  | -0.175404012 |
| C | -0.044793002 | 1.078560078  | -0.082977004 |
| C | 0.378152025  | -0.223422016 | -0.728838053 |
| C | 1.003379073  | 1.972175142  | 0.131405009  |
| C | 1.719858122  | -0.784956057 | -0.391177030 |
| C | 2.338730169  | 1.535408111  | 0.027845000  |
| C | 2.667820192  | 0.102897008  | -0.121162010 |
| H | -1.737769126 | -1.098431081 | 0.989610071  |
| H | -3.659054261 | -2.599134186 | 0.599937042  |
| H | -5.540254398 | -1.856889132 | -0.802922058 |
| H | -5.521801395 | 0.404385030  | -1.795324127 |
| H | -3.659194265 | 1.921776137  | -1.360097096 |
| C | -1.446260101 | 1.477842109  | 0.079871008  |
| O | -1.724586125 | 2.638610190  | 0.351570023  |
| H | 1.897451134  | -1.838941133 | -0.472374035 |
| H | 3.141573226  | 2.231575162  | 0.169723014  |
| O | 3.975970286  | -0.106627009 | 0.078638004  |
| C | 4.482051324  | -1.402575101 | -0.088816009 |
| H | 5.545036399  | -1.336930097 | 0.085680004  |
| H | 4.298295308  | -1.763049125 | -1.095133079 |
| H | 4.042373289  | -2.089835153 | 0.625072046  |
| H | 0.134611008  | -0.276368020 | -1.772053128 |
| O | 0.843161061  | 3.260282235  | 0.502887035  |
| H | -0.086380005 | 3.465825252  | 0.546338039  |
| C | 3.387364242  | 5.582562400  | 1.737271123  |
| O | 2.348143168  | 5.855412423  | 0.848747062  |
| H | 1.924514137  | 5.041176365  | 0.609486046  |
| H | 3.049837217  | 5.009558363  | 2.598180186  |

|   |              |             |              |
|---|--------------|-------------|--------------|
| H | 3.774963271  | 6.529135470 | 2.090195152  |
| H | 4.202940304  | 5.039158363 | 1.262123093  |
| C | -4.231846304 | 5.582633400 | -0.242217016 |
| O | -4.435333319 | 4.202594301 | -0.152001011 |
| H | -3.663552262 | 3.787275273 | 0.210068016  |
| H | -5.140909369 | 6.018743431 | -0.633372043 |
| H | -3.413858247 | 5.834015422 | -0.914000067 |
| H | -4.030647288 | 6.030001433 | 0.728108053  |

Coord\_6

|   |              |              |              |
|---|--------------|--------------|--------------|
| C | -2.549030182 | -0.776770055 | 0.375880029  |
| C | -3.631164260 | -1.629839119 | 0.155254011  |
| C | -4.702590340 | -1.207460089 | -0.623313045 |
| C | -4.701544337 | 0.074299005  | -1.169932082 |
| C | -3.650599262 | 0.928162067  | -0.935366069 |
| C | -2.556401182 | 0.507530037  | -0.168343009 |
| C | -0.045755004 | 1.083187077  | -0.097188006 |
| C | 0.384923028  | -0.199256015 | -0.775142057 |
| C | 1.006045073  | 1.974508142  | 0.114658009  |
| C | 1.706120125  | -0.789218055 | -0.399636029 |
| C | 2.337212171  | 1.528825109  | 0.008271998  |
| C | 2.659052191  | 0.093363007  | -0.126576007 |
| H | -1.720787125 | -1.106573081 | 0.977294069  |
| H | -3.638555262 | -2.613011188 | 0.587756043  |
| H | -5.531433400 | -1.867844133 | -0.797620057 |
| H | -5.529291396 | 0.401467030  | -1.771742126 |
| H | -3.671443263 | 1.924297137  | -1.334792094 |
| C | -1.446085103 | 1.476279104  | 0.086962005  |
| O | -1.722379123 | 2.634526191  | 0.369744029  |
| H | 1.870397132  | -1.846100134 | -0.467102032 |
| H | 3.144450225  | 2.219920161  | 0.152402011  |
| O | 3.963723283  | -0.123262008 | 0.089420006  |
| C | 4.464365321  | -1.421923102 | -0.072816007 |
| H | 5.526174399  | -1.361838100 | 0.110821009  |
| H | 4.286955309  | -1.782023129 | -1.080440076 |
| H | 4.015254289  | -2.106676150 | 0.637566048  |
| H | 0.214783017  | -0.181002014 | -1.835227134 |
| O | 0.850756062  | 3.262047237  | 0.490380037  |
| H | -0.078326006 | 3.467420250  | 0.544407039  |
| C | 3.371315243  | 5.596427405  | 1.742322125  |
| O | 2.351886171  | 5.858638420  | 0.827987057  |
| H | 1.932619137  | 5.041752364  | 0.590012042  |
| H | 3.014087219  | 5.036715364  | 2.604035188  |
| H | 3.753640270  | 6.547226473  | 2.089651153  |
| H | 4.195412302  | 5.044388365  | 1.292553092  |
| C | -4.223438302 | 5.583810401  | -0.240748020 |
| O | -4.429598318 | 4.204959305  | -0.138423010 |

|   |              |             |              |
|---|--------------|-------------|--------------|
| H | -3.659335264 | 3.791331274 | 0.228813014  |
| H | -5.130495367 | 6.017694432 | -0.638952048 |
| H | -3.402826245 | 5.827558422 | -0.912140067 |
| H | -4.024724291 | 6.039771437 | 0.726071054  |

Coord\_7

|   |              |              |              |
|---|--------------|--------------|--------------|
| C | -2.535174183 | -0.783356057 | 0.371072025  |
| C | -3.613930258 | -1.640563118 | 0.150000011  |
| C | -4.692426338 | -1.217513086 | -0.618573046 |
| C | -4.701698338 | 0.069032003  | -1.154521086 |
| C | -3.654499262 | 0.926871065  | -0.918745067 |
| C | -2.553502185 | 0.505595036  | -0.161653013 |
| C | -0.045940004 | 1.090795080  | -0.111405009 |
| C | 0.391993027  | -0.170585012 | -0.821031059 |
| C | 1.009985073  | 1.979194144  | 0.097950005  |
| C | 1.689092122  | -0.791487056 | -0.408309027 |
| C | 2.336458167  | 1.522673111  | -0.011526999 |
| C | 2.648927189  | 0.083708004  | -0.132212009 |
| H | -1.700884123 | -1.113389080 | 0.964249072  |
| H | -3.613595263 | -2.627326189 | 0.574246042  |
| H | -5.518604397 | -1.881000135 | -0.793648057 |
| H | -5.534775398 | 0.396296026  | -1.748882124 |
| H | -3.683230263 | 1.926222141  | -1.309599093 |
| C | -1.445267106 | 1.476201104  | 0.094009005  |
| O | -1.720722126 | 2.631513188  | 0.387929030  |
| H | 1.837069131  | -1.851300131 | -0.462687033 |
| H | 3.149067228  | 2.207492158  | 0.134736010  |
| O | 3.949348284  | -0.143042008 | 0.099968007  |
| C | 4.441444321  | -1.445538103 | -0.057116006 |
| H | 5.502090395  | -1.393491102 | 0.135676009  |
| H | 4.269568307  | -1.804873130 | -1.066008079 |
| H | 3.981332286  | -2.126678156 | 0.649657044  |
| H | 0.298485020  | -0.080737007 | -1.888951134 |
| O | 0.860259064  | 3.266174238  | 0.478018033  |
| H | -0.068155003 | 3.471794249  | 0.542570037  |
| C | 3.357444242  | 5.611989402  | 1.747360125  |
| O | 2.358496172  | 5.863583423  | 0.807733057  |
| H | 1.943365140  | 5.044196364  | 0.571041043  |
| H | 2.980285213  | 5.065609362  | 2.609144188  |
| H | 3.734880270  | 6.566779472  | 2.089100152  |
| H | 4.189374300  | 5.051477361  | 1.323268096  |
| C | -4.218459305 | 5.583551400  | -0.239030020 |
| O | -4.425891320 | 4.205776302  | -0.124758008 |
| H | -3.656725262 | 3.794643273  | 0.247580016  |
| H | -5.123942370 | 6.014239434  | -0.644203047 |
| H | -3.395490245 | 5.820594418  | -0.909932064 |
| H | -4.022683292 | 6.048182434  | 0.724244054  |

## Coord\_8

|   |              |              |              |
|---|--------------|--------------|--------------|
| C | -2.518487182 | -0.789392054 | 0.365478024  |
| C | -3.592952259 | -1.651736119 | 0.143552008  |
| C | -4.678770337 | -1.229049087 | -0.615044042 |
| C | -4.699531336 | 0.062236007  | -1.139930081 |
| C | -3.656985262 | 0.925000069  | -0.902538067 |
| C | -2.548933183 | 0.504134036  | -0.155355010 |
| C | -0.045324005 | 1.101450079  | -0.125548011 |
| C | 0.399500030  | -0.137310008 | -0.866341062 |
| C | 1.015231071  | 1.986285145  | 0.081308005  |
| C | 1.668654122  | -0.791630056 | -0.417121030 |
| C | 2.336427168  | 1.516976110  | -0.031570000 |
| C | 2.637323189  | 0.073978006  | -0.138022010 |
| H | -1.677960122 | -1.118838082 | 0.950430068  |
| H | -3.583996257 | -2.642064188 | 0.559247042  |
| H | -5.501584395 | -1.896394134 | -0.791200057 |
| H | -5.538132398 | 0.388804030  | -1.726863122 |
| H | -3.694509263 | 1.927498141  | -1.284526092 |
| C | -1.443778101 | 1.477617108  | 0.101058006  |
| O | -1.719627126 | 2.629561190  | 0.406205029  |
| H | 1.797216131  | -1.854310133 | -0.459092035 |
| H | 3.155385228  | 2.194268156  | 0.116652007  |
| O | 3.932643285  | -0.165946011 | 0.110317010  |
| C | 4.412996318  | -1.473362105 | -0.041666004 |
| H | 5.472439392  | -1.431868105 | 0.160284010  |
| H | 4.245824304  | -1.831585130 | -1.051780074 |
| H | 3.940318282  | -2.149674156 | 0.661406049  |
| H | 0.385571027  | 0.023630003  | -1.932603140 |
| O | 0.871741062  | 3.272719234  | 0.465792033  |
| H | -0.055790004 | 3.479025250  | 0.540831039  |
| C | 3.345938241  | 5.629298403  | 1.752204124  |
| O | 2.368122171  | 5.870285421  | 0.787845057  |
| H | 1.956867140  | 5.048545365  | 0.552473039  |
| H | 2.948654214  | 5.096338368  | 2.613360185  |
| H | 3.718911267  | 6.587851474  | 2.088319150  |
| H | 4.184966301  | 5.060430363  | 1.354065095  |
| C | -4.217003305 | 5.581808402  | -0.236934017 |
| O | -4.424271318 | 4.204977303  | -0.110937010 |
| H | -3.655789263 | 3.797147271  | 0.266444020  |
| H | -5.121340368 | 6.008323433  | -0.649005045 |
| H | -3.391911245 | 5.813134421  | -0.907218068 |
| H | -4.024686291 | 6.055144433  | 0.722781053  |

## Coord\_9

|   |              |              |             |
|---|--------------|--------------|-------------|
| C | -2.498846181 | -0.794857058 | 0.359060025 |
| C | -3.568051258 | -1.663354121 | 0.135793010 |

|   |              |              |              |
|---|--------------|--------------|--------------|
| C | -4.661426335 | -1.242105090 | -0.612883046 |
| C | -4.694886340 | 0.053844002  | -1.126281081 |
| C | -3.657956265 | 0.922494066  | -0.886789064 |
| C | -2.542611182 | 0.503136034  | -0.149451011 |
| C | -0.043876001 | 1.115229082  | -0.139479010 |
| C | 0.407588028  | -0.099318008 | -0.910847065 |
| C | 1.021821074  | 1.995842145  | 0.064808004  |
| C | 1.644654119  | -0.789473055 | -0.425976033 |
| C | 2.337072166  | 1.511757110  | -0.051856005 |
| C | 2.624096186  | 0.064228005  | -0.143957008 |
| H | -1.651909117 | -1.122866078 | 0.935831068  |
| H | -3.549552253 | -2.657202192 | 0.542613038  |
| H | -5.480131396 | -1.914077137 | -0.790495055 |
| H | -5.539189397 | 0.378893027  | -1.705839121 |
| H | -3.705210265 | 1.928051137  | -1.259592091 |
| C | -1.441590102 | 1.480536108  | 0.108191008  |
| O | -1.719115125 | 2.628651191  | 0.424676030  |
| H | 1.750538126  | -1.854823134 | -0.456278035 |
| H | 3.163362226  | 2.180214155  | 0.098076007  |
| O | 3.913361283  | -0.191959015 | 0.120473011  |
| C | 4.378652313  | -1.505327109 | -0.026470002 |
| H | 5.436785392  | -1.476957107 | 0.184606013  |
| H | 4.215302302  | -1.862119133 | -1.037751077 |
| H | 3.891858282  | -2.175469155 | 0.672832050  |
| H | 0.475834034  | 0.131260009  | -1.965566142 |
| O | 0.885286063  | 3.281749236  | 0.453735031  |
| H | -0.041140001 | 3.489199249  | 0.539256038  |
| C | 3.337019239  | 5.648418408  | 1.756682127  |
| O | 2.380928170  | 5.878786420  | 0.768198056  |
| H | 1.973254140  | 5.054841362  | 0.534236041  |
| H | 2.919472211  | 5.129020370  | 2.616546187  |
| H | 3.705999268  | 6.610515474  | 2.087089151  |
| H | 4.182364299  | 5.071266362  | 1.384738097  |
| C | -4.219169302 | 5.578502404  | -0.234365015 |
| O | -4.424796320 | 4.202465303  | -0.096923010 |
| H | -3.656595264 | 3.798757271  | 0.285462021  |
| H | -5.122767369 | 5.999856433  | -0.653289047 |
| H | -3.392148242 | 5.805159418  | -0.903862063 |
| H | -4.030916289 | 6.060541438  | 0.721807049  |

Coord\_10

|   |              |              |              |
|---|--------------|--------------|--------------|
| C | -2.495403179 | -0.784348058 | 0.383046026  |
| C | -3.555586255 | -1.662881121 | 0.156119010  |
| C | -4.655586335 | -1.247907090 | -0.586536041 |
| C | -4.704632340 | 0.051733003  | -1.090059079 |
| C | -3.677123267 | 0.930044065  | -0.846250059 |
| C | -2.555387183 | 0.517088036  | -0.114793008 |

|   |              |              |              |
|---|--------------|--------------|--------------|
| C | -0.063991002 | 1.152610084  | -0.117662011 |
| C | 0.399085028  | -0.036183002 | -0.915823067 |
| C | 1.004707075  | 2.031166144  | 0.085667007  |
| C | 1.599824116  | -0.760871057 | -0.391817028 |
| C | 2.314765165  | 1.533206109  | -0.030784003 |
| C | 2.589171186  | 0.081224003  | -0.105440006 |
| H | -1.642773116 | -1.107157081 | 0.954657067  |
| H | -3.525374255 | -2.659514189 | 0.555286040  |
| H | -5.467262393 | -1.927478138 | -0.767370057 |
| H | -5.553908399 | 0.371533029  | -1.665260122 |
| H | -3.736418271 | 1.937859140  | -1.211194085 |
| C | -1.462696103 | 1.502445110  | 0.146326008  |
| O | -1.746886125 | 2.646054190  | 0.471765037  |
| H | 1.682192122  | -1.828356133 | -0.409442027 |
| H | 3.147376226  | 2.193654157  | 0.121930011  |
| O | 3.871148280  | -0.190908011 | 0.179007011  |
| C | 4.321430313  | -1.510325109 | 0.040256000  |
| H | 5.377397385  | -1.494890110 | 0.263361018  |
| H | 4.164680302  | -1.867262133 | -0.972053071 |
| H | 3.818590274  | -2.172976159 | 0.735294052  |
| H | 0.553923038  | 0.260413019  | -1.948816142 |
| O | 0.871722064  | 3.316845240  | 0.476744033  |
| H | -0.054130006 | 3.523860253  | 0.569829042  |
| C | 3.292251235  | 5.700649409  | 1.798847129  |
| O | 2.360778169  | 5.916639427  | 0.783921055  |
| H | 1.958977139  | 5.089335368  | 0.551586037  |
| H | 2.853114204  | 5.195245374  | 2.656301189  |
| H | 3.654536262  | 6.667422481  | 2.123015154  |
| H | 4.145453297  | 5.116762366  | 1.456597103  |
| C | -4.257737306 | 5.583869404  | -0.214528018 |
| O | -4.457376319 | 4.208210300  | -0.064509003 |
| H | -3.689251263 | 3.811854276  | 0.325671025  |
| H | -5.160731370 | 5.996285429  | -0.643507047 |
| H | -3.427552248 | 5.807939419  | -0.880968061 |
| H | -4.078156292 | 6.076420438  | 0.737935054  |

Coord\_11

|   |              |              |              |
|---|--------------|--------------|--------------|
| C | -2.530529182 | -0.775304054 | 0.399456029  |
| C | -3.599312261 | -1.643733117 | 0.177792014  |
| C | -4.687316338 | -1.228072088 | -0.582458042 |
| C | -4.715879341 | 0.061104007  | -1.108384079 |
| C | -3.677579264 | 0.931656066  | -0.871617065 |
| C | -2.567797183 | 0.517873039  | -0.123662008 |
| C | -0.066714006 | 1.128936080  | -0.101624009 |
| C | 0.390569027  | -0.085156007 | -0.859124063 |
| C | 0.996706073  | 2.012114144  | 0.118988007  |
| C | 1.632039115  | -0.763281057 | -0.389711029 |

|   |              |              |              |
|---|--------------|--------------|--------------|
| C | 2.311498168  | 1.534386111  | 0.017152000  |
| C | 2.606250186  | 0.099615008  | -0.092168008 |
| H | -1.688784120 | -1.098548077 | 0.986424070  |
| H | -3.585400260 | -2.633408187 | 0.594818041  |
| H | -5.505866397 | -1.900758137 | -0.758186054 |
| H | -5.556210400 | 0.382040028  | -1.695930124 |
| H | -3.720977270 | 1.933292140  | -1.255178092 |
| C | -1.467229105 | 1.496724106  | 0.131300009  |
| O | -1.745478127 | 2.647323189  | 0.435786032  |
| H | 1.754241128  | -1.826213134 | -0.435913029 |
| H | 3.133035226  | 2.204693159  | 0.185260012  |
| O | 3.898348281  | -0.145665013 | 0.170010013  |
| C | 4.380707314  | -1.451274104 | 0.010049002  |
| H | 5.437700393  | -1.411170104 | 0.224829014  |
| H | 4.225894303  | -1.799397130 | -1.005592071 |
| H | 3.901108279  | -2.135615155 | 0.700554053  |
| H | 0.398217030  | 0.089703005  | -1.916631137 |
| O | 0.852712060  | 3.297262237  | 0.507602036  |
| H | -0.074842004 | 3.504838252  | 0.577704041  |
| C | 3.309460238  | 5.669906407  | 1.796185130  |
| O | 2.346065169  | 5.897101425  | 0.814118057  |
| H | 1.938410141  | 5.072023366  | 0.584090041  |
| H | 2.899289211  | 5.149556369  | 2.659028193  |
| H | 3.677745267  | 6.633194477  | 2.123875151  |
| H | 4.153978300  | 5.095143369  | 1.418746102  |
| C | -4.252847306 | 5.588975404  | -0.226654019 |
| O | -4.453366319 | 4.211756301  | -0.093608005 |
| H | -3.683668263 | 3.809890272  | 0.287639019  |
| H | -5.157900372 | 6.008311432  | -0.644493047 |
| H | -3.426512245 | 5.820816418  | -0.895215063 |
| H | -4.066608295 | 6.068692434  | 0.731093052  |

Coord\_12

|   |              |              |              |
|---|--------------|--------------|--------------|
| C | -2.561584187 | -0.765681056 | 0.414351030  |
| C | -3.638139260 | -1.624677116 | 0.197425014  |
| C | -4.714358338 | -1.209458087 | -0.580147041 |
| C | -4.723520338 | 0.068805007  | -1.127635082 |
| C | -3.675181265 | 0.932122065  | -0.897416065 |
| C | -2.577119185 | 0.518624036  | -0.133241010 |
| C | -0.067319003 | 1.107409081  | -0.085953006 |
| C | 0.384319025  | -0.128347010 | -0.801555056 |
| C | 0.990576074  | 1.995358143  | 0.151837013  |
| C | 1.659685118  | -0.761684053 | -0.387656028 |
| C | 2.309101164  | 1.536107112  | 0.064033003  |
| C | 2.621426191  | 0.118730007  | -0.079157005 |
| H | -1.730592123 | -1.088382079 | 1.016429076  |
| H | -3.639739259 | -2.607020187 | 0.631700044  |

|   |              |              |              |
|---|--------------|--------------|--------------|
| H | -5.539178401 | -1.875724137 | -0.751153055 |
| H | -5.555074399 | 0.390054026  | -1.727342122 |
| H | -3.703465265 | 1.927158139  | -1.298995095 |
| C | -1.469477108 | 1.491610105  | 0.116017011  |
| O | -1.742821123 | 2.648439192  | 0.399797031  |
| H | 1.816555131  | -1.818477129 | -0.463465034 |
| H | 3.120189226  | 2.215007157  | 0.246975018  |
| O | 3.921919281  | -0.104673006 | 0.160035011  |
| C | 4.430157319  | -1.397522099 | -0.021921003 |
| H | 5.487874397  | -1.337214096 | 0.184147015  |
| H | 4.274887306  | -1.735765127 | -1.040796074 |
| H | 3.971766285  | -2.101120149 | 0.663693047  |
| H | 0.252581016  | -0.079511004 | -1.852439132 |
| O | 0.835115059  | 3.279902238  | 0.537756038  |
| H | -0.093652006 | 3.487688252  | 0.584782041  |
| C | 3.326336240  | 5.642763408  | 1.791356128  |
| O | 2.332067166  | 5.880203425  | 0.843158061  |
| H | 1.918921136  | 5.057139362  | 0.615727046  |
| H | 2.945374210  | 5.107488365  | 2.658451194  |
| H | 3.700470265  | 6.602654478  | 2.122300151  |
| H | 4.161232299  | 5.077794367  | 1.379298097  |
| C | -4.249100308 | 5.591851403  | -0.237222017 |
| O | -4.449382318 | 4.213086304  | -0.121569011 |
| H | -3.677746267 | 3.806353272  | 0.250393016  |
| H | -5.156584372 | 6.017301434  | -0.643504046 |
| H | -3.426955246 | 5.832429419  | -0.907857065 |
| H | -4.056411293 | 6.058512435  | 0.725710054  |

Coord\_13

|   |              |              |              |
|---|--------------|--------------|--------------|
| C | -2.588584186 | -0.755447054 | 0.427821031  |
| C | -3.672029263 | -1.605815117 | 0.215178017  |
| C | -4.736726342 | -1.192255085 | -0.579446040 |
| C | -4.727669341 | 0.074693004  | -1.147728085 |
| C | -3.670103265 | 0.931440066  | -0.923628066 |
| C | -2.583478187 | 0.519429037  | -0.143505012 |
| C | -0.065887007 | 1.088365076  | -0.070689005 |
| C | 0.379985027  | -0.165461010 | -0.743224054 |
| C | 0.986345069  | 1.981101145  | 0.184244013  |
| C | 1.682713123  | -0.756176053 | -0.385661029 |
| C | 2.307714164  | 1.538451113  | 0.110001006  |
| C | 2.634870188  | 0.138518008  | -0.066363002 |
| H | -1.768168126 | -1.076565080 | 1.044760077  |
| H | -3.688271264 | -2.580493188 | 0.666145048  |
| H | -5.567172401 | -1.852675134 | -0.746061053 |
| H | -5.550656399 | 0.395363029  | -1.759416127 |
| H | -3.684141263 | 1.919493139  | -1.342676094 |
| C | -1.469637104 | 1.487334109  | 0.100428010  |



|   |              |              |              |
|---|--------------|--------------|--------------|
| O | -1.739215124 | 2.649662189  | 0.363696025  |
| H | 1.869073136  | -1.805652132 | -0.492000034 |
| H | 3.109060221  | 2.224656159  | 0.307343024  |
| O | 3.942221282  | -0.068390005 | 0.149070009  |
| C | 4.469928323  | -1.349985096 | -0.055667002 |
| H | 5.528341396  | -1.274192092 | 0.141254008  |
| H | 4.311781311  | -1.677285119 | -1.077638077 |
| H | 4.030315292  | -2.070523147 | 0.624706046  |
| H | 0.119369010  | -0.243397018 | -1.758434128 |
| O | 0.818971057  | 3.264950235  | 0.567269041  |
| H | -0.110511006 | 3.472625248  | 0.591061041  |
| C | 3.342972239  | 5.619195404  | 1.784779127  |
| O | 2.318997165  | 5.866006425  | 0.871319064  |
| H | 1.900680137  | 5.044782364  | 0.646706045  |
| H | 2.991314214  | 5.069059365  | 2.654949189  |
| H | 3.722849266  | 6.575744476  | 2.118769152  |
| H | 4.167317298  | 5.064604365  | 1.338762098  |
| C | -4.246982308 | 5.592533401  | -0.246489016 |
| O | -4.445825321 | 4.212247304  | -0.148567010 |
| H | -3.671849264 | 3.801376275  | 0.213770013  |
| H | -5.157307371 | 6.023191436  | -0.640810047 |
| H | -3.429414248 | 5.842820423  | -0.919160064 |
| H | -4.048035290 | 6.046003436  | 0.721485050  |

Coord\_14

|   |              |              |              |
|---|--------------|--------------|--------------|
| C | -2.611453189 | -0.744547055 | 0.440021032  |
| C | -3.700816268 | -1.587278112 | 0.231255014  |
| C | -4.754289344 | -1.176745085 | -0.580202043 |
| C | -4.728321341 | 0.078520008  | -1.168614087 |
| C | -3.662439265 | 0.929551068  | -0.950245068 |
| C | -2.586930184 | 0.520382037  | -0.154397009 |
| C | -0.062466003 | 1.072253079  | -0.055756004 |
| C | 0.377242026  | -0.196048016 | -0.684080051 |
| C | 0.984098071  | 1.969640140  | 0.216361013  |
| C | 1.701008125  | -0.746651053 | -0.383688029 |
| C | 2.307517167  | 1.541551112  | 0.155279010  |
| C | 2.646759192  | 0.159000009  | -0.053723006 |
| H | -1.801408130 | -1.062932077 | 1.071607075  |
| H | -3.730730266 | -2.553981185 | 0.698436053  |
| H | -5.589641400 | -1.832035132 | -0.742722055 |
| H | -5.542979397 | 0.397600030  | -1.792142131 |
| H | -3.663202264 | 1.910262139  | -1.386294101 |
| C | -1.467888105 | 1.484181107  | 0.084535007  |
| O | -1.734992126 | 2.651293193  | 0.327392026  |
| H | 1.911615140  | -1.787991127 | -0.521412039 |
| H | 3.099930226  | 2.233720161  | 0.366708028  |
| O | 3.959560283  | -0.037343001 | 0.137015007  |

|   |              |              |              |
|---|--------------|--------------|--------------|
| C | 4.499940325  | -1.309630092 | -0.091364008 |
| H | 5.559271399  | -1.223457091 | 0.095843006  |
| H | 4.336381311  | -1.624840119 | -1.116251082 |
| H | 4.076258292  | -2.044876148 | 0.583432041  |
| H | 0.000235002  | -0.398292030 | -1.636987118 |
| O | 0.804410057  | 3.252684234  | 0.596335044  |
| H | -0.125266008 | 3.459980251  | 0.596691042  |
| C | 3.359639243  | 5.599192404  | 1.776988130  |
| O | 2.307223167  | 5.854630421  | 0.899013063  |
| H | 1.883992135  | 5.035119360  | 0.677362050  |
| H | 3.037228220  | 5.034294362  | 2.649027192  |
| H | 3.745227267  | 6.552408473  | 2.113879152  |
| H | 4.172505298  | 5.055475364  | 1.297741093  |
| C | -4.247103304 | 5.590983404  | -0.254867019 |
| O | -4.443170317 | 4.209205302  | -0.174902013 |
| H | -3.666412264 | 3.795051274  | 0.177523012  |
| H | -5.160720374 | 6.025796432  | -0.636880044 |
| H | -3.434534250 | 5.851964421  | -0.929526069 |
| H | -4.042125290 | 6.031243434  | 0.717960053  |

Coord\_15

|   |              |              |              |
|---|--------------|--------------|--------------|
| C | -2.629986188 | -0.732893053 | 0.451166034  |
| C | -3.724139268 | -1.569241111 | 0.245889019  |
| C | -4.766704345 | -1.163351085 | -0.582293040 |
| C | -4.725303342 | 0.079881004  | -1.190302088 |
| C | -3.652182264 | 0.926317064  | -0.977295069 |
| C | -2.587453186 | 0.521593038  | -0.165827010 |
| C | -0.057071004 | 1.059729078  | -0.040932003 |
| C | 0.375787026  | -0.219391014 | -0.623893044 |
| C | 0.984009069  | 1.961432140  | 0.248494016  |
| C | 1.714341121  | -0.732752054 | -0.381645029 |
| C | 2.308763168  | 1.545618110  | 0.200181017  |
| C | 2.657268191  | 0.180288011  | -0.041148003 |
| H | -1.830095131 | -1.047212073 | 1.097269076  |
| H | -3.766623269 | -2.527676181 | 0.728901051  |
| H | -5.606117402 | -1.814427129 | -0.741000054 |
| H | -5.531884397 | 0.396166029  | -1.825616132 |
| H | -3.640781262 | 1.899337138  | -1.429975100 |
| C | -1.464405108 | 1.482536107  | 0.068400007  |
| O | -1.730571125 | 2.653708189  | 0.290807024  |
| H | 1.943781142  | -1.765446128 | -0.551600040 |
| H | 3.093192222  | 2.242296161  | 0.425503033  |
| O | 3.974144286  | -0.012171003 | 0.123663008  |
| C | 4.519769327  | -1.277532094 | -0.129394008 |
| H | 5.580460402  | -1.186648087 | 0.047302006  |
| H | 4.348040314  | -1.579307115 | -1.156955084 |
| H | 4.108704297  | -2.025282148 | 0.539518039  |

|   |              |              |              |
|---|--------------|--------------|--------------|
| H | -0.103811008 | -0.540669037 | -1.490445105 |
| O | 0.791709057  | 3.243554233  | 0.625319045  |
| H | -0.137603008 | 3.450293249  | 0.602024043  |
| C | 3.376908244  | 5.582760402  | 1.768662129  |
| O | 2.297401166  | 5.846282422  | 0.926820068  |
| H | 1.869398136  | 5.028429364  | 0.708203051  |
| H | 3.083524223  | 5.003220360  | 2.641344190  |
| H | 3.768300274  | 6.532577471  | 2.108380154  |
| H | 4.177347302  | 5.050293364  | 1.256952090  |
| C | -4.250320305 | 5.587052400  | -0.262952017 |
| O | -4.442046318 | 4.203801301  | -0.201032013 |
| H | -3.662017262 | 3.787407271  | 0.141297009  |
| H | -5.167732374 | 6.024751434  | -0.632428044 |
| H | -3.443202247 | 5.859761424  | -0.939511067 |
| H | -4.039642290 | 6.014247435  | 0.714496053  |

Coord\_16

|   |              |              |              |
|---|--------------|--------------|--------------|
| C | -2.643777188 | -0.720340054 | 0.461514032  |
| C | -3.741317272 | -1.551965109 | 0.259305017  |
| C | -4.773286341 | -1.152732086 | -0.585680044 |
| C | -4.718198339 | 0.078119008  | -1.212906085 |
| C | -3.639201261 | 0.921490068  | -1.004856070 |
| C | -2.584916189 | 0.523221036  | -0.177686015 |
| C | -0.049695004 | 1.051842078  | -0.025815002 |
| C | 0.375306025  | -0.234320019 | -0.562228041 |
| C | 0.986384069  | 1.957219143  | 0.281129023  |
| C | 1.722272123  | -0.713772054 | -0.379361026 |
| C | 2.311805165  | 1.550980109  | 0.245131015  |
| C | 2.666535191  | 0.202608014  | -0.028521003 |
| H | -1.853825132 | -1.028961073 | 1.122143079  |
| H | -3.795059275 | -2.501844182 | 0.757882052  |
| H | -5.615700405 | -1.800825131 | -0.740884053 |
| H | -5.516957396 | 0.390095027  | -1.860097136 |
| H | -3.616969260 | 1.886470135  | -1.473921106 |
| C | -1.459393106 | 1.482976107  | 0.052149005  |
| O | -1.726549124 | 2.657440190  | 0.253876018  |
| H | 1.964753140  | -1.737596128 | -0.582445041 |
| H | 3.089426221  | 2.250492164  | 0.484270035  |
| O | 3.986004286  | 0.006303999  | 0.108667008  |
| C | 4.528425328  | -1.254967093 | -0.170372013 |
| H | 5.591095404  | -1.165875086 | -0.005343002 |
| H | 4.345403312  | -1.541617111 | -1.200282085 |
| H | 4.126092294  | -2.012943143 | 0.492388037  |
| H | -0.192352014 | -0.666956050 | -1.320900096 |
| O | 0.781419057  | 3.238306234  | 0.654810045  |
| H | -0.146915009 | 3.444502250  | 0.607670042  |
| C | 3.395915243  | 5.569887398  | 1.760674124  |

|   |              |             |              |
|---|--------------|-------------|--------------|
| O | 2.290742164  | 5.841297419 | 0.955555070  |
| H | 1.857906136  | 5.025179363 | 0.739964052  |
| H | 3.131134226  | 4.975836358 | 2.632748187  |
| H | 3.793438273  | 6.516109470 | 2.103221152  |
| H | 4.182893302  | 5.048878365 | 1.217259086  |
| C | -4.257989306 | 5.580415401 | -0.271576018 |
| O | -4.443410320 | 4.195681304 | -0.227617016 |
| H | -3.659537262 | 3.778384270 | 0.104597006  |
| H | -5.179785371 | 6.019392435 | -0.628473047 |
| H | -3.456805251 | 5.866008420 | -0.949867066 |
| H | -4.042155289 | 5.994914431 | 0.710229053  |

Coord\_17

|   |              |              |              |
|---|--------------|--------------|--------------|
| C | -2.652058193 | -0.706638051 | 0.471330032  |
| C | -3.751084270 | -1.535882111 | 0.271641017  |
| C | -4.772746342 | -1.145999083 | -0.590514041 |
| C | -4.706197340 | 0.072126007  | -1.236749086 |
| C | -3.623203259 | 0.914646065  | -1.033126073 |
| C | -2.579041183 | 0.525529038  | -0.189873014 |
| C | -0.040340002 | 1.050423073  | -0.009756002 |
| C | 0.375389027  | -0.238828017 | -0.498421033 |
| C | 0.991761071  | 1.958281138  | 0.315000023  |
| C | 1.723954123  | -0.688486049 | -0.376553026 |
| C | 2.317160168  | 1.558165114  | 0.290687022  |
| C | 2.674572192  | 0.226349017  | -0.015678003 |
| H | -1.871853137 | -1.007419071 | 1.146714081  |
| H | -3.814400275 | -2.476926178 | 0.785645056  |
| H | -5.616709403 | -1.792867130 | -0.742622051 |
| H | -5.497379394 | 0.377750025  | -1.896136134 |
| H | -3.591857259 | 1.871229137  | -1.518464109 |
| C | -1.453174104 | 1.486470106  | 0.035988001  |
| O | -1.723927125 | 2.663327192  | 0.216557015  |
| H | 1.972917144  | -1.703508122 | -0.613783044 |
| H | 3.089566220  | 2.258401163  | 0.543672038  |
| O | 3.994796286  | 0.016924999  | 0.091535006  |
| C | 4.523944324  | -1.243566091 | -0.215150018 |
| H | 5.589306404  | -1.164039085 | -0.063454004 |
| H | 4.325972310  | -1.512857111 | -1.246948089 |
| H | 4.125667296  | -2.009243146 | 0.441254031  |
| H | -0.265528020 | -0.773062057 | -1.129951079 |
| O | 0.774624056  | 3.238268234  | 0.685707048  |
| H | -0.152015013 | 3.444340248  | 0.614617043  |
| C | 3.418922245  | 5.560467398  | 1.754161127  |
| O | 2.289615164  | 5.840225422  | 0.986379074  |
| H | 1.851479136  | 5.026161363  | 0.773714056  |
| H | 3.182015227  | 4.952034357  | 2.624338190  |
| H | 3.823372274  | 6.502654466  | 2.099640151  |

|   |              |             |              |
|---|--------------|-------------|--------------|
| H | 4.191185303  | 5.050825362 | 1.179729084  |
| C | -4.272500309 | 5.570424402 | -0.281874019 |
| O | -4.448913319 | 4.184130301 | -0.255607021 |
| H | -3.660475266 | 3.767756269 | 0.066735003  |
| H | -5.199423376 | 6.008501433 | -0.626452045 |
| H | -3.477789251 | 5.870339423 | -0.961594068 |
| H | -4.052449290 | 5.972903431 | 0.704011051  |

Coord\_18

|   |              |              |              |
|---|--------------|--------------|--------------|
| C | -2.653349189 | -0.691333049 | 0.480790033  |
| C | -3.750973270 | -1.521805107 | 0.282770022  |
| C | -4.762591341 | -1.145187082 | -0.597383042 |
| C | -4.687763339 | 0.059903002  | -1.262578090 |
| C | -3.603658261 | 0.905053066  | -1.062547074 |
| C | -2.569318187 | 0.529028037  | -0.202359015 |
| C | -0.029111004 | 1.059005074  | 0.008274999  |
| C | 0.375253028  | -0.229273018 | -0.431559033 |
| C | 1.001118073  | 1.967017140  | 0.351190026  |
| C | 1.717695126  | -0.654829048 | -0.372747025 |
| C | 2.325612166  | 1.568063115  | 0.337581022  |
| C | 2.681020191  | 0.252118018  | -0.002363999 |
| H | -1.882730137 | -0.981209070 | 1.171501082  |
| H | -3.821442275 | -2.453777176 | 0.812177056  |
| H | -5.605882405 | -1.793559130 | -0.747036056 |
| H | -5.471609393 | 0.356187026  | -1.934840137 |
| H | -3.565687259 | 1.852889134  | -1.564181113 |
| C | -1.446415103 | 1.494835107  | 0.020217000  |
| O | -1.724646123 | 2.672885191  | 0.178836012  |
| H | 1.965030143  | -1.661478119 | -0.645298047 |
| H | 3.095216225  | 2.266020162  | 0.604506043  |
| O | 3.999355285  | 0.017923001  | 0.071676005  |
| C | 4.502521324  | -1.245629088 | -0.264703017 |
| H | 5.571213400  | -1.185453083 | -0.128685011 |
| H | 4.285232308  | -1.494478108 | -1.297718095 |
| H | 4.102397293  | -2.015888146 | 0.385263030  |
| H | -0.324139025 | -0.853208063 | -0.918471064 |
| O | 0.773548053  | 3.245995233  | 0.719401050  |
| H | -0.150487013 | 3.453267246  | 0.624458047  |
| C | 3.450633250  | 5.554074402  | 1.750672124  |
| O | 2.298922165  | 5.843997419  | 1.021019075  |
| H | 1.854170134  | 5.032812364  | 0.811061058  |
| H | 3.240298232  | 4.931367355  | 2.617576188  |
| H | 3.863796277  | 6.491276468  | 2.099322153  |
| H | 4.206399302  | 5.055112364  | 1.145722080  |
| C | -4.298508307 | 5.555768399  | -0.295421020 |
| O | -4.461757319 | 4.167707301  | -0.286393018 |
| H | -3.667736265 | 3.754980269  | 0.026721001  |

|   |              |             |              |
|---|--------------|-------------|--------------|
| H | -5.231612376 | 5.989722430 | -0.628401047 |
| H | -3.510938252 | 5.872099425 | -0.976008073 |
| H | -4.075922296 | 5.947336428 | 0.694307052  |

Coord\_19

|   |              |              |              |
|---|--------------|--------------|--------------|
| C | -2.637431189 | -0.695595048 | 0.436158033  |
| C | -3.736978267 | -1.523800110 | 0.243698019  |
| C | -4.750410342 | -1.147863083 | -0.635095044 |
| C | -4.675607339 | 0.053070006  | -1.303631095 |
| C | -3.587005259 | 0.897287067  | -1.110708078 |
| C | -2.550899183 | 0.522000039  | -0.253248017 |
| C | -0.005549000 | 1.052874074  | -0.040131003 |
| C | 0.369371027  | -0.227380018 | -0.454634034 |
| C | 1.038664077  | 1.944421139  | 0.317609020  |
| C | 1.693231124  | -0.646326048 | -0.487964036 |
| C | 2.357777168  | 1.530150110  | 0.286557021  |
| C | 2.689447195  | 0.231993015  | -0.111990009 |
| H | -1.867100136 | -0.984384070 | 1.127377082  |
| H | -3.807979275 | -2.453741176 | 0.776626055  |
| H | -5.595569402 | -1.795063131 | -0.779434055 |
| H | -5.461169393 | 0.349656026  | -1.973727140 |
| H | -3.548627256 | 1.843053131  | -1.616089115 |
| C | -1.427195105 | 1.488841106  | -0.036476003 |
| O | -1.709663126 | 2.665927193  | 0.120122008  |
| H | 1.916141140  | -1.642602117 | -0.814793060 |
| H | 3.137568227  | 2.211928161  | 0.564997040  |
| O | 4.000131287  | -0.051352006 | -0.099748006 |
| C | 4.445979322  | -1.319964093 | -0.493115037 |
| H | 5.520039399  | -1.300779094 | -0.392400028 |
| H | 4.186598299  | -1.527752112 | -1.525463108 |
| H | 4.041023289  | -2.096791151 | 0.146030013  |
| H | -0.383459028 | -0.916571064 | -0.778715057 |
| O | 0.819464060  | 3.219030233  | 0.705953052  |
| H | -0.100960008 | 3.438381246  | 0.605170044  |
| C | 3.567884255  | 5.470021396  | 1.689361124  |
| O | 2.387378174  | 5.792071415  | 1.022001074  |
| H | 1.924343139  | 4.991646359  | 0.810230059  |
| H | 3.390906242  | 4.822152346  | 2.545209183  |
| H | 4.005295289  | 6.392334462  | 2.047926146  |
| H | 4.290869311  | 4.984147356  | 1.035644073  |
| C | -4.311069308 | 5.532672400  | -0.254039016 |
| O | -4.462977321 | 4.143584296  | -0.278974022 |
| H | -3.659670265 | 3.729799269  | 0.007872999  |
| H | -5.254252378 | 5.967519428  | -0.556090040 |
| H | -3.540258255 | 5.873784420  | -0.941803066 |
| H | -4.071159293 | 5.899610424  | 0.741088051  |

LIIC path connecting T1-PP-KETO and S0-KETO

Coord\_1

|   |              |              |              |
|---|--------------|--------------|--------------|
| C | -2.644569192 | -0.728275051 | 0.387187028  |
| C | -3.731929270 | -1.539068112 | 0.153002013  |
| C | -4.757312343 | -1.121638080 | -0.687622051 |
| C | -4.685233337 | 0.131623009  | -1.286621095 |
| C | -3.588897259 | 0.956337067  | -1.053740078 |
| C | -2.542022182 | 0.531436037  | -0.223420016 |
| C | -0.024544003 | 1.053438076  | -0.028619001 |
| C | 0.407289027  | -0.223071018 | -0.378902028 |
| C | 1.053265078  | 2.024341144  | 0.263039019  |
| C | 1.806889131  | -0.627978044 | -0.403566027 |
| C | 2.415889175  | 1.594235116  | 0.219114016  |
| C | 2.778613202  | 0.245426016  | -0.114776011 |
| H | -1.879779133 | -1.054533076 | 1.068138075  |
| H | -3.796532272 | -2.497316182 | 0.636248047  |
| H | -5.604355401 | -1.758799128 | -0.859599063 |
| H | -5.475024396 | 0.469498036  | -1.931817138 |
| H | -3.549549258 | 1.926971139  | -1.507620109 |
| C | -1.401666102 | 1.430838104  | 0.021825000  |
| O | -1.782582126 | 2.731372194  | 0.146876008  |
| H | 2.019257148  | -1.646301119 | -0.664962046 |
| H | 3.181782230  | 2.311863168  | 0.437956029  |
| O | 4.103368296  | 0.022504003  | -0.090893008 |
| C | 4.578089327  | -1.258793092 | -0.399694027 |
| H | 5.652243407  | -1.209961086 | -0.312042023 |
| H | 4.310949312  | -1.542177113 | -1.412130100 |
| H | 4.193362301  | -1.996792145 | 0.295919024  |
| H | -0.309556022 | -0.960684068 | -0.673054050 |
| O | 0.821174059  | 3.221138232  | 0.535095038  |
| H | -1.028187071 | 3.287926238  | 0.300659023  |
| C | 3.429554247  | 5.558772401  | 1.737109126  |
| O | 2.278880164  | 5.929631427  | 1.042281072  |
| H | 1.801987130  | 5.150099368  | 0.792734057  |
| H | 3.208504231  | 4.900366353  | 2.574527185  |
| H | 3.881163277  | 6.460897465  | 2.126710155  |
| H | 4.157675297  | 5.066121362  | 1.094222079  |
| C | -4.298487309 | 5.548618399  | -0.269717019 |
| O | -4.535530327 | 4.174030303  | -0.213512013 |
| H | -3.747636267 | 3.723205270  | 0.062874004  |
| H | -5.213506376 | 6.023369435  | -0.597957041 |
| H | -3.509881253 | 5.802358419  | -0.975643073 |
| H | -4.034928289 | 5.959594427  | 0.702422048  |

Coord\_2

|   |              |              |             |
|---|--------------|--------------|-------------|
| C | -2.637917190 | -0.717027050 | 0.380929026 |
| C | -3.732423268 | -1.519495111 | 0.162754014 |

|   |              |              |              |
|---|--------------|--------------|--------------|
| C | -4.773681346 | -1.091106077 | -0.655563049 |
| C | -4.707395339 | 0.166280012  | -1.245476087 |
| C | -3.603207259 | 0.985175068  | -1.027278072 |
| C | -2.540752183 | 0.548854038  | -0.221299015 |
| C | -0.011226003 | 1.052382077  | -0.040472005 |
| C | 0.425871028  | -0.209649014 | -0.414833031 |
| C | 1.054609077  | 2.019822145  | 0.293159021  |
| C | 1.827463130  | -0.612596047 | -0.423807031 |
| C | 2.418812176  | 1.595997117  | 0.265808018  |
| C | 2.790842202  | 0.255879018  | -0.095386009 |
| H | -1.860136132 | -1.053511076 | 1.041767077  |
| H | -3.791917274 | -2.481574180 | 0.638895045  |
| H | -5.626036406 | -1.724031124 | -0.816631056 |
| H | -5.507702399 | 0.511946037  | -1.873384137 |
| H | -3.567981258 | 1.958441140  | -1.475476104 |
| C | -1.395059102 | 1.441826104  | -0.001973000 |
| O | -1.745594123 | 2.756895196  | 0.051534006  |
| H | 2.047279147  | -1.624162116 | -0.704354048 |
| H | 3.179135227  | 2.308804169  | 0.517436039  |
| O | 4.115130298  | 0.035269002  | -0.052556006 |
| C | 4.598801330  | -1.237839091 | -0.381559027 |
| H | 5.671030406  | -1.188773083 | -0.272893019 |
| H | 4.351077315  | -1.498452107 | -1.404949102 |
| H | 4.202954300  | -1.992125146 | 0.289861019  |
| H | -0.285911023 | -0.942270070 | -0.734076050 |
| O | 0.808538057  | 3.210766231  | 0.580010042  |
| H | -0.983055073 | 3.295369237  | 0.228412015  |
| C | 3.472619247  | 5.491164398  | 1.728606126  |
| O | 2.291128167  | 5.903114424  | 1.113111082  |
| H | 1.786418126  | 5.139960369  | 0.867372063  |
| H | 3.287244234  | 4.820646345  | 2.565175184  |
| H | 3.968837284  | 6.374324459  | 2.107241152  |
| H | 4.148051298  | 4.995501357  | 1.032750077  |
| C | -4.382576315 | 5.521229397  | -0.307351020 |
| O | -4.556907331 | 4.139149299  | -0.212116017 |
| H | -3.734462267 | 3.728291267  | 0.021476002  |
| H | -5.336068383 | 5.950744430  | -0.584434043 |
| H | -3.651981262 | 5.793106417  | -1.066871077 |
| H | -4.075631291 | 5.962319430  | 0.638477048  |

Coord\_3

|   |              |              |              |
|---|--------------|--------------|--------------|
| C | -2.629287188 | -0.705492049 | 0.374575025  |
| C | -3.728391271 | -1.502918109 | 0.173343015  |
| C | -4.785162343 | -1.068272079 | -0.624646042 |
| C | -4.726856340 | 0.191833013  | -1.208529085 |
| C | -3.617378261 | 1.008272073  | -1.006007073 |
| C | -2.539675185 | 0.565346043  | -0.222410017 |



|   |              |              |              |
|---|--------------|--------------|--------------|
| C | -0.000526002 | 1.053040077  | -0.053415003 |
| C | 0.441697032  | -0.193780015 | -0.452988034 |
| C | 1.053095074  | 2.014533146  | 0.324184021  |
| C | 1.844641134  | -0.596350041 | -0.445264030 |
| C | 2.418154176  | 1.595336117  | 0.314427025  |
| C | 2.799267202  | 0.264846022  | -0.075176005 |
| H | -1.838959130 | -1.048516077 | 1.016770072  |
| H | -3.781186274 | -2.467703179 | 0.644677047  |
| H | -5.640908404 | -1.699477120 | -0.774097054 |
| H | -5.537463396 | 0.541643040  | -1.820765133 |
| H | -3.588073256 | 1.983073145  | -1.450929106 |
| C | -1.390973102 | 1.453658105  | -0.028459004 |
| O | -1.713930125 | 2.777801201  | -0.050908005 |
| H | 2.071688151  | -1.600449117 | -0.745943051 |
| H | 3.172630226  | 2.301403164  | 0.600370041  |
| O | 4.122480295  | 0.044874003  | -0.012224000 |
| C | 4.614731333  | -1.219489087 | -0.362367028 |
| H | 5.684543407  | -1.171799083 | -0.231471019 |
| H | 4.387501315  | -1.455343106 | -1.396421098 |
| H | 4.206864301  | -1.990114145 | 0.282722021  |
| H | -0.264861018 | -0.919772068 | -0.799121057 |
| O | 0.793552059  | 3.199113229  | 0.626692043  |
| H | -0.948402070 | 3.303893235  | 0.149316013  |
| C | 3.507770253  | 5.431488391  | 1.717030125  |
| O | 2.298968166  | 5.876422422  | 1.182870085  |
| H | 1.768811129  | 5.127359368  | 0.947186069  |
| H | 3.361343242  | 4.751742340  | 2.553983185  |
| H | 4.044716290  | 6.298702453  | 2.076469151  |
| H | 4.128077296  | 4.933640357  | 0.973112071  |
| C | -4.449330321 | 5.499890398  | -0.335288023 |
| O | -4.570883330 | 4.114644296  | -0.206934017 |
| H | -3.721559270 | 3.735314269  | -0.022159001 |
| H | -5.433043389 | 5.893223424  | -0.554410040 |
| H | -3.780569275 | 5.781486414  | -1.146434083 |
| H | -4.094893295 | 5.967541431  | 0.580673043  |

Coord\_4

|   |              |              |              |
|---|--------------|--------------|--------------|
| C | -2.618406187 | -0.694505049 | 0.368365024  |
| C | -3.719548269 | -1.490280108 | 0.185195014  |
| C | -4.791942342 | -1.054136077 | -0.594116045 |
| C | -4.744316342 | 0.207376012  | -1.174892087 |
| C | -3.632147259 | 1.024847074  | -0.989255073 |
| C | -2.539052185 | 0.580185041  | -0.226416016 |
| C | 0.007439999  | 1.054645077  | -0.067453007 |
| C | 0.454881033  | -0.176005014 | -0.493506035 |
| C | 1.048407077  | 2.007674146  | 0.355925025  |
| C | 1.858544134  | -0.579651043 | -0.468415032 |

|   |              |              |              |
|---|--------------|--------------|--------------|
| C | 2.413617174  | 1.591580117  | 0.364456024  |
| C | 2.803816200  | 0.271851021  | -0.054809004 |
| H | -1.815581132 | -1.040364075 | 0.993169074  |
| H | -3.763652272 | -2.456717179 | 0.653932045  |
| H | -5.649126405 | -1.686233120 | -0.731075054 |
| H | -5.565369399 | 0.557648038  | -1.772807127 |
| H | -3.610948260 | 2.000144144  | -1.433192101 |
| C | -1.389511102 | 1.465517105  | -0.057469004 |
| O | -1.687307122 | 2.792954202  | -0.159492012 |
| H | 2.092775150  | -1.575432114 | -0.790299059 |
| H | 3.161811229  | 2.288938167  | 0.686099047  |
| O | 4.125329295  | 0.050945005  | 0.029132001  |
| C | 4.625988335  | -1.203938086 | -0.343259025 |
| H | 5.692839409  | -1.159186085 | -0.189160012 |
| H | 4.420235320  | -1.412972101 | -1.387489099 |
| H | 4.205496304  | -1.990935142 | 0.273257019  |
| H | -0.246151020 | -0.893682063 | -0.868209063 |
| O | 0.775741054  | 3.185284230  | 0.675079047  |
| H | -0.923805065 | 3.312522238  | 0.064557005  |
| C | 3.533398255  | 5.381255389  | 1.703782125  |
| O | 2.300052164  | 5.849713422  | 1.252245090  |
| H | 1.748392127  | 5.111370367  | 1.032145074  |
| H | 3.430345245  | 4.694776340  | 2.541817184  |
| H | 4.105245293  | 6.236659448  | 2.036715145  |
| H | 4.097426297  | 4.882484353  | 0.916954067  |
| C | -4.496720324 | 5.487194394  | -0.355241027 |
| O | -4.576310329 | 4.101773298  | -0.197740012 |
| H | -3.707653264 | 3.744870268  | -0.066502007 |
| H | -5.502428396 | 5.854260420  | -0.510952035 |
| H | -3.893027283 | 5.770115417  | -1.215438087 |
| H | -4.090558296 | 5.978101428  | 0.526399037  |

Coord\_5

|   |              |              |              |
|---|--------------|--------------|--------------|
| C | -2.605043186 | -0.684835049 | 0.362586028  |
| C | -3.705591267 | -1.482466107 | 0.198864016  |
| C | -4.794124346 | -1.049735074 | -0.563068041 |
| C | -4.760373342 | 0.211876014  | -1.143590083 |
| C | -3.648210260 | 1.033998073  | -0.976347069 |
| C | -2.539169181 | 0.592618045  | -0.233002019 |
| C | 0.012486001  | 1.056445078  | -0.082667006 |
| C | 0.465454032  | -0.156837013 | -0.536537041 |
| C | 1.040174074  | 1.998470145  | 0.388058028  |
| C | 1.869232133  | -0.562866038 | -0.493755034 |
| C | 2.404864175  | 1.584092116  | 0.415239032  |
| C | 2.804367200  | 0.276469019  | -0.035021003 |
| H | -1.789429129 | -1.029728073 | 0.971008067  |
| H | -3.738622267 | -2.449504176 | 0.667171049  |

|   |              |              |              |
|---|--------------|--------------|--------------|
| H | -5.650717408 | -1.685431120 | -0.686432048 |
| H | -5.592331404 | 0.558824039  | -1.728254122 |
| H | -3.637676262 | 2.008737147  | -1.421530103 |
| C | -1.390855101 | 1.476589107  | -0.088930004 |
| O | -1.665577120 | 2.801236201  | -0.273433018 |
| H | 2.110766150  | -1.549329113 | -0.837970060 |
| H | 3.146190229  | 2.270730162  | 0.773776055  |
| O | 4.123554297  | 0.053172005  | 0.070452002  |
| C | 4.632649333  | -1.191303085 | -0.325419026 |
| H | 5.695955411  | -1.150990082 | -0.147405011 |
| H | 4.449234318  | -1.371423098 | -1.379115097 |
| H | 4.199237301  | -1.994646146 | 0.260221018  |
| H | -0.229611019 | -0.864474061 | -0.941324065 |
| O | 0.754564052  | 3.168397226  | 0.724927052  |
| H | -0.909273064 | 3.320357241  | -0.024854000 |
| C | 3.547873253  | 5.341929386  | 1.690415123  |
| O | 2.292003167  | 5.823098421  | 1.322047093  |
| H | 1.724313122  | 5.091080367  | 1.121944082  |
| H | 3.493488252  | 4.650904334  | 2.529401182  |
| H | 4.146897300  | 6.190717443  | 1.990915145  |
| H | 4.055985294  | 4.843908347  | 0.865941062  |
| C | -4.522527325 | 5.485613397  | -0.368902028 |
| O | -4.571687330 | 4.102070293  | -0.184075015 |
| H | -3.691279266 | 3.757813272  | -0.110139010 |
| H | -5.541885397 | 5.837236418  | -0.456743033 |
| H | -3.986964288 | 5.761461416  | -1.275234089 |
| H | -4.060118290 | 5.996371431  | 0.472813035  |

Coord\_6

|   |              |              |              |
|---|--------------|--------------|--------------|
| C | -2.589018185 | -0.677264047 | 0.357587028  |
| C | -3.686205266 | -1.480371105 | 0.215045013  |
| C | -4.791752346 | -1.056202075 | -0.530402040 |
| C | -4.775587342 | 0.204121017  | -1.113483078 |
| C | -3.666294263 | 1.034645076  | -0.966522068 |
| C | -2.540399184 | 0.601802043  | -0.241818016 |
| C | 0.014299999  | 1.057684078  | -0.099181009 |
| C | 0.473343032  | -0.136777010 | -0.582241043 |
| C | 1.027903073  | 1.986175145  | 0.420148029  |
| C | 1.876690135  | -0.546282041 | -0.521822040 |
| C | 2.391464174  | 1.572331115  | 0.465982034  |
| C | 2.800734203  | 0.278391022  | -0.016658002 |
| H | -1.760024125 | -1.017230075 | 0.950356068  |
| H | -3.705374267 | -2.446902174 | 0.685069051  |
| H | -5.645596406 | -1.698304124 | -0.638779044 |
| H | -5.619182402 | 0.543788039  | -1.685645120 |
| H | -3.669376265 | 2.007696144  | -1.415141103 |
| C | -1.395328098 | 1.486001106  | -0.122798010 |

|   |              |              |              |
|---|--------------|--------------|--------------|
| O | -1.648808118 | 2.801483200  | -0.392017030 |
| H | 2.125831155  | -1.522266110 | -0.889516062 |
| H | 3.125200223  | 2.246220164  | 0.862361062  |
| O | 4.116996298  | 0.051418005  | 0.110535009  |
| C | 4.634779335  | -1.181500087 | -0.310141022 |
| H | 5.693939410  | -1.147019083 | -0.107802010 |
| H | 4.474397321  | -1.330613097 | -1.372365097 |
| H | 4.188512302  | -2.001101145 | 0.242300017  |
| H | -0.215180017 | -0.832632059 | -1.018410072 |
| O | 0.729334051  | 3.147581224  | 0.775863056  |
| H | -0.905376065 | 3.326564242  | -0.118039007 |
| C | 3.549378254  | 5.314844380  | 1.678657122  |
| O | 2.272342163  | 5.796573417  | 1.393270102  |
| H | 1.695510121  | 5.065621364  | 1.216061087  |
| H | 3.549467256  | 4.621271334  | 2.517424181  |
| H | 4.166079298  | 6.163114441  | 1.942656138  |
| H | 4.003631286  | 4.819681348  | 0.821689059  |
| C | -4.523987325 | 5.497578396  | -0.378054027 |
| O | -4.554915327 | 4.117455296  | -0.165418014 |
| H | -3.670691265 | 3.775275269  | -0.151773009 |
| H | -5.548209398 | 5.845662422  | -0.394359026 |
| H | -4.059840292 | 5.757897413  | -1.327310094 |
| H | -4.000469288 | 6.024234433  | 0.416725030  |

Coord\_7

|   |              |              |              |
|---|--------------|--------------|--------------|
| C | -2.570221185 | -0.672609049 | 0.353816026  |
| C | -3.661055265 | -1.484933105 | 0.234596017  |
| C | -4.784813346 | -1.074781075 | -0.494752036 |
| C | -4.790513347 | 0.182722015  | -1.083133080 |
| C | -3.687213264 | 1.025529072  | -0.958792069 |
| C | -2.543243184 | 0.606782045  | -0.252395021 |
| C | 0.012406000  | 1.057603077  | -0.117116006 |
| C | 0.478325035  | -0.116275011 | -0.630782043 |
| C | 1.010952075  | 1.970090141  | 0.451710034  |
| C | 1.880805133  | -0.530047036 | -0.553240039 |
| C | 2.372883173  | 1.555888112  | 0.515762040  |
| C | 2.792652200  | 0.277489019  | -0.000707002 |
| H | -1.726982123 | -1.003475071 | 0.931298067  |
| H | -3.663128264 | -2.449736178 | 0.708440053  |
| H | -5.633555407 | -1.726193125 | -0.586411044 |
| H | -5.646725406 | 0.510928037  | -1.643148117 |
| H | -3.707299266 | 1.995630146  | -1.412974101 |
| C | -1.403451101 | 1.492802108  | -0.158962009 |
| O | -1.637373116 | 2.792482202  | -0.514437038 |
| H | 2.138060155  | -1.494190109 | -0.945593071 |
| H | 3.098184221  | 2.215024160  | 0.950641067  |
| O | 4.105461298  | 0.045813002  | 0.147963012  |

|   |              |              |              |
|---|--------------|--------------|--------------|
| C | 4.632445335  | -1.174121086 | -0.298963021 |
| H | 5.686870411  | -1.146695083 | -0.072247003 |
| H | 4.495544323  | -1.290130095 | -1.368539098 |
| H | 4.173816298  | -2.009847143 | 0.217974014  |
| H | -0.202955017 | -0.798627060 | -1.099375080 |
| O | 0.699168053  | 3.121972225  | 0.827480058  |
| H | -0.913359064 | 3.330374238  | -0.214219015 |
| C | 3.535802254  | 5.301090381  | 1.670501120  |
| O | 2.238476163  | 5.769928416  | 1.467198105  |
| H | 1.660656121  | 5.034173360  | 1.313893096  |
| H | 3.596284261  | 4.606904330  | 2.506702183  |
| H | 4.159112299  | 6.155555440  | 1.896236138  |
| H | 3.939994282  | 4.811428347  | 0.785761057  |
| C | -4.497539321 | 5.525432398  | -0.384802027 |
| O | -4.523079326 | 4.150252300  | -0.141433008 |
| H | -3.643761260 | 3.798650272  | -0.190255012 |
| H | -5.516922397 | 5.883148423  | -0.326751023 |
| H | -4.108659296 | 5.761726412  | -1.373311097 |
| H | -3.907829280 | 6.062890435  | 0.354402027  |

Coord\_8

|   |              |              |              |
|---|--------------|--------------|--------------|
| C | -2.548617185 | -0.671693048 | 0.351860023  |
| C | -3.629779260 | -1.497074109 | 0.258567016  |
| C | -4.773240345 | -1.106739079 | -0.454398032 |
| C | -4.805727346 | 0.146211012  | -1.050644073 |
| C | -3.711913268 | 1.005293070  | -0.951762071 |
| C | -2.548366186 | 0.606544042  | -0.264021018 |
| C | 0.006128000  | 1.055506074  | -0.136521010 |
| C | 0.479971036  | -0.095646004 | -0.682330051 |
| C | 0.988528073  | 1.949598139  | 0.482287033  |
| C | 1.881321134  | -0.514062036 | -0.588772042 |
| C | 2.348500167  | 1.534539112  | 0.563556043  |
| C | 2.779769200  | 0.273900022  | 0.011661003  |
| H | -1.690017124 | -0.989043074 | 0.913938063  |
| H | -3.611015259 | -2.458779176 | 0.738208052  |
| H | -5.614247406 | -1.770454129 | -0.527230035 |
| H | -5.675759409 | 0.458521032  | -1.598348114 |
| H | -3.752878271 | 1.971002141  | -1.413487101 |
| C | -1.415984104 | 1.496022110  | -0.197099014 |
| O | -1.632020118 | 2.773052200  | -0.639597046 |
| H | 2.147406155  | -1.464752105 | -1.007056071 |
| H | 3.064441218  | 2.176953159  | 1.037267076  |
| O | 4.088726295  | 0.036842003  | 0.181011015  |
| C | 4.625701331  | -1.168326082 | -0.293820021 |
| H | 5.674871407  | -1.148943081 | -0.043126004 |
| H | 4.512360327  | -1.249075090 | -1.369339098 |
| H | 4.155718299  | -2.020051147 | 0.185339013  |

|   |              |              |              |
|---|--------------|--------------|--------------|
| H | -0.193275016 | -0.762802056 | -1.184096088 |
| O | 0.663010049  | 3.090724224  | 0.879488063  |
| H | -0.935204067 | 3.331094242  | -0.312667023 |
| C | 3.504699253  | 5.301343380  | 1.668337118  |
| O | 2.187797159  | 5.742616414  | 1.545566113  |
| H | 1.618191118  | 4.995953359  | 1.414961103  |
| H | 3.631216262  | 4.608529333  | 2.498400180  |
| H | 4.122278297  | 6.168920442  | 1.856747132  |
| H | 3.864231277  | 4.820588347  | 0.759766055  |
| C | -4.438719317 | 5.571174400  | -0.391899029 |
| O | -4.472282321 | 4.203036302  | -0.112343007 |
| H | -3.607890261 | 3.829529278  | -0.224691015 |
| H | -5.442060390 | 5.953057426  | -0.257889018 |
| H | -4.129755296 | 5.775098414  | -1.415175103 |
| H | -3.777893273 | 6.112439438  | 0.281386023  |

Coord\_9

|   |              |              |              |
|---|--------------|--------------|--------------|
| C | -2.524247181 | -0.675201049 | 0.352493025  |
| C | -3.591977261 | -1.517544108 | 0.288208022  |
| C | -4.756888345 | -1.153168085 | -0.407200030 |
| C | -4.821805349 | 0.093257007  | -1.013502075 |
| C | -3.741458271 | 0.972669070  | -0.943432069 |
| C | -2.556605185 | 0.600166044  | -0.275599020 |
| C | -0.005415002 | 1.050879076  | -0.157285009 |
| C | 0.477578033  | -0.074903008 | -0.737040052 |
| C | 0.959745069  | 1.924223137  | 0.511560039  |
| C | 1.877779134  | -0.497845035 | -0.629368044 |
| C | 2.317662167  | 1.508282109  | 0.608286046  |
| C | 2.761649198  | 0.268108018  | 0.019055001  |
| H | -1.648949117 | -0.974383070 | 0.898394064  |
| H | -3.548068255 | -2.474603180 | 0.775344055  |
| H | -5.587158400 | -1.832230133 | -0.458709033 |
| H | -5.707054412 | 0.384989027  | -1.548044112 |
| H | -3.807732276 | 1.932338139  | -1.414376103 |
| C | -1.433942104 | 1.494811109  | -0.236519015 |
| O | -1.633913117 | 2.742240198  | -0.765900056 |
| H | 2.153576156  | -1.433124102 | -1.075062079 |
| H | 3.023335216  | 2.132014151  | 1.120808082  |
| O | 4.066563294  | 0.025399000  | 0.207568014  |
| C | 4.614559334  | -1.162742082 | -0.297209020 |
| H | 5.658095409  | -1.152127083 | -0.023502000 |
| H | 4.524313325  | -1.205898085 | -1.377032097 |
| H | 4.134821295  | -2.030411146 | 0.141913008  |
| H | -0.186839014 | -0.725167050 | -1.272417094 |
| O | 0.619722043  | 3.053032220  | 0.931888068  |
| H | -0.973608069 | 3.328122240  | -0.412663029 |
| C | 3.453375251  | 5.315658382  | 1.675145121  |

|   |              |             |              |
|---|--------------|-------------|--------------|
| O | 2.117901153  | 5.713610410 | 1.630749118  |
| H | 1.566482113  | 4.950188359 | 1.519160110  |
| H | 3.650931263  | 4.626290331 | 2.494271179  |
| H | 4.051994292  | 6.202912444 | 1.830188134  |
| H | 3.774869274  | 4.848338349 | 0.745555053  |
| C | -4.342271313 | 5.635944404 | -0.403140029 |
| O | -4.397588317 | 4.278249306 | -0.079413005 |
| H | -3.559955258 | 3.869552276 | -0.254611019 |
| H | -5.316263385 | 6.057722437 | -0.193511013 |
| H | -4.118726295 | 5.799749417 | -1.455404104 |
| H | -3.606268259 | 6.171250446 | 0.192387014  |

Coord\_10

|   |              |              |              |
|---|--------------|--------------|--------------|
| C | -2.587998186 | -0.590960042 | 0.332717026  |
| C | -3.639730263 | -1.452526105 | 0.343815026  |
| C | -4.823980347 | -1.156304085 | -0.355040024 |
| C | -4.921975353 | 0.045266002  | -1.041327077 |
| C | -3.857878277 | 0.947642066  | -1.048952077 |
| C | -2.653758191 | 0.641994044  | -0.379545026 |
| C | -0.107633007 | 1.098730077  | -0.285974021 |
| C | 0.386298026  | -0.031917003 | -0.837489059 |
| C | 0.837778059  | 1.985693144  | 0.388810026  |
| C | 1.784094128  | -0.454196034 | -0.688140052 |
| C | 2.192360160  | 1.573430115  | 0.527966036  |
| C | 2.650684189  | 0.323067023  | -0.030117001 |
| H | -1.697698121 | -0.839067060 | 0.879797066  |
| H | -3.570290259 | -2.374280169 | 0.892125065  |
| H | -5.641459404 | -1.852586132 | -0.347591023 |
| H | -5.820845417 | 0.283978023  | -1.579468112 |
| H | -3.950017286 | 1.871328135  | -1.582938113 |
| C | -1.541429111 | 1.540555111  | -0.414681030 |
| O | -1.721796123 | 2.715771197  | -1.097087076 |
| H | 2.070795149  | -1.397205101 | -1.109886080 |
| H | 2.885694208  | 2.204798159  | 1.047951074  |
| O | 3.950085285  | 0.084116005  | 0.195062015  |
| C | 4.510251323  | -1.113295082 | -0.273703020 |
| H | 5.546573399  | -1.097543079 | 0.025960002  |
| H | 4.447123319  | -1.176253083 | -1.354439096 |
| H | 4.019093290  | -1.972554144 | 0.169211014  |
| H | -0.267275019 | -0.692901049 | -1.373826097 |
| O | 0.482637036  | 3.123937225  | 0.770030057  |
| H | -1.109442079 | 3.355967240  | -0.751548054 |
| C | 3.295239234  | 5.489293396  | 1.362540096  |
| O | 1.943695140  | 5.831201421  | 1.368208098  |
| H | 1.419580101  | 5.042773364  | 1.310497096  |
| H | 3.562500257  | 4.850640350  | 2.202868159  |
| H | 3.862678279  | 6.406412460  | 1.443278103  |

|   |              |             |              |
|---|--------------|-------------|--------------|
| H | 3.589487260  | 4.988850361 | 0.441203034  |
| C | -4.275253306 | 5.761686417 | -0.811152061 |
| O | -4.370696313 | 4.443316317 | -0.359280025 |
| H | -3.573729255 | 3.971995287 | -0.564273041 |
| H | -5.204299374 | 6.256419450 | -0.560900039 |
| H | -4.137820296 | 5.818736418 | -1.889043137 |
| H | -3.463238247 | 6.303387455 | -0.331540024 |

Coord\_11

|   |              |              |              |
|---|--------------|--------------|--------------|
| C | -2.611579187 | -0.592189041 | 0.336549026  |
| C | -3.676721266 | -1.441516102 | 0.323181024  |
| C | -4.841595350 | -1.124817081 | -0.393568028 |
| C | -4.911619354 | 0.081883004  | -1.075412077 |
| C | -3.835392276 | 0.968620070  | -1.058799076 |
| C | -2.649933192 | 0.642376047  | -0.368614029 |
| C | -0.101462006 | 1.096491080  | -0.273698019 |
| C | 0.392771028  | -0.057768005 | -0.796980059 |
| C | 0.850429062  | 2.013057143  | 0.354821024  |
| C | 1.782019129  | -0.459385035 | -0.662192047 |
| C | 2.212512161  | 1.610733116  | 0.482461037  |
| C | 2.663798191  | 0.353198027  | -0.039131001 |
| H | -1.735218127 | -0.853865063 | 0.899702063  |
| H | -3.629241261 | -2.367010168 | 0.867535061  |
| H | -5.669277406 | -1.808964131 | -0.404023030 |
| H | -5.797855417 | 0.336548025  | -1.626937116 |
| H | -3.905542282 | 1.897636134  | -1.587219114 |
| C | -1.524986108 | 1.535531113  | -0.378495027 |
| O | -1.718590123 | 2.751796198  | -0.970788072 |
| H | 2.073475151  | -1.410607102 | -1.061575076 |
| H | 2.910159210  | 2.264319164  | 0.968177070  |
| O | 3.968329284  | 0.118495010  | 0.163036013  |
| C | 4.521409327  | -1.092893077 | -0.277184022 |
| H | 5.562937401  | -1.065709077 | 0.003043002  |
| H | 4.440095321  | -1.191469088 | -1.354029095 |
| H | 4.041360290  | -1.938726139 | 0.202210015  |
| H | -0.266976018 | -0.736319053 | -1.302413093 |
| O | 0.496935035  | 3.156924229  | 0.713071053  |
| H | -1.080094078 | 3.381214244  | -0.651079049 |
| C | 3.317040236  | 5.448778390  | 1.358767099  |
| O | 1.982724142  | 5.845184422  | 1.283266090  |
| H | 1.430466103  | 5.078084367  | 1.202449087  |
| H | 3.506024254  | 4.797946345  | 2.210785159  |
| H | 3.915454280  | 6.341754457  | 1.478118106  |
| H | 3.646800262  | 4.938421357  | 0.455067034  |
| C | -4.325042313 | 5.734516414  | -0.813923060 |
| O | -4.437506321 | 4.414060319  | -0.371919026 |
| H | -3.622891261 | 3.952172286  | -0.521417039 |



|   |              |             |              |
|---|--------------|-------------|--------------|
| H | -5.273900380 | 6.219326448 | -0.626738044 |
| H | -4.114880299 | 5.795489418 | -1.879791135 |
| H | -3.553116256 | 6.282935453 | -0.278993020 |

Coord\_12

|   |              |              |              |
|---|--------------|--------------|--------------|
| C | -2.634034188 | -0.594066043 | 0.344789024  |
| C | -3.711690267 | -1.431291101 | 0.308918020  |
| C | -4.857213350 | -1.096071077 | -0.425068028 |
| C | -4.900173351 | 0.114156011  | -1.104056081 |
| C | -3.812780273 | 0.985436069  | -1.065358074 |
| C | -2.646027191 | 0.640428045  | -0.355125026 |
| C | -0.096479009 | 1.092918080  | -0.259802020 |
| C | 0.396866030  | -0.084714007 | -0.754926052 |
| C | 0.862860060  | 2.036300148  | 0.320171021  |
| C | 1.776797128  | -0.467971031 | -0.637170043 |
| C | 2.231863162  | 1.641873117  | 0.433852032  |
| C | 2.674707191  | 0.378003025  | -0.051968005 |
| H | -1.771641127 | -0.867823060 | 0.923666066  |
| H | -3.685458263 | -2.359223171 | 0.850569061  |
| H | -5.694375409 | -1.768201126 | -0.451805032 |
| H | -5.773810418 | 0.383356029  | -1.668538121 |
| H | -3.861686278 | 1.918490137  | -1.589408114 |
| C | -1.509263109 | 1.528314109  | -0.341496023 |
| O | -1.716834123 | 2.778388201  | -0.841607058 |
| H | 2.071791150  | -1.426898104 | -1.014871072 |
| H | 2.934506211  | 2.315573166  | 0.883641062  |
| O | 3.983729284  | 0.145098010  | 0.125474011  |
| C | 4.528392323  | -1.079917079 | -0.286429018 |
| H | 5.575114399  | -1.043119078 | -0.027395003 |
| H | 4.427554318  | -1.213760087 | -1.357797096 |
| H | 4.059802292  | -1.910663139 | 0.229271017  |
| H | -0.269870020 | -0.779095059 | -1.228110088 |
| O | 0.512447035  | 3.185563228  | 0.655924048  |
| H | -1.054488075 | 3.396924247  | -0.547327039 |
| C | 3.327105241  | 5.426904388  | 1.363050096  |
| O | 2.011714144  | 5.859430424  | 1.203297088  |
| H | 1.443760104  | 5.107337370  | 1.093470081  |
| H | 3.442285246  | 4.766569341  | 2.220784159  |
| H | 3.940310286  | 6.302591456  | 1.527488111  |
| H | 3.701718266  | 4.912395356  | 0.479408033  |
| C | -4.358927315 | 5.709480409  | -0.811056057 |
| O | -4.492804323 | 4.381999316  | -0.396677029 |
| H | -3.661923264 | 3.932347285  | -0.478561032 |
| H | -5.326403384 | 6.180957446  | -0.701489051 |
| H | -4.057329293 | 5.786869417  | -1.853638131 |
| H | -3.643420264 | 6.259303450  | -0.204034015 |

## Coord\_13

|   |              |              |              |
|---|--------------|--------------|--------------|
| C | -2.654551189 | -0.597220045 | 0.355822026  |
| C | -3.743648271 | -1.422881104 | 0.298752022  |
| C | -4.869575349 | -1.071431076 | -0.452570031 |
| C | -4.886298350 | 0.140774013  | -1.130345083 |
| C | -3.788883274 | 0.997179073  | -1.071047079 |
| C | -2.641115188 | 0.635580046  | -0.340757027 |
| C | -0.091973006 | 1.087932077  | -0.244658015 |
| C | 0.399229028  | -0.112914010 | -0.711719052 |
| C | 0.875679061  | 2.054864146  | 0.285303019  |
| C | 1.768877128  | -0.480571033 | -0.612652044 |
| C | 2.250799161  | 1.665765121  | 0.383291030  |
| C | 2.683747194  | 0.396345028  | -0.067511005 |
| H | -1.806384132 | -0.881291066 | 0.950644067  |
| H | -3.738030271 | -2.351987170 | 0.839012063  |
| H | -5.715352414 | -1.731966126 | -0.494487034 |
| H | -5.747165412 | 0.422837033  | -1.707927123 |
| H | -3.817229272 | 1.933029139  | -1.591990113 |
| C | -1.493549106 | 1.518750108  | -0.304609025 |
| O | -1.716004124 | 2.795409203  | -0.710641050 |
| H | 2.066128150  | -1.446755104 | -0.969432072 |
| H | 2.959026215  | 2.357125169  | 0.796094058  |
| O | 3.996376287  | 0.162336012  | 0.084244007  |
| C | 4.531184326  | -1.076013079 | -0.299533024 |
| H | 5.582912403  | -1.031828075 | -0.062822002 |
| H | 4.409981315  | -1.244405091 | -1.363887096 |
| H | 4.074000292  | -1.890053136 | 0.251780016  |
| H | -0.275209021 | -0.821047062 | -1.151871082 |
| O | 0.529904037  | 3.209336230  | 0.599086046  |
| H | -1.031873077 | 3.402985247  | -0.441310034 |
| C | 3.327415238  | 5.424063389  | 1.372191098  |
| O | 2.031602144  | 5.874277423  | 1.125916081  |
| H | 1.460394103  | 5.129670369  | 0.985031069  |
| H | 3.375324242  | 4.757457343  | 2.231348161  |
| H | 3.939251286  | 6.290662452  | 1.583580116  |
| H | 3.754994271  | 4.909392354  | 0.513018039  |
| C | -4.378436313 | 5.686439407  | -0.802545056 |
| O | -4.532981327 | 4.348850315  | -0.429675030 |
| H | -3.691076263 | 3.912523284  | -0.435705031 |
| H | -5.358796387 | 6.143174444  | -0.780470057 |
| H | -3.975969286 | 5.789482415  | -1.808178128 |
| H | -3.734815271 | 6.232223450  | -0.116582008 |

## Coord\_14

|   |              |              |              |
|---|--------------|--------------|--------------|
| C | -2.672414192 | -0.601910042 | 0.367868026  |
| C | -3.771589269 | -1.417032102 | 0.290160020  |
| C | -4.877414353 | -1.051978076 | -0.479252032 |

|   |              |              |              |
|---|--------------|--------------|--------------|
| C | -4.868765348 | 0.160794010  | -1.157331086 |
| C | -3.762756269 | 1.003389074  | -1.078153077 |
| C | -2.634482190 | 0.627718043  | -0.327157024 |
| C | -0.087511005 | 1.082129077  | -0.228600015 |
| C | 0.400105028  | -0.141878009 | -0.667792049 |
| C | 0.889371062  | 2.068863149  | 0.250752021  |
| C | 1.758346125  | -0.497135037 | -0.588304043 |
| C | 2.269587166  | 1.681976122  | 0.332005023  |
| C | 2.691026191  | 0.407734028  | -0.084644007 |
| H | -1.838950134 | -0.894257062 | 0.979345070  |
| H | -3.785944271 | -2.346157171 | 0.830244062  |
| H | -5.730723415 | -1.701710121 | -0.535839040 |
| H | -5.716496410 | 0.453795034  | -1.748647127 |
| H | -3.771261269 | 1.940905138  | -1.597174113 |
| C | -1.477470108 | 1.507234111  | -0.268648017 |
| O | -1.716233126 | 2.803126200  | -0.578846043 |
| H | 2.056430146  | -1.470202107 | -0.925041064 |
| H | 2.984010213  | 2.388187170  | 0.707398050  |
| O | 4.006166289  | 0.169262010  | 0.041186003  |
| C | 4.529478327  | -1.082190075 | -0.314702022 |
| H | 5.585893401  | -1.033266072 | -0.100815008 |
| H | 4.387493314  | -1.283981093 | -1.370638101 |
| H | 4.083180295  | -1.878007135 | 0.271030019  |
| H | -0.282747019 | -0.861333061 | -1.074727078 |
| O | 0.549994039  | 3.228404233  | 0.543203039  |
| H | -1.012227075 | 3.399813242  | -0.334100025 |
| C | 3.320203240  | 5.439712393  | 1.383120101  |
| O | 2.044367148  | 5.889866424  | 1.048864074  |
| H | 1.481401106  | 5.144912368  | 0.878805065  |
| H | 3.308696238  | 4.770699342  | 2.241551159  |
| H | 3.915748280  | 6.305839456  | 1.638680120  |
| H | 3.806602276  | 4.927309354  | 0.554406039  |
| C | -4.385848314 | 5.665123407  | -0.788549059 |
| O | -4.556490328 | 4.316472308  | -0.465591036 |
| H | -3.711320267 | 3.892698282  | -0.392848029 |
| H | -5.370374388 | 6.107898441  | -0.857501061 |
| H | -3.883068278 | 5.798925419  | -1.744150125 |
| H | -3.825473277 | 6.201794446  | -0.026587003 |

Coord\_15

|   |              |              |              |
|---|--------------|--------------|--------------|
| C | -2.687078196 | -0.607951045 | 0.379132030  |
| C | -3.794556271 | -1.414167099 | 0.280555019  |
| C | -4.879544350 | -1.038497074 | -0.508230037 |
| C | -4.846574347 | 0.173647011  | -1.187852087 |
| C | -3.733805267 | 1.004097071  | -1.088707078 |
| C | -2.625739187 | 0.617255045  | -0.315825021 |
| C | -0.083083008 | 1.076918078  | -0.211882015 |

|   |              |              |              |
|---|--------------|--------------|--------------|
| C | 0.399167030  | -0.170352010 | -0.623563044 |
| C | 0.904164064  | 2.079224149  | 0.217137015  |
| C | 1.744755123  | -0.516848038 | -0.563856039 |
| C | 2.288257163  | 1.690851123  | 0.281252019  |
| C | 2.696270195  | 0.412431032  | -0.102284009 |
| H | -1.868999136 | -0.906246064 | 1.008367071  |
| H | -3.828116274 | -2.342325166 | 0.821465059  |
| H | -5.738991412 | -1.678680120 | -0.579605041 |
| H | -5.680637407 | 0.475379037  | -1.793945128 |
| H | -3.723343269 | 1.942318141  | -1.606793116 |
| C | -1.461127103 | 1.494813109  | -0.234256015 |
| O | -1.718497126 | 2.802271203  | -0.447043034 |
| H | 2.042008145  | -1.496514107 | -0.881571064 |
| H | 3.009628218  | 2.408751172  | 0.619449046  |
| O | 4.012649287  | 0.165672014  | -0.001954998 |
| C | 4.522487324  | -1.098735077 | -0.330310026 |
| H | 5.583189401  | -1.048155077 | -0.139154010 |
| H | 4.359618315  | -1.332309094 | -1.376629102 |
| H | 4.086050293  | -1.874955137 | 0.288200021  |
| H | -0.292924024 | -0.898345067 | -0.997706070 |
| O | 0.573260042  | 3.243751235  | 0.489053035  |
| H | -0.996499070 | 3.388474244  | -0.226851016 |
| C | 3.307924238  | 5.472514392  | 1.392979102  |
| O | 2.052955150  | 5.906274427  | 0.970214069  |
| H | 1.507836108  | 5.153728371  | 0.776573058  |
| H | 3.245096235  | 4.805825344  | 2.250888164  |
| H | 3.874683279  | 6.346272456  | 1.685602124  |
| H | 3.856073279  | 4.963282358  | 0.601680041  |
| C | -4.384154317 | 5.645236407  | -0.769467054 |
| O | -4.564842327 | 4.286387306  | -0.498572034 |
| H | -3.724554270 | 3.872874276  | -0.349992027 |
| H | -5.363628384 | 6.076640439  | -0.926041067 |
| H | -3.790266273 | 5.810486418  | -1.666028122 |
| H | -3.911401280 | 6.168965443  | 0.058047003  |

Coord\_16

|   |              |              |              |
|---|--------------|--------------|--------------|
| C | -2.698113193 | -0.614626045 | 0.388031029  |
| C | -3.811551274 | -1.414331102 | 0.267573020  |
| C | -4.874798349 | -1.031478072 | -0.542271042 |
| C | -4.818948348 | 0.179130013  | -1.224296091 |
| C | -3.701811264 | 0.999857070  | -1.104308081 |
| C | -2.614819191 | 0.605214045  | -0.307951022 |
| C | -0.079153005 | 1.074690078  | -0.194582015 |
| C | 0.395407030  | -0.196185014 | -0.579329044 |
| C | 0.920022067  | 2.087817151  | 0.185189013  |
| C | 1.726979123  | -0.538040037 | -0.539035038 |
| C | 2.306545164  | 1.693583122  | 0.232300017  |

|   |              |              |              |
|---|--------------|--------------|--------------|
| C | 2.698730192  | 0.411511031  | -0.119369010 |
| H | -1.896269137 | -0.916190067 | 1.036420075  |
| H | -3.863266280 | -2.340771168 | 0.810015060  |
| H | -5.738562414 | -1.663954118 | -0.629168047 |
| H | -5.638691405 | 0.487035033  | -1.846528132 |
| H | -3.673578266 | 1.938044141  | -1.622170118 |
| C | -1.445133102 | 1.483318109  | -0.201791012 |
| O | -1.724705126 | 2.794127203  | -0.315881024 |
| H | 2.021360146  | -1.524148108 | -0.838905058 |
| H | 3.035918220  | 2.419631173  | 0.534105038  |
| O | 4.014895290  | 0.152113011  | -0.043569004 |
| C | 4.508761324  | -1.125222081 | -0.344931024 |
| H | 5.573318404  | -1.076555079 | -0.175894014 |
| H | 4.325071312  | -1.388482101 | -1.380693098 |
| H | 4.080621295  | -1.880624134 | 0.304360020  |
| H | -0.307006023 | -0.929544067 | -0.921668068 |
| O | 0.600131044  | 3.257331236  | 0.437556029  |
| H | -0.986754070 | 3.370844243  | -0.120776007 |
| C | 3.293528235  | 5.520428397  | 1.399244100  |
| O | 2.061373148  | 5.923676426  | 0.888570063  |
| H | 1.540878110  | 5.157718372  | 0.680161049  |
| H | 3.186439228  | 4.861995350  | 2.259042161  |
| H | 3.822597273  | 6.408580463  | 1.718158124  |
| H | 3.903161281  | 5.013538363  | 0.652657045  |
| C | -4.377030316 | 5.626515407  | -0.745948052 |
| O | -4.562587329 | 4.259385307  | -0.524030037 |
| H | -3.733752270 | 3.853049275  | -0.307136021 |
| H | -5.344025383 | 6.050091436  | -0.981305068 |
| H | -3.706217268 | 5.820317420  | -1.580364115 |
| H | -3.988889286 | 6.135319443  | 0.133244011  |

Coord\_17

|   |              |              |              |
|---|--------------|--------------|--------------|
| C | -2.704969197 | -0.620541045 | 0.393497028  |
| C | -3.821233276 | -1.417142102 | 0.249447017  |
| C | -4.861746351 | -1.031153073 | -0.583429040 |
| C | -4.785149347 | 0.177365011  | -1.268304090 |
| C | -3.666808263 | 0.991786069  | -1.125886082 |
| C | -2.601827185 | 0.593356040  | -0.304165024 |
| C | -0.076605006 | 1.079079079  | -0.176437014 |
| C | 0.387055030  | -0.216114015 | -0.535100039 |
| C | 0.936764066  | 2.097611153  | 0.155832010  |
| C | 1.703093120  | -0.558079042 | -0.513466035 |
| C | 2.323967166  | 1.692259121  | 0.186437014  |
| C | 2.697130193  | 0.406872030  | -0.134851011 |
| H | -1.920318137 | -0.922225069 | 1.062637077  |
| H | -3.889541280 | -2.341393169 | 0.793801058  |
| H | -5.727416411 | -1.658539121 | -0.687137049 |

|   |              |              |              |
|---|--------------|--------------|--------------|
| H | -5.589866401 | 0.488393035  | -1.908264136 |
| H | -3.622555260 | 1.929464140  | -1.643925119 |
| C | -1.430542103 | 1.475568107  | -0.171147014 |
| O | -1.737705128 | 2.780676199  | -0.185754015 |
| H | 1.991956142  | -1.550648114 | -0.796835059 |
| H | 3.062895221  | 2.422434172  | 0.453133034  |
| O | 4.011398290  | 0.129794008  | -0.082242008 |
| C | 4.485967321  | -1.160640084 | -0.357383025 |
| H | 5.553943399  | -1.118084078 | -0.209479016 |
| H | 4.281457306  | -1.450991105 | -1.381935098 |
| H | 4.063992291  | -1.894092134 | 0.320454025  |
| H | -0.327215022 | -0.951182066 | -0.847090059 |
| O | 0.631165046  | 3.272239233  | 0.389845028  |
| H | -0.986254071 | 3.349846241  | -0.017088001 |
| C | 3.281148234  | 5.580719403  | 1.399982101  |
| O | 2.075084152  | 5.942512427  | 0.803307056  |
| H | 1.582201112  | 5.159491370  | 0.591413044  |
| H | 3.134508228  | 4.938006355  | 2.265724161  |
| H | 3.768338269  | 6.488010465  | 1.731706126  |
| H | 3.948803284  | 5.073136364  | 0.705262053  |
| C | -4.368912313 | 5.608752403  | -0.718820050 |
| O | -4.556127329 | 4.235407307  | -0.540445041 |
| H | -3.743066271 | 3.833225274  | -0.264280019 |
| H | -5.318596384 | 6.027998434  | -1.022329074 |
| H | -3.635525262 | 5.826594420  | -1.492420106 |
| H | -4.058181290 | 6.102187439  | 0.199018012  |

Coord\_18

|   |              |              |              |
|---|--------------|--------------|--------------|
| C | -2.706493196 | -0.623340044 | 0.395411030  |
| C | -3.821293274 | -1.421663102 | 0.225492014  |
| C | -4.838128350 | -1.037541073 | -0.632565048 |
| C | -4.744106344 | 0.168739014  | -1.320369093 |
| C | -3.628858259 | 0.981673069  | -1.153369083 |
| C | -2.586756186 | 0.584471043  | -0.304199023 |
| C | -0.076662003 | 1.095554076  | -0.156601011 |
| C | 0.371385028  | -0.225262018 | -0.490381037 |
| C | 0.954320071  | 2.113031151  | 0.130313009  |
| C | 1.670072121  | -0.573093039 | -0.486559033 |
| C | 2.339933168  | 1.689932122  | 0.144973013  |
| C | 2.689541193  | 0.401291031  | -0.147690010 |
| H | -1.940011140 | -0.921273068 | 1.087016077  |
| H | -3.903736280 | -2.343590170 | 0.771843055  |
| H | -5.702425413 | -1.663550117 | -0.754818052 |
| H | -5.533152401 | 0.479075033  | -1.979806143 |
| H | -3.571288256 | 1.918667136  | -1.671717121 |
| C | -1.418737101 | 1.475832108  | -0.141480009 |
| O | -1.761345126 | 2.764939198  | -0.056627003 |

|   |              |              |              |
|---|--------------|--------------|--------------|
| H | 1.949737138  | -1.572404115 | -0.754966053 |
| H | 3.090799224  | 2.419463175  | 0.378134028  |
| O | 3.999832286  | 0.100389009  | -0.116867007 |
| C | 4.450403318  | -1.203627089 | -0.366864024 |
| H | 5.521365395  | -1.172357084 | -0.238968016 |
| H | 4.224640301  | -1.517911108 | -1.379818098 |
| H | 4.031825289  | -1.913932137 | 0.337195024  |
| H | -0.357054025 | -0.957632070 | -0.773765053 |
| O | 0.667536049  | 3.293091235  | 0.347413024  |
| H | -0.999682071 | 3.329961242  | 0.083172005  |
| C | 3.277292236  | 5.649891405  | 1.394275099  |
| O | 2.101896150  | 5.963683427  | 0.714893052  |
| H | 1.634787117  | 5.162801374  | 0.512241037  |
| H | 3.092310221  | 5.032128360  | 2.270682166  |
| H | 3.724300270  | 6.578479475  | 1.723848124  |
| H | 3.996380288  | 5.135680368  | 0.758183053  |
| C | -4.365472312 | 5.591733401  | -0.689012051 |
| O | -4.552079329 | 4.213609305  | -0.550743042 |
| H | -3.758080268 | 3.813400273  | -0.221424017 |
| H | -5.294219379 | 6.009151432  | -1.053527073 |
| H | -3.579296258 | 5.830471421  | -1.402222103 |
| H | -4.127625294 | 6.069428435  | 0.258428017  |

Coord\_19

|   |              |              |              |
|---|--------------|--------------|--------------|
| C | -2.611519188 | -0.702909050 | 0.416026030  |
| C | -3.722309267 | -1.494049109 | 0.177638013  |
| C | -4.717291340 | -1.066234074 | -0.680956047 |
| C | -4.610116330 | 0.174598012  | -1.303421096 |
| C | -3.500459252 | 0.977342070  | -1.068714079 |
| C | -2.479381179 | 0.536197039  | -0.217655016 |
| C | 0.011367002  | 1.067394078  | -0.025149001 |
| C | 0.430194031  | -0.263202021 | -0.412811029 |
| C | 1.069974077  | 2.056642150  | 0.269899019  |
| C | 1.707696121  | -0.627418047 | -0.452347031 |
| C | 2.449073177  | 1.602946114  | 0.237246015  |
| C | 2.762397200  | 0.326607023  | -0.102378007 |
| H | -1.861971133 | -1.034032072 | 1.111184078  |
| H | -3.815631273 | -2.442894175 | 0.673873047  |
| H | -5.578295400 | -1.684541124 | -0.855018061 |
| H | -5.384957386 | 0.519255038  | -1.962581143 |
| H | -3.432964249 | 1.941186141  | -1.534327113 |
| C | -1.317771092 | 1.427928105  | 0.023350999  |
| O | -1.702131123 | 2.677761194  | 0.278511019  |
| H | 1.967895141  | -1.619117115 | -0.764833054 |
| H | 3.219111229  | 2.310687166  | 0.475157036  |
| O | 4.064676295  | -0.010627001 | -0.116938007 |
| C | 4.478374320  | -1.315829096 | -0.418769030 |

|   |              |              |              |
|---|--------------|--------------|--------------|
| H | 5.552343400  | -1.312456094 | -0.314319025 |
| H | 4.224321303  | -1.592607112 | -1.435949104 |
| H | 4.060354293  | -2.039750145 | 0.271593021  |
| H | -0.319766021 | -0.969083069 | -0.706132052 |
| O | 0.813908058  | 3.230410232  | 0.539201041  |
| H | -0.932742065 | 3.234980234  | 0.413852032  |
| C | 3.407998244  | 5.554712399  | 1.730660122  |
| O | 2.266502163  | 5.865824420  | 0.994396072  |
| H | 1.813629130  | 5.062804363  | 0.770384055  |
| H | 3.183386230  | 4.924698356  | 2.588815188  |
| H | 3.828472278  | 6.483168467  | 2.094007149  |
| H | 4.164198300  | 5.054511362  | 1.127197082  |
| C | -4.269606307 | 5.545711401  | -0.280331018 |
| O | -4.454673318 | 4.160483302  | -0.263649017 |
| H | -3.685316264 | 3.738294267  | 0.095327006  |
| H | -5.171266374 | 5.988058432  | -0.681470048 |
| H | -3.433295245 | 5.840904420  | -0.910528066 |
| H | -4.108574294 | 5.948627430  | 0.716704050  |

LIIC path connecting S1-PP-KETO and S0-KETO

Coord\_1

|   |              |              |              |
|---|--------------|--------------|--------------|
| C | -2.635786188 | -0.672508050 | 0.206697014  |
| C | -3.774533273 | -1.510265111 | 0.024553004  |
| C | -4.920704354 | -1.053976075 | -0.558274039 |
| C | -4.997388361 | 0.296223020  | -0.945500068 |
| C | -3.877278280 | 1.194591086  | -0.770671054 |
| C | -2.598325186 | 0.699614049  | -0.306705022 |
| C | -0.117274008 | 1.148232084  | -0.142768011 |
| C | 0.331478026  | -0.191503013 | -0.389666028 |
| C | 0.924319066  | 2.154810155  | 0.134237012  |
| C | 1.644304121  | -0.562960041 | -0.305476023 |
| C | 2.298672165  | 1.703757121  | 0.264803021  |
| C | 2.648913192  | 0.410289029  | 0.047887001  |
| H | -1.836832134 | -1.028998073 | 0.823261060  |
| H | -3.720110266 | -2.520688184 | 0.384840027  |
| H | -5.765215415 | -1.701971121 | -0.691515049 |
| H | -5.896692424 | 0.685371047  | -1.380154099 |
| H | -4.007025286 | 2.229213159  | -1.000284074 |
| C | -1.479189108 | 1.544761112  | -0.260761017 |
| O | -1.784070130 | 2.865855205  | -0.394693027 |
| H | 1.919123138  | -1.571076113 | -0.542699040 |
| H | 3.038310218  | 2.443452177  | 0.503044037  |
| O | 3.955194285  | 0.093156008  | 0.164223010  |
| C | 4.399741317  | -1.216021087 | -0.054307006 |
| H | 5.462319396  | -1.201911089 | 0.135099010  |
| H | 4.228593303  | -1.533498109 | -1.077625075 |
| H | 3.932161284  | -1.920182139 | 0.625678044  |



|   |              |              |              |
|---|--------------|--------------|--------------|
| H | -0.372779024 | -0.925755067 | -0.720476052 |
| O | 0.658249046  | 3.346554240  | 0.262067021  |
| H | -0.987026072 | 3.376814241  | -0.237622016 |
| C | 2.656111193  | 6.005083435  | 1.829757129  |
| O | 2.923659210  | 5.194923375  | 0.727122053  |
| H | 2.142245153  | 4.699605336  | 0.505378037  |
| H | 1.914941135  | 6.770430490  | 1.605878116  |
| H | 3.577790257  | 6.499892468  | 2.107922151  |
| H | 2.305170166  | 5.431832388  | 2.685268193  |
| C | -4.244869303 | 5.779828417  | -0.693238050 |
| O | -4.353598315 | 4.523321324  | -0.089960005 |
| H | -3.493088252 | 4.129923300  | -0.009919999 |
| H | -5.244085375 | 6.184853445  | -0.781812056 |
| H | -3.808767273 | 5.720562412  | -1.687925122 |
| H | -3.651505261 | 6.468444464  | -0.096766008 |

Coord\_2

|   |              |              |              |
|---|--------------|--------------|--------------|
| C | -2.649780190 | -0.648875047 | 0.258594020  |
| C | -3.797312274 | -1.477166106 | 0.132538009  |
| C | -4.948778355 | -1.025574074 | -0.448588031 |
| C | -5.012203360 | 0.306826023  | -0.890629065 |
| C | -3.884519282 | 1.191315087  | -0.773722058 |
| C | -2.611121189 | 0.698951048  | -0.299535019 |
| C | -0.108661008 | 1.109955080  | -0.183431012 |
| C | 0.359225027  | -0.211934017 | -0.446199034 |
| C | 0.902206066  | 2.123633153  | 0.136542007  |
| C | 1.684902123  | -0.559285043 | -0.349810027 |
| C | 2.280086164  | 1.707163123  | 0.277768022  |
| C | 2.659316192  | 0.421279029  | 0.033598003  |
| H | -1.832895134 | -0.996621072 | 0.857069062  |
| H | -3.749069269 | -2.474908176 | 0.527324039  |
| H | -5.804016416 | -1.666632120 | -0.541931040 |
| H | -5.913227424 | 0.689379052  | -1.328114094 |
| H | -4.004705288 | 2.214833159  | -1.057385077 |
| C | -1.473028104 | 1.526611111  | -0.302948022 |
| O | -1.733500126 | 2.843530206  | -0.529960040 |
| H | 1.981363141  | -1.559238111 | -0.596165046 |
| H | 3.002480214  | 2.452502177  | 0.548724041  |
| O | 3.971378287  | 0.133666008  | 0.161943013  |
| C | 4.446183320  | -1.162500084 | -0.068947006 |
| H | 5.506200398  | -1.128890079 | 0.131933011  |
| H | 4.292079306  | -1.469518108 | -1.098145082 |
| H | 3.985679287  | -1.884990137 | 0.596509042  |
| H | -0.329623021 | -0.955697070 | -0.789145055 |
| O | 0.588184042  | 3.310346240  | 0.288010020  |
| H | -0.931977065 | 3.350815239  | -0.394406027 |
| C | 2.680505195  | 5.886326424  | 1.928438140  |

|   |              |             |              |
|---|--------------|-------------|--------------|
| O | 2.808324203  | 5.277964382 | 0.680117048  |
| H | 2.029269144  | 4.762759344 | 0.501278035  |
| H | 1.864009132  | 6.605846475 | 1.952073143  |
| H | 3.602099257  | 6.415626463 | 2.133392155  |
| H | 2.519185183  | 5.161874372 | 2.723934195  |
| C | -4.283685306 | 5.813735418 | -0.777044058 |
| O | -4.360604315 | 4.551282330 | -0.181958015 |
| H | -3.491350254 | 4.176977301 | -0.101744005 |
| H | -5.292666382 | 6.194970446 | -0.859637064 |
| H | -3.849745277 | 5.771345415 | -1.773518129 |
| H | -3.705061264 | 6.512423470 | -0.177928013 |

Coord\_3

|   |              |              |              |
|---|--------------|--------------|--------------|
| C | -2.656300189 | -0.621056046 | 0.302413024  |
| C | -3.808518274 | -1.441426104 | 0.227505015  |
| C | -4.965901356 | -0.997208072 | -0.353136023 |
| C | -5.021382363 | 0.316010021  | -0.846199063 |
| C | -3.890233280 | 1.187527088  | -0.781729054 |
| C | -2.621387190 | 0.702547051  | -0.296465024 |
| C | -0.102135009 | 1.079718077  | -0.221170018 |
| C | 0.383714028  | -0.223338014 | -0.504799037 |
| C | 0.877549063  | 2.095295151  | 0.149810010  |
| C | 1.720680125  | -0.549043039 | -0.392412029 |
| C | 2.256702160  | 1.710166124  | 0.305623023  |
| C | 2.664395193  | 0.433986030  | 0.029315001  |
| H | -1.822413133 | -0.960051071 | 0.882882063  |
| H | -3.763307269 | -2.426101174 | 0.654106049  |
| H | -5.828621417 | -1.632684119 | -0.409975031 |
| H | -5.924967428 | 0.689492052  | -1.286771095 |
| H | -4.003875290 | 2.197489157  | -1.115492078 |
| C | -1.468596107 | 1.514982107  | -0.344743023 |
| O | -1.693400122 | 2.818286202  | -0.664496047 |
| H | 2.038157147  | -1.539421111 | -0.651709045 |
| H | 2.961297211  | 2.457232174  | 0.615570044  |
| O | 3.980440289  | 0.173125015  | 0.173882014  |
| C | 4.484379323  | -1.108689081 | -0.073643005 |
| H | 5.540561401  | -1.058485078 | 0.143271009  |
| H | 4.350703313  | -1.399188102 | -1.110460079 |
| H | 4.027888290  | -1.851895132 | 0.571476043  |
| H | -0.289338022 | -0.973199068 | -0.866453062 |
| O | 0.516203035  | 3.274207238  | 0.329032026  |
| H | -0.890016066 | 3.324699241  | -0.548735037 |
| C | 2.730501195  | 5.763481413  | 1.998407146  |
| O | 2.679368194  | 5.360657387  | 0.663934045  |
| H | 1.907359137  | 4.822983345  | 0.527904038  |
| H | 1.888162137  | 6.398075458  | 2.267521162  |
| H | 3.639792262  | 6.334216454  | 2.135325155  |

|   |              |             |              |
|---|--------------|-------------|--------------|
| H | 2.752596197  | 4.917626352 | 2.682303191  |
| C | -4.337492313 | 5.842068420 | -0.843704061 |
| O | -4.378685317 | 4.570964331 | -0.264149021 |
| H | -3.500017251 | 4.218232304 | -0.187024014 |
| H | -5.356606387 | 6.197151445 | -0.917227064 |
| H | -3.907226283 | 5.823291417 | -1.842477132 |
| H | -3.774885271 | 6.548382472 | -0.238421016 |

Coord\_4

|   |              |              |              |
|---|--------------|--------------|--------------|
| C | -2.656379190 | -0.590748043 | 0.336630027  |
| C | -3.810405272 | -1.404033101 | 0.307407023  |
| C | -4.973915360 | -0.968317069 | -0.273537017 |
| C | -5.025061362 | 0.325325023  | -0.812811058 |
| C | -3.893268280 | 1.184149085  | -0.794697056 |
| C | -2.628526188 | 0.709434049  | -0.298115020 |
| C | -0.096215007 | 1.055320074  | -0.256209018 |
| C | 0.406457029  | -0.227701017 | -0.565419043 |
| C | 0.851587061  | 2.066669149  | 0.173670015  |
| C | 1.752975124  | -0.534910038 | -0.432820030 |
| C | 2.229648158  | 1.708987123  | 0.348354023  |
| C | 2.665346193  | 0.444968030  | 0.035323005  |
| H | -1.806672132 | -0.921975064 | 0.899069066  |
| H | -3.766317272 | -2.375932171 | 0.762411053  |
| H | -5.841788422 | -1.599036113 | -0.297705024 |
| H | -5.931626425 | 0.688545047  | -1.256368090 |
| H | -4.001801291 | 2.179207157  | -1.173788085 |
| C | -1.464224108 | 1.508462109  | -0.386314029 |
| O | -1.660522117 | 2.790084198  | -0.796378056 |
| H | 2.090781152  | -1.514230109 | -0.708646051 |
| H | 2.915681212  | 2.453106174  | 0.703467052  |
| O | 3.983435289  | 0.207417013  | 0.200722016  |
| C | 4.515291323  | -1.058679074 | -0.067371006 |
| H | 5.566264402  | -0.995354073 | 0.170349015  |
| H | 4.405502316  | -1.326361094 | -1.113094080 |
| H | 4.059694292  | -1.824678134 | 0.551198039  |
| H | -0.250395016 | -0.979797072 | -0.952418071 |
| O | 0.443455033  | 3.234811230  | 0.384095030  |
| H | -0.857296063 | 3.297666237  | -0.698396052 |
| C | 2.793797202  | 5.645789408  | 2.034902146  |
| O | 2.537430182  | 5.440335394  | 0.678925049  |
| H | 1.778296129  | 4.876680352  | 0.584688043  |
| H | 1.975254144  | 6.161679445  | 2.533149181  |
| H | 3.678646265  | 6.264028453  | 2.111818149  |
| H | 2.982242216  | 4.713545341  | 2.563195182  |
| C | -4.399340317 | 5.866756422  | -0.888502063 |
| O | -4.402570315 | 4.584395332  | -0.333086026 |
| H | -3.514471251 | 4.254608308  | -0.262335017 |

|   |              |             |              |
|---|--------------|-------------|--------------|
| H | -5.428287393 | 6.194568446 | -0.949895070 |
| H | -3.974557288 | 5.878538422 | -1.889712134 |
| H | -3.853000278 | 6.576784473 | -0.272858019 |

Coord\_5

|   |              |              |              |
|---|--------------|--------------|--------------|
| C | -2.650597193 | -0.559249043 | 0.360689028  |
| C | -3.804640272 | -1.365707100 | 0.371623026  |
| C | -4.974168359 | -0.938321069 | -0.210050014 |
| C | -5.023122361 | 0.336171024  | -0.790259058 |
| C | -3.892379279 | 1.182066084  | -0.812323056 |
| C | -2.631753191 | 0.718869052  | -0.304666022 |
| C | -0.089433008 | 1.034816075  | -0.288974022 |
| C | 0.428885031  | -0.226766014 | -0.628061045 |
| C | 0.825582058  | 2.034818145  | 0.207015013  |
| C | 1.783004129  | -0.519458036 | -0.470926031 |
| C | 2.200045157  | 1.699925121  | 0.404891029  |
| C | 2.663288191  | 0.450829033  | 0.051055005  |
| H | -1.786388127 | -0.884451063 | 0.904978066  |
| H | -3.760805272 | -2.325654167 | 0.851286059  |
| H | -5.845680420 | -1.564652112 | -0.205469016 |
| H | -5.932761426 | 0.689016052  | -1.236428088 |
| H | -3.995830287 | 2.161854155  | -1.231612088 |
| C | -1.458215105 | 1.505889106  | -0.427865032 |
| O | -1.631753116 | 2.759052197  | -0.924470066 |
| H | 2.140337152  | -1.486198109 | -0.766518055 |
| H | 2.866573208  | 2.435608177  | 0.810846059  |
| O | 3.981310288  | 0.232341018  | 0.241977018  |
| C | 4.539705329  | -1.016691071 | -0.050138004 |
| H | 5.583992401  | -0.944371068 | 0.213062017  |
| H | 4.457169320  | -1.255226088 | -1.105375077 |
| H | 4.081961293  | -1.806978128 | 0.535437040  |
| H | -0.211374015 | -0.976722070 | -1.046754075 |
| O | 0.371183026  | 3.189094232  | 0.451191033  |
| H | -0.830185058 | 3.269225235  | -0.842240060 |
| C | 2.857767207  | 5.542145397  | 2.035772145  |
| O | 2.383265170  | 5.514012398  | 0.723704055  |
| H | 1.643871116  | 4.920282356  | 0.669278048  |
| H | 2.110064154  | 5.912992427  | 2.734034199  |
| H | 3.706653267  | 6.212630445  | 2.062862147  |
| H | 3.186539232  | 4.561989327  | 2.374757170  |
| C | -4.462495320 | 5.889459423  | -0.908190066 |
| O | -4.427066321 | 4.593597332  | -0.386351029 |
| H | -3.530025253 | 4.287181310  | -0.325186024 |
| H | -5.500473398 | 6.189959444  | -0.954495070 |
| H | -4.045337290 | 5.938613427  | -1.911456138 |
| H | -3.931567283 | 6.598112475  | -0.277754020 |

## Coord\_6

|   |              |              |              |
|---|--------------|--------------|--------------|
| C | -2.639162191 | -0.527422037 | 0.374845027  |
| C | -3.792363270 | -1.326778096 | 0.420739030  |
| C | -4.967585357 | -0.906489063 | -0.161776010 |
| C | -5.015279362 | 0.349869025  | -0.777658057 |
| C | -3.886313277 | 1.182130083  | -0.834051058 |
| C | -2.630163188 | 0.730334053  | -0.315932021 |
| C | -0.080396005 | 1.016539071  | -0.320020021 |
| C | 0.452338035  | -0.222051018 | -0.692670047 |
| C | 0.800743060  | 1.997159145  | 0.248086020  |
| C | 1.811878130  | -0.505076035 | -0.506848038 |
| C | 2.168954158  | 1.679612123  | 0.473226037  |
| C | 2.659247193  | 0.448424033  | 0.075249005  |
| H | -1.761814125 | -0.848890061 | 0.900760063  |
| H | -3.748760271 | -2.275958163 | 0.921325065  |
| H | -5.841926420 | -1.528374112 | -0.132151011 |
| H | -5.927847427 | 0.693110048  | -1.225863090 |
| H | -3.983524286 | 2.147055152  | -1.288446095 |
| C | -1.448915105 | 1.506318110  | -0.469650031 |
| O | -1.604324118 | 2.725324196  | -1.048382073 |
| H | 2.187797159  | -1.457725102 | -0.824933059 |
| H | 2.814876200  | 2.400614172  | 0.934810068  |
| O | 3.974909286  | 0.243917019  | 0.296169023  |
| C | 4.558283329  | -0.986791070 | -0.022772000 |
| H | 5.594298403  | -0.910261065 | 0.270191019  |
| H | 4.506146326  | -1.190113087 | -1.087278078 |
| H | 4.095534293  | -1.802036131 | 0.523352039  |
| H | -0.170956013 | -0.964990068 | -1.148764082 |
| O | 0.300633020  | 3.134474223  | 0.527425037  |
| H | -0.805470057 | 3.239001235  | -0.980132073 |
| C | 2.909993207  | 5.460587393  | 2.001332142  |
| O | 2.217638158  | 5.578643403  | 0.795107057  |
| H | 1.505771110  | 4.950582358  | 0.777581056  |
| H | 2.275370163  | 5.669488410  | 2.860128205  |
| H | 3.712378267  | 6.186357446  | 1.990045146  |
| H | 3.346193241  | 4.472127320  | 2.129456151  |
| C | -4.520595325 | 5.911424427  | -0.900945063 |
| O | -4.447254322 | 4.600434329  | -0.422541032 |
| H | -3.542143253 | 4.317030310  | -0.374059025 |
| H | -5.566448402 | 6.185487447  | -0.929313065 |
| H | -4.113519297 | 6.004307433  | -1.905249138 |
| H | -4.003076290 | 6.612711475  | -0.251499018 |

## Coord\_7

|   |              |              |              |
|---|--------------|--------------|--------------|
| C | -2.621997189 | -0.495663036 | 0.380016026  |
| C | -3.774274272 | -1.287122093 | 0.456334032  |
| C | -4.954725355 | -0.871877060 | -0.126874008 |

|   |              |              |              |
|---|--------------|--------------|--------------|
| C | -5.001125357 | 0.367689027  | -0.773575057 |
| C | -3.873882279 | 1.185134085  | -0.859123063 |
| C | -2.622802189 | 0.743543053  | -0.331420023 |
| C | -0.067833004 | 0.999135071  | -0.349944026 |
| C | 0.478049032  | -0.214837015 | -0.759035055 |
| C | 0.778168057  | 1.951654140  | 0.294633023  |
| C | 1.840594134  | -0.493866034 | -0.540794039 |
| C | 2.137338156  | 1.645317119  | 0.550609039  |
| C | 2.654146189  | 0.435108029  | 0.106140007  |
| H | -1.732867125 | -0.816058058 | 0.887216062  |
| H | -3.731543267 | -2.226883159 | 0.974394071  |
| H | -5.831688418 | -1.488830109 | -0.075444007 |
| H | -5.916330424 | 0.702783053  | -1.223097086 |
| H | -3.962730287 | 2.136115153  | -1.343892096 |
| C | -1.434786105 | 1.509017110  | -0.511964039 |
| O | -1.575976114 | 2.688900195  | -1.168370083 |
| H | 2.234034159  | -1.430998100 | -0.883442065 |
| H | 2.761404199  | 2.344816167  | 1.071371078  |
| O | 3.964973285  | 0.238731019  | 0.361063024  |
| C | 4.571593327  | -0.972565071 | 0.013298002  |
| H | 5.597646402  | -0.897181062 | 0.339669023  |
| H | 4.552712325  | -1.135208079 | -1.059275076 |
| H | 4.101244295  | -1.812417129 | 0.513763035  |
| H | -0.127912010 | -0.945488066 | -1.257282090 |
| O | 0.232977015  | 3.069111223  | 0.609195046  |
| H | -0.780528055 | 3.206599230  | -1.112831079 |
| C | 2.938699210  | 5.407625387  | 1.933997141  |
| O | 2.041283145  | 5.631454404  | 0.888259065  |
| H | 1.365509098  | 4.965134356  | 0.903929067  |
| H | 2.452847179  | 5.448697394  | 2.906595212  |
| H | 3.685241264  | 6.189757447  | 1.896102134  |
| H | 3.444681250  | 4.448755323  | 1.842739133  |
| C | -4.567747331 | 5.933408429  | -0.866302062 |
| O | -4.458635321 | 4.606495329  | -0.441209030 |
| H | -3.546598253 | 4.345118313  | -0.408406031 |
| H | -5.620082406 | 6.182678447  | -0.873933062 |
| H | -4.173454298 | 6.075620439  | -1.869930133 |
| H | -4.060480290 | 6.620703475  | -0.194283014 |

Coord\_8

|   |              |              |              |
|---|--------------|--------------|--------------|
| C | -2.598838186 | -0.463935034 | 0.377627029  |
| C | -3.750717270 | -1.246174088 | 0.480732035  |
| C | -4.935858355 | -0.833335060 | -0.102811006 |
| C | -4.980183358 | 0.390836028  | -0.776191056 |
| C | -3.854004276 | 1.191789087  | -0.886637063 |
| C | -2.608721190 | 0.758416055  | -0.350395028 |
| C | -0.050642003 | 0.981615071  | -0.379295027 |

|   |              |              |              |
|---|--------------|--------------|--------------|
| C | 0.507131037  | -0.206144014 | -0.826725059 |
| C | 0.758788056  | 1.897015134  | 0.344125023  |
| C | 1.870046134  | -0.487504033 | -0.572940043 |
| C | 2.106015149  | 1.595252115  | 0.633830046  |
| C | 2.648785189  | 0.409000027  | 0.141700009  |
| H | -1.699252124 | -0.786123056 | 0.865658064  |
| H | -3.709999266 | -2.177825158 | 1.013327070  |
| H | -5.815718420 | -1.444435101 | -0.032161001 |
| H | -5.897646425 | 0.719728050  | -1.226221089 |
| H | -3.931618285 | 2.129964156  | -1.397653102 |
| C | -1.414467101 | 1.513455108  | -0.555121042 |
| O | -1.545079111 | 2.649553189  | -1.285168090 |
| H | 2.279848166  | -1.407872102 | -0.941443067 |
| H | 2.706830197  | 2.266140163  | 1.215817089  |
| O | 3.952136286  | 0.214312018  | 0.433953031  |
| C | 4.580136328  | -0.976756070 | 0.056310005  |
| H | 5.594429401  | -0.908259065 | 0.418905029  |
| H | 4.597048330  | -1.094199081 | -1.022178073 |
| H | 4.099918293  | -1.839746133 | 0.505435034  |
| H | -0.081101007 | -0.919035067 | -1.370677101 |
| O | 0.169245013  | 2.992144218  | 0.692474051  |
| H | -0.753454056 | 3.171505227  | -1.241802089 |
| C | 2.933080210  | 5.387510386  | 1.837727131  |
| O | 1.854861134  | 5.670327410  | 0.996791070  |
| H | 1.224362090  | 4.962659357  | 1.041406073  |
| H | 2.623808187  | 5.266698379  | 2.873690208  |
| H | 3.615721259  | 6.225033450  | 1.784352128  |
| H | 3.468593251  | 4.491288325  | 1.531401112  |
| C | -4.598555332 | 5.955691427  | -0.805034057 |
| O | -4.457211321 | 4.613036330  | -0.442754032 |
| H | -3.539587253 | 4.372218316  | -0.428572028 |
| H | -5.655819407 | 6.182448445  | -0.789073056 |
| H | -4.219885305 | 6.151815443  | -1.805589128 |
| H | -4.097279297 | 6.622001478  | -0.107926007 |

Coord\_9

|   |              |              |              |
|---|--------------|--------------|--------------|
| C | -2.569320187 | -0.431840031 | 0.369428025  |
| C | -3.721782270 | -1.203010089 | 0.496711034  |
| C | -4.911022352 | -0.789574059 | -0.086662009 |
| C | -4.951936358 | 0.420407030  | -0.783498057 |
| C | -3.825737273 | 1.202688085  | -0.915631065 |
| C | -2.587040184 | 0.775042058  | -0.371965028 |
| C | -0.027924001 | 0.963406071  | -0.408471029 |
| C | 0.540572039  | -0.196699015 | -0.895055066 |
| C | 0.743300054  | 1.832850133  | 0.394030026  |
| C | 1.901023139  | -0.487106033 | -0.603329042 |
| C | 2.075599147  | 1.528822108  | 0.719563052  |

|   |              |              |              |
|---|--------------|--------------|--------------|
| C | 2.643819189  | 0.369214026  | 0.179905014  |
| H | -1.660592117 | -0.758773054 | 0.837751060  |
| H | -3.684577263 | -2.127650154 | 1.041573076  |
| H | -5.794427418 | -1.393461103 | 0.001382999  |
| H | -5.871227425 | 0.745351055  | -1.233191089 |
| H | -3.888689278 | 2.129123156  | -1.449529105 |
| C | -1.386824098 | 1.519297108  | -0.599439044 |
| O | -1.510707106 | 2.606777189  | -1.399786099 |
| H | 2.326002170  | -1.389727101 | -0.998125073 |
| H | 2.651606191  | 2.164085156  | 1.363197096  |
| O | 3.936903284  | 0.169461013  | 0.512013036  |
| C | 4.584363332  | -1.000923071 | 0.104448005  |
| H | 5.584992403  | -0.945179069 | 0.505154036  |
| H | 4.639299334  | -1.069878079 | -0.976957073 |
| H | 4.092382296  | -1.884492134 | 0.497345036  |
| H | -0.029444004 | -0.886419063 | -1.486929109 |
| O | 0.110233008  | 2.903843210  | 0.773179058  |
| H | -0.723151054 | 3.133033226  | -1.368972097 |
| C | 2.883571207  | 5.401580389  | 1.717342122  |
| O | 1.658896120  | 5.694128411  | 1.113246080  |
| H | 1.083270079  | 4.943359358  | 1.182345083  |
| H | 2.769837199  | 5.136382369  | 2.766145199  |
| H | 3.495533252  | 6.291574451  | 1.658092120  |
| H | 3.407897245  | 4.593224331  | 1.211850085  |
| C | -4.608124333 | 5.978160431  | -0.718948053 |
| O | -4.439522317 | 4.620972333  | -0.428259031 |
| H | -3.517808254 | 4.398888315  | -0.435661030 |
| H | -5.668631407 | 6.185216444  | -0.676357047 |
| H | -4.247913305 | 6.231576446  | -1.713436122 |
| H | -4.107555295 | 6.616377478  | 0.004396002  |

Coord\_10

|   |              |              |              |
|---|--------------|--------------|--------------|
| C | -2.361268172 | -0.412923029 | 0.274232017  |
| C | -3.525952255 | -1.149798083 | 0.446358030  |
| C | -4.719454341 | -0.717282049 | -0.123326007 |
| C | -4.745104340 | 0.473842036  | -0.850902062 |
| C | -3.607147259 | 1.214351088  | -1.024448074 |
| C | -2.375631169 | 0.773464057  | -0.487865037 |
| C | 0.183669015  | 0.880614063  | -0.566764042 |
| C | 0.735520053  | -0.264527018 | -1.090559077 |
| C | 0.940522065  | 1.690681120  | 0.295938021  |
| C | 2.089636150  | -0.590853043 | -0.775326057 |
| C | 2.254332160  | 1.358531097  | 0.643119049  |
| C | 2.820380204  | 0.213160015  | 0.058832006  |
| H | -1.444344104 | -0.759299056 | 0.712433050  |
| H | -3.501715254 | -2.064002148 | 1.009193074  |
| H | -5.615637401 | -1.296207093 | -0.001730002 |



|   |              |              |              |
|---|--------------|--------------|--------------|
| H | -5.666343409 | 0.809073056  | -1.289450092 |
| H | -3.643936265 | 2.125836155  | -1.585730115 |
| C | -1.161100082 | 1.483672107  | -0.760630054 |
| O | -1.277463090 | 2.511836181  | -1.635604119 |
| H | 2.507892180  | -1.485787107 | -1.194535088 |
| H | 2.823368204  | 1.948036140  | 1.334578095  |
| O | 4.101608295  | -0.016888999 | 0.416629032  |
| C | 4.741155339  | -1.181164086 | -0.019295004 |
| H | 5.732596411  | -1.156883084 | 0.406567029  |
| H | 4.820733347  | -1.210210085 | -1.100972079 |
| H | 4.225577305  | -2.070395149 | 0.327959024  |
| H | 0.164512010  | -0.921835065 | -1.717998122 |
| O | 0.288168022  | 2.751130196  | 0.701835048  |
| H | -0.485222035 | 3.029184217  | -1.634029118 |
| C | 3.067683222  | 5.352814387  | 1.372228099  |
| O | 1.739038125  | 5.627416405  | 1.040245074  |
| H | 1.216120085  | 4.843053350  | 1.143235084  |
| H | 3.166642225  | 4.977625358  | 2.388343171  |
| H | 3.618180261  | 6.280996452  | 1.299226091  |
| H | 3.520353252  | 4.633827334  | 0.692455048  |
| C | -4.325777313 | 6.012000432  | -0.719186050 |
| O | -4.156506302 | 4.641234334  | -0.498944035 |
| H | -3.236468232 | 4.419956317  | -0.541970040 |
| H | -5.383221388 | 6.221117448  | -0.633618047 |
| H | -3.995207287 | 6.310935454  | -1.711337125 |
| H | -3.799327275 | 6.612594474  | 0.017817001  |

Coord\_11

|   |              |              |              |
|---|--------------|--------------|--------------|
| C | -2.350761167 | -0.374443027 | 0.289125023  |
| C | -3.496397250 | -1.144731084 | 0.436556032  |
| C | -4.687357338 | -0.750818054 | -0.161471013 |
| C | -4.730106340 | 0.434980031  | -0.894892064 |
| C | -3.607973257 | 1.208562085  | -1.043926073 |
| C | -2.377133170 | 0.810117059  | -0.475050037 |
| C | 0.166869013  | 0.936008067  | -0.530375036 |
| C | 0.694351048  | -0.238868017 | -1.028037076 |
| C | 0.966850068  | 1.773336129  | 0.278464022  |
| C | 2.040730145  | -0.576448044 | -0.742331051 |
| C | 2.289743167  | 1.423758104  | 0.596424041  |
| C | 2.815975201  | 0.249324020  | 0.046464001  |
| H | -1.435407105 | -0.690054049 | 0.753325053  |
| H | -3.458607248 | -2.054783150 | 1.005554071  |
| H | -5.568687399 | -1.355279096 | -0.056286002 |
| H | -5.649518409 | 0.742795055  | -1.356790098 |
| H | -3.659601266 | 2.114095151  | -1.609303115 |
| C | -1.162310083 | 1.548774112  | -0.699807050 |
| O | -1.279897093 | 2.657288189  | -1.475996106 |

|   |              |              |              |
|---|--------------|--------------|--------------|
| H | 2.434374173  | -1.490805110 | -1.142669082 |
| H | 2.889311209  | 2.033293146  | 1.243366088  |
| O | 4.101909296  | 0.002066998  | 0.372538026  |
| C | 4.706362337  | -1.189410086 | -0.040804000 |
| H | 5.709287413  | -1.170320085 | 0.357465026  |
| H | 4.756121345  | -1.256405090 | -1.122508079 |
| H | 4.184275301  | -2.056086149 | 0.350657023  |
| H | 0.097197007  | -0.904815063 | -1.620619115 |
| O | 0.370394028  | 2.861562207  | 0.670085048  |
| H | -0.493154037 | 3.185698232  | -1.468380107 |
| C | 3.219514229  | 5.246622378  | 1.413747102  |
| O | 1.935205137  | 5.648731406  | 1.042550074  |
| H | 1.341533098  | 4.909859353  | 1.088045078  |
| H | 3.240689231  | 4.813144347  | 2.411118171  |
| H | 3.847722275  | 6.127163441  | 1.414182102  |
| H | 3.642432264  | 4.527167326  | 0.715414054  |
| C | -4.473834324 | 5.955014430  | -0.786882055 |
| O | -4.290354310 | 4.592067333  | -0.537092037 |
| H | -3.365304244 | 4.383213318  | -0.516361036 |
| H | -5.538780396 | 6.142104443  | -0.774072055 |
| H | -4.084782295 | 6.249104448  | -1.759078126 |
| H | -4.010025287 | 6.576366471  | -0.025349003 |

Coord\_12

|   |              |              |              |
|---|--------------|--------------|--------------|
| C | -2.348688168 | -0.346580025 | 0.309182021  |
| C | -3.477889249 | -1.144456082 | 0.429283031  |
| C | -4.661482333 | -0.782934054 | -0.199496013 |
| C | -4.714047340 | 0.397824031  | -0.938713068 |
| C | -3.605172258 | 1.198893085  | -1.060450077 |
| C | -2.381017172 | 0.836452062  | -0.456595033 |
| C | 0.148656012  | 0.984729072  | -0.489160035 |
| C | 0.652621045  | -0.217444017 | -0.962436068 |
| C | 0.992206072  | 1.847551132  | 0.260277021  |
| C | 1.991990142  | -0.564421041 | -0.711230050 |
| C | 2.324729165  | 1.481547106  | 0.543573040  |
| C | 2.812299202  | 0.281862018  | 0.027078000  |
| H | -1.439121104 | -0.636113044 | 0.801157056  |
| H | -3.432619247 | -2.050586145 | 1.004179072  |
| H | -5.530104398 | -1.408431104 | -0.112766010 |
| H | -5.627939407 | 0.682539049  | -1.425729104 |
| H | -3.663930264 | 2.099170152  | -1.629870118 |
| C | -1.167377082 | 1.601588113  | -0.631786046 |
| O | -1.291656094 | 2.778845199  | -1.302750094 |
| H | 2.361638172  | -1.496066105 | -1.093808077 |
| H | 2.955006215  | 2.109439154  | 1.142040080  |
| O | 4.103235293  | 0.018617001  | 0.316677023  |
| C | 4.673699337  | -1.197095089 | -0.075358005 |

|   |              |              |              |
|---|--------------|--------------|--------------|
| H | 5.688710408  | -1.182452088 | 0.291131023  |
| H | 4.688806337  | -1.300615092 | -1.155149082 |
| H | 4.150300296  | -2.041043148 | 0.361172024  |
| H | 0.029152004  | -0.891305062 | -1.517301110 |
| O | 0.450429033  | 2.959518213  | 0.636755047  |
| H | -0.510401035 | 3.317861239  | -1.286004095 |
| C | 3.333934241  | 5.173673373  | 1.457174107  |
| O | 2.095721149  | 5.669354406  | 1.047178073  |
| H | 1.456761105  | 4.967287356  | 1.026680075  |
| H | 3.278552238  | 4.684410340  | 2.427076173  |
| H | 4.009223287  | 6.014583431  | 1.540531113  |
| H | 3.753121269  | 4.470863321  | 0.739757054  |
| C | -4.573860328 | 5.900473427  | -0.850964060 |
| O | -4.393642316 | 4.542621328  | -0.576073043 |
| H | -3.470087251 | 4.338278311  | -0.492901037 |
| H | -5.639099406 | 6.076819438  | -0.909964064 |
| H | -4.124672295 | 6.189784445  | -1.798368129 |
| H | -4.167128302 | 6.533912469  | -0.067026003 |

Coord\_13

|   |              |              |              |
|---|--------------|--------------|--------------|
| C | -2.356243168 | -0.331439025 | 0.332411024  |
| C | -3.472343250 | -1.150641084 | 0.421733032  |
| C | -4.643503335 | -0.814218061 | -0.240418020 |
| C | -4.697582339 | 0.362461026  | -0.984650072 |
| C | -3.598713258 | 1.185045088  | -1.075553076 |
| C | -2.387312170 | 0.850670060  | -0.434037032 |
| C | 0.129623010  | 1.025310072  | -0.443494033 |
| C | 0.611873042  | -0.201784016 | -0.893972063 |
| C | 1.015508075  | 1.911892138  | 0.241814016  |
| C | 1.944418139  | -0.556312040 | -0.681002049 |
| C | 2.357634169  | 1.530512110  | 0.486077037  |
| C | 2.808825201  | 0.309292021  | 0.002422002  |
| H | -1.456855103 | -0.600405041 | 0.854097059  |
| H | -3.426408246 | -2.053566148 | 1.001808072  |
| H | -5.502170396 | -1.455901102 | -0.174847011 |
| H | -5.602071403 | 0.629361043  | -1.498597107 |
| H | -3.656935266 | 2.081508152  | -1.648245121 |
| C | -1.176011085 | 1.639939117  | -0.557844040 |
| O | -1.312573095 | 2.874137204  | -1.117637082 |
| H | 2.291395163  | -1.503146111 | -1.046752075 |
| H | 3.017468217  | 2.175118157  | 1.032772075  |
| O | 4.104505297  | 0.031360002  | 0.251911019  |
| C | 4.642948334  | -1.205681085 | -0.119750007 |
| H | 5.669968411  | -1.194701086 | 0.211646018  |
| H | 4.619917333  | -1.344054099 | -1.195416083 |
| H | 4.123390294  | -2.027057146 | 0.361873025  |
| H | -0.037045000 | -0.882881063 | -1.408885101 |

|   |              |             |              |
|---|--------------|-------------|--------------|
| O | 0.526190038  | 3.043665216 | 0.601844043  |
| H | -0.536376039 | 3.422575246 | -1.088675079 |
| C | 3.416743247  | 5.139603370 | 1.498483107  |
| O | 2.218170161  | 5.693065410 | 1.048800076  |
| H | 1.559098111  | 5.014524363 | 0.960413071  |
| H | 3.293028237  | 4.599803333 | 2.434713174  |
| H | 4.108681294  | 5.953984428 | 1.666404118  |
| H | 3.857705278  | 4.464639324 | 0.767364056  |
| C | -4.628040331 | 5.850607420 | -0.906297067 |
| O | -4.467438322 | 4.494506326 | -0.613525044 |
| H | -3.551480257 | 4.286488310 | -0.469961034 |
| H | -5.686933410 | 6.027790436 | -1.035525077 |
| H | -4.117712296 | 6.135080440 | -1.823757132 |
| H | -4.272486307 | 6.487802467 | -0.100743008 |

Coord\_14

|   |              |              |              |
|---|--------------|--------------|--------------|
| C | -2.374453173 | -0.330553024 | 0.356699026  |
| C | -3.481392249 | -1.164290084 | 0.411042032  |
| C | -4.634731333 | -0.844665062 | -0.287242020 |
| C | -4.681066336 | 0.329441021  | -1.034966075 |
| C | -3.588374257 | 1.167077086  | -1.090816077 |
| C | -2.395897171 | 0.851393059  | -0.409050029 |
| C | 0.110495009  | 1.057095077  | -0.393938028 |
| C | 0.573616041  | -0.192788014 | -0.822834061 |
| C | 1.036006073  | 1.965916139  | 0.223406014  |
| C | 1.899042137  | -0.553028040 | -0.650412048 |
| C | 2.387189173  | 1.570271112  | 0.425582029  |
| C | 2.805213201  | 0.330950023  | -0.025467004 |
| H | -1.489882108 | -0.585222041 | 0.910136068  |
| H | -3.442340249 | -2.065088147 | 0.995125072  |
| H | -5.486716393 | -1.497269105 | -0.246139018 |
| H | -5.572051400 | 0.584728043  | -1.577628115 |
| H | -3.638477262 | 2.061737148  | -1.665307118 |
| C | -1.187879086 | 1.662187121  | -0.479645036 |
| O | -1.342804097 | 2.940938212  | -0.922893065 |
| H | 2.225266158  | -1.513113111 | -0.999937071 |
| H | 3.074273220  | 2.230119163  | 0.917929065  |
| O | 4.104902296  | 0.039729003  | 0.181595015  |
| C | 4.614006334  | -1.215937085 | -0.170088014 |
| H | 5.652344406  | -1.207741087 | 0.123914007  |
| H | 4.550802329  | -1.387553098 | -1.239263091 |
| H | 4.103104295  | -2.015085146 | 0.355943028  |
| H | -0.098984007 | -0.880616063 | -1.296194091 |
| O | 0.596041043  | 3.113818223  | 0.565182040  |
| H | -0.570850042 | 3.496968254  | -0.878933062 |
| C | 3.472851249  | 5.147005369  | 1.533460109  |
| O | 2.302502165  | 5.722798414  | 1.041349075  |

|   |              |             |              |
|---|--------------|-------------|--------------|
| H | 1.646443119  | 5.051859364 | 0.890137062  |
| H | 3.295350235  | 4.563959326 | 2.434479177  |
| H | 4.153563298  | 5.951016427 | 1.779401130  |
| H | 3.956418282  | 4.506004326 | 0.798573057  |
| C | -4.638816333 | 5.806774419 | -0.947867067 |
| O | -4.512871327 | 4.449023319 | -0.647113046 |
| H | -3.610326260 | 4.228922303 | -0.445976033 |
| H | -5.684997410 | 5.996583430 | -1.145002081 |
| H | -4.067024292 | 6.086127438 | -1.830009134 |
| H | -4.328639310 | 6.439460463 | -0.120229007 |

Coord\_15

|   |              |              |              |
|---|--------------|--------------|--------------|
| C | -2.374453173 | -0.330553024 | 0.356699026  |
| C | -3.481392249 | -1.164290084 | 0.411042032  |
| C | -4.634731333 | -0.844665062 | -0.287242020 |
| C | -4.681066336 | 0.329441021  | -1.034966075 |
| C | -3.588374257 | 1.167077086  | -1.090816077 |
| C | -2.395897171 | 0.851393059  | -0.409050029 |
| C | 0.110495009  | 1.057095077  | -0.393938028 |
| C | 0.573616041  | -0.192788014 | -0.822834061 |
| C | 1.036006073  | 1.965916139  | 0.223406014  |
| C | 1.899042137  | -0.553028040 | -0.650412048 |
| C | 2.387189173  | 1.570271112  | 0.425582029  |
| C | 2.805213201  | 0.330950023  | -0.025467004 |
| H | -1.489882108 | -0.585222041 | 0.910136068  |
| H | -3.442340249 | -2.065088147 | 0.995125072  |
| H | -5.486716393 | -1.497269105 | -0.246139018 |
| H | -5.572051400 | 0.584728043  | -1.577628115 |
| H | -3.638477262 | 2.061737148  | -1.665307118 |
| C | -1.187879086 | 1.662187121  | -0.479645036 |
| O | -1.342804097 | 2.940938212  | -0.922893065 |
| H | 2.225266158  | -1.513113111 | -0.999937071 |
| H | 3.074273220  | 2.230119163  | 0.917929065  |
| O | 4.104902296  | 0.039729003  | 0.181595015  |
| C | 4.614006334  | -1.215937085 | -0.170088014 |
| H | 5.652344406  | -1.207741087 | 0.123914007  |
| H | 4.550802329  | -1.387553098 | -1.239263091 |
| H | 4.103104295  | -2.015085146 | 0.355943028  |
| H | -0.098984007 | -0.880616063 | -1.296194091 |
| O | 0.596041043  | 3.113818223  | 0.565182040  |
| H | -0.570850042 | 3.496968254  | -0.878933062 |
| C | 3.472851249  | 5.147005369  | 1.533460109  |
| O | 2.302502165  | 5.722798414  | 1.041349075  |
| H | 1.646443119  | 5.051859364  | 0.890137062  |
| H | 3.295350235  | 4.563959326  | 2.434479177  |
| H | 4.153563298  | 5.951016427  | 1.779401130  |
| H | 3.956418282  | 4.506004326  | 0.798573057  |

|   |              |             |              |
|---|--------------|-------------|--------------|
| C | -4.638816333 | 5.806774419 | -0.947867067 |
| O | -4.512871327 | 4.449023319 | -0.647113046 |
| H | -3.610326260 | 4.228922303 | -0.445976033 |
| H | -5.684997410 | 5.996583430 | -1.145002081 |
| H | -4.067024292 | 6.086127438 | -1.830009134 |
| H | -4.328639310 | 6.439460463 | -0.120229007 |

Coord\_16

|   |              |              |              |
|---|--------------|--------------|--------------|
| C | -2.444574175 | -0.374727026 | 0.398004031  |
| C | -3.546190257 | -1.215012088 | 0.366989026  |
| C | -4.646321336 | -0.900546063 | -0.411021029 |
| C | -4.646960333 | 0.274610019  | -1.157141085 |
| C | -3.554014254 | 1.120866079  | -1.127752083 |
| C | -2.418543174 | 0.809406056  | -0.359439027 |
| C | 0.075247005  | 1.096959079  | -0.286341022 |
| C | 0.509544038  | -0.194163012 | -0.672586051 |
| C | 1.067990075  | 2.046448148  | 0.187164013  |
| C | 1.818295129  | -0.561232039 | -0.581354041 |
| C | 2.433903173  | 1.624828117  | 0.302820024  |
| C | 2.797169199  | 0.357638025  | -0.080828004 |
| H | -1.604692113 | -0.622233047 | 1.020409076  |
| H | -3.545651253 | -2.115791154 | 0.952811069  |
| H | -5.495816395 | -1.557513114 | -0.431044032 |
| H | -5.497873397 | 0.528447037  | -1.761362129 |
| H | -3.565965257 | 2.019721146  | -1.698005123 |
| C | -1.219909089 | 1.655394120  | -0.319369022 |
| O | -1.433158101 | 2.981726215  | -0.517424037 |
| H | 2.110023154  | -1.543333112 | -0.897758067 |
| H | 3.165515226  | 2.311392168  | 0.681619048  |
| O | 4.101238294  | 0.043564004  | 0.040965003  |
| C | 4.561120328  | -1.242866090 | -0.268335020 |
| H | 5.618156407  | -1.237718089 | -0.051146002 |
| H | 4.417516317  | -1.477977107 | -1.317321096 |
| H | 4.078697296  | -1.997868142 | 0.342582027  |
| H | -0.202771017 | -0.894618066 | -1.060427079 |
| O | 0.715236049  | 3.217372231  | 0.484285037  |
| H | -0.665785049 | 3.545320253  | -0.438482031 |
| C | 3.517415255  | 5.282713378  | 1.563915111  |
| O | 2.369135169  | 5.805677419  | 0.973308067  |
| H | 1.773414130  | 5.102904367  | 0.737817053  |
| H | 3.286889236  | 4.644701334  | 2.414356175  |
| H | 4.112147294  | 6.114792441  | 1.916665137  |
| H | 4.119132296  | 4.711243341  | 0.859206059  |
| C | -4.541555327 | 5.738456414  | -0.967668070 |
| O | -4.523600327 | 4.369800315  | -0.691194050 |
| H | -3.664595265 | 4.099703294  | -0.387571026 |
| H | -5.543209398 | 5.989307433  | -1.288952094 |

|   |              |             |              |
|---|--------------|-------------|--------------|
| H | -3.849139279 | 6.005605431 | -1.762988126 |
| H | -4.306603311 | 6.335955457 | -0.090403006 |

Coord\_17

|   |              |              |              |
|---|--------------|--------------|--------------|
| C | -2.495284178 | -0.419885028 | 0.407905027  |
| C | -3.600171258 | -1.251477089 | 0.325058021  |
| C | -4.664430337 | -0.924052064 | -0.495010036 |
| C | -4.627406334 | 0.255494020  | -1.233000088 |
| C | -3.528575254 | 1.094580078  | -1.152199082 |
| C | -2.431507175 | 0.766757053  | -0.339519022 |
| C | 0.060539004  | 1.110219081  | -0.230493015 |
| C | 0.484857035  | -0.201015016 | -0.592958041 |
| C | 1.080441076  | 2.077725148  | 0.168907012  |
| C | 1.783429127  | -0.570664042 | -0.538161038 |
| C | 2.451248175  | 1.642842120  | 0.244599017  |
| C | 2.792591202  | 0.364563029  | -0.101874008 |
| H | -1.685709124 | -0.675512047 | 1.066323077  |
| H | -3.631295263 | -2.154809155 | 0.906302067  |
| H | -5.517720396 | -1.573895114 | -0.552832038 |
| H | -5.451623390 | 0.520609039  | -1.868594136 |
| H | -3.511561253 | 2.000319143  | -1.713993124 |
| C | -1.239656090 | 1.627324119  | -0.243172017 |
| O | -1.495027108 | 2.953609213  | -0.315872023 |
| H | 2.061193148  | -1.562523111 | -0.835643061 |
| H | 3.199758228  | 2.340639170  | 0.565601043  |
| O | 4.096513297  | 0.039674001  | -0.018775002 |
| C | 4.536079327  | -1.260094090 | -0.302836021 |
| H | 5.599923404  | -1.256031088 | -0.122066009 |
| H | 4.355321311  | -1.527028107 | -1.338301095 |
| H | 4.070579294  | -1.991772142 | 0.348122026  |
| H | -0.243219018 | -0.907252067 | -0.937953069 |
| O | 0.765608056  | 3.256711236  | 0.437665029  |
| H | -0.727312054 | 3.516584251  | -0.220061015 |
| C | 3.510562251  | 5.402551387  | 1.546460110  |
| O | 2.364378168  | 5.858430422  | 0.899404067  |
| H | 1.815589128  | 5.121982366  | 0.653719046  |
| H | 3.275790235  | 4.760585341  | 2.392813174  |
| H | 4.044577291  | 6.267838449  | 1.916199138  |
| H | 4.172891302  | 4.857402351  | 0.875890066  |
| C | -4.441838320 | 5.712161411  | -0.932643066 |
| O | -4.492957324 | 4.336986314  | -0.693765047 |
| H | -3.663608265 | 4.028958291  | -0.348309027 |
| H | -5.411584389 | 6.011183430  | -1.306377096 |
| H | -3.692338266 | 5.971963432  | -1.677095118 |
| H | -4.238189303 | 6.277270452  | -0.026466001 |

Coord\_18

|   |              |              |              |
|---|--------------|--------------|--------------|
| C | -2.553525183 | -0.479596034 | 0.404084028  |
| C | -3.664155265 | -1.294601093 | 0.262374018  |
| C | -4.686508337 | -0.943443066 | -0.599218044 |
| C | -4.603805331 | 0.243673015  | -1.321358094 |
| C | -3.496672253 | 1.067974078  | -1.182555087 |
| C | -2.444551177 | 0.710792050  | -0.327077023 |
| C | 0.048124003  | 1.126350081  | -0.175606015 |
| C | 0.464168036  | -0.206288013 | -0.509741034 |
| C | 1.091955078  | 2.108983151  | 0.149418012  |
| C | 1.750961123  | -0.579942043 | -0.485027033 |
| C | 2.465449175  | 1.658402117  | 0.191367014  |
| C | 2.787089198  | 0.369903025  | -0.113150008 |
| H | -1.779514125 | -0.751480055 | 1.097968077  |
| H | -3.734036269 | -2.202567158 | 0.833130062  |
| H | -5.545802399 | -1.580012112 | -0.700356051 |
| H | -5.397235388 | 0.528348039  | -1.986984141 |
| H | -3.445729248 | 1.984562144  | -1.729370125 |
| C | -1.262052088 | 1.585571114  | -0.175075012 |
| O | -1.569954114 | 2.893248208  | -0.123721011 |
| H | 2.016017144  | -1.581589113 | -0.759935053 |
| H | 3.228037232  | 2.365088170  | 0.454802032  |
| O | 4.089018295  | 0.032729004  | -0.062480005 |
| C | 4.509760326  | -1.280046094 | -0.315760022 |
| H | 5.578600402  | -1.278161090 | -0.167524012 |
| H | 4.295935310  | -1.580213115 | -1.335632094 |
| H | 4.059960294  | -1.985717142 | 0.373663025  |
| H | -0.277540021 | -0.917267064 | -0.812558058 |
| O | 0.812410058  | 3.294565237  | 0.383874030  |
| H | -0.799879056 | 3.453016247  | -0.014892000 |
| C | 3.489762251  | 5.546253400  | 1.496942105  |
| O | 2.348639171  | 5.917068426  | 0.789285055  |
| H | 1.848569132  | 5.142244372  | 0.560707042  |
| H | 3.254367235  | 4.923656353  | 2.357539171  |
| H | 3.963585284  | 6.451158466  | 1.853815136  |
| H | 4.205950301  | 5.012816359  | 0.873756063  |
| C | -4.317600313 | 5.687636411  | -0.856590061 |
| O | -4.443810320 | 4.308001308  | -0.675934050 |
| H | -3.648615260 | 3.953751282  | -0.298007020 |
| H | -5.249427377 | 6.045856436  | -1.272419094 |
| H | -3.514940251 | 5.939793429  | -1.546323111 |
| H | -4.142148299 | 6.208434445  | 0.081572006  |

Coord\_19

|   |              |              |              |
|---|--------------|--------------|--------------|
| C | -2.611519188 | -0.702909050 | 0.416026030  |
| C | -3.722309267 | -1.494049109 | 0.177638013  |
| C | -4.717291340 | -1.066234074 | -0.680956047 |
| C | -4.610116330 | 0.174598012  | -1.303421096 |



|   |              |              |              |
|---|--------------|--------------|--------------|
| C | -3.500459252 | 0.977342070  | -1.068714079 |
| C | -2.479381179 | 0.536197039  | -0.217655016 |
| C | 0.011367002  | 1.067394078  | -0.025149001 |
| C | 0.430194031  | -0.263202021 | -0.412811029 |
| C | 1.069974077  | 2.056642150  | 0.269899019  |
| C | 1.707696121  | -0.627418047 | -0.452347031 |
| C | 2.449073177  | 1.602946114  | 0.237246015  |
| C | 2.762397200  | 0.326607023  | -0.102378007 |
| H | -1.861971133 | -1.034032072 | 1.111184078  |
| H | -3.815631273 | -2.442894175 | 0.673873047  |
| H | -5.578295400 | -1.684541124 | -0.855018061 |
| H | -5.384957386 | 0.519255038  | -1.962581143 |
| H | -3.432964249 | 1.941186141  | -1.534327113 |
| C | -1.317771092 | 1.427928105  | 0.023350999  |
| O | -1.702131123 | 2.677761194  | 0.278511019  |
| H | 1.967895141  | -1.619117115 | -0.764833054 |
| H | 3.219111229  | 2.310687166  | 0.475157036  |
| O | 4.064676295  | -0.010627001 | -0.116938007 |
| C | 4.478374320  | -1.315829096 | -0.418769030 |
| H | 5.552343400  | -1.312456094 | -0.314319025 |
| H | 4.224321303  | -1.592607112 | -1.435949104 |
| H | 4.060354293  | -2.039750145 | 0.271593021  |
| H | -0.319766021 | -0.969083069 | -0.706132052 |
| O | 0.813908058  | 3.230410232  | 0.539201041  |
| H | -0.932742065 | 3.234980234  | 0.413852032  |
| C | 3.407998244  | 5.554712399  | 1.730660122  |
| O | 2.266502163  | 5.865824420  | 0.994396072  |
| H | 1.813629130  | 5.062804363  | 0.770384055  |
| H | 3.183386230  | 4.924698356  | 2.588815188  |
| H | 3.828472278  | 6.483168467  | 2.094007149  |
| H | 4.164198300  | 5.054511362  | 1.127197082  |
| C | -4.269606307 | 5.545711401  | -0.280331018 |
| O | -4.454673318 | 4.160483302  | -0.263649017 |
| H | -3.685316264 | 3.738294267  | 0.095327006  |
| H | -5.171266374 | 5.988058432  | -0.681470048 |
| H | -3.433295245 | 5.840904420  | -0.910528066 |
| H | -4.108574294 | 5.948627430  | 0.716704050  |
